# Supplementary material for: Can linear transportation infrastructure verges constitute a habitat and/or a corridor for vertebrates in temperate ecosystems? A systematic review
Source: Springer Nature journal article supplement (doi:10.1186/s13750-020-00196-7), 2020-06-05
Supplement: MOESM5 [file 13750_2020_196_MOESM5_ESM.xlsx]

## Sheet: README
Additional file 5: Articles excluded at full-text. List of articles excluded at full-text screening with their reasons for exclusion.
Column descriptions
ID_doc	Unique identifier of the publication
Source	Source of the publication (Web of Science Core Collection (WOS), Zoological Record (ZR), grey literature (GREY_LITT)
DOI	Digital Object Identifier of the publication
Publication_year	Year of the publication
Publication_author	Author(s) of the publication
Publication_title	Title of the publication
PhD_chapter	In case the publication is a PhD thesis, chapter of the thesis considered
Publication_journal	Journal of the publication
Reasons_for_rejection	Reasons of exclusion at full-text screening

## Sheet: File
ID_doc	Source	DOI	Publication_year	Publication_author	Publication_title	PhD_chapter	Publication_journal	Reasons_for_rejection
WOS_4	WOS	10.1046/j.1365-294x.1998.00487.x	1998	Aars, J.; Ims, R. A.; Liu, H. P.; Mulvey, M.; Smith, M. H.	Bank voles in linear habitats show restricted gene flow as revealed by mitochondrial DNA (mtDNA)	NA	Molecular Ecology	Sites are not in the bioclimatic region
WOS_32	WOS	10.1016/j.biocon.2009.07.012	2009	Abbott, I. M.; Sleeman, D. P.; Harrison, S.	Bat activity affected by sewage effluent in Irish rivers	NA	Biological Conservation	The comparator is inappropriate
WOS_33	WOS	10.1016/j.landurbplan.2012.03.015	2012	Abbott, Isobel M.; Butler, Fidelma; Harrison, Simon	When flyways meet highways - The relative permeability of different motorway crossing sites to functionally diverse bat species	NA	Landscape and Urban Planning	The document meets previous screening exclusion criteria (Outcome)
ACTU_WOS_T_6776	WOS	10.3996/052015-JFWM-046	2016	Abella, SR; Berry, KH	Enhancing and Restoring Habitat for the Desert Tortoise	NA	NA	Sites are not in the bioclimatic region
ACTU_WOS_T_6745	WOS	10.1111/acv.12235	2016	Abrahms, B; Jordan, NR; Golabek, KA; McNutt, JW; Wilson, AM; Brashares, JS	Lessons from integrating behaviour and resource selection: activity-specific responses of African wild dogs to roads	NA	NA	Sites are not in the bioclimatic region
ACTU_WOS_F_1074	WOS	10.1655/HERPETOLOGICA-D-16-00048.1	2017	Acharya, KP; Khadka, BK; Jnawali, SR; Malla, S; Bhattarai, S; Wikramanayake, E; Kohl, M	Conservation and Population Recovery of Gharials (Gavialis gangeticus) in Nepal	NA	NA	Sites are not in the bioclimatic region
ZR_10213	ZR	NA	1993	Adam, Michael D.; Lacki, Michael J.	Factors affecting amphibian use of road-rut ponds in Daniel Boone National Forest.	NA	NA	The document meets previous screening exclusion criteria (Exposure)
ZR_32	ZR	NA	2015	Adams, Rachael V.; Burg, Theresa M.	Gene Flow of a Forest-Dependent Bird across a Fragmented Landscape.	NA	NA	Sites are not in the bioclimatic region
WOS_202	WOS	10.1007/BF00007264	1993	ADMIRAAL, W.; VANDERVELDE, G.; SMIT, H.; CAZEMIER, WG	THE RIVERS RHINE AND MEUSE IN THE NETHERLANDS - PRESENT STATE AND SIGNS	NA	Hydrobiologia	The document is a review
ACTU_WOS_T_2486	WOS	10.1002/jwmg.21262	2017	Agha, M; Smith, AL; Lovich, JE; Delaney, D; Ennen, JR; Briggs, J; Fleckenstein, LJ; Tennant, LA; Puffer, SR; Walde, A; Arundel, TR; Price, SJ; Todd, BD	Mammalian Mesocarnivore Visitation at Tortoise Burrows in a Wind Farm	NA	NA	The document meets previous screening exclusion criteria (Exposure)
WOS_227	WOS	NA	2006	Agic, Ivancica Jurcevic	Ravens, Corvus corax (L. 1758), nesting on high-voltage transmission line pylons in Croatia	NA	Belgian Journal of Zoology	There is no comparator
WOS_230	WOS	10.1007/BF00034051	1995	AGOSTINHO, AA; ZALEWSKI, M.	THE DEPENDENCE OF FISH COMMUNITY STRUCTURE AND DYNAMICS ON FLOODPLAIN AND RIPARIAN ECOTONE ZONE IN PARANA RIVER, BRAZIL	NA	Hydrobiologia	The document meets previous screening exclusion criteria (Population)
ZR_58	ZR	NA	2011	Aguiar, Lucas M.; Ludwig, Gabriela; Roper, James J.; Svoboda, Walfrido K.; Navarro, Italmar T.; Passos, Fernando C.	Howler and capuchin monkey densities in riparian forests on islands and adjacent shores on the upper Parana River, southern Brazil.	NA	NA	Sites are not in the bioclimatic region
WOS_249	WOS	10.1590/S0101-81752007000400006	2007	Aguiar, Lucas M.; Ludwig, Gabriela; Svoboda, Walfrido K.; Hilst, Carmen L. S.; Navarro, Italmar T.; Passos, Fernando C.	Occurrence, local extinction and conservation of Primates in the corridor of the Upper Parana River, with notes on other mammals	NA	Revista Brasileira De Zoologia	Sites are not in the bioclimatic region
WOS_268	WOS	10.1139/Z10-069	2010	Ahlers, A. A.; Schooley, R. L.; Heske, E. J.; Mitchell, M. A.	Effects of flooding and riparian buffers on survival of muskrats (Ondatra zibethicus) across a flashiness gradient	NA	Canadian Journal of Zoology-Revue Canadienne De Zoologie	Sites are not in the bioclimatic region
WOS_269	WOS	10.2981/10-044	2010	Ahlers, Adam A.; Heske, Edward J.; Schooley, Robert L.; Mitchell, Mark A.	Home ranges and space use of muskrats Ondatra zibethicus in restricted linear habitats	NA	Wildlife Biology	Sites are not in the bioclimatic region
WOS_364	WOS	10.1007/s11355-010-0105-4	2010	Akasaka, Takumi; Akasaka, Munemitsu; Yanagawa, Hisashi	Relative importance of the environmental factors at site and landscape scales for bats along the riparian zone	NA	Landscape and Ecological Engineering	Sites are not in the bioclimatic region
WOS_365	WOS	10.1016/j.biocon.2009.01.028	2009	Akasaka, Takumi; Nakano, Daisuke; Nakamura, Futoshi	Influence of prey variables, food supply, and river restoration on the foraging activity of Daubenton's bat (Myotis daubentonii) in the Shibetsu River, a large lowland river in Japan	NA	Biological Conservation	Sites are not in the bioclimatic region
WOS_395	WOS	NA	2007	Akinpelu, Akinsola I.; Areo, Adebowale	The snakes of Osun grove: A world heritage site in Osogbo, Nigeria	NA	Revista De Biologia Tropical	Sites are not in the bioclimatic region
ACTU_WOS_T_1544	WOS	10.1670/16-049	2017	Akresh, ME; King, DI; Timm, BC; Brooks, RT	Fuels Management and Habitat Restoration Activities Benefit Eastern Hognose Snakes (Heterodon platirhinos) in a Disturbance-Dependent Ecosystem	NA	NA	Sites are not in the bioclimatic region
WOS_401	WOS	10.1525/cond.2009.080059	2009	Akresh, Michael E.; Dinse, Keely; Foufopoulos, Johannes; Schubel, Stephanie C.; Kowalczyk, Theresa	PASSERINE BREEDING AND POST-FLEDGLING HABITAT USE IN RIPARIAN AND UPLAND TEMPERATE FORESTS OF THE AMERICAN MIDWEST	NA	Condor	Sites are not in the bioclimatic region
ACTU_ZR_F_330	ZR	NA	2017	Albanesi, Sebastian A.; Jayat, J. Pablo; Alberti, Paola; Brown, Alejandro D.	NEW RECORD OF RIVER OTTER (Lontra longicaudis Olfers, 1818) IN THE EXTREME SOUTH OF YUNGAS OF NORTHWESTERN ARGENTINA.	NA	NA	Sites are not in the bioclimatic region
ACTU_WOS_T_9550	WOS	10.1111/1365-2745.12473	2015	Albert, A; Brisson, J; Belzile, F; Turgeon, J; Lavoie, C	Strategies for a successful plant invasion: the reproduction of Phragmites australis in north-eastern North America	NA	NA	Sites are not in the bioclimatic region
ZR_105	ZR	NA	2009	Alcalde, J. T.	Myotis alcathoe Helversen & Heller, 2001 and Pipistrellus pygmaeus (Leach, 1825), new species of Chiroptera in Navarre.	NA	NA	Language is not English or French
WOS_500	WOS	10.1007/s10457-012-9511-y	2012	Alessandro, Paletto; Marta, Chincarini	Heterogeneity of linear forest formations: differing potential for biodiversity conservation. A case study in Italy	NA	Agroforestry Systems	The document meets previous screening exclusion criteria (Exposure)
ACTU_WOS_F_2330	WOS	10.1093/jmammal/gyw032	2016	Alexander, JL; Olimb, SK; Bly, KLS; Restani, M	Use of least-cost path analysis to identify potential movement corridors of swift foxes in Montana	NA	NA	Sites are not in the bioclimatic region
WOS_509	WOS	NA	2008	Alexander, John D.; Stephens, Jaime L.; Seavy, Nathaniel E.	Livestock utilization and bird community composition in mixed-conifer forest and oak woodland in southern Oregon	NA	Northwest Science	The document meets previous screening exclusion criteria (Exposure)
WOS_514	WOS	10.1016/S0968-090X(00)00014-0	2000	Alexander, S. M.; Waters, N. M.	The effects of highway transportation corridors on wildlife: a case study of Banff National Park	NA	Transportation Research Part C-Emerging Technologies	Sites are not in the bioclimatic region
WOS_529	WOS	NA	2011	Alho, C. J. R.; Fischer, E.; Oliveira-Pissini, L. F.; Santos, C. F.	Bat-species richness in the Pantanal floodplain and its surrounding uplands	NA	Brazilian Journal of Biology	Sites are not in the bioclimatic region
ZR_127	ZR	NA	2010	Ali, A. Mohamed Samsoor; Asokan, S.; Manikannan, R.	Habitat-related Density and Activity Patterns of the White-breasted Kingfisher Halcyon smyrnensis in Cauvery Delta, Southern India.	NA	NA	Sites are not in the bioclimatic region
ACTU_WOS_T_399	WOS	10.1007/s10661-018-6615-5	2018	Ali, A; Zaidi, F; Fatima, SH; Adnan, M; Ullah, S	Spatial modeling of rat bites and prediction of rat infestation in Peshawar valley using binomial kriging with logistic regression	NA	NA	Sites are not in the bioclimatic region
WOS_576	WOS	10.1139/F03-019	2003	Allan, J. D.; Wipfli, M. S.; Caouette, J. P.; Prussian, A.; Rodgers, J.	Influence of streamside vegetation on inputs of terrestrial invertebrates to salmonid food webs	NA	Canadian Journal of Fisheries and Aquatic Sciences	The document meets exclusion criteria for waterways
WOS_603	WOS	10.1642/0004-8038(2006)123[1110:AOBBWF]2.0.CO;2	2006	Allen, Jennifer C.; Krieger, Sharlene M.; Walters, Jeffrey R.; Collazo, Jaime A.	Associations of breeding birds with fire-influenced and riparian-upland gradients in a longleaf pine ecosystem	NA	Auk	The document meets exclusion criteria for waterways
WOS_637	WOS	10.1016/j.jaridenv.2007.03.001	2007	Allsopp, N.; Gaika, L.; Knight, R.; Monakisi, C.; Hoffman, M. T.	The impact of heavy grazing on an ephemeral river system in the succulent karoo, South Africa	NA	Journal of Arid Environments	Sites are not in the bioclimatic region
ZR_151	ZR	NA	1999	Almeida, Maria Elisa de Castro; Vielliard, Jacques M. E.; Dias, Manoel Martins	Bird community composition of two riparian forests at Jacare-Pepira river, Sao Paulo, Brazil.	NA	NA	Language is not English or French
ACTU_WOS_F_1957	WOS	10.1017/S0266467416000377	2016	Almeida, SM; Silva, LC; Cardoso, MR; Cerqueira, PV; Juen, L; Santos, MPD	The effects of oil palm plantations on the functional diversity of Amazonian birds	NA	NA	Sites are not in the bioclimatic region
ACTU_WOS_F_4039	WOS	10.1590/S1984-46702015000100002	2015	Almeida-Gomes, M; Rocha, CFD; Vieira, MV	Anuran community composition along two large rivers in a tropical disturbed landscape	NA	NA	The document meets exclusion criteria for waterways
ZR_153	ZR	NA	2009	Almenar, David; Aihartza, Joxerra; Goiti, Urtzi; Salsamendi, Egoitz; Garin, Inazio	Foraging behaviour of the long-fingered bat Myotis capaccinii: implications for conservation and management.	NA	NA	The comparator is inappropriate
ZR_10292	ZR	NA	2012	Altaf, Muhammad; Khan, Abdul Majid; Umair, Muhammad; Irfan; Munir, Muhammad Asif	Status of wild birds and mammals in urban habitats of Gujranwala, Punjab, Pakistan.	NA	NA	Sites are not in the bioclimatic region
WOS_710	WOS	NA	2003	Altman, B.; Boulay, M.; Dowlan, S.; Crannell, D.; Russell, K.; Beal, K.; Dillon, J.	Willow Flycatcher nesting ecology and habitat relationships in the Willamette Basin, Oregon	NA	NA	The document meets exclusion criteria for waterways
WOS_720	WOS	NA	2013	Alvarez, Jeff A.; Cook, David G.; Yee, Julie L.; van Hattem, Michael G.; Fong, Darren R.; Fisher, Robert N.	COMPARATIVE MICROHABITAT CHARACTERISTICS AT OVIPOSITION SITES OF THE CALIFORNIA RED-LEGGED FROG (RANA DRAYTONII)	NA	Herpetological Conservation and Biology	The document meets previous screening exclusion criteria (Outcome)
ACTU_WOS_T_7257	WOS	10.1371/journal.pone.0148842	2016	Amaral, KE; Palace, M; O'Brien, KM; Fenderson, LE; Kovach, AI	Anthropogenic Habitats Facilitate Dispersal of an Early Successional Obligate: Implications for Restoration of an Endangered Ecosystem	NA	NA	Sites are not in the bioclimatic region
WOS_776	WOS	10.1002/jwmg.685	2014	Amelon, Sybill K.; Thompson, Frank R.; Millspaugh, Joshua J.	Resource Utilization by Foraging Eastern Red Bats (Lasiurus borealis) in the Ozark Region of Missouri	NA	Journal of Wildlife Management	The document meets previous screening exclusion criteria (Exposure)
WOS_778	WOS	10.1007/s00267-008-9112-8	2008	Ament, Rob; Clevenger, Anthony P.; Yu, Olivia; Hardy, Amanda	An assessment of road impacts on wildlife populations in US National Parks	NA	Environmental Management	The document meets previous screening exclusion criteria (Outcome)
WOS_803	WOS	10.2307/1370219	1997	Ammon, E. M.; Stacey, P. B.	Avian nest success in relation to past grazing regimes in a montane riparian system	NA	Condor	The document meets exclusion criteria for waterways
WOS_806	WOS	10.1007/s002670010263	2001	Amoros, C.	The concept of habitat diversity between and within ecosystems applied to river side-arm restoration	NA	Environmental Management	The document is a review
WOS_841	WOS	NA	2012	Anciaes, Marina; Aguilar, Thais Maya; Leite, Lemuel Olivio; Andrade, Renata Dornelas; Marini, Miguel Angelo	NESTING BIOLOGY OF THE YELLOW-OLIVE FLATBILL (TYRANNIDAE, ELANINAE) IN ATLANTIC FOREST FRAGMENTS IN BRAZIL	NA	Wilson Journal of Ornithology	Sites are not in the bioclimatic region
ZR_10316	ZR	NA	2012	Anders, Ole; Kaphegyi, Thomas A. M.; Kubik, Frank	Survey on the dispersal behaviour of a male lynx (Lynx lynx) in the border triangle between the German federal states Thuringia, Lower Saxony and Hesse.	NA	NA	Pdf cannot be obtained
WOS_850	WOS	10.2307/2641293	2000	Andersen, D. C.; Cooper, D. J.	Plant-herbivore-hydroperiod interactions: Effects of native mammals on floodplain tree recruitment	NA	Ecological Applications	Sites are not in the bioclimatic region
WOS_851	WOS	10.1002/(SICI)1099-1646(199909/10)15:5<377::AID-RRR549>3.0.CO;2-Q	1999	Andersen, D. C.; Nelson, S. M.	Rodent use of anthropogenic and 'natural' desert riparian habitat, lower Colorado River, Arizona	NA	Regulated Rivers-Research & Management	Sites are not in the bioclimatic region
WOS_855	WOS	10.1644/1545-1542(2000)081<1087:MPORSM>2.0.CO;2	2000	Andersen, D. C.; Wilson, K. R.; Miller, M. S.; Falck, M.	Movement patterns of riparian small mammals during predictable floodplain inundation	NA	Journal of Mammalogy	Sites are not in the bioclimatic region
ZR_10318	ZR	NA	1989	Andersen, D. E.; Rongstad, O. J.	Surveys for wintering birds of prey in southeastern Colorado: 1983-1988.	NA	NA	Sites are not in the bioclimatic region
WOS_856	WOS	10.2307/3809315	1994	ANDERSEN, DC	DEMOGRAPHICS OF SMALL MAMMALS USING ANTHROPOGENIC DESERT RIPARIAN HABITAT IN ARIZONA	NA	Journal of Wildlife Management	Sites are not in the bioclimatic region
WOS_860	WOS	10.1002/eco.113	2010	Andersen, Douglas C.; Shafroth, Patrick B.	Beaver dams, hydrological thresholds, and controlled floods as a management tool in a desert riverine ecosystem, Bill Williams River, Arizona	NA	Ecohydrology	Sites are not in the bioclimatic region
WOS_883	WOS	10.1016/j.biocon.2005.10.011	2006	Anderson, C. B.; Griffith, C. R.; Rosemond, A. D.; Rozzi, R.; Dollenz, O.	The effects of invasive North American beavers on riparian plant communities in Cape Horn, Chile - Do exotic beavers engineer differently in sub-Antarctic ecosystems?	NA	Biological Conservation	Sites are not in the bioclimatic region
WOS_884	WOS	10.1111/j.1365-2907.2008.00136.x	2009	Anderson, Christopher B.; Pastur, Guillermo Martinez; Lencinas, Maria Vanessa; Wallem, Petra K.; Moorman, Michelle C.; Rosemond, Amy D.	Do introduced North American beavers Castor canadensis engineer differently in southern South America? An overview with implications for restoration	NA	Mammal Review	The document is a review
WOS_897	WOS	10.1676/06-079.1	2007	Anderson, Eric M.	Changes in bird communities and willow habitats associated with fed elk	NA	Wilson Journal of Ornithology	Sites are not in the bioclimatic region
ZR_239	ZR	NA	2013	Anderson, James T.; Solis, Amy B.; Osbourne, Joseph D.	HERPETOFAUNAL ABUNDANCE IN FORESTED EDGE AND INTERIOR LOCATIONS OF WEST VIRGINIA.	NA	NA	The document meets previous screening exclusion criteria (Exposure)
ACTU_WOS_F_3757	WOS	10.1111/acv.12170	2015	Anderson, NL; Paszkowski, CA; Hood, GA	Linking aquatic and terrestrial environments: can beaver canals serve as movement corridors for pond-breeding amphibians?	NA	NA	Sites are not in the bioclimatic region
WOS_924	WOS	10.1016/j.foreco.2013.06.055	2014	Anderson, Paul D.; Poage, Nathan J.	The Density Management and Riparian Buffer Study: A large-scale silviculture experiment informing riparian management in the Pacific Northwest, USA	NA	Forest Ecology and Management	The document meets exclusion criteria for waterways
WOS_932	WOS	10.2307/2424698	1977	ANDERSON, SH; MANN, K.; SHUGART, HH	EFFECT OF TRANSMISSION-LINE CORRIDORS ON BIRD POPULATIONS	NA	American Midland Naturalist	The comparator is inappropriate
ACTU_WOS_F_351	WOS	10.1016/j.landurbplan.2017.11.003	2018	Andrade, R; Bateman, HL; Franklin, J; Allen, D	Waterbird community composition, abundance, and diversity along an urban gradient	NA	NA	Sites are not in the bioclimatic region
WOS_951	WOS	10.2193/0022-541X(2005)069[1125:TEOSFC]2.0.CO;2	2005	Andreassen, H. P.; Gundersen, H.; Storaas, T.	The effect of scent-marking, forest clearing, and supplemental feeding on moose-train collisions	NA	Journal of Wildlife Management	Sites are not in the bioclimatic region
ACTU_ZR_T_724	ZR	NA	2016	Andren, Mick	Monitoring the Rufous Scrub-bird Atrichornis rufescens in the New England region.	NA	NA	Pdf cannot be obtained
WOS_958	WOS	NA	2005	Andreone, F.; Guarino, F. M.; Randrianirina, J. E.	Life history traits, age profile, and conservation of the panther chameleon, Furcifer pardalis (Cuvier 1829), at Nosy Be, NW Madagascar	NA	Tropical Zoology	Sites are not in the bioclimatic region
GS_82	GREY_LITT_GoogleScholar	NA	1990	Andrews, A.	Fragmentation of habitat by roads and utility corridors: a review	NA	NA	The document is a review
WOS_975	WOS	10.1007/s10750-006-0047-x	2006	Andrikovics, Sandor; Forro, Laszlo; Gere, Geza; Lakatos, Gyula; Sasvari, Lajos	Water bird guilds and their feeding connections in the Bodrogzug, Hungary	NA	Hydrobiologia	The comparator is inappropriate
ZR_264	ZR	NA	2014	Angarita-Sierra, Teddy	Diagnosis of the conservation state of the amphibian and reptile ensembles from flooded savannas in the river Pauto basin, Casanare, Colombia.	NA	NA	Language is not English or French
ACTU_ZR_F_533	ZR	NA	2016	Angel De Labra-Hernandez, Miguel; Renton, Katherine	Importance of Large, Old Primary Forest Trees in Nest-Site Selection by the Northern Mealy Amazon (Amazona guatemalae).	NA	NA	Sites are not in the bioclimatic region
ZR_10379	ZR	NA	2013	Anonymous	Avian Incidental Take due to Roadside Maintenance Operations in Canada.	NA	NA	The study type is inappropriate (no data, simulation, recommendation)
ACTU_ZR_T_1057	ZR	NA	2016	Anonymous	[Assessment of the seasonal habitat of wild goats (Capra aegagrus) in mountainous areas using maximum entropy approach in Klahqazy National Park.]	NA	NA	Language is not English or French
ZR_288	ZR	NA	2013	Antelo, Claudia M.; Marigliano, Nora L.; Brandan, Zulma J.; Navarro, Celina I.	Birds associated to sections of riparian forest with anthropogenic modifications (Tucuman, Argentina): II. Assemblages present in the dry season and their relation to structural elements of the habitat.	NA	NA	Language is not English or French
WOS_1068	WOS	NA	1996	Anthony, R. G.; Green, G. A.; Forsman, E. D.; Nelson, S. K.	Avian abundance in riparian zones of three forest types in the Cascade Mountains, Oregon	NA	Wilson Bulletin	The document meets exclusion criteria for waterways
WOS_1080	WOS	NA	2011	Anttonen, Marja; Kumpula, Jouko; Colpaert, Alfred	Range Selection by Semi-Domesticated Reindeer (Rangifer tarandus tarandus) in Relation to Infrastructure and Human Activity in the Boreal Forest Environment, Northern Finland	NA	Arctic	Sites are not in the bioclimatic region
WOS_1159	WOS	NA	2008	Arcos, Inty T.; Jimenez, Francisco; Harvey, Celia A.; Casanoves, Fernando	Richness and abundance of birds in riparian forest belts of varied breadths at the Sesesmiles river microwatershed, Copan, Honduras	NA	Revista De Biologia Tropical	Language is not English or French
WOS_1177	WOS	NA	2012	Arendt, Wayne J.; Torrez, Marvin; Vilchez, Sergio	Avian diversity in agroscapes in Nicaragua's north highlands	NA	Ornitologia Neotropical	Language is not English or French
ACTU_WOS_F_1456	WOS	10.19136/era.a4n10.756	2017	Arguelles-Jimenez, J; Macias-Hernandez, S; Rojas-Teran, MD; Gonzalez-Gandara, C; de la Cruz-Francisco, V; Dominguez-Barradas, C	Riparian birds of coastal ecosystems of Tuxpan, Veracruz, Mexico	NA	NA	Language is not English or French
ACTU_WOS_T_700	WOS	10.1007/s00128-018-2272-1	2018	Arikan, K; Arikan, ZY; Turan, SL	Persistent Organochlorine Contaminant Residues in Tissues of Hedgehogs from Turkey	NA	NA	The document meets previous screening exclusion criteria (Exposure)
ZR_328	ZR	NA	2005	Arizaga, Juan; Alonso, Daniel	Migration and wintering of the penduline tit (Remiz pendulinus) in Txingudi marshland (N Spain).	NA	NA	Language is not English or French
WOS_1217	WOS	10.1016/j.jaridenv.2007.12.017	2008	Arizmendi, Ma D. C.; Davila, P.; Estrada, A.; Figueroa, E.; Marquez-Valdelamar, L.; Lira, R.; Oliveros-Galindo, O.; Valiente-Banuet, A.	Riparian Mesquite bushes are important for bird conservation in tropical and Mexico	NA	Journal of Arid Environments	Sites are not in the bioclimatic region
WOS_1220	WOS	10.1016/j.foreco.2009.11.029	2010	Arkle, Robert S.; Pilliod, David S.	Prescribed fires as ecological surrogates for wildfires: A stream and riparian perspective	NA	Forest Ecology and Management	Sites are not in the bioclimatic region
WOS_1222	WOS	10.2989/00306525.2014.971450	2014	Arkumarev, Volen; Dobrev, Vladimir; Abebe, Yilma D.; Popgeorgiev, Georgi; Nikolov, Stoyan C.	Congregations of wintering Egyptian Vultures Neophron percnopterus in Afar, Ethiopia: present status and implications for conservation	NA	Ostrich	Sites are not in the bioclimatic region
ZR_332	ZR	NA	2011	Arlettaz, Raphael; Ligon, Alain; Sierro, Antoine; Werner, Philippe; Kery, Marc; Oggier, Pierre-Alain	River bed restoration boosts habitat mosaics and the demography of two rare non-aquatic vertebrates.	NA	NA	Sites are not in the bioclimatic region
ZR_336	ZR	10.1676/04-032	2004	Armacost, J. W.	The nest, eggs, and nestlings of the Castelnau's antshrike (Thamnophilus cryptoleucus), with notes on its ecology and conservation.	NA	NA	Sites are not in the bioclimatic region
WOS_1225	WOS	10.1525/cond.2012.100200	2012	Armacost, J. W.; Capparella, Angelo P.	USE OF MAINLAND HABITATS BY SUPPOSED RIVER-ISLAND OBLIGATE BIRDS ALONG THE AMAZON RIVER IN PERU	NA	Condor	Sites are not in the bioclimatic region
ZR_347	ZR	NA	1979	Armstrong, D. M.	Ecological distribution of rodents in Canyonlands National Park, Utah.	NA	NA	Sites are not in the bioclimatic region
ZR_356	ZR	NA	1997	Arnold, Andreas; Braun, Monika; Haussler, Ursel; Heinz, Brigitte; Nagel, Alfred; Rietschel, Gerhard	Rhine bridge near Mannheim as a trap for bats.	NA	NA	Language is not English or French
ZR_10425	ZR	NA	2014	Arnold, Peter J.; Hoeser, Norbert	The breeding population of the Common Raven Corvus corax near Frohburg in Western Saxony (1978-2014).	NA	NA	Pdf cannot be obtained
EM_17	GREY_LITT_email_request	NA	2010	Arthur, L.; Lemaire, M.; Barbotte, Q.; Jaouen, M.	Etude du franchissement des voies routières par les chiroptères en transit. Synthèse 2010	NA	NA	The document meets previous screening exclusion criteria (Exposure)
WOS_1298	WOS	10.5253/078.097.0418	2009	Artuso, Christian	Breeding and population density of the Eastern Screech Owl Megascops asio at the northern periphery of its range	NA	Ardea	Sites are not in the bioclimatic region
ZR_10435	ZR	NA	2010	Asari, Yumiko; Johnson, Christopher N.; Parsons, Mark; Larson, Johan	Gap-crossing in fragmented habitats by mahogany gliders (Petaurus gracilis). Do they cross roads and powerline corridors?	NA	NA	Sites are not in the bioclimatic region
ACTU_WOS_T_3358	WOS	10.1007/s10980-017-0485-z	2017	Ascensao, F; Lucas, PS; Costa, A; Bager, A	The effect of roads on edge permeability and movement patterns for small mammals: a case study with Montane Akodont	NA	NA	Sites are not in the bioclimatic region
WOS_1326	WOS	10.1007/s11284-006-0004-1	2007	Ascensao, Fernando; Mira, Antonio	Factors affecting culvert use by vertebrates along two stretches of road in southern Portugal	NA	Ecological Research	The document meets previous screening exclusion criteria (Outcome)
ACTU_WOS_T_2667	WOS	10.1111/btp.12441	2017	Asensio, N; Murillo-Chacon, E; Schaffner, CM; Aureli, F	The effect of roads on spider monkeys' home range and mobility in a heterogeneous regenerating forest	NA	NA	Sites are not in the bioclimatic region
EM_20	GREY_LITT_email_request	NA	2012	ASF; CERA Environnement	Evolution de la biodiversité des dépendances autoroutières. Etude comparative 1995-2009	NA	NA	The comparator is inappropriate
WOS_1361	WOS	NA	2003	Asokan, S.; Thiyagesan, K.; Nagarajan, R.; Kanakasabai, R.	Studies on Merops orientalis latham 1801 with special reference to its population in Mayiladuthurai, Tamil Nadu	NA	Journal of Environmental Biology	Pdf cannot be obtained
ZR_408	ZR	NA	2008	Ater, Mohammed; Radi, Mohammed; Kadiri, Mohamed; Hmimsa, Younes; Achtak, Hafid; Qninba, Abdeljebbar	Structure and diversity of the avifauna of the ripisylves of the catchment area of Laou Wadi.	NA	NA	The comparator is inappropriate
WOS_1399	WOS	10.2307/1369595	1993	ATKINSON, EC	WINTER TERRITORIES AND NIGHT ROOSTS OF NORTHERN SHRIKES IN IDAHO	NA	Condor	Sites are not in the bioclimatic region
ACTU_WOS_F_257	WOS	10.1007/s00442-018-4071-0	2018	Atuo, FA; O'Connell, TJ	Superpredator proximity and landscape characteristics alters nest site selection and breeding success of a subordinate predator	NA	NA	The document meets previous screening exclusion criteria (Exposure)
WOS_1442	WOS	10.1111/j.1654-109X.2011.01124.x	2011	Auffret, Alistair G.	Can seed dispersal by human activity play a useful role for the conservation of European grasslands?	NA	Applied Vegetation Science	The document is a review
ZR_420	ZR	NA	2007	Aulak, Wladyslaw	European beaver (Castor fiber L., 1758) population in the Augustowska Primeval Forest.	NA	NA	Sites are not in the bioclimatic region
ACTU_WOS_F_144	WOS	NA	2018	Austin, LV; Silvis, A; Ford, WM; Muthersbaugh, M; Powers, KE	Bat Activity Following Restoration Prescribed Burning in the Central Appalachian Upland and Riparian Habitats	NA	NA	The document meets exclusion criteria for waterways
ACTU_ZR_F_232	ZR	NA	2017	Averett, Joshua P.; Endress, Bryan A.; Rowland, Mary M.; Naylor, Bridgett J.; Wisdom, Michael J.	Wild ungulate herbivory suppresses deciduous woody plant establishment following salmonid stream restoration.	NA	NA	The document meets exclusion criteria for waterways
ZR_437	ZR	NA	2012	Avila-Cabadilla, Luis Daniel; Sanchez-Azofeifa, Gerardo Arturo; Stoner, Kathryn Elizabeth; Alvarez-Anorve, Mariana Yolotl; Quesada, Mauricio; Portillo-Quintero, Carlos Alonso	Local and Landscape Factors Determining Occurrence of Phyllostomid Bats in Tropical Secondary Forests.	NA	NA	Sites are not in the bioclimatic region
ACTU_WOS_F_1119	WOS	10.1093/jmammal/gyx006	2017	Aya-Cuero, C; Rodriguez-Bolanos, A; Superina, M	Population density, activity patterns, and ecological importance of giant armadillos (Priodontes maximus) in Colombia	NA	NA	Sites are not in the bioclimatic region
ZR_441	ZR	NA	2014	Aymerich, Pere; Gosalbez, Joaquim	Iberian Desman Galemys pyrenaicus (E. Geoffroy Saint-Hilaire, 1811) in the Southern Pyrenees.	NA	NA	Language is not English or French
WOS_1571	WOS	NA	1994	BACHERT, S.	EUROPIPE - GAS-PIPELINE PLANNED THROUGH THE WADDEN SEA - THE IMPACT ON BIRDS AND THE IMPLEMENTATION OF NATIONAL AND INTERNATIONAL LAWS AND CONVENTIONS ON NATURE CONSERVATION	NA	Ophelia	The study type is inappropriate (no data, simulation, recommendation)
WOS_1617	WOS	NA	2012	Bager, Alex; da Rosa, Clarissa Alves	Impacts of the BR-392 highway on bird communities in extreme southern Brazil	NA	Revista Brasileira De Ornitologia	Language is not English or French
ZR_10507	ZR	NA	2007	Bagyura, Janos; Fidloczky, Jozsef; Szitta, Tamas; Prommer, Matyas; Tihanyi, Gabor; Zalai, Tamas; Viszlo, Levente; Vaczi, Miklos; Toth, Imre; Haraszthy, Laszlo	Annual report of the Saker falcon working group - 2007.	NA	NA	Pdf cannot be obtained
WOS_1652	WOS	NA	2003	Bai, M. L.; Wichmann, F.; Muhlenberg, M.	The abundance of tree holes and their utilization by hole-nesting birds in a primeval boreal forest of Mongolia	NA	Acta Ornithologica	Sites are not in the bioclimatic region
ZR_10512	ZR	NA	2000	Bailey, James A.; Klingel, Jon; Davis, Charles A.	Status of nesting habitat for lesser prairie-chicken in New Mexico.	NA	NA	Sites are not in the bioclimatic region
WOS_1667	WOS	10.1111/j.1365-2311.2006.00774.x	2006	Bailey, Joseph K.; Whitham, Thomas G.	Interactions between cottonwood and beavers positively affect sawfly abundance	NA	Ecological Entomology	The document does not dealt with our 6 specific questions
ZR_482	ZR	NA	2005	Baillie, B. R.; Glaser, A. B.	Roost habitat of a North Island blue duck (Hymenolaimus malacorhynchos) population.	NA	NA	The comparator is inappropriate
ZR_491	ZR	NA	2003	Baker, Bruce W.	Beaver (Castor canadensis) in heavily browsed environments.	NA	NA	Sites are not in the bioclimatic region
WOS_1711	WOS	10.2307/4002484	1995	BAKER, BW; CADE, BS	PREDICTING BIOMASS OF BEAVER FOOD FROM WILLOW STEM DIAMETERS	NA	Journal of Range Management	Sites are not in the bioclimatic region
WOS_1721	WOS	10.2193/0022-541X(2006)70[207:DHOFLM]2.0.CO;2	2006	Baker, M. D.; Lacki, M. J.	Day-roosting habitat of female long-legged myotis in ponderosa pine forests	NA	Journal of Wildlife Management	The document meets exclusion criteria for waterways
ZR_514	ZR	NA	1995	Baldi, A.; Zagon, A.; Bankovics, A.	Status of the avifauna in the Szigetkoz riparian area: an ornithological evaluation for nature conservation.	NA	NA	The comparator is inappropriate
ACTU_WOS_F_3190	WOS	10.2994/SAJH-D-15-00004.1	2015	Baldi, LC; dos Santos, FB; Esteves, KE; Ferreira, FC; Rocha, MT; Santana, JM; Teixeira, PC; Ferreira, CM	Anuran Communities in Different Riparian Habitats: Native Forest, Secondary Forest, and Sugarcane	NA	NA	The document meets exclusion criteria for waterways
ZR_519	ZR	10.1644/07-MAMM-A-053R1.1	2008	Baldwin, Roger A.; Bender, Louis C.	Distribution, occupancy, and habitat correlates of American martens (Martes americana) in Rocky Mountain National Park, Colorado.	NA	NA	Sites are not in the bioclimatic region
ZR_520	ZR	NA	1990	Balerstet, J.; Balerstet, T.; Wargacki, K.; Zurowski, W.	Muskrat, Ondatra zibethicus Linnaeus, 1766 and American mink, Mustela vison Schreber, 1777 in the 'Druzno Lake' Reserve.	NA	NA	Pdf cannot be obtained
ACTU_ZR_F_423	ZR	NA	2017	Balestrieri, A.; Remonti, L.; Morotti, L.; Saino, N.; Prigioni, C.; Guidali, F.	Multilevel habitat preferences of Apodemus sylvaticus and Clethrionomys glareolus in an intensively cultivated agricultural landscape.	NA	NA	The document meets exclusion criteria for waterways
ACTU_WOS_F_2144	WOS	10.1016/j.mambio.2016.05.005	2016	Balestrieri, A; Ruiz-Gonzalez, A; Vergara, M; Capelli, E; Tirozzi, P; Alfino, S; Minuti, G; Prigioni, C; Saino, N	Pine marten density in lowland riparian woods: A test of the Random Encounter Model based on genetic data	NA	NA	The document meets previous screening exclusion criteria (Exposure)
WOS_1794	WOS	10.1007/s11284-014-1220-8	2015	Balestrieri, Alessandro; Remonti, Luigi; Ruiz-Gonzalez, Aritz; Zenato, Michele; Gazzola, Andrea; Vergara, Maria; Dettori, Ettore E.; Saino, Nicola; Capelli, Enrica; Gomez-Moliner, Benjamin J.; Guidali, Franca; Prigioni, Claudio	Distribution and habitat use by pine marten Martes martes in a riparian corridor crossing intensively cultivated lowlands	NA	Ecological Research	Sampling points are not on verges (exposure)
ZR_522	ZR	NA	2008	Balestrieri, Alessandro; Remonti, Luigi; Smiroldo, Giorgio; Prigioni, Claudio; Reggiani, Gabriella	Surveying otter Lutra lutra distribution at the southern limit of its Italian range.	NA	NA	The comparator is inappropriate
WOS_1808	WOS	10.1111/j.1365-294X.2009.04322.x	2009	Balkenhol, Niko; Waits, Lisette P.	Molecular road ecology: exploring the potential of genetics for investigating transportation impacts on wildlife	NA	Molecular Ecology	The document is a review
ZR_10551	ZR	NA	2013	Balkhande, J. V.; Kulkarni, A. N.	Effect of different habitats on population density of House sparrow (Passer domesticus) at Purna region, Dist. Parbhani, Maharashtra, India.	NA	NA	Sites are not in the bioclimatic region
WOS_1810	WOS	10.1080/028275802320435441	2002	Ball, J. P.; Dahlgren, J.	Browsing damage on pine (Pinus sylvestris and P-contorta) by a migrating moose (Alces alces) population in winter: Relation to habit at composition and road barriers	NA	Scandinavian Journal of Forest Research	Sites are not in the bioclimatic region
WOS_1885	WOS	10.1007/s11252-012-0228-5	2012	Banville, Melanie J.; Bateman, Heather L.	Urban and wildland herpetofauna communities and riparian microhabitats along the Salt River, Arizona	NA	Urban Ecosystems	Sites are not in the bioclimatic region
ACTU_WOS_F_1362	WOS	10.1016/j.landurbplan.2016.09.026	2017	Banville, MJ; Bateman, HL; Earl, SR; Warren, PS	Decadal declines in bird abundance and diversity in urban riparian zones	NA	NA	Sites are not in the bioclimatic region
ACTU_GREY_LITT_68	GREY_LITT_ITTECOP	NA	2015	Barbe, Eric; et al.	ITT et Modélisation Paysagère pour l'Appréciation Dynamique des ImpaCts sur le Territoire	NA	NA	The study type is inappropriate (no data, simulation, recommendation)
ACTU_WOS_F_3248	WOS	NA	2015	Barbosa, MO; Pinheiro, RT; Barbosa, KVC	Population estimate of Mergus octosetaceus in the Jalapao region, Tocantins, Brazil	NA	NA	Sites are not in the bioclimatic region
EM_33	GREY_LITT_email_request	NA	2008	Bardet, Olivier; Frochot, Bernard	Biodiversité des bords de route de Côte d'Or. Enjeux - Problématiques - Gestion.	NA	NA	The study type is inappropriate (no data, simulation, recommendation)
WOS_1939	WOS	10.1007/s10021-001-0020-5	2001	Bardgett, R. D.; Anderson, J. M.; Behan-Pelletier, V.; Brussaard, L.; Coleman, D. C.; Ettema, C.; Moldenke, A.; Schimel, J. P.; Wall, D. H.	The influence of soil biodiversity on hydrological pathways and the transfer of materials between terrestrial and aquatic ecosystems	NA	Ecosystems	The document is a review
ACTU_WOS_F_1794	WOS	10.1894/0038-4909-61.4.286	2016	Barela, IA; Frey, JK	HABITAT AND FORAGE SELECTION BY THE AMERICAN BEAVER (CASTOR CANADENSIS) ON A REGULATED RIVER IN THE CHIHUAHUAN DESERT	NA	NA	Sites are not in the bioclimatic region
WOS_1954	WOS	NA	2005	Barja, I.; de Miguel, F. J.; Barcena, F.	Faecal marking behaviour of Iberian wolf in different zones of their territory	NA	Folia Zoologica	The comparator is inappropriate
ZR_10588	ZR	10.1007/s00114-004-0557-1	2004	Barja, Isabel; de Miguel, Francisco Javier; Barcena, Felipe	The importance of crossroads in faecal marking behaviour of the wolves (Canis lupus).	NA	NA	The comparator is inappropriate
WOS_1965	WOS	10.1007/s10661-006-7721-3	2006	Barker, Linda S.; Felton, Gary K.; Russek-Cohen, Estelle	Use of Maryland Biological Stream Survey data to determine effects of agricultural riparian buffers on measures of biological stream health	NA	Environmental Monitoring and Assessment	The document meets exclusion criteria for waterways
WOS_1977	WOS	NA	2001	Barnes, D. M.; Mallik, A. U.	Effects of Beaver, Castor canadensis, herbivory on streamside vegetation in a northern Ontario watershed	NA	Canadian Field-Naturalist	Sites are not in the bioclimatic region
WOS_1988	WOS	NA	2014	Barnett, Juan Mazar; Gomes da Silva, Cayo Lima; Pereira de Araujo, Helder Farias; Roos, Andrei Langeloh; Machado, Caio Graco; Uejima, Angelica Maria K.; Naka, Luciano N.	The avifauna of Curaca (Bahia): the last stronghold of Spix's Macaw	NA	Revista Brasileira De Ornitologia	Sites are not in the bioclimatic region
WOS_2015	WOS	10.1111/j.1469-1795.1998.tb00020.x	1998	Barreto, Guillermo R.; Rushton, Steve P.; Strachan, Rob; Macdonald, David W.	The role of habitat and mink predation in determining the status and distribution of water voles in England	NA	Animal Conservation	The comparator is inappropriate
ZR_580	ZR	NA	2009	Barrett, Gary W.; Shivers, Stephen; Meek, Kelli; Shuman, Matthew	Home-range size of the southern flying squirrel (Glaucomys volans) in a forested riparian peninsula.	NA	NA	Pdf cannot be obtained
ACTU_WOS_F_2273	WOS	10.1643/CE-15-318	2016	Barrett, K; Guyer, C; Samoray, ST; Kanno, Y	Stream and Riparian Habitat Use by Anurans along a Forested Gradient in Western Georgia, USA	NA	NA	The document meets previous screening exclusion criteria (Exposure)
WOS_2022	WOS	10.1016/j.biocon.2008.06.019	2008	Barrett, Kyle; Guyer, Craig	Differential responses of amphibians and reptiles in riparian and stream habitats to land use disturbances in western Georgia, USA	NA	Biological Conservation	The document meets exclusion criteria for waterways
WOS_2030	WOS	10.1007/s10531-008-9499-9	2009	Barrientos, R.; Bolonio, L.	The presence of rabbits adjacent to roads increases polecat road mortality	NA	Biodiversity and Conservation	The comparator is inappropriate
WOS_2032	WOS	10.1111/j.1472-4642.2011.00850.x	2012	Barrientos, Rafael; de Dios Miranda, Juan	Can we explain regional abundance and road-kill patterns with variables derived from local-scale road-kill models? Evaluating transferability with the European polecat	NA	Diversity and Distributions	The study type is inappropriate (no data, simulation, recommendation)
ACTU_ZR_T_397	ZR	NA	2017	Barros, Ana Barbara; Menezes, Frederico de Alcantara; Falconi, Jose Ricardo; Giovanelli, Joao Gabriel Ribeiro	Reptiles of forest remnants and agricultural fields on Cambuhy Farm, in the municipalities of Matao, Nova Europa, and Tabatinga, northwestern Sao Paulo, Brazil.	NA	NA	Language is not English or French
WOS_2063	WOS	10.1111/j.1600-0706.2009.18080.x	2010	Bartel, Rebecca A.; Haddad, Nick M.; Wright, Justin P.	Ecosystem engineers maintain a rare species of butterfly and increase plant diversity	NA	Oikos	The document meets exclusion criteria for waterways
WOS_2072	WOS	NA	2014	Bartha, Josif; Vlad, Lacramioara Mirela; Toma, Daniel; Toaca, Daniel; Cotiusca-Zauca, Dorin	REHABILITATION AND EXTENSION OF WETLANDS WITHIN FLOODPLAINS OF EMBANKED RIVERS	NA	Environmental Engineering and Management Journal	Sites are not in the bioclimatic region
WOS_2077	WOS	10.1007/s10531-014-0734-2	2014	Barthelmess, Erika L.	Spatial distribution of road-kills and factors influencing road mortality for mammals in Northern New York State	NA	Biodiversity and Conservation	Sites are not in the bioclimatic region
WOS_2089	WOS	10.3356/JRR-10-06.1	2010	Bartok, Nickolas D.; Conway, Courtney J.	FACTORS AFFECTING THE PRESENCE OF NESTING BURROWING OWLS IN AN AGRICULTURAL LANDSCAPE	NA	Journal of Raptor Research	Sites are not in the bioclimatic region
ZR_10630	ZR	NA	2015	Bartzke, G. S.; May, R.; Solberg, E. J.; Rolandsen, C. M.; Roskaft, E.	Differential barrier and corridor effects of power lines, roads and rivers on moose (Alces alces) movements.	NA	NA	Sites are not in the bioclimatic region
ACTU_WOS_T_10696	WOS	10.1890/ES14-00278.1	2015	Bartzke, GS; May, R; Solberg, EJ; Rolandsen, CM; Roskaft, E	Differential barrier and corridor effects of power lines, roads and rivers on moose (Alces alces) movements	NA	NA	Sites are not in the bioclimatic region
ZR_10631	ZR	NA	2014	Bartzke, Gundula S.; May, Roel; Bevanger, Kjetil; Stokke, Sigbjern; Roskaft, Eivin	The effects of power lines on ungulates and implications for power line routing and rights-of-way management.	NA	NA	The document is a review
ZR_609	ZR	10.2307/2403425	1984	Bas, N.; Jenkins, D.; Rothery, P.	Ecology of otters in northern Scotland. 5. The distribution of otter (Lutra lutra) faeces in relation to bankside vegetation on the River Dee in summer 1981.	NA	NA	The comparator is inappropriate
ZR_614	ZR	NA	2012	Bashir, Tawqir; Behera, Sandeep Kumar; Khan, Afifullah; Gautam, Parikshit	An inventory of mammals, birds and reptiles along a section of the river and banks of upper Ganges, India.	NA	NA	Sites are not in the bioclimatic region
ZR_623	ZR	NA	2007	Bataller, Ramon Prades; Raimundo, Ana Llopis; Ortiz Olmos, Jose Vicente	[The little ringed plover (Charadrius dubius) in Castellon. Distribution and nesting population. 4th provincial census 2007.]	NA	NA	Language is not English or French
WOS_2158	WOS	10.1016/j.jaridenv.2008.03.009	2008	Bateman, H. L.; Harner, M. J.; Chung-MacCoubrey, A.	Abundance and reproduction of toads (Bufo) along a regulated river in the southwestern United States: Importance of flooding in riparian ecosystems	NA	Journal of Arid Environments	Sites are not in the bioclimatic region
WOS_2159	WOS	10.1007/s10530-014-0707-0	2015	Bateman, H. L.; Merritt, D. M.; Glenn, E. P.; Nagler, P. L.	Indirect effects of biocontrol of an invasive riparian plant (Tamarix) alters habitat and reduces herpetofauna abundance	NA	Biological Invasions	Sites are not in the bioclimatic region
WOS_2161	WOS	10.1111/j.1469-1795.2011.00517.x	2012	Bateman, H. L.; Ostoja, S. M.	Invasive woody plants affect the composition of native lizard and small mammal communities in riparian woodlands	NA	Animal Conservation	Sites are not in the bioclimatic region
ZR_636	ZR	NA	2015	Bateman, H. L.; Stromberg, J. C.; Banville, M. J.; Makings, E.; Scott, B. D.; Suchy, A.; Wolkis, D.	Novel water sources restore plant and animal communities along an urban river.	NA	NA	Sites are not in the bioclimatic region
WOS_2162	WOS	10.1111/j.1526-100X.2007.00361.x	2008	Bateman, Heather L.; Chung-MacCoubrey, Alice; Snell, Howard L.	Impact of non-native plant removal on lizards in riparian habitats in the Southwestern United States	NA	Restoration Ecology	Sites are not in the bioclimatic region
WOS_2163	WOS	NA	2009	Bateman, Heather L.; Chung-MacCoubrey, Alice; Snell, Howard L.; Finch, Deborah M.	ABUNDANCE AND SPECIES RICHNESS OF SNAKES ALONG THE MIDDLE RIO GRANDE RIPARIAN FOREST IN NEW MEXICO	NA	Herpetological Conservation and Biology	Sites are not in the bioclimatic region
EM_35	GREY_LITT_email_request	NA	1997	Baudvin, Hugues	Barn Owl (Tyto alba) and Long-Eared Owl (Asio otus) Mortality Along Motorways in Bourgogne-Champagne: Report and Suggestions	NA	NA	The document does not dealt with our 6 specific questions
WOS_2233	WOS	10.1111/j.1523-1739.2004.00499.x	2004	Bautista, L. M.; Garcia, J. T.; Calmaestra, R. G.; Palacin, C.; Martin, C. A.; Morales, M. B.; Bonal, R.; Vinuela, J.	Effect of weekend road traffic on the use of space by raptors	NA	Conservation Biology	Sampling points are not on verges (exposure)
WOS_2259	WOS	10.1007/s10980-004-2265-9	2005	Bayne, E. M.; Van Wilgenburg, S. L.; Boutin, S.; Hobson, K. A.	Modeling and field-testing of Ovenbird (Seiurus aurocapillus) responses to boreal forest dissection by energy sector development at multiple spatial scales	NA	Landscape Ecology	Sites are not in the bioclimatic region
ACTU_WOS_T_6951	WOS	10.1650/CONDOR-15-126.1	2016	Bayne, E; Leston, L; Mahon, CL; Solymos, P; Machtans, C; Lankau, H; Ball, JR; Van Wilgenburg, SL; Cumming, SG; Fontaine, T; Schmiegelow, FKA; Song, SJ	Boreal bird abundance estimates within different energy sector disturbances vary with point count radius	NA	NA	Sites are not in the bioclimatic region
WOS_2295	WOS	10.1139/cjz-2013-0225	2014	Beatty, William S.; Beasley, James C.; Rhodes, Olin E.	Habitat selection by a generalist mesopredator near its historical range boundary	NA	Canadian Journal of Zoology	Sites are not in the bioclimatic region
WOS_2315	WOS	NA	1997	Beaver, D. L.; Roth, J. J.	Winter survey of raptors with notes on avian scavengers in northwestern Colorado	NA	Great Basin Naturalist	Sites are not in the bioclimatic region
ZR_10700	ZR	NA	1990	Bechard, M. J.; Knight, R. L.; Smith, D. G.; Fitzner, R. E.	Nest sites and habitats of sympatric hawks (Buteo spp.) in Washington.	NA	NA	Results are in an unexploitable format
WOS_2338	WOS	10.2111/REM-D-12-00141.1	2014	Beck, Jeffrey L.; Booth, D. Terrance; Kennedy, Carmen L.	Assessing Greater Sage-Grouse Breeding Habitat With Aerial and Ground Imagery	NA	Rangeland Ecology & Management	Sites are not in the bioclimatic region
WOS_2341	WOS	NA	2013	Beck, Jeffrey L.; Smith, Kurt T.; Flinders, Jerran T.; Clyde, Craig L.	SEASONAL HABITAT SELECTION BY ELK IN NORTH CENTRAL UTAH	NA	Western North American Naturalist	Sites are not in the bioclimatic region
ZR_679	ZR	NA	1987	Becker, D. M.; Hull Sieg, C.	Home range and habitat utilization of breeding male merlins, Falco columbarius, in southeastern Montana.	NA	NA	Sites are not in the bioclimatic region
WOS_2354	WOS	10.1023/B:EMAS.0000016801.38603.b3	2004	Becker, J. M.; McKinstry, C. A.	Response of winter birds to soil remediation along the Columbia River at the Hanford Site	NA	Environmental Monitoring and Assessment	Sites are not in the bioclimatic region
ACTU_WOS_T_7208	WOS	10.1016/j.gecco.2016.02.001	2016	Beckmann, JP; Olson, SH; Seidler, RG; Berger, J	Sub-lethal effects of energy development on a migratory mammal-The enigma of North American pronghorn	NA	NA	Sites are not in the bioclimatic region
WOS_2364	WOS	NA	2002	Bedard, Y.; Trottler, D.; Belanger, L.; Bourassa, J. P.; Champagne, N.; Gerin-Lajoie, J.; Lacroix, G.; Levesque, E.	Managing the rights-of-way green heritage of highways in Southern Quebec: A new ecological landscape approach	NA	NA	Pdf cannot be obtained (and sites are not in the temperate bioclimatic region)
ZR_686	ZR	NA	2009	Bedford, Susannah J.	The effects of riparian habitat quality and biological water quality on the European otter (Lutra lutra) in Devon.	NA	NA	The document meets previous screening exclusion criteria (Outcome)
ZR_10717	ZR	NA	2000	Bednorz, Jan	Ravens Corvus corax Linnaeus, 1758, nesting on electricity pylons in the Wielkopolska region.	NA	NA	There is no comparator
WOS_2387	WOS	10.1371/journal.pone.0078510	2013	Beguin, Julien; McIntire, Eliot J. B.; Fortin, Daniel; Cumming, Steven G.; Raulier, Frederic; Racine, Pierre; Dussault, Claude	Explaining Geographic Gradients in Winter Selection of Landscapes by Boreal Caribou with Implications under Global Changes in Eastern Canada	NA	Plos One	Sites are not in the bioclimatic region
WOS_2403	WOS	10.2307/3808935	1995	BEIER, P.	DISPERSAL OF JUVENILE COUGARS IN FRAGMENTED HABITAT	NA	Journal of Wildlife Management	The document meets previous screening exclusion criteria (Exposure)
WOS_2418	WOS	10.1111/j.1365-2028.2008.00956.x	2008	Bekhuis, Patricia D. B. M.; De Jong, Christine B.; Prins, Herbert H. T.	Diet selection and density estimates of forest buffalo in Campo-Ma'an National Park, Cameroon	NA	African Journal of Ecology	Sites are not in the bioclimatic region
ZR_702	ZR	NA	1998	Bekker, J. P.; Mostert, K.	Bank voles Clethrionomys glareolus invading the peninsula Zuid-Beveland/Walcheren, province of Zeeland, the Netherlands.	NA	NA	Pdf cannot be obtained
ZR_10734	ZR	NA	2006	Belant, Jerrold L.; Paynter, Jonathan A.; Stahlnecker, Kenneth E.; Van Ballenberghe, Victor	Moose distribution relative to human development in a national park.	NA	NA	Sites are not in the bioclimatic region
WOS_2440	WOS	NA	2002	Belisle, F.; Doucet, G. J.; Garant, Y.	Wildlife use of riparian vegetation buffer zones in high voltage powerline rights-of-way in the Quebec Boreal Forest	NA	NA	Pdf cannot be obtained
ZR_10741	ZR	NA	1982	Bell, H. L.	A bird community of lowland rainforest in New Guinea. 4. Birds of secondary vegetation.	NA	NA	Sites are not in the bioclimatic region
WOS_2449	WOS	NA	1992	BELL, JH; LAUER, JL; PEEK, JM	HABITAT USE PATTERNS OF WHITE-TAILED DEER, UMATILLA RIVER, OREGON	NA	Northwest Science	Sampling points are not on verges (exposure)
ACTU_WOS_T_10127	WOS	10.1016/j.foreco.2015.03.047	2015	Bellis, LM; Pidgeon, AM; Alcantara, C; Dardanelli, S; Radeloff, VC	Influences of succession and erosion on bird communities in a South American highland wooded landscape	NA	NA	Sites are not in the bioclimatic region
ACTU_WOS_F_1244	WOS	10.1002/eap.1486	2017	Bellmore, JR; Benjamin, JR; Newsom, M; Bountry, JA; Dombroski, D	Incorporating food web dynamics into ecological restoration: a modeling approach for river ecosystems	NA	NA	The study type is inappropriate (no data, simulation, recommendation)
WOS_2485	WOS	NA	2012	Belotti, E.; Heurich, M.; Kreisinger, J.; Sustr, P.; Bufka, L.	Influence of tourism and traffic on the Eurasian lynx hunting activity and daily movements	NA	Animal Biodiversity and Conservation	The comparator is inappropriate
WOS_2496	WOS	NA	2002	Belthoff, J. R.; King, R. A.	Nest-site characteristics of Burrowing Owls (Athene cunicularia) in the Snake River Birds of Prey National Conservation Area, Idaho, and applications to artificial burrow installation	NA	Western North American Naturalist	Sites are not in the bioclimatic region
WOS_2533	WOS	NA	1999	Benedict, R. A.; Druecker, J. D.; Genoways, H. H.	New records and habitat information for Sorex merriami in Nebraska	NA	Great Basin Naturalist	Sites are not in the bioclimatic region
ZR_10767	ZR	10.1656/1528-7092(2004)003[0371:DBAACO]2.0.CO;2	2004	Benedict, Russell A.; Billeter, Mary C.	Discarded bottles as a cause of mortality in small vertebrates.	NA	NA	The comparator is inappropriate
WOS_2550	WOS	10.1016/j.biocon.2010.02.009	2010	Benitez-Lopez, Ana; Alkemade, Rob; Verweij, Pita A.	The impacts of roads and other infrastructure on mammal and bird populations: A meta-analysis	NA	Biological Conservation	The document is a review
WOS_2552	WOS	10.1007/s00442-011-2000-6	2011	Benjamin, Joseph R.; Fausch, Kurt D.; Baxter, Colden V.	Species replacement by a nonnative salmonid alters ecosystem function by reducing prey subsidies that support riparian spiders	NA	Oecologia	Sites are not in the bioclimatic region
WOS_2564	WOS	10.1111/1365-2664.12200	2014	Bennett, Andrew F.; Nimmo, Dale G.; Radford, James Q.	Riparian vegetation has disproportionate benefits for landscape- scale conservation of woodland birds in highly modified environments	NA	Journal of Applied Ecology	Results are in an unexploitable format
WOS_2578	WOS	10.1002/jwmg.467	2013	Bennett, Victoria J.; Zurcher, Arthur A.	When corridors collide: Road-related disturbance in commuting bats	NA	Journal of Wildlife Management	The document meets previous screening exclusion criteria (Exposure)
WOS_2592	WOS	10.2193/2006-412	2007	Benson, Thomas J.; Dinsmore, James J.; Hohman, William L.	Responses of plants and arthropods to burning and disking of riparian habitats	NA	Journal of Wildlife Management	Sites are not in the bioclimatic region
WOS_2591	WOS	NA	2011	Benson, Thomas J.; Dinsmore, James J.; Hohman, William L.	Short-term Effects of Burning and Disking on Songbird Use of Floodplain Conservation Easements	NA	American Midland Naturalist	Sites are not in the bioclimatic region
ZR_739	ZR	NA	1998	Benstead, Phil J.; Jeffs, Catherine J. S.; Hearn, Richard D.	Riparian bird densities along four tributaries of the Rio Parana in north-east Argentina.	NA	NA	The comparator is inappropriate
WOS_2599	WOS	10.1046/j.1523-1739.1997.96100.x	1997	Bentley, J. M.; Catterall, C. P.	The use of bushland, corridors, and linear remnants by birds in southeastern Queensland, Australia	NA	Conservation Biology	The document meets previous screening exclusion criteria (Exposure)
ACTU_ZR_T_226	ZR	NA	2017	Bentzen, Rebecca; Dinsmore, Stephen; Liebezeit, Joseph; Robards, Martin; Streever, Bill; Zack, Steve	Assessing development impacts on Arctic nesting birds using real and artificial nests.	NA	NA	Sites are not in the bioclimatic region
ZR_10805	ZR	NA	2009	Beraudo, Pier Luigi; Toffoli, Roberto	Expansion of peregrine falcon, Falco peregrinus, in the province of Cuneo (Piedmont - northern Italy) and breeding ecology in extra-alpine area.	NA	NA	Language is not English or French
ACTU_WOS_F_3730	WOS	10.1016/j.rmb.2015.04.003	2015	Berduc, A; Lorenzon, RE; Beltzer, AH	Bird diversity patterns along a latitudinal gradient of riparian forests from Middle Parana River, Argentina	NA	NA	Language is not English or French
WOS_2624	WOS	10.2307/1942054	1995	BERG, DR	RIPARIAN SILVICULTURAL SYSTEM-DESIGN AND ASSESSMENT IN THE PACIFIC-NORTHWEST CASCADE MOUNTAINS, USA	NA	Ecological Applications	The document meets previous screening exclusion criteria (Outcome)
ZR_10814	ZR	NA	1987	Berger, F.	Contribution a l'etude du role des haies pour la perdrix rouge (Alectoris rufa).	NA	NA	Pdf cannot be obtained
WOS_2643	WOS	10.1007/s10457-009-9270-6	2010	Berges, Sara A.; Moore, Lisa A. Schulte; Isenhart, Thomas M.; Schultz, Richard C.	Bird species diversity in riparian buffers, row crop fields, and grazed pastures within agriculturally dominated watersheds	NA	Agroforestry Systems	Sites are not in the bioclimatic region
WOS_2648	WOS	NA	1997	Bergin, T. M.; Best, L. B.; Freemark, K. E.	An experimental study of predation on artificial nests in roadsides adjacent to agricultural habitats in Iowa	NA	Wilson Bulletin	Sites are not in the bioclimatic region
WOS_2649	WOS	10.1023/A:1008112825655	2000	Bergin, T. M.; Best, L. B.; Freemark, K. E.; Koehler, K. J.	Effects of landscape structure on nest predation in roadsides of a midwestern agroecosystem: a multiscale analysis	NA	Landscape Ecology	Sites are not in the bioclimatic region
ACTU_WOS_F_946	WOS	NA	2017	Bernardo, AA	Importance of riparian forest in enhancing the avifaunal diversity of upland agricultural	NA	NA	Sites are not in the bioclimatic region
ACTU_WOS_T_5416	WOS	10.1016/j.biocon.2016.11.002	2016	Bernath-Plaisted, J; Koper, N	Physical footprint of oil and gas infrastructure, not anthropogenic noise, reduces nesting success of some grassland songbirds	NA	NA	Sites are not in the bioclimatic region
ACTU_WOS_T_2634	WOS	10.1098/rsos.170036	2017	Bernath-Plaisted, J; Nenninger, H; Koper, N	Conventional oil and natural gas infrastructure increases brown-headed cowbird (Molothrus ater) relative abundance and parasitism in mixed-grass prairie	NA	NA	Sites are not in the bioclimatic region
WOS_2717	WOS	10.1111/j.1365-2664.2011.02068.x	2012	Berthinussen, Anna; Altringham, John	The effect of a major road on bat activity and diversity	NA	Journal of Applied Ecology	The comparator is inappropriate
WOS_2742	WOS	10.1890/02-5175	2003	Beschta, R. L.	Cottonwoods, elk, and wolves in the Lamar Valley of Yellowstone National Park	NA	Ecological Applications	Sites are not in the bioclimatic region
WOS_2743	WOS	10.1890/04-0964	2005	Beschta, R. L.	Reduced cottonwood recruitment following extirpation of wolves in Yellowstone's northern range	NA	Ecology	Sites are not in the bioclimatic region
ACTU_WOS_F_2382	WOS	10.1016/j.biocon.2016.03.031	2016	Beschta, RL; Ripple, WJ	Riparian vegetation recovery in Yellowstone: The first two decades after wolf reintroduction	NA	NA	Sites are not in the bioclimatic region
WOS_2748	WOS	10.1111/j.1526-100X.2008.00450.x	2010	Beschta, Robert L.; Ripple, William J.	Recovering Riparian Plant Communities with Wolves in Northern Yellowstone, USA	NA	Restoration Ecology	Sites are not in the bioclimatic region
WOS_2747	WOS	10.1002/eco.1487	2015	Beschta, Robert L.; Ripple, William J.	Divergent patterns of riparian cottonwood recovery after the return of wolves in Yellowstone, USA	NA	Ecohydrology	Sites are not in the bioclimatic region
EM_48	GREY_LITT_email_request	NA	2011	Beslot, Édouard	Gestion différenciée des bords de routes de Maine-et-Loire - Suivi de terrain, 2e année	NA	NA	There is no comparator
EM_49	GREY_LITT_email_request	NA	2012	Beslot, Édouard	Gestion différenciée des bords de routes de Maine-et-Loire - Suivi de terrain, 3e année	NA	NA	There is no comparator
WOS_2756	WOS	10.2307/2426479	1995	BEST, LB; FREEMARK, KE; DINSMORE, JJ; CAMP, M.	A REVIEW AND SYNTHESIS OF HABITAT USE BY BREEDING BIRDS IN AGRICULTURAL LANDSCAPES OF IOWA	NA	American Midland Naturalist	The document is a review
ZR_10850	ZR	NA	2004	Bevanger, K.; Broseth, H.	Impact of power lines on bird mortality in a subalpine area.	NA	NA	Sites are not in the bioclimatic region
ACTU_GREY_LITT_193	GREY_LITT_BASE	NA	2017	Bevanger, Kjetil Modolv; Bartzke, Gundula; Brøseth, Henrik; Dahl, Espen Lie; Gjershaug, Jan Ove; Hanssen, Frank Ole; Jacobsen, Karl-Otto; Kvaløy, Pål; May, Roelof Frans; Meås, Roger; Nygård, Torgeir; Refsnæs, Steinar; Stokke, Sigbjørn; Thomassen, Jørn	Optimal design and routing of power lines; ecological, technical and economic perspectives (OPTIPOL). Progress Report 2011	NA	NA	Results are in an unexploitable format
ZR_801	ZR	NA	2012	Bhattarai, Bishnu Prasad	Distribution and Diversity of Storks in the Adjoining Areas of Chitwan National Park, Nepal.	NA	NA	Sites are not in the bioclimatic region
ZR_10868	ZR	NA	2006	Biadun, Waldemar	Sparrowhawk - a new breeding species in the Polish towns?	NA	NA	Sites are not in the bioclimatic region
ZR_10872	ZR	NA	2014	Biancardi, Carlo M.; Rigo, Valentina; Azzolini, Sonia; Gnoli, Claudio	Eurasian badger (Meles meles) habitat and sett site selection in the northern Apennines.	NA	NA	Sampling points are not on verges (exposure)
ACTU_WOS_F_2182	WOS	10.1002/aqc.2612	2016	Biffi, M; Charbonnel, A; Buisson, L; Blanc, F; Nemoz, M; Laffaille, P	Spatial differences across the French Pyrenees in the use of local habitat by the endangered semi-aquatic Pyrenean desman (Galemys pyrenaicus)	NA	NA	The document meets previous screening exclusion criteria (Exposure)
ZR_10903	ZR	NA	2001	Biondi, Massimo	The breeding community of a gravel-sand pit near Rome.	NA	NA	Pdf cannot be obtained
EM_518	GREY_LITT_email_request	NA	2014	Biotope	Etude des réseaux écologiques sur le territoire de la Ville de Lille et des communes associées de Lomme et Hellemmes	NA	NA	The study type is inappropriate (no data, simulation, recommendation)
ZR_10905	ZR	10.1016/0143-1471(86)90098-X	1986	Birdsall, C. W.; Grue, C. E.; Anderson, A.	Lead concentrations in bullfrog Rana catesbeiana and green frog R. clamitans tadpoles inhabiting highway drainages.	NA	NA	The document meets previous screening exclusion criteria (Outcome)
ZR_10906	ZR	NA	1994	Birkan, M.; Avignon, T.; Reitz, F.; Vignon, V.	Influence d'une autoroute sur le succes reproducteur de la perdix grise (Perdix perdix) en plaine de grande culture.	NA	NA	Pdf cannot be obtained
ZR_835	ZR	NA	2010	Birx-Raybuck, Devynn A.; Price, Steven J.; Dorcas, Michael E.	Pond age and riparian zone proximity influence anuran occupancy of urban retention ponds.	NA	NA	The document meets exclusion criteria for waterways
WOS_2963	WOS	10.1111/j.1469-7998.2007.00337.x	2007	Biscardi, S.; Russo, D.; Casciani, V.; Cesarini, D.; Mei, M.; Boitani, L.	Foraging requirements of the endangered long-fingered bat: the influence of micro-habitat structure, water quality and prey type	NA	Journal of Zoology	The comparator is inappropriate
WOS_2968	WOS	NA	2000	Bishop, C. A.; Struger, J.; Shirose, L. J.; Dunn, L.; Campbell, G. D.	Contamination and wildlife communities in stormwater detention ponds in Guelph and the Greater Toronto Area, Ontario, 1997 and 1998. Part II - Contamination and biological effects of contamination	NA	Water Quality Research Journal of Canada	Sites are not in the bioclimatic region
ZR_841	ZR	NA	1998	Bishop, Mary A.; Zhouma, Canjue; Yanling, Song; Harkness, Jim; Binyuan, Gu	Winter habitat use by black-necked cranes Grus nigricollis in Tibet.	NA	NA	Sites are not in the bioclimatic region
EM_59	GREY_LITT_email_request	NA	2003	Bizet, Daniel; Geng, Matthieu	Suivi complémentaire sur l’Outarde canepetière à proximité des lignes ferroviaires en Costières du Gard.	NA	NA	Sampling points are not on verges (exposure)
WOS_3003	WOS	NA	1996	Bjorge, R. R.; Prescott, D. R. C.	Population estimate and habitat associations of the Loggerhead Shrike, Lanius ludovicianus, in southeastern Alberta	NA	Canadian Field-Naturalist	Sites are not in the bioclimatic region
ZR_854	ZR	10.2307/3801580	1988	Blakesley, J. A.; Reese, K. P.	Avian use of campground and noncampground sites in riparian zones.	NA	NA	Sites are not in the bioclimatic region
ACTU_WOS_F_625	WOS	10.1016/j.biocon.2017.08.030	2017	Blakey, RV; Kingsford, RT; Law, BS; Stoklosa, J	Floodplain habitat is disproportionately important for bats in a large river basin	NA	NA	The document meets previous screening exclusion criteria (Exposure)
ACTU_WOS_F_947	WOS	10.15446/caldasia.v39n2.63489	2017	Blanco-Torres, A; Bastidas-Molina, B; Parra-Torres, F	Spatial and temporal variation of the herpetofauna in floodable savannas ecosystems of Orinoquia-Colombia	NA	NA	Language is not English or French
ACTU_WOS_F_3165	WOS	NA	2015	Bliss, M; Cecala, KK	DOES HABITAT DISTURBANCE AFFECT THE BEHAVIORS OF APPALACHIAN STREAM SALAMANDERS?	NA	NA	The document meets exclusion criteria for waterways
ZR_10954	ZR	NA	2014	Bo, Li; Xi, Za; Yong-wang, Guo; Zheng-gang, Xu; Jian, Chen; Sang-da-wa, Luo; Peng, Zhang; Guo, Shen; Xun-jun, Zhou; Mei-wen, Zhang; Yong, Wang	Investigation of community structure of rodents in Naqu grassland along Qinghai-Tibet Railway, Tibet, China.	NA	NA	Language is not English or French
WOS_3143	WOS	10.1016/j.jaridenv.2005.06.020	2006	Boarman, W. I.; Sazaki, M.	A highway's road-effect zone for desert tortoises (Gopherus agassizii)	NA	Journal of Arid Environments	Sites are not in the bioclimatic region
WOS_3144	WOS	10.1016/j.mambio.2009.02.006	2009	Boas Goulart, Fernando Vilas; Caceres, Nilton Carlos; Graipel, Mauricio Eduardo; Tortato, Marcos Adriano; Ghizoni, Ivo Rohling; Rodrigues Oliveira-Santos, Luiz Gustavo	Habitat selection by large mammals in a southern Brazilian Atlantic Forest	NA	Mammalian Biology	The comparator is inappropriate
WOS_3150	WOS	10.3356/JRR-13-54.1	2014	Bobowski, Melissa M.; Rolland, Virginie; Risch, Thomas S.	ABUNDANCE AND DISTRIBUTION OF OVERWINTERING RED-TAILED HAWKS AND AMERICAN KESTRELS IN AN AGRICULTURAL LANDSCAPE IN NORTHEASTERN ARKANSAS	NA	Journal of Raptor Research	The comparator is inappropriate
WOS_3166	WOS	10.1086/285442	1992	BOCK, CE; CRUZ, A.; GRANT, MC; AID, CS; STRONG, TR	FIELD EXPERIMENTAL-EVIDENCE FOR DIFFUSE COMPETITION AMONG SOUTHWESTERN RIPARIAN BIRDS	NA	American Naturalist	Sites are not in the bioclimatic region
WOS_3174	WOS	10.1006/jema.2001.0454	2001	Bodie, J. R.	Stream and riparian management for freshwater turtles	NA	Journal of Environmental Management	The document is a review
WOS_3203	WOS	NA	2013	Bogdan, Horia Vlad; Ilies, Dorina; Gaceu, Ovidiu	Conservation implications on present distribution of herpetofauna from plain areas of the Western Banat region, Romania	NA	North-Western Journal of Zoology	The document meets previous screening exclusion criteria (Outcome)
ZR_903	ZR	NA	2011	Bohus, Mirko	Census of wintering White-tailed Sea Eagles in Slovak section of the Danube river in winters 2008/2009 - 2010/2011.	NA	NA	Language is not English or French
WOS_3252	WOS	10.1642/0004-8038(2004)121[0767:RONBDO]2.0.CO;2	2004	Bollinger, E. K.; Gavin, T. A.	Responses of nesting bobolinks (Dolichonyx oryzivorus) to habitat edges	NA	Auk	Sites are not in the bioclimatic region
WOS_3262	WOS	NA	2003	Bombay, H. L.; Morrison, M. L.; Hall, L. S.	Scale perspectives in habitat selection and animal performance for Willow Flycatchers (Empidonax traillii) in the central Sierra Nevada, California	NA	NA	The document meets exclusion criteria for waterways
WOS_3272	WOS	10.1111/j.1744-7429.2006.00251.x	2007	Bonaccorso, Frank J.; Winkelmann, John R.; Shin, Danny; Agrawal, Caroline I.; Aslami, Nadia; Bonney, Caitlin; Hsu, Andrea; Jekielek, Phoebe E.; Knox, Allison K.; Kopach, Stephen J.; Jennings, Tara D.; Lasky, Jesse R.; Menesale, Sarah A.; Richards, Jeannine H.; Rutland, Jessica A.; Sessa, Anna K.; Zhaurova, Luba; Kunz, Thomas H.	Evidence for exploitative competition: Comparative foraging behavior and roosting ecology of short-tailed fruit bats (Phyllostomidae)	NA	Biotropica	Sites are not in the bioclimatic region
WOS_3273	WOS	10.3161/150811014X683255	2014	Bonaccorso, Frank J.; Winkelmann, John R.; Todd, Christopher M.; Miles, Adam C.	Foraging movements of epauletted fruit bats (Pteropodidae) in relation to the distribution of sycamore figs (Moraceae) in Kruger National Park, South Africa	NA	Acta Chiropterologica	Sites are not in the bioclimatic region
WOS_3282	WOS	10.1515/mamm.1992.56.3.407	1992	BONAVENTURA, SM; KRAVETZ, FO; SUAREZ, OV	THE RELATIONSHIP BETWEEN FOOD AVAILABILITY, SPACE USE AND TERRITORIALITY	NA	Mammalia	The comparator is inappropriate
ACTU_WOS_F_2128	WOS	10.1002/jwmg.21112	2016	Bond, ML; Bradley, C; Lee, DE	Foraging habitat selection by California spotted owls after fire	NA	NA	The document meets previous screening exclusion criteria (Exposure)
WOS_3292	WOS	10.1111/j.0030-1299.2004.13034.x	2004	Bonesi, L.; Macdonald, D. W.	Differential habitat use promotes sustainable coexistence between the specialist otter and the generalist mink	NA	Oikos	The comparator is inappropriate
ZR_947	ZR	NA	1985	Books, G. G.	Avian interactions with mid-Columbia River water level fluctuations.	NA	NA	Sites are not in the bioclimatic region
ZR_948	ZR	NA	2011	Boonman, Martijn	Factors determining the use of culverts underneath highways and railway tracks by bats in lowland areas.	NA	NA	The document meets previous screening exclusion criteria (Exposure)
WOS_3353	WOS	NA	2013	Borchard, P.	USING CAMERA - TRAP DATA TO MODEL HABITAT USE BY WOMBATS AND CATTLE IN AUSTRALIAN RIPARIAN ECOSYSTEMS	NA	Applied Ecology and Environmental Research	The document meets exclusion criteria for waterways
WOS_3355	WOS	10.1016/j.geomorph.2011.04.021	2011	Borchard, Philip; Eldridge, David J.	The geomorphic signature of bare-nosed wombats (Vombatus ursinus) and cattle (Bos taurus) in an agricultural riparian ecosystem	NA	Geomorphology	The document meets previous screening exclusion criteria (Outcome)
WOS_3354	WOS	10.1071/ZO13063	2013	Borchard, Philip; Eldridge, David J.	Does artificial light influence the activity of vertebrates beneath rural buildings?	NA	Australian Journal of Zoology	The document meets previous screening exclusion criteria (Exposure)
WOS_3357	WOS	10.1071/WR08071	2008	Borchard, Philip; Mcllroy, John; McArthur, Clare	Links between riparian characteristics and the abundance of common wombat (Vombatus ursinus) burrows in an agricultural landscape	NA	Wildlife Research	The document meets exclusion criteria for waterways
WOS_3358	WOS	10.1071/ZO09060	2009	Borchard, Philip; Wright, Ian A.; McArthur, Clare	Do bare-nosed wombat (Vombatus ursinus) mounds influence terrestrial macroinvertebrate assemblages in agricultural riparian zones?	NA	Australian Journal of Zoology	The document meets exclusion criteria for waterways
ACTU_WOS_F_3046	WOS	10.1111/btp.12296	2016	Borges, SH; Cornelius, C; Moreira, M; Ribas, CC; Conh-Haft, M; Capurucho, JM; Vargas, C; Almeida, R	Bird Communities in Amazonian White-Sand Vegetation Patches: Effects of Landscape Configuration and Biogeographic Context	NA	NA	Sites are not in the bioclimatic region
WOS_3375	WOS	10.1890/03-5129	2004	Borgmann, K. L.; Rodewald, A. D.	Nest predation in an urbanizing landscape: The role of exotic shrubs	NA	Ecological Applications	Results are in an unexploitable format
WOS_3376	WOS	10.2307/3803233	2000	Borgnia, M.; Galante, M. L.; Cassini, M. H.	Diet of the coypu (Nutria, Myocastor coypus) in agro-systems of Argentinean pampas	NA	Journal of Wildlife Management	The document meets previous screening exclusion criteria (Outcome)
ACTU_ZR_T_800	ZR	NA	2016	Bortolamiol, Sarah; Cohen, Marianne; Jiguet, Frederic; Pennec, Flora; Seguya, Andrew; Krief, Sabrina	Chimpanzee Non-Avoidance of Hyper-Proximity to Humans.	NA	NA	Sites are not in the bioclimatic region
WOS_3411	WOS	NA	1996	Bosakowski, T.; Ramsey, R. D.; Smith, D. G.	Habitat and spatial relationships of nesting Swainson's hawks (Buteo swainsoni) and red-tailed hawks (B-jamaicensis) in northern Utah	NA	Great Basin Naturalist	Sites are not in the bioclimatic region
WOS_3412	WOS	NA	1992	BOSAKOWSKI, T.; SMITH, DG; SPEISER, R.	NEST SITES AND HABITAT SELECTED BY COOPER HAWKS, ACCIPITER-COOPERII, IN NORTHERN NEW-JERSEY AND SOUTHEASTERN NEW-YORK	NA	Canadian Field-Naturalist	The comparator is inappropriate
ZR_11042	ZR	NA	2006	Bosakowski, Thomas; Smith, Dwight G.	Ecology of the Northern Goshawk in the New York-New Jersey Highlands.	NA	NA	Pdf cannot be obtained
WOS_3415	WOS	NA	2005	Bosch, J.; Borras, A.; Freixas, J.	Nesting habitat selection of booted eagle Hieraaetus pennatus in Central Catalonia	NA	Ardeola	Sampling points are not on verges (exposure)
WOS_3426	WOS	10.1577/M05-060.1	2006	Bosworth, Aaron; Farrell, John M.	Genetic divergence among northern pike from spawning locations in the upper St. Lawrence River	NA	North American Journal of Fisheries Management	Sites are not in the bioclimatic region
WOS_3443	WOS	NA	1994	BOTTERWEG, J.; KERHOFS, MJJ	BARRIERS FOR ECOLOGICAL REHABILITATION OF THE RIVER MEUSE IN THE NETHERLANDS	NA	Water Science and Technology	The study type is inappropriate (no data, simulation, recommendation)
WOS_3451	WOS	NA	2009	Bouchard, Julie; Ford, Adam T.; Eigenbrod, Felix E.; Fahrig, Lenore	Behavioral Responses of Northern Leopard Frogs (Rana pipiens) to Roads and Traffic: Implications for Population Persistence	NA	Ecology and Society	Sites are not in the bioclimatic region
WOS_3455	WOS	NA	2003	Boucher, P. E.; Stoleson, S. H.; Shook, R. S.; Pope, R. D.; Monzingo, J.	Riparian restoration on the Gila River, New Mexico, creates breeding habitat for Southwestern Willow Flycatchers	NA	NA	Sites are not in the bioclimatic region
WOS_3478	WOS	NA	2000	Boulet, M.; Darveau, M.	Depredation of artificial bird nests along roads, rivers, and lakes in a boreal Balsam Fir, Abies balsamea, forest	NA	Canadian Field-Naturalist	Sites are not in the bioclimatic region
ZR_11061	ZR	NA	1982	Bourquin, J.-D.; Meylan, A.	Les peuplements de micromammiferes le long des autoroutes: inventaire faunistique et exemples d'occupation par Microtus arvalis (Pallas).	NA	NA	The comparator is inappropriate
ACTU_WOS_T_9506	WOS	10.1016/j.biocon.2015.07.007	2015	Bouyer, Y; Martin, GS; Poncin, P; Beudels-Jamar, RC; Odden, J; Linnell, JDC	Eurasian lynx habitat selection in human-modified landscape in Norway: Effects of different human habitat modifications and behavioral states	NA	NA	The document meets previous screening exclusion criteria (Exposure)
WOS_3518	WOS	10.1016/S0925-8574(99)00076-2	2000	Bowers, C. F.; Hanlin, H. G.; Guynn, D. C.; McLendon, J. P.; Davis, J. R.	Herpetofaunal and vegetational characterization of a thermally-impacted stream at the beginning of restoration	NA	Ecological Engineering	The document meets exclusion criteria for waterways
ZR_1032	ZR	10.2478/v10100-010-0004-7	2010	Bozic, Luka; Denac, Damijan	Abundance and distribution of selected breeding river-bed birds on the Drava River between Maribor and Sredisce ob Dravi (NE Slovenia) in 2006 and 2009, and causes of the reduction of their populations.	NA	NA	Language is not English or French
WOS_3572	WOS	10.1007/s10661-006-9467-3	2007	Braccia, Amy; Voshell, J. Reese	Benthic macroinvertebrate responses to increasing levels of cattle grazing in Blue Ridge Mountain streams, Virginia, USA	NA	Environmental Monitoring and Assessment	The document meets exclusion criteria for waterways
WOS_3573	WOS	10.1644/05-MAMM-A-098R1.1	2006	Brack, V.; LaVal, R. K.	Diet of the gray myotis (Myotis grisescens): Variability and consistency, opportunism and selectivity	NA	Journal of Mammalogy	The document meets previous screening exclusion criteria (Outcome)
WOS_3574	WOS	NA	2001	Brack, V.; Whitaker, J. O.	Foods of the northern myotis, Myotis septentrionalis, from Missouri and Indiana, with notes on foraging	NA	Acta Chiropterologica	The document meets exclusion criteria for waterways
WOS_3575	WOS	10.1656/1092-6194(2006)13[421:AAOMSI]2.0.CO;2	2006	Brack, Virgil	Autumn activity of Myotis sodalis (Indiana bat) in Bland County, Virginia	NA	Northeastern Naturalist	The document meets previous screening exclusion criteria (Exposure)
ZR_1040	ZR	NA	2009	Brack, Virgil	Summer bats of Potter and McKean Counties, Pennsylvania and adjacent Cattaraugus County, New York.	NA	NA	Sites are not in the bioclimatic region
ZR_1041	ZR	NA	2004	Brack, Virgil Jr; Whitaker, John O. Jr; Pruitt, Scott E.	Bats of Hoosier National Forest.	NA	NA	The comparator is inappropriate
WOS_3581	WOS	NA	1999	Braden, G. T.	Does nest placement affect the fate or productivity of California Gnatcatcher nests?	NA	Auk	The document meets previous screening exclusion criteria (Exposure)
WOS_3583	WOS	10.1890/0012-9658(2003)084[1012:HPOBTB]2.0.CO;2	2003	Bradford, D. F.; Neale, A. C.; Nash, M. S.; Sada, D. W.; Jaeger, J. R.	Habitat patch occupancy by toads (Bufo punctatus) in a naturally fragmented desert landscape	NA	Ecology	Sites are not in the bioclimatic region
ZR_11092	ZR	10.2307/3899388	1988	Bradley, L. C.; Fagre, D. B.	Coyote and bobcat responses to integrated ranch management practices in south Texas.	NA	NA	Results are in an unexploitable format
ACTU_WOS_F_802	WOS	10.1016/j.biocon.2017.06.039	2017	Bradsworth, N; White, JG; Isaac, B; Cooke, R	Species distribution models derived from citizen science data predict the fine scale movements of owls in an urbanizing landscape	NA	NA	The study type is inappropriate (no data, simulation, recommendation)
WOS_3600	WOS	10.1038/srep00235	2012	Brady, Steven P.	Road to evolution? Local adaptation to road adjacency in an amphibian (Ambystoma maculatum)	NA	Scientific Reports	Sites are not in the bioclimatic region
ACTU_WOS_T_9781	WOS	10.1093/jmammal/gyv094	2015	Braga, CAD; Prevedello, JA; Pires, MRS	Effects of cornfields on small mammal communities: a test in the Atlantic Forest hotspot	NA	NA	Sites are not in the bioclimatic region
WOS_3614	WOS	NA	2009	Braioni, M. G.; Villani, M. C.; Braioni, A.; Salmoiraghi, G.; Locascio, A.; Cannata, G.	The restoration of some stretches of the Sarno River (Southern Italy): from canalized environment to fluvial corridor	NA	River Basin Management V	The study type is inappropriate (no data, simulation, recommendation)
WOS_3616	WOS	10.1071/WR9960001	1996	Braithwaite, R. W.; Griffiths, A. D.	The paradox of Rattus tunneyi: Endangerment of a native pest	NA	Wildlife Research	Sites are not in the bioclimatic region
WOS_3617	WOS	10.1111/j.1442-9993.1997.tb00641.x	1997	Braithwaite, R. W.; Muller, W. J.	Rainfall, groundwater and refuges: Predicting extinctions of Australian tropical mammal species	NA	Australian Journal of Ecology	Sites are not in the bioclimatic region
WOS_3631	WOS	10.1016/j.biocon.2014.10.008	2014	Brand, Adrianne B.; Wiewel, Amber N. M.; Grant, Evan H. Campbell	Potential reduction in terrestrial salamander ranges associated with Marcellus shale development	NA	Biological Conservation	The study type is inappropriate (no data, simulation, recommendation)
WOS_3638	WOS	10.1676/10-061.1	2011	Brand, L. Arriana; Noon, Barry R.	SEASONAL FECUNDITY AND SOURCE-SINK STATUS OF SHRUB-NESTING BIRDS IN A SOUTHWESTERN RIPARIAN CORRIDOR	NA	Wilson Journal of Ornithology	Sites are not in the bioclimatic region
WOS_3639	WOS	10.1002/eco.143	2011	Brand, L. Arriana; Stromberg, Juliet C.; Goodrich, David C.; Dixon, Mark D.; Lansey, Kevin; Kang, Doosun; Brookshire, David S.; Cerasale, David J.	Projecting avian response to linked changes in groundwater and riparian floodplain vegetation along a dryland river: a scenario analysis	NA	Ecohydrology	Sites are not in the bioclimatic region
WOS_3640	WOS	10.2193/2008-217	2010	Brand, L. Arriana; Stromberg, Juliet C.; Noon, Barry R.	Avian Density and Nest Survival on the San Pedro River: Importance of Vegetation Type and Hydrologic Regime	NA	Journal of Wildlife Management	Sites are not in the bioclimatic region
WOS_3641	WOS	10.1525/cond.2008.8421	2008	Brand, L. Arriana; White, Gary C.; Noon, Barry R.	Factors influencing species richness and community composition of breeding birds in a desert riparian corridor	NA	Condor	Sites are not in the bioclimatic region
ZR_11109	ZR	NA	2006	Brandt, Thomas	First breeding of ospreys (Pandion haliaetus) at the Steinhuder Meer, lower Saxonoy [Saxony], and observations of reactions due to human disturbances.	NA	NA	Pdf cannot be obtained
WOS_3658	WOS	10.1656/058.009.0412	2010	Brannon, M. Patrick; Burt, Melissa A.; Bost, David M.; Caswell, Marguerite C.	Discarded Bottles as a Source of Shrew Species Distributional Data along an Elevational Gradient in the Southern Appalachians	NA	Southeastern Naturalist	The comparator is inappropriate
ZR_1082	ZR	10.2307/1521578	1990	Bratton, S. P.	Boat disturbance of Ciconiiformes in Georgia estuaries.	NA	NA	The document meets exclusion criteria for waterways
ZR_1087	ZR	NA	1999	Braun, Monika; Haussler, Ursel	Records of Pipistrellus pygmaeus (Leach, 1825), sibling species of the common pipistrelle in Nordbaden (Baden-Wurttemberg, SW-Germany).	NA	NA	Language is not English or French
ZR_1092	ZR	NA	2007	Brauze, Tomasz	Numbers and habitat preferences of the barred warbler Sylvia nisoria on the floodplain terrace of the lower Vistula River.	NA	NA	Pdf cannot be obtained
WOS_3691	WOS	10.1111/j.1469-7998.2011.00837.x	2011	Brearley, G.; McAlpine, C.; Bell, S.; Bradley, A.	Squirrel glider home ranges near urban edges in eastern Australia	NA	Journal of Zoology	The document meets previous screening exclusion criteria (Outcome)
WOS_3698	WOS	10.1002/rra.696	2003	Breck, S. W.; Wilson, K. R.; Andersen, D. C.	Beaver herbivory and its effect on cottonwood trees: Influence of flooding along matched regulated and unregulated rivers	NA	River Research and Applications	Sites are not in the bioclimatic region
WOS_3699	WOS	NA	2003	Breck, S. W.; Wilson, K. R.; Andersen, D. C.	Beaver herbivory of willow under two flow regimes: A comparative study on the green and Yampa Rivers	NA	Western North American Naturalist	Sites are not in the bioclimatic region
ZR_1099	ZR	NA	2012	Breck, Stewart W.; Goldstein, Michael I.; Pyare, Sanjay	Site-occupancy monitoring of an ecosystem indicator: linking characteristics of riparian vegetation to beaver occurrence.	NA	NA	Sites are not in the bioclimatic region
WOS_3703	WOS	10.1894/MH-32.1	2009	Breeden, Jeff B.; Small, Michael F.; Baccus, John T.; Eitniear, Jack C.	VEGETATIVE COMPOSITION OF AREAS WITH AND WITHOUT BREEDING RED-BILLED PIGEONS (PATAGIOENAS FLAVIROSTRIS) IN TEXAS	NA	Southwestern Naturalist	Sites are not in the bioclimatic region
WOS_3711	WOS	10.3354/dao01960	2008	Brem, Forrest M. R.; Lips, Karen R.	Batrachochytrium dendrobatidis infection patterns among Panamanian amphibian species, habitats and elevations during epizootic and enzootic	NA	Diseases of Aquatic Organisms	Sites are not in the bioclimatic region
WOS_3740	WOS	10.1002/rra.2688	2014	Breton, V.; Forestier, O.; Guindon, O.; Evette, A.	ECOLOGICAL RESTORATION UNDER PRESSURE FROM INVASIVE ANIMAL SPECIES: USE	NA	River Research and Applications	The comparator is inappropriate
ACTU_WOS_F_2079	WOS	10.1111/jvs.12425	2016	Brice, MH; Pellerin, S; Poulin, M	Environmental filtering and spatial processes in urban riparian forests	NA	NA	Sites are not in the bioclimatic region
WOS_3771	WOS	10.1890/08-1821.1	2010	Bridgeland, William T.; Beier, Paul; Kolb, Thomas; Whitham, Thomas G.	A conditional trophic cascade: Birds benefit faster growing trees with strong links between predators and plants	NA	Ecology	Sites are not in the bioclimatic region
ACTU_WOS_T_11001	WOS	10.1093/jmammal/gyu005	2015	Bridges, AS; Sanchez, JN; Biteman, DS	Spatial ecology of invasive feral cats on San Clemente Island: implications for control and management	NA	NA	Results are in an unexploitable format
WOS_3782	WOS	10.1894/0038-4909(2004)049<0209:DOARSA>2.0.CO;2	2004	Briggler, J. T.; Johnson, J. E.; Rambo, D. D.	Demographics of a ringed salamander (Ambystoma annulatum) breeding migration	NA	Southwestern Naturalist	The document meets previous screening exclusion criteria (Outcome)
WOS_3787	WOS	NA	1996	Briggs, M. K.; Howe, J.; Harris, L.; Halvorson, W.	Using long-term monitoring to understand how adjacent land development affects natural areas: An example from Saguaro National Park, Arizona (USA)	NA	Natural Areas Journal	Pdf cannot be obtained
WOS_3824	WOS	10.1016/j.biocon.2003.10.012	2004	Brock, R. E.; Kelt, D. A.	Influence of roads on the endangered Stephens' kangaroo rat (Dipodomys stephensi): are dirt and gravel roads different?	NA	Biological Conservation	The document meets previous screening exclusion criteria (Exposure)
ZR_11162	ZR	NA	1993	Brockelman, Warren Y.; Srikosamatara, Sompoad; Round, Philip D.; Poonswad, Pilai	Seasonal and habitat distribution of birds in the Central Plain: a survey at Salaya, Nakhon Pathom, Thailand.	NA	NA	Sites are not in the bioclimatic region
WOS_3830	WOS	10.1642/0004-8038(2007)124[1213:SWFETE]2.0.CO;2	2007	Brodhead, Katherine M.; Stoleson, Scott H.; Finch, Deborah M.	Southwestern willow flycatchers (Empidonax traillii extimus) in a grazed landscape: Factors influencing brood parasitism	NA	Auk	Sites are not in the bioclimatic region
WOS_3831	WOS	10.1111/cobi.12337	2015	Brodie, Jedediah F.; Giordano, Anthony J.; Dickson, Brett G.; Hebblewhite, Mark; Bernard, Henry; Mohd-Azlan, Jayasilan; Anderson, Jesse; Ambu, Laurentius	Evaluating multispecies landscape connectivity in a threatened tropical mammal community	NA	Conservation Biology	Sites are not in the bioclimatic region
ZR_11172	ZR	NA	1995	Brooker, M. G.; Smith, G. T.; Leone, J.; Ingram, J. A.	A biological survey of Garden Island, Western Australia: 2. Terrestrial mammals.	NA	NA	Pdf cannot be obtained
ZR_11174	ZR	NA	2013	Brooks, Matthew L.; Ostoja, Steven M.; Chambers, Jeanne C.	Invasive Species in Southern Nevada.	NA	NA	Sites are not in the bioclimatic region
WOS_3851	WOS	10.1007/BF02472004	1995	BROOKS, ML	BENEFITS OF PROTECTIVE FENCING TO PLANT AND RODENT COMMUNITIES OF THE WESTERN MOJAVE DESERT, CALIFORNIA	NA	Environmental Management	Sites are not in the bioclimatic region
WOS_3855	WOS	10.1093/forestry/cps031	2012	Brooks, Robert T.; Nislow, Keith H.; Lowe, Winsor H.; Wilson, Matthew K.; King, David I.	Forest succession and terrestrial-aquatic biodiversity in small forested watersheds: a review of principles, relationships and implications for management	NA	Forestry	The document is a review
WOS_3863	WOS	NA	1999	Brouse, P.	Twenty year change in the raptor community in northern Utah during the nonbreeding season	NA	Journal of Raptor Research	Sites are not in the bioclimatic region
WOS_3880	WOS	NA	1992	BROWN, BT	NESTING CHRONOLOGY, DENSITY AND HABITAT USE OF BLACK-CHINNED HUMMINGBIRDS ALONG THE COLORADO RIVER, ARIZONA	NA	Journal of Field Ornithology	Sites are not in the bioclimatic region
ZR_11183	ZR	NA	1989	Brown, C. J.; Lawson, J. L.	Birds and electricity transmission lines in South West Africa/Namibia.	NA	NA	Sites are not in the bioclimatic region
WOS_3888	WOS	10.1371/journal.pone.0040505	2012	Brown, Casey L.; Hardy, Amanda R.; Barber, Jesse R.; Fristrup, Kurt M.; Crooks, Kevin R.; Angeloni, Lisa M.	The Effect of Human Activities and Their Associated Noise on Ungulate Behavior	NA	Plos One	Sites are not in the bioclimatic region
WOS_3904	WOS	10.1016/j.biocon.2006.05.020	2006	Brown, Gregory P.; Phillips, Benjamin L.; Webb, Jonathan K.; Shine, Richard	Toad on the road: Use of roads as dispersal corridors by cane toads (Bufo marinus) at an invasion front in tropical Australia	NA	Biological Conservation	Sites are not in the bioclimatic region
ACTU_ZR_T_798	ZR	NA	2016	Brown, Gregory P.; Shine, Richard	Frogs in the spotlight: a 16-year survey of native frogs and invasive toads on a floodplain in tropical Australia.	NA	NA	Sites are not in the bioclimatic region
ACTU_WOS_F_2334	WOS	NA	2016	Brozdnyakov, VV	Interactions between the Eurasian beaver and riparian woody vegetation along the Pechora-Volga meridian	NA	NA	Sites are not in the bioclimatic region
ZR_11204	ZR	NA	2013	Bruekers, Jaco	Observations on the Troodos Lizard (Phoenicolacerta troodica) in North Cyprus.	NA	NA	Language is not English or French
WOS_3968	WOS	10.1890/1051-0761(2006)016[1539:TVIWTP]2.0.CO;2	2006	Bruggeman, Jason E.; Garrott, Robert A.; Bjornlie, Daniel D.; White, P. J.; Watson, Fred G. R.; Borkowski, John	Temporal variability in winter travel patterns of Yellowstone bison: The effects of road grooming	NA	Ecological Applications	Sites are not in the bioclimatic region
WOS_3969	WOS	10.1890/06-0196.1	2007	Bruggeman, Jason E.; Garrott, Robert A.; White, P. J.; Watson, Fred G. R.; Wallen, Rick	Covariates affecting spatial variability in bison travel behavior in Yellowstone National Park	NA	Ecological Applications	Sites are not in the bioclimatic region
WOS_3981	WOS	10.1007/s10661-009-1216-y	2010	Brumbaugh, William G.; Mora, Miguel A.; May, Thomas W.; Phalen, David N.	Metal exposure and effects in voles and small birds near a mining haul road in Cape Krusenstern National Monument, Alaska	NA	Environmental Monitoring and Assessment	Sites are not in the bioclimatic region
WOS_3983	WOS	NA	2007	Brumfield, Robb T.; Oswaldo, Maillard Z.	Birds of the central rio paracti valley, a humid montane forest in departamento Cochabamba, Bolivia	NA	Ornitologia Neotropical	Sites are not in the bioclimatic region
ZR_1208	ZR	NA	2012	Brummelhaus, Jaqueline; Bohn, Marcia Sueli; Petry, Maria Virginia	Bird community structure in riparian environments in Cai River, Rio Grande do Sul, Brazil.	NA	NA	The document meets exclusion criteria for waterways
ZR_1209	ZR	NA	2012	Brummelhaus, Jaqueline; Weber, Jessica; Petry, Maria Virginia	The influence of riparian forest fragmentation on birds in the River Hydrographic Basin, Rio Grande do Sul State.	NA	NA	Language is not English or French
WOS_3992	WOS	10.1002/aqc.544	2002	Brunke, M.	Floodplains of a regulated southern alpine river (Brenno, Switzerland): ecological assessment and conservation options	NA	Aquatic Conservation-Marine and Freshwater Ecosystems	Sites are not in the bioclimatic region
ZR_1214	ZR	NA	2012	Brunken, Heiko; Castro, Jesus Fernandez; Hein, Matthias; Verwold, Angela; Winkler, Martin	First records of round goby Neogobius melanostomus (Pallas, 1814) in the river Weser.	NA	NA	The document meets previous screening exclusion criteria (Population)
ACTU_WOS_T_810	WOS	10.1111/mec.14470	2018	Brunker, K; Lemey, P; Marston, DA; Fooks, AR; Lugelo, A; Ngeleja, C; Hampson, K; Biek, R	Landscape attributes governing local transmission of an endemic zoonosis: Rabies virus in domestic dogs	NA	NA	Sites are not in the bioclimatic region
WOS_4011	WOS	10.1894/MH-24.1	2009	Brush, Timothy	RANGE EXPANSIONS AND NEW BREEDING RECORDS OF BIRDS IN TAMAULIPAS, MEXICO	NA	Southwestern Naturalist	The document meets previous screening exclusion criteria (Exposure)
WOS_4020	WOS	10.1046/j.1365-2664.2002.00765.x	2002	Bryce, J.; Johnson, P. J.; Macdonald, D. W.	Can niche use in red and grey squirrels offer clues for their apparent coexistence?	NA	Journal of Applied Ecology	The document meets previous screening exclusion criteria (Exposure)
WOS_4027	WOS	10.1007/s00267-005-0152-z	2006	Bryce, Sandra A.	Development of a bird integrity index: Measuring avian response to disturbance in the Blue Mountains of Oregon, USA	NA	Environmental Management	The document meets exclusion criteria for waterways
WOS_4039	WOS	10.2193/0022-541X(2004)068[0383:RAUBAA]2.0.CO;2	2004	Bub, B. R.; Flaspohler, D. J.; Huckins, C. J. F.	Riparian and upland breeding-bird assemblages along headwater streams in Michigan's Upper Peninsula	NA	Journal of Wildlife Management	Sites are not in the bioclimatic region
WOS_4042	WOS	10.1894/PS-25.1	2010	Bucci, Melanie; Petryszyn, Yar; Krausman, Paul R.	OCCURRENCE AND ACTIVITY OF BATS AT THREE NATIONAL MONUMENTS IN CENTRAL ARIZONA	NA	Southwestern Naturalist	The document meets exclusion criteria for waterways
ZR_1244	ZR	NA	2007	Buckley, D. J.; Rogan, E.; Butler, F. T.	The habitat preferences of vespertilionid bats in a lowland mixed use landscape.	NA	NA	The comparator is inappropriate
WOS_4070	WOS	10.1016/j.mambio.2012.06.007	2013	Buckley, Daniel J.; Lundy, Mathieu G.; Boston, Emma S. M.; Scott, David D.; Gager, Yann; Proedohl, Paulo; Marnell, Ferdia; Montgomery, W. Ian; Teeling, Emma C.	The spatial ecology of the whiskered bat (Myotis mystacinus) at the western extreme of its range provides evidence of regional adaptation	NA	Mammalian Biology	The document meets previous screening exclusion criteria (Exposure)
WOS_4077	WOS	NA	1998	Buckton, S. T.; Brewin, P. A.; Lewis, A.; Stevens, P.; Ormerod, S. J.	The distribution of dippers, Cinclus cinclus (L.), in the acid-sensitive region of Wales, 1984-95	NA	Freshwater Biology	The document meets exclusion criteria for waterways
WOS_4078	WOS	NA	1997	Buckton, S. T.; Ormerod, S. J.	Use of a new standardized habitat survey for assessing the habitat preferences and distribution of upland river birds	NA	Bird Study	The document meets exclusion criteria for waterways
ZR_1248	ZR	10.1046/j.1365-2427.2002.00891.x	2002	Buckton, S. T.; Ormerod, S. J.	Global patterns of diversity among the specialist birds of riverine landscapes.	NA	NA	The study type is inappropriate (no data, simulation, recommendation)
WOS_4091	WOS	NA	2014	Budzik, Karolina A.; Budzik, Krystian M.	A preliminary report of amphibian mortality patterns on railways	NA	Acta Herpetologica	The comparator is inappropriate
WOS_4094	WOS	NA	2012	Bueno, Anderson Saldanha; Bruno, Renato Saragoca; Pimentel, Tania Pena; Sanaiotti, Tania Margarete; Magnusson, William Ernest	The width of riparian habitats for understory birds in an Amazonian forest	NA	Ecological Applications	Sites are not in the bioclimatic region
WOS_4106	WOS	10.2307/1564554	1995	BUHLMANN, KA	HABITAT USE, TERRESTRIAL MOVEMENTS, AND CONSERVATION OF THE TURTLE, DEIROCHELYS RETICULARIA IN VIRGINIA	NA	Journal of Herpetology	The document meets previous screening exclusion criteria (Exposure)
WOS_4112	WOS	NA	2008	Buitron-Jurado, Galo	Foraging behavior of two species,of manakins (pipridae) in mixed-species flocks in Yasuni, Ecuador	NA	Ornitologia Neotropical	Sites are not in the bioclimatic region
WOS_4115	WOS	NA	2012	Buk, Kenneth G.; Knight, Michael H.	Habitat suitability model for black rhinoceros in Augrabies Falls National Park, South Africa	NA	South African Journal of Wildlife Research	Sites are not in the bioclimatic region
WOS_4126	WOS	10.1016/S0006-3207(02)00179-9	2003	Bulger, J. B.; Scott, N. J.; Seymour, R. B.	Terrestrial activity and conservation of adult California red-legged frogs Rana aurora draytonii in coastal forests and grasslands	NA	Biological Conservation	The document meets exclusion criteria for waterways
WOS_4140	WOS	10.1111/j.1365-2656.2008.01498.x	2009	Bump, Joseph K.; Tischler, Keren B.; Schrank, Amy J.; Peterson, Rolf O.; Vucetich, John A.	Large herbivores and aquatic-terrestrial links in southern boreal forests	NA	Journal of Animal Ecology	Sites are not in the bioclimatic region
ACTU_WOS_T_9560	WOS	10.1111/eth.12428	2015	Bunkley, JP; Barber, JR	Noise Reduces Foraging Efficiency in Pallid Bats (Antrozous pallidus)	NA	NA	Sites are not in the bioclimatic region
WOS_4175	WOS	10.1016/S0006-3207(98)00054-8	1998	Burbrink, F. T.; Phillips, C. A.; Heske, E. J.	A riparian zone in southern Illinois as a potential dispersal corridor for reptiles and amphibians	NA	Biological Conservation	The comparator is inappropriate
WOS_4185	WOS	10.2307/3677048	1995	Bures, S.	Responses of Grey Wagtail Motacilla cinerea to changing prey availability during the nesting period	NA	Journal of Avian Biology	The comparator is inappropriate
WOS_4202	WOS	NA	2011	Burgmeier, Nicholas G.; Sutton, Trent M.; Williams, Rod N.	SPATIAL ECOLOGY OF THE EASTERN HELLBENDER (CRYPTOBRANCHUS ALLEGANIENSIS ALLEGANIENSIS) IN INDIANA	NA	Herpetologica	The comparator is inappropriate
WOS_4213	WOS	10.1670/0022-1511(2007)41[251:LHOPCT]2.0.CO;2	2007	Burkholder, Laura L.; Diller, Lowell V.	Life history of postmetamorphic coastal tailed frogs (Ascaphus truei) in northwestern California	NA	Journal of Herpetology	The document meets exclusion criteria for waterways
WOS_4229	WOS	10.1656/045.022.0109	2015	Burns, Lynne E.; Segers, Jordi L.; Broders, Hugh G.	Bat Activity and Community Composition in the Northern Boreal Forest of South-central Labrador, Canada	NA	Northeastern Naturalist	Sites are not in the bioclimatic region
WOS_4250	WOS	NA	2000	Burson, S. L.; Belant, J. L.; Fortier, K. A.; Tomkiewicz, W. C.	The effect of vehicle traffic on wildlife in Denali National Park	NA	Arctic	Sites are not in the bioclimatic region
WOS_4260	WOS	10.1007/s00267-002-2732-5	2002	Burton, N. H. K.; Armitage, M. J. S.; Musgrove, A. J.; Rehfisch, M. M.	Impacts of man-made landscape features on numbers of estuarine waterbirds at low tide	NA	Environmental Management	There is no comparator
WOS_4265	WOS	10.1163/157075408783489211	2008	Bury, R. Bruce	Low thermal tolerances of stream amphibians in the Pacific Northwest: Implications for riparian and forest management	NA	Applied Herpetology	The study type is inappropriate (no data, simulation, recommendation)
WOS_4273	WOS	10.2307/2937064	1995	BUSCH, DE; SMITH, SD	MECHANISMS ASSOCIATED WITH DECLINE OF WOODY SPECIES IN RIPARIAN ECOSYSTEMS OF THE SOUTHWESTERN US	NA	Ecological Monographs	Sites are not in the bioclimatic region
ACTU_WOS_T_249	WOS	10.1016/j.envpol.2018.01.060	2018	Buss, N; Hua, J	Parasite susceptibility in an amphibian host is modified by salinization and predators	NA	NA	The study type is inappropriate (no data, simulation, recommendation)
WOS_4310	WOS	10.1111/j.1365-2745.2007.01318.x	2008	Butler, Lem G.; Kielland, Knut	Acceleration of vegetation turnover and element cycling by mammalian herbivory in riparian ecosystems	NA	Journal of Ecology	Sites are not in the bioclimatic region
WOS_4312	WOS	10.2193/2006-270	2007	Butler, Matthew J.; Ballard, Warren B.; Wallace, Mark C.; Demaso, Stephen J.	Road-based surveys for estimating wild turkey density in the Texas Rolling Plains	NA	Journal of Wildlife Management	Sites are not in the bioclimatic region
ACTU_ZR_F_366	ZR	NA	2017	Bykova, E.A.; Gashev, S.N.	FAUNA OF MAMMALS OF TUGAI FOREST IN THE LEFT BANK OF SYRDARYA RIVER (UZBEKISTAN).	NA	NA	Pdf cannot be obtained
ZR_1325	ZR	NA	2003	Cabela, Antonia; Teufl, Hans	The effects of the reconstruction of the Danube's bank on the expansion of the indigenous reptile populations on the Danube Island in Vienna.	NA	NA	Language is not English or French
ZR_1328	ZR	NA	2011	Caccamo, Chiara; Pollonara, Enrica; Baldaccini, Natale Emilio; Giunchi, Dimitri	Diurnal and nocturnal ranging behaviour of Stone-curlews Burhinus oedicnemus nesting in river habitat.	NA	NA	The comparator is inappropriate
ZR_1330	ZR	NA	2004	Caffi, Mario	Breeding biology of nightingale, Luscinia megarhynchos, nesting in a river bank wood in the Po Plane in Lombardy (Italy).	NA	NA	Pdf cannot be obtained
WOS_4392	WOS	NA	1996	Cagnin, M.; Aloise, G.; Garofalo, G.; Milazzo, C.; Cristaldi, M.	Small terrestrial mammal communities of three Calabrian "fiumara" (Southern Italy)	NA	Vie Et Milieu-Life and Environment	Pdf cannot be obtained
ZR_11327	ZR	NA	2004	Cahoe, Regina D.; Troelstrup, Nels H.	Habitat use and population biology of the northern redbelly snake at Oaklake Field Station, SD.	NA	NA	Sites are not in the bioclimatic region
WOS_4410	WOS	NA	2003	Cain, J. W.; Morrison, M. L.	Reproductive ecology of Dusky Flycatchers in montane meadows of the central Sierra Nevada	NA	Western North American Naturalist	The document meets previous screening exclusion criteria (Exposure)
WOS_4411	WOS	NA	2003	Cain, J. W.; Morrison, M. L.; Bombay, H. L.	Predator activity and nest success of willow flycatchers and yellow warblers	NA	Journal of Wildlife Management	The document meets exclusion criteria for waterways
ACTU_WOS_F_828	WOS	10.1002/rra.3160	2017	Calderon, MR; Moglia, MM; Nievas, RP; Colombetti, PL; Gonzalez, SP; Jofre, MB	Assessment of the environmental quality of two urbanized lotic systems using multiple indicators	NA	NA	Sites are not in the bioclimatic region
WOS_4430	WOS	10.1080/02755947.2013.824934	2013	Caldwell, Colleen A.; Jacobi, Gerald Z.; Anderson, Michael C.; Parmenter, Robert R.; McGann, Jeanine; Gould, William R.; DuBey, Robert; Jacobi, M. Donna	Prescribed-Fire Effects on an Aquatic Community of a Southwest Montane Grassland System	NA	North American Journal of Fisheries Management	The document meets exclusion criteria for waterways
WOS_4436	WOS	10.1071/WR94075	1997	Caley, P.	Movements, activity patterns and habitat use of feral pigs (Sus scrofa) in a tropical habitat	NA	Wildlife Research	Sites are not in the bioclimatic region
ACTU_WOS_T_5140	WOS	10.1002/ecs2.1611	2017	Camacho, C; Saez-Gomez, P; Potti, J; Fedriani, JM	Nightjars, rabbits, and foxes interact on unpaved roads: spatial use of a secondary prey in a shared-predator system	NA	NA	The document meets previous screening exclusion criteria (Exposure)
WOS_4468	WOS	10.1016/j.beproc.2013.11.007	2014	Camacho, Carlos	'Bodyguard' plants: Predator-escape performance influences microhabitat choice by nightjars	NA	Behavioural Processes	The comparator is inappropriate
ACTU_WOS_T_7112	WOS	10.1088/1748-9326/11/4/045006	2016	Cameron, EA; Lantz, TC	Drivers of tall shrub proliferation adjacent to the Dempster Highway, Northwest Territories, Canada	NA	NA	Sites are not in the bioclimatic region
WOS_4480	WOS	10.1111/j.1472-4642.2012.00912.x	2012	Cameron, Erin K.; Bayne, Erin M.	Invasion by a non-native ecosystem engineer alters distribution of a native predator	NA	Diversity and Distributions	Sites are not in the bioclimatic region
GS_81	GREY_LITT_GoogleScholar	NA	1980	Cameron, R. D., & Whitten, K. R.	Influence of the Trans-Alaska Pipeline corridor on the local distribution of caribou	NA	NA	Sites are not in the bioclimatic region
WOS_4484	WOS	NA	2005	Cameron, R. D.; Smith, W. T.; White, R. G.; Griffith, B.	Central Arctic Caribou and petroleum development: Distributional, nutritional, and reproductive implications	NA	Arctic	Sites are not in the bioclimatic region
WOS_4486	WOS	NA	1979	CAMERON, RD; WHITTEN, KR; SMITH, WT; ROBY, DD	CARIBOU DISTRIBUTION AND GROUP COMPOSITION ASSOCIATED WITH CONSTRUCTION	NA	Canadian Field-Naturalist	Sites are not in the bioclimatic region
WOS_4490	WOS	10.2307/2426260	1994	CAMP, M.; BEST, LB	NEST DENSITY AND NESTING SUCCESS OF BIRDS IN ROADSIDES ADJACENT TO ROWCROP FIELDS	NA	American Midland Naturalist	The document meets previous screening exclusion criteria (Exposure)
ZR_11366	ZR	10.1139/z79-258	1979	Campbell, A.; MacKay, P. R.	Distribution of the American dog tick, Dermacentor variabilis (Say), and its small mammal hosts in relation to vegetation types in a study area in Nova Scotia.	NA	NA	Sites are not in the bioclimatic region
WOS_4505	WOS	10.1111/gcb.12114	2013	Campbell, Ruairidh D.; Newman, Chris; Macdonald, David W.; Rosell, Frank	Proximate weather patterns and spring green-up phenology effect Eurasian beaver (Castor fiber) body mass and reproductive success: the implications of climate change and topography	NA	Global Change Biology	Sites are not in the bioclimatic region
WOS_4507	WOS	10.1071/ZO09006	2009	Campbell, Susan	So long as it's near water: variable roosting behaviour of the large-footed myotis (Myotis macropus)	NA	Australian Journal of Zoology	The document meets exclusion criteria for waterways
ZR_1365	ZR	NA	1988	Camper, J. D.	The status of three uncommon salamanders (Amphibia: Caudata) in Iowa.	NA	NA	Sites are not in the bioclimatic region
WOS_4546	WOS	10.1371/journal.pone.0070262	2013	Canessa, Stefano; Parris, Kirsten M.	Multi-Scale, Direct and Indirect Effects of the Urban Stream Syndrome on Amphibian Communities in Streams	NA	Plos One	The document meets exclusion criteria for waterways
ZR_1373	ZR	NA	2010	Cao, Ming; Zhou, Wei; Bai, Bing; Zhang, Qin; Wang, Bin; Chen, Min-Yong	Habitat Use of Williamson's Mouse-deer (Tragulus williamsoni) in Mengla Area, Southern Yunnan.	NA	NA	Language is not English or French
ZR_1376	ZR	NA	2008	Capllonch, Patricia; Ortiz, Diego; Soria, Karina	Importance of Argentinean fluvial coast as a migratory corridor of birds.	NA	NA	Language is not English or French
ACTU_WOS_T_2257	WOS	10.1016/j.anbehav.2017.07.020	2017	Cappa, FM; Giannoni, SM; Borghi, CE	Effects of roads on the behaviour of the largest South American artiodactyl (Lama guanicoe) in an Argentine reserve	NA	NA	Sites are not in the bioclimatic region
ZR_1396	ZR	10.1650/7426	2004	Carlisle, Jay D.; Stock, Sarah L.; Kaltenecker, Gregory S.; Swanson, David L.	Habitat associations, relative abundance, and species richness of autumn landbird migrants in southwestern Idaho.	NA	NA	The document meets previous screening exclusion criteria (Exposure)
ZR_1397	ZR	NA	2006	Carlisle, Jay D.; Trost, Charles H.; Stock, Sarah L.; Kaltenecker, Gregory S.	Autumn landbird communities in the Boise Foothills and Owyhee Mountains of southwestern Idaho.	NA	NA	The document meets exclusion criteria for waterways
WOS_4669	WOS	10.1016/S0006-3207(97)00131-6	1998	Carmel, Y.; Safriel, U.	Habitat use by bats in a Mediterranean ecosystem in Israel - Conservation implications	NA	Biological Conservation	The document meets exclusion criteria for waterways
WOS_4678	WOS	NA	2001	Caro, T. M.; Brock, R.; Kelly, M.	Diversity of mammals in the Bladen Nature Reserve, Belize, and factors affecting their trapping success	NA	Mammalian Biology	Sites are not in the bioclimatic region
ZR_1404	ZR	NA	2013	Carolina Rosas-Espinoza, Veronica; Mauricio Rodriguez-Canseco, Jesus; Luisa Santiago-Perez, Ana; Ayon-Escobedo, Alberto; Dominguez-Laso, Matias	Distribution of some amphibians from central western Mexico: Jalisco.	NA	NA	Sites are not in the bioclimatic region
ZR_1410	ZR	10.1656/1528-7092-7.4.748	2008	Carr, John L.	Terrestrial foraging by two species of semiaquatic turtles (Testudines: Emydidae).	NA	NA	The comparator is inappropriate
WOS_4707	WOS	10.1007/s10980-011-9682-3	2012	Carranza, Maria Laura; D'Alessandro, Evelina; Saura, Santiago; Loy, Anna	Connectivity providers for semi-aquatic vertebrates: the case of the endangered otter in Italy	NA	Landscape Ecology	The study type is inappropriate (no data, simulation, recommendation)
ZR_1421	ZR	10.2307/3801627	1987	Carson, R. G.; Peek, J. M.	Mule deer habitat selection patterns in northcentral Washington.	NA	NA	Sites are not in the bioclimatic region
WOS_4744	WOS	10.1071/WR12169	2013	Carter, Andrew; Luck, Gary W.	Fox baiting in agricultural landscapes: preliminary findings on the importance of bait-site selection	NA	Wildlife Research	Results are in an unexploitable format
WOS_4745	WOS	10.1071/AM11038	2012	Carter, Andrew; Luck, Gary W.; Wilson, Ben P.	Ecology of the red fox (Vulpes vulpes) in an agricultural landscape. 1. Den-site selection	NA	Australian Mammalogy	Sites are not in the bioclimatic region
WOS_4754	WOS	10.2193/0022-541X(2006)70[1185:IBITMT]2.0.CO;2	2006	Carter, Timothy C.	Indiana bats in the Midwest: The importance of hydric habitats	NA	Journal of Wildlife Management	The document is a review
WOS_4755	WOS	10.1007/s10531-013-0445-0	2013	Carthew, Susan M.; Garrett, Liesl A.; Ruykys, Laura	Roadside vegetation can provide valuable habitat for small, terrestrial fauna in South Australia	NA	Biodiversity and Conservation	Sampling points are not on verges (exposure)
WOS_4756	WOS	10.1071/WR08090	2009	Carthew, Susan M.; Horner, Briony; Jones, Katherine M. W.	Do utility corridors affect movements of small terrestrial fauna?	NA	Wildlife Research	The document meets previous screening exclusion criteria (Exposure)
WOS_4761	WOS	NA	1999	Cartron, J. L. E.; Stoleson, S. H.; Johnson, R. R.	Riparian dependence, biogeographic status, and likelihood of endangerment in landbirds of the Southwest	NA	NA	The document is a review
ZR_1434	ZR	NA	2007	Cartron, Jean-Luc E.; Means, Michael D.; Hawksworth, David L.; Finch, Deborah M.	Colonization of the eastern bluebird along the Rio Grande in New Mexico.	NA	NA	Sites are not in the bioclimatic region
WOS_4769	WOS	10.1016/j.ecolmodel.2014.11.004	2015	Caruso, N.; Guerisoli, M.; Vidal, E. M. Luengos; Castillo, D.; Casanave, E. B.; Lucherini, M.	Modelling the ecological niche of an endangered population of Puma concolor: First application of the GNESFA method to an elusive carnivore	NA	Ecological Modelling	The document meets previous screening exclusion criteria (Exposure)
ACTU_WOS_F_762	WOS	10.15446/abc.v22n3.63561	2017	Casallas-Pabon, D; Calvo-Roa, N; Rojas-Robles, R	Seed Dispersal by Bats Over Successional Gradients in the Colombian Orinoquia (San Martin, Meta, Colombia)	NA	NA	Language is not English or French
ZR_1457	ZR	NA	2011	Casillas, Juan Loera; Rost, Josep; Contreras Martinez, Sarahy; Gomez Llamas, Jose Cruz	Seasonal abundance of the Orange-breasted Bunting (Passerina leclancherii) in the riparian forest of western Mexico.	NA	NA	Language is not English or French
WOS_4817	WOS	10.1007/s00114-009-0512-2	2009	Cassini, Marcelo H.; Fasola, Laura; Chehebar, Claudio; Macdonald, David W.	Scale-dependent analysis of an otter-crustacean system in Argentinean Patagonia	NA	Naturwissenschaften	Results are in an unexploitable format
WOS_4816	WOS	10.1007/s10750-010-0332-6	2010	Cassini, Marcelo H.; Fasola, Laura; Chehebar, Claudio; Macdonald, David W.	Defining conservation status using limited information: the case of Patagonian otters Lontra provocax in Argentina	NA	Hydrobiologia	The comparator is inappropriate
ZR_11443	ZR	NA	2009	Castaldi, Amalia; Guerrieri, Gaspare	Feeding habits and habitat selection of the black kite Milvus migrans in the Roman hinterland (Latium, central Italy).	NA	NA	Pdf cannot be obtained
ZR_11446	ZR	NA	2012	Castelijns, Henk	Behaviour of a wintering gyrfalcon Falco rusticolus in Zeeuws-Vlaanderen and northern Flanders in 2011/12.	NA	NA	Language is not English or French
ACTU_WOS_F_3774	WOS	10.1007/s00267-015-0463-7	2015	Castilho, CS; Hackbart, VCS; Pivello, VR; dos Santos, RF	Evaluating Landscape Connectivity for Puma concolor and Panthera onca Among Atlantic Forest Protected Areas	NA	NA	The study type is inappropriate (no data, simulation, recommendation)
WOS_4857	WOS	10.1656/058.010.0310	2011	Catall, Lara L.; Odom, Darcie L.; Bangma, Jacqueline T.; Barrett, Terry L.; Barrett, Gary W.	Artificial Nest Cavities Designed for Use by Small Mammals	NA	Southeastern Naturalist	The document meets previous screening exclusion criteria (Exposure)
WOS_4878	WOS	10.1111/j.1474-919X.2011.01176.x	2012	Catry, Ines; Franco, Aldina M. A.; Sutherland, William J.	Landscape and weather determinants of prey availability: implications for the Lesser Kestrel Falco naumanni	NA	Ibis	The document meets exclusion criteria for waterways
WOS_4881	WOS	10.1111/eff.12106	2014	Cattaneo, Franck; Grimardias, David; Carayon, Marie; Persat, Henri; Bardonnet, Agnes	A multidimensional typology of riverbank habitats explains the distribution of European grayling (Thymallus thymallus L.) fry in a temperate river	NA	Ecology of Freshwater Fish	The document meets previous screening exclusion criteria (Population)
ACTU_ZR_F_977	ZR	NA	2016	Causaren, Rubie M.; Diesmos, Arvin C.; Mallari, Neil Aldrin D.	Anuran Diversity and Ecology from Forest Fragments in Cavite Province, Luzon Island, Philippines.	NA	NA	Sites are not in the bioclimatic region
WOS_4903	WOS	10.1163/156853811X614461	2011	Cayuela, Hugo; Cheylan, Marc; Joly, Pierre	The best of a harsh lot in a specialized species: breeding habitat use by the yellow-bellied toad (Bombina variegata) on rocky riverbanks	NA	Amphibia-Reptilia	The comparator is inappropriate
ZR_11463	ZR	NA	2015	Cayuela, Hugo; Lambrey, Julie; Vacher, Jean-Pierre; Miaud, Claude	Highlighting the effects of land-use change on a threatened amphibian in a human-dominated landscape.	NA	NA	The document meets previous screening exclusion criteria (Exposure)
ACTU_WOS_F_3070	WOS	10.1139/cjz-2015-0111	2016	Cecala, KK; Maerz, JC	Context-dependent responses to light contribute to responses by Black-bellied Salamanders (Desmognathus quadramaculatus) to landscape disturbances	NA	NA	The document meets previous screening exclusion criteria (Outcome)
ACTU_WOS_F_237	WOS	10.1002/ecs2.2150	2018	Cecala, KK; Maerz, JC; Halstead, BJ; Frisch, JR; Gragson, TL; Hepinstall-Cymerman, J; Leigh, DS; Jackson, CR; Peterson, JT; Pringle, CM	Multiple drivers, scales, and interactions influence southern Appalachian stream salamander occupancy	NA	NA	The comparator is inappropriate
WOS_4907	WOS	10.1111/fwb.12439	2014	Cecala, Kristen K.; Lowe, Winsor H.; Maerz, John C.	Riparian disturbance restricts in-stream movement of salamanders	NA	Freshwater Biology	The document meets exclusion criteria for waterways
WOS_4928	WOS	10.1111/j.1557-9263.2009.00206.x	2009	Celis-Murillo, Antonio; Deppe, Jill L.; Allen, Michael F.	Using soundscape recordings to estimate bird species abundance, richness, and composition	NA	Journal of Field Ornithology	The document meets previous screening exclusion criteria (Exposure)
EM_83	GREY_LITT_email_request	NA	2008	CEN Languedoc-Roussillon	La rehabilitation du site de compensation de l’ile des brotteaux. Synthese des amenagements et de la gestion du site (2002-2007)	NA	NA	The document does not dealt with our 6 specific questions
WOS_4939	WOS	10.1016/j.limno.2013.11.005	2014	Ceneviva-Bastos, Monica; Casatti, Lilian	Shading effects on community composition and food web structure of a deforested pasture stream: Evidences from a field experiment in Brazil	NA	Limnologica	Sites are not in the bioclimatic region
EM_84	GREY_LITT_email_request	NA	NA	CERA Environnement	Ecologie des bords d'autoroutes. Bilan de trente années d'aménagement et de gestion extensive	NA	NA	The study type is inappropriate (no data, simulation, recommendation)
ACTU_GREY_LITT_93	GREY_LITT_CEREMA/DTRF	NA	2016	Cerema	Étude de la mortalité de la petite faune dans les caniveaux d’assainissement en « U » le long des routes dans l’Est de la France	NA	NA	The document does not dealt with our 6 specific questions
WOS_4949	WOS	NA	2009	Cerezo, Alexis; Robbins, Chandler S.; Dowell, Barbara	Modified-habitat use by tropical forest-dependent birds in the Caribbean region of Guatemala	NA	Revista De Biologia Tropical	Language is not English or French
ACTU_WOS_T_10274	WOS	10.1007/s13364-015-0226-0	2015	Cervinka, J; Riegert, J; Grill, S; Salek, M	Large-scale evaluation of carnivore road mortality: the effect of landscape and local scale characteristics	NA	NA	The document meets previous screening exclusion criteria (Outcome)
ZR_1504	ZR	NA	2012	Cesar Arriaga-Flores, Julio; Castro-Arellano, Ivan; Moreno-Valdez, Arnulfo; Correa-Sandoval, Alfonso	TEMPORAL NICHE OVERLAP OF A RIPARIAN FOREST BAT ASSEMBLAGE IN SUBTROPICAL MEXICO.	NA	NA	Sites are not in the bioclimatic region
WOS_4981	WOS	10.1016/S0169-2046(02)00220-7	2003	Chace, J. F.; Walsh, J. J.; Cruz, A.; Prather, J. W.; Swanson, H. M.	Spatial and temporal activity patterns of the brood parasitic brown-headed cowbird at an urban/wildland interface	NA	Landscape and Urban Planning	Sites are not in the bioclimatic region
ZR_1518	ZR	NA	2004	Chamberlain, Michael J.; Constible, Juanita M.; Leopold, Bruce D.; Hodges, Kurt M.; Burton, Jason E. G.	Relationships between landscape characteristics and space use of raccoons in two managed pine forests.	NA	NA	The document meets exclusion criteria for waterways
WOS_5028	WOS	10.1656/1092-6194(2008)15[123:LREOBS]2.0.CO;2	2008	Chambers, David L.	Logging road effects on breeding-site selection in Notophthalmus viridescens (Red-spotted Newt) and three ambystomatid salamanders in south-central Pennsylvania	NA	Northeastern Naturalist	The document meets previous screening exclusion criteria (Exposure)
WOS_5032	WOS	NA	2011	Chambers, Mary; David, Gabriel; Ray, Courtenay; Leitner, Ben; Pyle, Peter	HABITATS AND CONSERVATION OF MOLT-MIGRANT BIRDS IN SOUTHEASTERN ARIZONA	NA	Southwestern Naturalist	Sites are not in the bioclimatic region
WOS_5039	WOS	10.1111/j.1744-7429.2008.00420.x	2008	Chan, Eric K. W.; Yu, Yat-Tung; Zhang, Yixin; Dudgeon, David	Distribution patterns of birds and insect prey in a tropical riparian forest	NA	Biotropica	Sites are not in the bioclimatic region
WOS_5042	WOS	10.1071/MF07191	2008	Chan, Eric K. W.; Zhang, Yixin; Dudgeon, David	Arthropod 'rain' into tropical streams: the importance of intact riparian forest and influences on fish diets	NA	Marine and Freshwater Research	Sites are not in the bioclimatic region
ACTU_WOS_F_1758	WOS	10.1016/j.landurbplan.2016.05.028	2017	Chang, CR; Chien, HF; Shiu, HJ; Ko, CJ; Lee, PF	Multiscale heterogeneity within and beyond Taipei city greenspaces and their relationship with avian biodiversity	NA	NA	The comparator is inappropriate
ZR_1532	ZR	NA	2011	Chang, Yuan-Hsiou; Wang, Hsiao-Wen; Hou, Wen-Shang	Effects of construction materials and design of lake and stream banks on climbing ability of frogs and salamanders.	NA	NA	The study type is inappropriate (no data, simulation, recommendation)
WOS_5115	WOS	10.1016/S0167-8809(01)00154-2	2002	Chapman, E. W.; Ribic, C. A.	The impact of buffer strips and stream-side grazing on small mammals in southwestern Wisconsin	NA	Agriculture Ecosystems & Environment	Sites are not in the bioclimatic region
WOS_5121	WOS	10.1002/aqc.3270020402	1992	CHARBONNEAU, R.; RESH, VH	STRAWBERRY CREEK ON THE UNIVERSITY-OF-CALIFORNIA, BERKELEY CAMPUS - A CASE-HISTORY OF URBAN STREAM RESTORATION	NA	Aquatic Conservation-Marine and Freshwater Ecosystems	The document meets exclusion criteria for waterways
ACTU_WOS_T_2618	WOS	10.3398/064.077.0211	2017	Charrel, GM; Paniagua, O; Osorio-Beristain, M	LIMITATIONS IN THE REPRODUCTIVE SUCCESS OF A BURROW-NESTING BIRD (MOMOTUS MEXICANUS) DURING A HUMID SEASON	NA	NA	Sites are not in the bioclimatic region
ACTU_ZR_F_183	ZR	NA	2017	Chartier, Alain	A Census of the Grey Wagtail, Common Kingfisher and Common Moorhen on the rivers in Normandy 2010-2011.	NA	NA	Pdf cannot be obtained
WOS_5163	WOS	NA	2010	Chaves, Oscar M.; Stoner, Kathryn E.	River crossings by Ateles geoffroyi and Alouatta pigra in southern Mexico: A preliminary report	NA	Revista Chilena De Historia Natural	Sites are not in the bioclimatic region
ACTU_WOS_T_9275	WOS	10.1016/j.biocon.2015.10.003	2015	Chen, HL; Koprowski, JL	Animal occurrence and space use change in the landscape of anthropogenic noise	NA	NA	Sites are not in the bioclimatic region
ACTU_WOS_T_6554	WOS	10.1016/j.biocon.2016.03.017	2016	Chen, HL; Koprowski, JL	Barrier effects of roads on an endangered forest obligate: influences of traffic, road edges, and gaps	NA	NA	Sites are not in the bioclimatic region
ACTU_WOS_T_7601	WOS	10.1371/journal.pone.0148121	2016	Chen, HL; Koprowski, JL	Differential Effects of Roads and Traffic on Space Use and Movements of Native Forest-Dependent and Introduced Edge-Tolerant Species	NA	NA	Sites are not in the bioclimatic region
ZR_11509	ZR	NA	2011	Chen, Jiu-Yi; Zhang, Li-Jia; Wang, An-Meng; Nasendelger; Bater; Yuan, Li; Bao, Wei-Dong	Population, distribution and food composition of wolves (Canis lupus) at Saihanwula Nature Reserve, Inner Mongolia.	NA	NA	Language is not English or French
WOS_5257	WOS	10.1134/S106741361203006X	2012	Chen, W.; Wu, Q. G.; Hu, J. C.; Lu, X.; You, Z. Q.	Seasonal habitat use of Chinese goral (Naemorhedus griseus) in a subtropical forest	NA	Russian Journal of Ecology	Sites are not in the bioclimatic region
ACTU_ZR_T_809	ZR	NA	2016	Chen, Xiao-min; Ma, Li-han; Wu, Tai-ping; Tian, Jun-hua; Xia, Jian-qiu; Liu, Qiang; Zhou, Liang-cai; Bao, Ji-yong	Investigation on correlation between rodent burrows on soil surface and underground wells in urban setting.	NA	NA	Pdf cannot be obtained
ZR_11514	ZR	NA	2011	Cheng, Chuang; Han, Lian-xiang	Nest-site Characteristics of Blue Tailed Bee-eaters of Nujiang Valley in Yunnan.	NA	NA	Language is not English or French
ACTU_WOS_F_1725	WOS	10.1016/j.biocon.2016.11.014	2017	Chestin, IE; Paltsyn, MY; Pereladova, OB; Legorova, LV; Gibbs, JP	Tiger re-establishment potential to former Caspian tiger (Panthera tigris virgata) range in Central Asia	NA	NA	The study type is inappropriate (no data, simulation, recommendation)
ACTU_ZR_F_915	ZR	NA	2016	Chevallier, Damien; Brossault, Paul; Gendre, Nicolas; Baillon, Francois; Duponnois, Robin; Chapalain, Frederic; Strenna, Luc; Yameogo, Dieudonne; Le Maho, Yvon	Threats on the wintering grounds of migratory species in West Africa.	NA	NA	Sites are not in the bioclimatic region
ACTU_WOS_T_7169	WOS	10.1093/jmammal/gyv186	2016	Chiappero, MB; Sommaro, LV; Priotto, JW; Wiernes, MP; Steinmann, AR; Gardenal, CN	Spatio-temporal genetic structure of the rodent Calomys venustus in linear, fragmented habitats	NA	NA	The comparator is inappropriate
WOS_5457	WOS	10.1111/ibi.12035	2013	Chiu, Ming-Chih; Kuo, Mei-Hwa; Hong, Shiao-Yu; Sun, Yuan-Hsun	Impact of extreme flooding on the annual survival of a riparian predator, the Brown Dipper Cinclus pallasii	NA	Ibis	The document meets exclusion criteria for waterways
WOS_5462	WOS	10.1016/j.foreco.2010.02.006	2010	Chizinski, Christopher J.; Vondracek, Bruce; Blinn, Charles R.; Newman, Raymond M.; Atuke, Dickson M.; Fredricks, Keith; Hemstad, Nathaniel A.; Merten, Eric; Schlesser, Nicholas	The influence of partial timber harvesting in riparian buffers on macroinvertebrate and fish communities in small streams in Minnesota, USA	NA	Forest Ecology and Management	Sites are not in the bioclimatic region
ZR_1597	ZR	NA	2007	Chmielewski, Slawomir; Tabor, Jacek; Iwanczuk, Cezary	Changes in the breeding avifauna of the river Pilica in 1974-2004.	NA	NA	Language is not English or French
WOS_5471	WOS	10.1007/s10201-009-0275-7	2009	Cho, Hee-Sun; Choi, Kwang-Hee; Lee, Sang-Don; Park, Young-Seuk	Characterizing habitat preference of Eurasian river otter (Lutra lutra) in streams using a self-organizing map	NA	Limnology	Sites are not in the bioclimatic region
ZR_1598	ZR	NA	1992	Choate, J. R.; Haner, T. W.	Probable distribution of the woodchuck in north central Kansas.	NA	NA	Pdf cannot be obtained
ZR_1599	ZR	NA	1991	Choate, J. R.; Moore, D. W.; Frey, J. K.	Dispersal of the meadow jumping mouse in northern Kansas.	NA	NA	Pdf cannot be obtained
WOS_5545	WOS	NA	2014	Chowdhury, Sayam U.; Foysal, Mohammad; Sharpe, John; Shahadat, Omar	A survey for Black-bellied Tern Sterna acuticauda and other riverine birds on the Jamuna and Padma rivers in Bangladesh	NA	Forktail	Sites are not in the bioclimatic region
ACTU_WOS_T_5229	WOS	10.1002/jwmg.21147	2017	Christie, KS; Jensen, WF; Boyce, MS	Pronghorn resource selection and habitat fragmentation in North Dakota	NA	NA	Sites are not in the bioclimatic region
WOS_5567	WOS	10.1644/05-MAMM-A-013R1.1	2006	Christopher, C. C.; Barrett, G. W.	Coexistence of white-footed mice (Peromyscus leucopus) and golden mice (Ochrotomys nuttalli) in a southeastern forest	NA	Journal of Mammalogy	The document meets previous screening exclusion criteria (Exposure)
WOS_5570	WOS	10.1139/Z03-123	2003	Chruszcz, B.; Clevenger, A. P.; Gunson, K. E.; Gibeau, M. L.	Relationships among grizzly bears, highways, and habitat in the Banff-Bow Valley, Alberta, Canada	NA	Canadian Journal of Zoology-Revue Canadienne De Zoologie	Sites are not in the bioclimatic region
WOS_5621	WOS	NA	1999	Chung-MacCoubrey, A.	Maternity roosts of bats at the Bosque del Apache National Wildlife Refuge: A preliminary report	NA	NA	Sites are not in the bioclimatic region
WOS_5622	WOS	10.3398/064.069.0217	2009	Chung-MacCoubrey, Alice; Bateman, Heather L.; Finch, Deborah M.	CAPTURES OF CRAWFORD'S GRAY SHREWS (NOTIOSOREX CRAWFORDI) ALONG THE RIO GRANDE IN CENTRAL NEW MEXICO	NA	Western North American Naturalist	Sites are not in the bioclimatic region
WOS_5631	WOS	NA	2014	Chutipong, Wanlop; Lynam, Antony J.; Steinmetz, Robert; Savini, Tommaso; Gale, George A.	Sampling mammalian carnivores in western Thailand: Issues of rarity and detectability	NA	Raffles Bulletin of Zoology	Sites are not in the bioclimatic region
ACTU_WOS_T_10487	WOS	10.1007/s10344-015-0911-y	2015	Ciechanowski, M	Habitat preferences of bats in anthropogenically altered, mosaic landscapes of northern Poland	NA	NA	Results are in an unexploitable format
WOS_5650	WOS	10.1007/s10344-010-0481-y	2011	Ciechanowski, Mateusz; Kubic, Weronika; Rynkiewicz, Aleksandra; Zwolicki, Adrian	Reintroduction of beavers Castor fiber may improve habitat quality for vespertilionid bats foraging in small river valleys	NA	European Journal of Wildlife Research	The document meets exclusion criteria for waterways
ZR_1637	ZR	NA	2007	Ciechanowski, Mateusz; Sachanowicz, Konrad; Kokurewicz, Tomasz	Rare or underestimated? The distribution and abundance of the pond bat (Myotis dasycneme) in Poland.	NA	NA	The document is a review
ACTU_WOS_F_3609	WOS	NA	2015	Cinquegranelli, A; Salvi, D; Vignoli, L	The amphibians of the Circeo National Park, central Italy: distribution and aquatic habitat use	NA	NA	The document meets exclusion criteria for waterways
ACTU_WOS_T_1834	WOS	10.1111/btp.12480	2017	Ciocheti, G; de Assis, JC; Ribeiro, JW; Ribeiro, MC	Highway widening and underpass effects on vertebrate road mortality	NA	NA	The document meets previous screening exclusion criteria (Outcome)
ZR_11576	ZR	NA	2011	Clancy, Greg P.; Ford, Hugh A.	Nest site selection and nesting behaviour of the Black-necked Stork Ephippiorhynchus asiaticus australis in northern New South Wales.	NA	NA	Sampling points are not on verges (exposure)
ZR_11578	ZR	NA	1998	Claridge, Andrew W.	Use of tracks and trails by introduced predators: an important consideration in the study of native ground-dwelling mammals.	NA	NA	The comparator is inappropriate
WOS_5711	WOS	NA	1996	Clark, B. K.; Clark, B. S.; Munsterman, W. E.; Homerding, T. R.	Differential use of roadside fencerows and contiguous pastures by small mammals in southeastern Oklahoma	NA	Southwestern Naturalist	Results are in an unexploitable format
WOS_5720	WOS	10.2192/1537-6176(2005)016[0234:ABBABY]2.0.CO;2	2005	Clark, J. D.; Dobey, S.; Masters, D. V.; Scheick, B. K.; Pelton, M. R.; Sunquist, M. E.	American black bears and bee yard depredation at Okefenokee Swamp, Georgia	NA	Ursus	The comparator is inappropriate
ACTU_WOS_T_9553	WOS	10.1002/jwmg.955	2015	Clark, JD; Laufenberg, JS; Davidson, M; Murrow, JL	Connectivity among subpopulations of louisiana black bears as estimated by a step selection function	NA	NA	Sampling points are not on verges (exposure)
WOS_5731	WOS	10.1111/j.1523-1739.2009.01439.x	2010	Clark, Rulon W.; Brown, William S.; Stechert, Randy; Zamudio, Kelly R.	Roads, Interrupted Dispersal, and Genetic Diversity in Timber Rattlesnakes	NA	Conservation Biology	Sites are not in the bioclimatic region
WOS_5750	WOS	10.2307/4003148	2000	Clary, W. P.; Leininger, W. C.	Stubble height as a tool for management of riparian areas	NA	Journal of Range Management	The document is a review
WOS_5752	WOS	NA	1996	Clary, W. P.; Shaw, N. L.; Dudley, J. G.; Saab, V. A.; Kinney, J. W.; Smithman, L. C.	Response of a depleted sagebrush steppe riparian system to grazing control and woody plantings	NA	Usda Forest Service Intermountain Research Station Research Paper	Sites are not in the bioclimatic region
WOS_5767	WOS	10.1071/WR13058	2013	Clemann, Nick; Scroggie, Michael P.; Smith, Michael J.; Peterson, Garry N. L.; Hunter, David	Characteristics of refugia used by the threatened Australian growling grass frog (Litoria raniformis) during a prolonged drought	NA	Wildlife Research	The comparator is inappropriate
WOS_5778	WOS	10.1002/jwmg.183	2011	Clements, Gregory M.; Hygnstrom, Scott E.; Gilsdorf, Jason M.; Baasch, David M.; Clements, Myndi J.; Vercauteren, Kurt C.	Movements of White-Tailed Deer in Riparian Habitat: Implications for Infectious Diseases	NA	Journal of Wildlife Management	Sites are not in the bioclimatic region
WOS_5782	WOS	10.1016/j.jag.2012.07.001	2013	Clerici, Nicola; Vogt, Peter	Ranking European regions as providers of structural riparian corridors for conservation and management purposes	NA	International Journal of Applied Earth Observation and Geoinformation	The study type is inappropriate (no data, simulation, recommendation)
WOS_5787	WOS	10.1046/j.0021-8901.2001.00678.x	2001	Clevenger, A. P.; Chruszcz, B.; Gunson, K.	Drainage culverts as habitat linkages and factors affecting passage by mammals	NA	Journal of Applied Ecology	Sites are not in the bioclimatic region
WOS_5788	WOS	NA	2001	Clevenger, A. P.; Chruszcz, B.; Gunson, K. E.	Highway mitigation fencing reduces wildlife-vehicle collisions	NA	Wildlife Society Bulletin	Sites are not in the bioclimatic region
WOS_5792	WOS	10.1046/j.1523-1739.2000.00099-085.x	2000	Clevenger, A. P.; Waltho, N.	Factors influencing the effectiveness of wildlife underpasses in Banff National Park, Alberta, Canada	NA	Conservation Biology	Sites are not in the bioclimatic region
WOS_5800	WOS	NA	1993	CLEVENGER, AP	SPRING AND SUMMER FOOD-HABITS AND HABITAT USE OF THE EUROPEAN PINE MARTEN (MARTES-MARTES) ON THE ISLAND OF MINORCA, SPAIN	NA	Journal of Zoology	The document meets previous screening exclusion criteria (Exposure)
WOS_5820	WOS	10.3390/f5112679	2014	Clipp, Hannah L.; Anderson, James T.	Environmental and Anthropogenic Factors Influencing Salamanders in Riparian Forests: A Review	NA	Forests	The document is a review
WOS_5843	WOS	10.1016/j.jaridenv.2014.08.004	2014	Coates, Peter S.; Howe, Kristy B.; Casazza, Michael L.; Delehanty, David J.	Common raven occurrence in relation to energy transmission line corridors transiting human-altered sagebrush steppe	NA	Journal of Arid Environments	Sites are not in the bioclimatic region
WOS_5856	WOS	10.1016/S0006-3207(02)00357-9	2003	Cockle, K. L.; Richardson, J. S.	Do riparian buffer strips mitigate the impacts of clearcutting on small mammals?	NA	Biological Conservation	The document meets exclusion criteria for waterways
WOS_5858	WOS	NA	2008	Codesido, Mariano; Gonzalez Fischer, Carlos; Bilenca, David	Land use patterns and bird assemblages in agroecosystems of the Pampean Region, Argentina	NA	Ornitologia Neotropical	Language is not English or French
WOS_5860	WOS	10.1071/MU13110	2015	Codesido, Mariano; Zufiaurre, Emmanuel; Bilenca, David	Relationship between pest birds and landscape elements in the Pampas of central Argentina	NA	Emu	The comparator is inappropriate
WOS_5869	WOS	10.1127/fal/2014/0589	2014	Coelho, Diana; Hughes, Samantha Jane; Varandas, Simone; Vitor Cortes, Rui Manuel	Conservation benefits of riparian buffers in urban areas: the case of the Rio Corgo (north Portugal)	NA	Fundamental and Applied Limnology	The document meets previous screening exclusion criteria (Exposure)
EM_112	GREY_LITT_email_request	NA	2012	Cofhuat	Préserver la biodiversité : un enjeu national, les actions d'opérateurs d'infrastructures	NA	NA	The document is a review
EM_115	GREY_LITT_email_request	NA	2012	Cofiroute	La restauration et la valorisation d’un site d’intérêt écologique : l’étang de Sologne	NA	NA	The study type is inappropriate (no data, simulation, recommendation)
WOS_5922	WOS	10.2307/3802173	1997	Cole, E. C.; McComb, W. C.; Newton, M.; Chambers, C. L.; Leeming, J. P.	Response of amphibians to clearcutting, burning, and glyphosate application in the Oregon coast range	NA	Journal of Wildlife Management	The document meets exclusion criteria for waterways
WOS_5923	WOS	10.2307/3801984	1998	Cole, E. C.; McComb, W. C.; Newton, M.; Leeming, J. P.; Chambers, C. L.	Response of small mammals to clearcutting, burning, and glyphosate application in the Oregon Coast Range	NA	Journal of Wildlife Management	The document meets exclusion criteria for waterways
WOS_5925	WOS	NA	2004	Cole, E. K.; Pope, M. D.; Anthony, R. G.	Influence of road management on diurnal habitat use of Roosevelt elk	NA	Northwest Science	Results are in an unexploitable format
ZR_11642	ZR	10.2307/3802109	1997	Cole, Eric K.; Pope, Michael D.; Anthony, Robert G.	Effects of road management on movement and survival of Roosevelt elk.	NA	NA	The document meets previous screening exclusion criteria (Exposure)
ZR_11647	ZR	10.2307/3809213	1989	Coleman, J. S.; Fraser, J. D.	Habitat use and home ranges of black and turkey vultures.	NA	NA	The document meets previous screening exclusion criteria (Exposure)
WOS_5942	WOS	10.1371/journal.pone.0020483	2011	Coleman, Joanna L.; Barclay, Robert M. R.	Influence of Urbanization on Demography of Little Brown Bats (Myotis lucifugus) in the Prairies of North America	NA	Plos One	Sites are not in the bioclimatic region
WOS_5943	WOS	10.1656/045.021.0309	2014	Coleman, Laci S.; Ford, W. Mark; Dobony, Christopher A.; Britzke, Eric R.	Comparison of Radio-telemetric Home-Range Analysis and Acoustic Detection for Little Brown Bat Habitat Evaluation	NA	Northeastern Naturalist	Sites are not in the bioclimatic region
WOS_5950	WOS	NA	2013	Coletti, Luciane D.; Michel, Thais; Sanfelice, Daniela; Jardim, Marcia M. A.	Spatial habitat use by Lontra longicaudis (Mustelidae, Carnivora) in an anthropically modified environment in Cai river, Rio Grande do Sul, Brazil	NA	Iheringia Serie Zoologia	Language is not English or French
WOS_5958	WOS	NA	2001	Collen, P.; Gibson, R. J.	The general ecology of beavers (Castor spp.), as related to their influence on stream ecosystems and riparian habitats, and the subsequent effects on fish - a review	NA	Reviews in Fish Biology and Fisheries	The document is a review
WOS_5962	WOS	10.4238/2013.November.27.1	2013	Collevatti, R. G.; Souza-Neto, A. C.; Silva-, N. J.; Telles, M. P. C.	Kin structure and parallel dispersal in the black-and-gold howler monkey Alouatta caraya (Platyrrhini, Atelidae)	NA	Genetics and Molecular Research	Sites are not in the bioclimatic region
ZR_1732	ZR	NA	1985	Collins, J. N.; Resh, V. H.	Utilization of natural and man-made habitats by the salt marsh song sparrow, Melospiza melodia samuelis (Baird).	NA	NA	Pdf cannot be obtained
WOS_6008	WOS	10.1016/j.envpol.2008.06.032	2009	Collins, Sara J.; Russell, Ronald W.	Toxicity of road salt to Nova Scotia amphibians	NA	Environmental Pollution	Sites are not in the bioclimatic region
WOS_6009	WOS	NA	1997	Collins, W. B.; Helm, D. J.	Moose, Alces alces, habitat relative to riparian succession in the boreal forest, Susitna River, Alaska	NA	Canadian Field-Naturalist	Sites are not in the bioclimatic region
WOS_6012	WOS	10.3356/0892-1016(2007)41[130:TSAFHO]2.0.CO;2	2007	Collister, Douglas M.; Wilson, Scott	Territory size and foraging habitat of Loggerhead Shrikes (Lanius ludovicianus) in southeastern Alberta	NA	Journal of Raptor Research	Sites are not in the bioclimatic region
ACTU_WOS_T_3748	WOS	10.1007/s00300-016-1960-8	2017	Colman, JE; Bergmo, T; Tsegaye, D; Flydal, K; Eftestol, S; Lilleeng, MS; Moe, SR	Wildlife response to infrastructure: the problem with confounding factors	NA	NA	Sites are not in the bioclimatic region
ACTU_WOS_T_9372	WOS	10.1007/s10344-015-0965-x	2015	Colman, JE; Tsegaye, D; Flydal, K; Rivrud, IM; Reimers, E; Eftestol, S	High-voltage power lines near wild reindeer calving areas	NA	NA	Sites are not in the bioclimatic region
ZR_11661	ZR	NA	2015	Colman, Jonathan E.; Tsegaye, Diress; Flydal, Kjetil; Rivrud, Inger Maren; Reimers, Eigil; Eftestol, Sindre	High-voltage power lines near wild reindeer calving areas.	NA	NA	Sites are not in the bioclimatic region
WOS_6044	WOS	10.1111/j.1523-1739.2007.00674.x	2007	Compton, Bradley W.; McGarigal, Kevin; Cushman, Samuel A.; Gamble, Lloyd R.	A resistant-kernel model of connectivity for amphibians that breed in vernal pools	NA	Conservation Biology	The study type is inappropriate (no data, simulation, recommendation)
WOS_6064	WOS	10.1656/1528-7092(2004)003[0669:WOFSZA]2.0.CO;2	2004	Conner, R. N.; Dickson, J. G.; Williamson, J. H.; Ortego, B. N.	Width of forest streamside zones and breeding bird abundance in eastern Texas	NA	Southeastern Naturalist	The document meets exclusion criteria for waterways
WOS_6073	WOS	10.1674/0003-0031(2000)143[0053:MOZDTV]2.0.CO;2	2000	Connors, L. M.; Kiviat, E.; Groffman, P. M.; Ostfeld, R. S.	Muskrat (Ondatra zibethicus) disturbance to vegetation and potential net nitrogen mineralization and nitrification rates in a freshwater tidal marsh	NA	American Midland Naturalist	Sites are not in the bioclimatic region
ACTU_WOS_F_2091	WOS	10.1111/bij.12808	2016	Conroy, CJ; Patton, JL; Lim, MCW; Phuong, MA; Parmenter, B; Hohna, S	Following the rivers: historical reconstruction of California voles Microtus californicus (Rodentia: Cricetidae) in the deserts of eastern California	NA	NA	The document does not dealt with our 6 specific questions
WOS_6093	WOS	10.2307/3802708	2003	Conway, C. J.; Simon, J. C.	Comparison of detection probability associated with burrowing owl survey methods	NA	Journal of Wildlife Management	Sites are not in the bioclimatic region
WOS_6104	WOS	NA	2003	Conway, W. C.; Smith, L. M.; Ray, J. D.	Breeding biology of an interior least tern (Sterna antillarum athalassos) colony in Childress County of North Texas	NA	Texas Journal of Science	Sites are not in the bioclimatic region
WOS_6124	WOS	10.3398/1527-0904(2008)68[365:IOBDDO]2.0.CO;2	2008	Cooke, Hilary A.; Zack, Steve	INFLUENCE OF BEAVER DAM DENSITY ON RIPARIAN AREAS AND RIPARIAN BIRDS IN SHRUBSTEPPE OF WYOMING	NA	Western North American Naturalist	Sites are not in the bioclimatic region
WOS_6125	WOS	10.1007/s00267-008-9160-0	2009	Cooke, Hilary A.; Zack, Steve	Use of Standardized Visual Assessments of Riparian and Stream Condition to Manage Riparian Bird Habitat in Eastern Oregon	NA	Environmental Management	The document meets exclusion criteria for waterways
WOS_6207	WOS	NA	2013	Cormier, Renee L.; Gardali, Thomas; Wood, Julian K.	ASSESSING MIGRATORY STOPOVER SITE QUALITY FOR BIRDS DURING FALL MIGRATION ALONG TWO CALIFORNIA RIVERS	NA	Western North American Naturalist	The document meets previous screening exclusion criteria (Outcome)
ZR_1820	ZR	NA	2001	Corrigan, Rob	Survey of the peregrine falcon (Falco peregrinus anatum) in Alberta.	NA	NA	Sites are not in the bioclimatic region
ACTU_ZR_T_403	ZR	NA	2017	Cosgrove, P.; Kortland, K.; Shields, D.; Potter, R.; Murray, J.; Cosgrove, C.	Response of incubating Golden and White-tailed Eagles to forest road traffic: results of a pilot study.	NA	NA	The document meets previous screening exclusion criteria (Exposure)
WOS_6283	WOS	10.1111/j.1752-4571.2012.00238.x	2012	Cote, Heloise; Garant, Dany; Robert, Karine; Mainguy, Julien; Pelletier, Fanie	Genetic structure and rabies spread potential in raccoons: the role of landscape barriers and sex-biased dispersal	NA	Evolutionary Applications	Sites are not in the bioclimatic region
WOS_6284	WOS	10.1139/cjfr-31-10-1805	2001	Cote, M.; Ferron, J.	Short-term use of different residual forest structures by three sciurid species in a clear-cut boreal landscape	NA	Canadian Journal of Forest Research-Revue Canadienne De Recherche Forestiere	Sites are not in the bioclimatic region
WOS_6288	WOS	10.1002/jwmg.197	2011	Cotner, Lisa A.; Schooley, Robert L.	Habitat Occupancy by Riparian Muskrats Reveals Tolerance to Urbanization and Invasive Vegetation	NA	Journal of Wildlife Management	Sites are not in the bioclimatic region
WOS_6294	WOS	NA	2010	Cott, Peter A.; Zajdlik, Barry A.; Bourassa, Kelly J.; Lange, Marc; Gordon, Andrew M.	Effects of Forest Fire on Young-of-the-year Northern Pike, Esox lucius, in the Northwest Territories	NA	Canadian Field-Naturalist	Sites are not in the bioclimatic region
WOS_6310	WOS	10.2307/1521557	1993	COULTER, MC; BRYAN, AL	FORAGING ECOLOGY OF WOOD STORKS (MYCTERIA-AMERICANA) IN EAST-CENTRAL GEORGIA .1. CHARACTERISTICS OF FORAGING SITES	NA	Colonial Waterbirds	The document meets previous screening exclusion criteria (Exposure)
ACTU_WOS_T_1812	WOS	NA	2017	Covaciu-Marcov, SD; Ferenti, S; Urak, I; Sas-Kovacs, EH; Cicort-Lucaciu, AS; Sas-Kovacs, I	After the last train passes: data on the fauna from abandoned railway tunnels in Romania	NA	NA	The comparator is inappropriate
ZR_11735	ZR	NA	2006	Covaciu-Marcov, Severus-Daniel; Bogdan, Horia V.; Ferenti, Sara	Notes regarding the presence of some Podarcis muralis (Laurenti 1768) populations on the railroads of western Romania.	NA	NA	There is no comparator
ZR_11736	ZR	NA	2011	Covaciu-Marcov, Severus-Daniel; Ferenti, Sara; Citrea, Luminita; Cupsa, Diana; Condure, Natalia	Food composition of three Bombina variegata populations from Valsan River Protected Natural Area (Romania).	NA	NA	The document meets previous screening exclusion criteria (Outcome)
ACTU_WOS_F_1152	WOS	10.1111/emr.12258	2017	Craig, MD; White, DA; Stokes, VL; Prince, J	Can postmining revegetation create habitat for a threatened mammal?	NA	NA	Sites are not in the bioclimatic region
WOS_6378	WOS	10.1371/journal.pone.0107178	2014	Crane, Mason J.; Lindenmayer, David B.; Cunningham, Ross B.	The Value of Countryside Elements in the Conservation of a Threatened Arboreal Marsupial Petaurus norfolcensis in Agricultural Landscapes of South-Eastern Australia-The Disproportional Value of Scattered Trees	NA	Plos One	Sampling points are not on verges (exposure)
WOS_6385	WOS	10.1111/1365-2664.12195	2014	Crawford, Brian A.; Maerz, John C.; Nibbelink, Nathan P.; Buhlmann, Kurt A.; Norton, Terry M.; Albeke, Shannon E.	Hot spots and hot moments of diamondback terrapin road- crossing activity	NA	Journal of Applied Ecology	The document meets previous screening exclusion criteria (Outcome)
WOS_6390	WOS	10.1111/j.1523-1739.2006.00556.x	2007	Crawford, John A.; Semlitsch, Raymond D.	Estimation of core terrestrial habitat for stream-breeding salamanders and delineation of riparian buffers for protection of biodiversity	NA	Conservation Biology	The document meets exclusion criteria for waterways
WOS_6389	WOS	10.1016/j.foreco.2007.12.005	2008	Crawford, John A.; Semlitsch, Raymond D.	Abiotic factors influencing abundance and microhabitat use of stream salamanders in southern Appalachian forests	NA	Forest Ecology and Management	The document meets exclusion criteria for waterways
WOS_6418	WOS	10.1016/j.ygcen.2011.06.001	2011	Crino, O. L.; Van Oorschot, B. Klaassen; Johnson, E. E.; Malisch, J. L.; Breuner, C. W.	Proximity to a high traffic road: Glucocorticoid and life history consequences for nestling white-crowned sparrows	NA	General and Comparative Endocrinology	Sites are not in the bioclimatic region
WOS_6419	WOS	10.1242/jeb.081109	2013	Crino, Ondi L.; Johnson, Erin E.; Blickley, Jessica L.; Patricelli, Gail L.; Breuner, Creagh W.	Effects of experimentally elevated traffic noise on nestling white-crowned sparrow stress physiology, immune function and life history	NA	Journal of Experimental Biology	Sites are not in the bioclimatic region
ZR_1879	ZR	10.1660/062.113.0303	2010	Crisler, James D.; Russell, F. Leland	Patterns in beaver herbivory in south-central Kansas riparian woodlands.	NA	NA	The document meets previous screening exclusion criteria (Outcome)
WOS_6431	WOS	NA	2005	Cristol, D. A.	Walnut-caching behavior of American crows	NA	Journal of Field Ornithology	The comparator is inappropriate
ACTU_WOS_F_4199	WOS	10.1007/978-3-662-44034-6_15	2015	Crnobrnja-Isailovic, J; Adrovic, A; Caleta, M; Cosic, N; Jelic, D; Kotrosan, D; Lisicic, D; Marinkovic, S; Poboljsaj, K; Presetnik, P; Sekulic, G	Fauna of the Riparian Ecosystems: Amphibians, Reptiles, Birds, and Mammals	NA	NA	The document is a review
ZR_11772	ZR	NA	1989	Crome, F. H. J.; Moore, L. A.	Display site constancy of bowerbirds and the effects of logging on Mt. Windsor Tableland, north Queensland.	NA	NA	Sites are not in the bioclimatic region
ZR_1883	ZR	NA	1994	Crome, Francis; Isaacs, Jodi; Moore, Les	The utility to birds and mammals of remnant riparian vegetation and associated windbreaks in the tropical Queensland uplands.	NA	NA	The document meets exclusion criteria for waterways
ZR_11775	ZR	NA	1994	Crooks, Kevin R.	Den-site selection in the island spotted skunk of Santa Cruz Island, California.	NA	NA	Results are in an unexploitable format
WOS_6447	WOS	10.1894/CJ-146.1	2008	Crooks, Kevin R.; Grigione, Melissa; Scoville, Alison; Scoville, Gerald	EXPLORATORY USE OF TRACK AND CAMERA SURVEYS OF MAMMALIAN CARNIVORES IN THE PELONCILLO AND CHIRICAHUA MOUNTAINS OF SOUTHEASTERN ARIZONA	NA	Southwestern Naturalist	Sites are not in the bioclimatic region
WOS_6449	WOS	10.1007/BF02589628	1991	CROONQUIST, MJ; BROOKS, RP	USE OF AVIAN AND MAMMALIAN GUILDS AS INDICATORS OF CUMULATIVE IMPACTS IN RIPARIAN WETLAND AREAS	NA	Environmental Management	Sites are not in the bioclimatic region
WOS_6448	WOS	NA	1993	CROONQUIST, MJ; BROOKS, RP	EFFECTS OF HABITAT DISTURBANCE ON BIRD COMMUNITIES IN RIPARIAN CORRIDORS	NA	Journal of Soil and Water Conservation	Pdf cannot be obtained
WOS_6454	WOS	10.1007/s10592-008-9772-1	2009	Crosby, M. Kathrine A.; Licht, Lawrence E.; Fu, Jinzhong	The effect of habitat fragmentation on finescale population structure of wood frogs (Rana sylvatica)	NA	Conservation Genetics	Sites are not in the bioclimatic region
WOS_6458	WOS	10.1007/s10530-011-0031-x	2011	Crossland, Michael; Brown, Gregory; Shine, Richard	The enduring toxicity of road-killed cane toads (Rhinella marina)	NA	Biological Invasions	Sites are not in the bioclimatic region
WOS_6474	WOS	10.1098/rspb.2012.0727	2012	Crowley, Brooke E.; Godfrey, Laurie R.; Guilderson, Thomas P.; Zermeno, Paula; Koch, Paul L.; Dominy, Nathaniel J.	Extinction and ecological retreat in a community of primates	NA	Proceedings of the Royal Society B-Biological Sciences	Sites are not in the bioclimatic region
ACTU_ZR_T_909	ZR	NA	2016	Crump, Paul S.; Robertson, Stirling J.; Rommel-Crump, Rachel E.	HIGH INCIDENCE OF ROAD-KILLED FRESHWATER TURTLES AT A LAKE IN EAST TEXAS, USA.	NA	NA	The document meets previous screening exclusion criteria (Outcome)
ACTU_ZR_F_235	ZR	NA	2017	Cruz Garcia, Francisco; Contreras Balderas, Armando Jesus; Nava Castillo, Rigel; Gallo Reynoso, Juan Pablo	Habitat and abundance of the Neotropical otter (Lontra longicaudis annectens) in Pueblo Nuevo, Durango, Mexico.	NA	NA	The comparator is inappropriate
WOS_6491	WOS	NA	2011	Cruz, Bruna Botti; Piratelli, Augusto Joao	Avifauna associated to an urban extend of the Sorocaba River, Southeastern Brazil	NA	Biota Neotropica	Language is not English or French
WOS_6500	WOS	NA	2003	Cryan, P. M.; Bogan, M. A.	Recurrence of Mexican long-tongued bats (Choeronycteris mexicana) at historical sites in Arizona and New Mexico	NA	Western North American Naturalist	The document meets exclusion criteria for waterways
WOS_6503	WOS	10.1007/s10344-013-0710-2	2013	Cserkesz, Tamas; Ottlecz, Barnabas; Cserkesz-Nagy, Agnes; Farkas, Janos	Interchange as the main factor determining wildlife-vehicle collision hotspots on the fenced highways: spatial analysis and applications	NA	European Journal of Wildlife Research	The document meets previous screening exclusion criteria (Outcome)
ZR_1916	ZR	NA	2011	Cuevas, Maria Fernanda; Chillo, Veronica; Marchetta, Ariadna; Ojeda, Ricardo A.	Mammalia, Lagomorpha, Leporidae, Oryctolagus cuniculus Linneaus, 1758: New record and its potential dispersal corridors for northern Mendoza, Argentina.	NA	NA	Sites are not in the bioclimatic region
ZR_11791	ZR	NA	2005	Cui, Qinghu; Jiang, Zhigang; Lian, Xinming; Zgang, Tongzuo; Su, Jianping	Factors influencing habitat selection of root voles (Microtus oeconomus).	NA	NA	Pdf cannot be obtained
WOS_6562	WOS	10.2307/2426575	1994	CUMMINGS, JR; VESSEY, SH	AGRICULTURAL INFLUENCES ON MOVEMENT PATTERNS OF WHITE-FOOTED MICE (PEROMYSCUS-LEUCOPUS)	NA	American Midland Naturalist	Sites are not in the bioclimatic region
WOS_6580	WOS	10.1656/1092-6194(2006)13[583:POBCAW]2.0.CO;2	2006	Cunningham, Jesse M.; Calhoun, Aram J. K.; Glanz, William E.	Patterns of beaver colonization and wetland change in Acadia National Park	NA	Northeastern Naturalist	Sites are not in the bioclimatic region
ACTU_WOS_T_9003	WOS	10.1111/ddi.12381	2016	Cunningham, SJ; Madden, CF; Barnard, P; Amar, A	Electric crows: powerlines, climate change and the emergence of a native invader	NA	NA	The document meets previous screening exclusion criteria (Exposure)
WOS_6583	WOS	10.1111/j.1469-1795.2012.00598.x	2013	Cunnington, G. M.; Fahrig, L.	Mate attraction by male anurans in the presence of traffic noise	NA	Animal Conservation	Sites are not in the bioclimatic region
WOS_6584	WOS	10.1016/j.actao.2010.06.002	2010	Cunnington, Glenn M.; Fahrig, Lenore	Plasticity in the vocalizations of anurans in response to traffic noise	NA	Acta Oecologica-International Journal of Ecology	Sites are not in the bioclimatic region
WOS_6610	WOS	10.2193/0022-541X(2004)068[0278:HFABOA]2.0.CO;2	2004	Curtis, P. D.; Jensen, P. G.	Habitat features affecting beaver occupancy along roadsides in New York state	NA	Journal of Wildlife Management	Sites are not in the bioclimatic region
ZR_1937	ZR	NA	2004	Cuti, Natalino	Biology of penduline tit in an area of Sicily.	NA	NA	Language is not English or French
WOS_6624	WOS	10.2193/2007-576	2009	Cypher, Brian L.; Bjurlin, Curtis D.; Nelson, Julia L.	Effects of Roads on Endangered San Joaquin Kit Foxes	NA	Journal of Wildlife Management	Sites are not in the bioclimatic region
ACTU_WOS_T_814	WOS	10.1111/aec.12549	2018	da Rosa, CA; Secco, H; Carvalho, N; Maia, AC; Bager, A	Edge effects on small mammals: Differences between arboreal and ground-dwelling species living near roads in Brazilian fragmented landscapes	NA	NA	Sites are not in the bioclimatic region
WOS_6659	WOS	NA	2011	da Silva Freitas, Tiago Magalhaes; da Consolacao Almeida, Vitor Hudson; Valente, Roberta de Melo; de Assis Montag, Luciano Fogaca	Feeding ecology of Auchenipterichthys longimanus (Siluriformes: Auchenipteridae) in a riparian flooded forest of Eastern Amazonia, Brazil	NA	Neotropical Ichthyology	Sites are not in the bioclimatic region
ACTU_WOS_T_596	WOS	10.1002/ece3.3808	2018	D'Acunto, LE; Pauli, BP; Moy, M; Johnson, K; Abu-Omar, J; Zollner, PA	Timing and technique impact the effectiveness of road-based, mobile acoustic surveys of bats	NA	NA	Sites are not in the bioclimatic region
WOS_6700	WOS	10.1007/s10344-007-0103-5	2008	Dahle, Bjorn; Reimers, Eigil; Colman, Jonathan E.	Reindeer (Rangifer tarandus) avoidance of a highway as revealed by lichen measurements	NA	European Journal of Wildlife Research	Sites are not in the bioclimatic region
WOS_6707	WOS	10.1111/j.1526-100X.1995.tb00172.x	1995	DAHM, CN; CUMMINS, KW; VALETT, HM; COLEMAN, RL	AN ECOSYSTEM VIEW OF THE RESTORATION OF THE KISSIMMEE RIVER	NA	Restoration Ecology	The study type is inappropriate (no data, simulation, recommendation)
ZR_11832	ZR	NA	2005	Dai, Jian-hong; Dai, Qiang; Zhang, Ming; Zhang, Jin-dong; Li, Cheng; Liu, Bing; Liu, Zhi-jun; Wang, Yue-zhao	Habitat selection of three amphibians (Rana kukunoris, Nanorana pleskei, Bufo minshanicus) during summer-autumn in Zoige Wetland National Nature Reserve.	NA	NA	Language is not English or French
WOS_6715	WOS	NA	2011	Dai, Qiang; Wang, Yuezhao	EFFECT OF ROAD ON THE DISTRIBUTION OF AMPHIBIANS IN WETLAND AREA - TEST WITH MODEL-AVERAGED PREDICTION	NA	Polish Journal of Ecology	Sites are not in the bioclimatic region
ZR_11834	ZR	NA	2006	Dai, Qiang; Yuan, Zuoping; Zhang, Jindong; Yang, Yong; Zhang, Ming; Zhang, Qiang; Gu, Haijun; Liu, Zhijun; Jian, Yi; Wang, Yuezhao	Road and road construction effects on habitat use of small mammals and birds in Zoige alpine wetland.	NA	NA	Language is not English or French
WOS_6729	WOS	10.1163/15685381-00002956	2014	Dalbeck, Lutz; Janssen, Joyce; Voelsgen, Sophie Luise	Beavers (Castor fiber) increase habitat availability, heterogeneity and connectivity for common frogs (Rana temporaria)	NA	Amphibia-Reptilia	The document meets previous screening exclusion criteria (Exposure)
EM_138	GREY_LITT_email_request	NA	2011	Dallet, Solène	Comment prendre en compte le maintien des populations de lézards vivipares dans le plan de gestion de la tourbière des Narcettes (Ardèche)?	NA	NA	The study type is inappropriate (no data, simulation, recommendation)
WOS_6747	WOS	10.1111/j.1472-4642.2012.00891.x	2012	Dallimer, Martin; Rouquette, James R.; Skinner, Andrew M. J.; Armsworth, Paul R.; Maltby, Lorraine M.; Warren, Philip H.; Gaston, Kevin J.	Contrasting patterns in species richness of birds, butterflies and plants along riparian corridors in an urban landscape	NA	Diversity and Distributions	The comparator is inappropriate
ACTU_WOS_T_10254	WOS	10.1002/jwmg.900	2015	D'Amico, M; Clevenger, AP; Roman, J; Revilla, E	General versus specific surveys: Estimating the suitability of different road-crossing structures for small mammals	NA	NA	Sites are not in the bioclimatic region
ACTU_WOS_T_7575	WOS	10.1111/1365-2664.12572	2016	D'Amico, M; Periquet, S; Roman, J; Revilla, E	Road avoidance responses determine the impact of heterogeneous road networks at a regional scale	NA	NA	The comparator is inappropriate
ZR_11850	ZR	NA	2013	D'Amico, Marcello; Rouco, Carlos; Russell, James C.; Roman, Jacinto; Revilla, Eloy	INVADERS ON THE ROAD: SYNANTHROPIC BIRD FORAGING ALONG HIGHWAYS.	NA	NA	The comparator is inappropriate
WOS_6774	WOS	10.1007/s10530-009-9438-z	2010	D'Amore, Antonia; Hemingway, Valentine; Wasson, Kerstin	Do a threatened native amphibian and its invasive congener differ in response to human alteration of the landscape?	NA	Biological Invasions	Sampling points are not on verges (exposure)
ZR_11853	ZR	NA	2015	Dananay, Kacey L.; Krynak, Katherine L.; Krynak, Timothy J.; Benard, Michael F.	Legacy of road salt: Apparent positive larval effects counteracted by negative postmetamorphic effects in wood frogs.	NA	NA	Sites are not in the bioclimatic region
WOS_6811	WOS	10.1007/BF02703186	1994	DANIELS, RJR	A LANDSCAPE APPROACH TO CONSERVATION OF BIRDS	NA	Journal of Biosciences	Sites are not in the bioclimatic region
ZR_11859	ZR	NA	2007	Danko, Stefan; Balla, Milos	Unusual cases of nesting by the imperial eagle (Aquila heliaca) in eastern Slovakia.	NA	NA	The comparator is inappropriate
ZR_1985	ZR	NA	2007	Danko, Stefan; Mihok, Jozef; Liptak, Jan; Pcola, Stefan; Balla, Milos	Breeding of the black kite (Milvus migrans) in Eastern Slovakia.	NA	NA	Language is not English or French
ACTU_WOS_F_1084	WOS	10.1111/jeb.13065	2017	Danner, JE; Fleischer, RC; Danner, RM; Moore, IT	Genetic population structure in an equatorial sparrow: roles for culture and geography	NA	NA	The comparator is inappropriate
ZR_1987	ZR	NA	2005	Danzer, Shelley	Characterization of Mexican spotted owl (Strix occidentalis lucida) habitat in Madrean Sky Island ecosystems.	NA	NA	Sites are not in the bioclimatic region
ACTU_WOS_T_337	WOS	NA	2018	Dar, PA; Reshi, ZA; Shah, AB	Attitudinal distribution of native and alien plant species along roadsides in Kashmir Himalaya, India	NA	NA	Sites are not in the bioclimatic region
ACTU_WOS_F_812	WOS	10.1016/j.ecoleng.2016.06.001	2017	Darrah, AJ; Greeney, HF; van Riper, C	Importance of the 2014 Colorado River Delta pulse flow for migratory songbirds: Insights from foraging behavior	NA	NA	Sites are not in the bioclimatic region
ACTU_WOS_F_228	WOS	10.1007/s10530-017-1569-z	2018	Darrah, AJ; van Riper, C	Riparian bird density decline in response to biocontrol of &ITTamarix&IT from riparian ecosystems along the Dolores River in SW Colorado, USA	NA	NA	Sites are not in the bioclimatic region
WOS_6855	WOS	10.2307/3809117	1995	DARVEAU, M.; BEAUCHESNE, P.; BELANGER, L.; HUOT, J.; LARUE, P.	RIPARIAN FOREST STRIPS AS HABITAT FOR BREEDING BIRDS IN BOREAL FOREST	NA	Journal of Wildlife Management	Sites are not in the bioclimatic region
WOS_6856	WOS	NA	1997	Darveau, M.; Belanger, L.; Huot, J.; Melancon, E.; DeBellefeuille, S.	Forestry practices and the risk of bird nest predation in a boreal coniferous forest	NA	Ecological Applications	Sites are not in the bioclimatic region
WOS_6859	WOS	10.1016/S0378-1127(00)00509-0	2001	Darveau, M.; Labbe, P.; Beauchesne, P.; Belanger, L.; Huot, J.	The use of riparian forest strips by small mammals in a boreal balsam fir forest	NA	Forest Ecology and Management	Sites are not in the bioclimatic region
ACTU_WOS_T_12295	WOS	10.1080/10871209.2014.937017	2015	Dasgupta, S; Ghosh, AK	Elephant-Railway Conflict in a Biodiversity Hotspot: Determinants and Perceptions of the Conflict in Northern West Bengal, India	NA	NA	Sites are not in the bioclimatic region
ZR_11886	ZR	NA	2004	Davey, Chris; Purchase, David	A survey of the superb parrot Polytelis swainsonii and potential nesting tree hollows along roads of the southwestern slopes, New South Wales.	NA	NA	Pdf cannot be obtained
WOS_6899	WOS	10.1111/1365-2664.12178	2014	David, Bruno O.; Tonkin, Jonathan D.; Taipeti, Kristopher W. T.; Hokianga, Hayden T.	Learning the ropes: mussel spat ropes improve fish and shrimp passage through culverts	NA	Journal of Applied Ecology	The study type is inappropriate (no data, simulation, recommendation)
ACTU_WOS_T_62	WOS	NA	2018	David, S; Monica, C; Ramiro, Z; Pablo, B	Herbaceous Community Structure in Areas with Forest Plantations	NA	NA	Language is not English or French
WOS_6904	WOS	10.2307/3802913	2001	Davidson, A. S.; Knight, R. L.	Avian nest success and community composition in a western riparian forest	NA	Journal of Wildlife Management	Sites are not in the bioclimatic region
WOS_6927	WOS	NA	1994	DAVIES, PE; NELSON, M.	RELATIONSHIPS BETWEEN RIPARIAN BUFFER WIDTHS AND THE EFFECTS OF LOGGING	NA	Australian Journal of Marine and Freshwater Research	The document meets exclusion criteria for waterways
WOS_6933	WOS	10.1111/j.1095-8649.2010.02541.x	2010	Davis, A. M.; Pusey, B. J.; Thorburn, D. C.; Dowe, J. L.; Morgan, D. L.; Burrows, D.	Riparian contributions to the diet of terapontid grunters (Pisces: Terapontidae) in wet-dry tropical rivers	NA	Journal of Fish Biology	Sites are not in the bioclimatic region
WOS_6959	WOS	10.1111/j.1469-1795.2010.00389.x	2011	Davis, M. L.; Kelly, M. J.; Stauffer, D. F.	Carnivore co-existence and habitat use in the Mountain Pine Ridge Forest Reserve, Belize	NA	Animal Conservation	Sites are not in the bioclimatic region
ACTU_WOS_T_419	WOS	10.1111/aec.12553	2018	Dawson, SJ; Adams, PJ; Moseby, KE; Waddington, KI; Kobryn, HT; Bateman, PW; Fleming, PA	Peak hour in the bush: linear anthropogenic clearings funnel predator and prey species	NA	NA	Sites are not in the bioclimatic region
ACTU_WOS_F_1828	WOS	10.1016/j.jnc.2016.08.007	2016	de Almeida, A; Marques, MCM; Ceccon-Valente, MD; Vicente-Silva, J; Mikich, SB	Limited effectiveness of artificial bird perches for the establishment of seedlings and the restoration of Brazil's Atlantic Forest	NA	NA	The document meets previous screening exclusion criteria (Outcome)
WOS_6997	WOS	10.1007/s10750-014-2099-7	2015	de Almeida, Alexandre Pinheiro; Rodrigues, Domingos de Jesus; Garey, Michel Varajao; Menin, Marcelo	Tadpole richness in riparian areas is determined by niche-based and neutral processes	NA	Hydrobiologia	Sites are not in the bioclimatic region
ZR_11913	ZR	NA	2004	de Baerdemaeker, Andre	The city of Rotterdam as breeding and wintering habitat for the Eurasian sparrowhawk Accipiter nisus.	NA	NA	Language is not English or French
WOS_7010	WOS	10.1080/00222933.2010.520756	2011	de Barros, Fabio Monteiro; Monteiro Granzinolli, Marco Antonio; Garcia Pereira, Ricardo Jose; Motta-Junior, Jose Carlos	Home range and habitat use by the roadside hawk, Rupornis magnirostris (Gmelin, 1788) (Aves: Falcaniformes) in southeastern Brazil	NA	Journal of Natural History	Sites are not in the bioclimatic region
WOS_7024	WOS	10.1590/1676-06032014007414	2014	de Carvalho, Israel Dias; de Oliveira, Rildo; Pires, Alexandra dos Santos	Medium and large-sized mammals of the Reserva Ecologica de Guapiacu, Cachoeiras de Macacu, RJ	NA	Biota Neotropica	The document meets previous screening exclusion criteria (Exposure)
WOS_7026	WOS	10.1590/1678-4766201410414349	2014	de Carvalho, Naira C.; Bordignon, Marcelo O.; Shapiro, Julie T.	Fast and furious: a look at the death of animals on the highway MS-080, Southwestern Brazil	NA	Iheringia Serie Zoologia	Sites are not in the bioclimatic region
WOS_7044	WOS	NA	2011	de Fraga, Rafael; Lima, Albertina Pimentel; Magnusson, William Ernest	Mesoscale spatial ecology of a tropical snake assemblage: the width of riparian corridors in central Amazonia	NA	Herpetological Journal	Sites are not in the bioclimatic region
WOS_7045	WOS	10.1643/CE-11-098	2013	De Fraga, Rafael; Magnusson, William E.; Abrahao, Carlos R.; Sanaiotti, Tania; Lima, Albertina P.	Habitat Selection by Bothrops atrox (Serpentes: Viperidae) in Central Amazonia, Brazil	NA	Copeia	Sites are not in the bioclimatic region
ZR_2096	ZR	NA	1991	de Geus, D. W.; Bowles, J. B.	Relative abundance of eastern screech-owls in a south-central Iowa township.	NA	NA	Sites are not in the bioclimatic region
ACTU_WOS_T_7277	WOS	NA	2016	De La Cruz, JL; Ward, RL	Summer-Habitat Suitability Modeling of Myotis sodalis (Indiana Bat) in the Eastern Mountains of West Virginia	NA	NA	The comparator is inappropriate
WOS_7096	WOS	NA	2012	de los Milagros Rodriguez-Parga, Luz; Contreras-Martinez, Sarahy; Rost, Josep; Cruz Gomez-Lamas, Jose	Seasonal abundance, reproductive phenology and site fidelity in riparian environments of the Blue Mockingbird (Melanotis caerulescens) in southwestern Jalisco	NA	Revista Mexicana De Biodiversidad	Language is not English or French
ZR_11992	ZR	NA	2015	de Nie, Henrik	How far can Hobbies Falco subbuteo stray from the natal site during the post-fledging period?	NA	NA	Language is not English or French
WOS_7120	WOS	10.4322/natcon.2014.011	2014	de Oliveira Ramos, Camila Crispim; dos Anjos, Luiz	The width and biotic integrity of riparian forests affect richness, abundance, and composition of bird communities	NA	Natureza & Conservacao	Sites are not in the bioclimatic region
ZR_2170	ZR	NA	2010	de Oliveira, Francisco Fonseca Ribeiro; Eterovick, Paula Cabral	PATTERNS OF SPATIAL DISTRIBUTION AND MICROHABITAT USE BY SYNTOPIC ANURAN SPECIES ALONG PERMANENT LOTIC ECOSYSTEMS IN THE CERRADO OF SOUTHEASTERN BRAZIL.	NA	NA	Sites are not in the bioclimatic region
ACTU_WOS_F_1665	WOS	10.1177/1940082917697263	2017	de Oliveira, HFM; de Camargo, CF; Gager, Y; Aguiar, LMS	The Response of Bats (Mammalia: Chiroptera) to Habitat Modification in a Neotropical Savannah	NA	NA	Sites are not in the bioclimatic region
ZR_2171	ZR	NA	2015	de Oliveira, Leonardo Queiroz; Marciente, Rodrigo; Magnusson, William E.; Bobrowiec, Paulo Estefano D.	Activity of the insectivorous bat Pteronotus parnellii relative to insect resources and vegetation structure.	NA	NA	Sites are not in the bioclimatic region
WOS_7129	WOS	10.1071/AM12046	2014	de Oliveira, S. M.; Murray, P. J.; de Villiers, D. L.; Baxter, G. S.	Ecology and movement of urban koalas adjacent to linear infrastructure in coastal south-east Queensland	NA	Australian Mammalogy	There is no comparator
ACTU_WOS_F_1640	WOS	10.3897/zoologia.34.e11921	2017	de Pinho, FF; Ferreira, GB; Paglia, AP	Influence of vegetation physiognomy, elevation and fire frequency on medium and large mammals in two protected areas of the Espinhaco Range	NA	NA	Sites are not in the bioclimatic region
EM_145_1	GREY_LITT_email_request	NA	2008	de Redon de Colombier, Louis	Interets ecologiques des bords de route en milieu agricole intensif	Louis de REDON1*; Frédéric JIGUET1; Isabelle LE VIOL1; Sophie GACHET2; Jeffrey B. JOY3 and Nathalie MACHON1. Plant diversity in agrarian landscapes: Ecological roles of roadside verges as refugia and corridors; Submitted to Acta Oecologica.	NA	Pdf cannot be obtained
EM_145_3	GREY_LITT_email_request	NA	2008	de Redon de Colombier, Louis	Interets ecologiques des bords de route en milieu agricole intensif	Louis de REDONa*, Frédéric JIGUETa,1, Jeffrey B. JOYb,2 and Nathalie MACHONa,3. Effect of delayed single mowing on roadsides vegetation communities: A three years study; Submitted to Journal of Environnemental Management.	NA	Pdf cannot be obtained
WOS_7152	WOS	10.1002/rra.1410	2011	De Souza, A. M.; Eterovick, P. C.	ENVIRONMENTAL FACTORS RELATED TO ANURAN ASSEMBLAGE COMPOSITION, RICHNESS AND DISTRIBUTION AT FOUR LARGE RIVERS UNDER VARIED IMPACT LEVELS IN SOUTHEASTERN BRAZIL	NA	River Research and Applications	Sites are not in the bioclimatic region
WOS_7161	WOS	NA	2011	De Steven, Diane; Lowrance, Richard	Agricultural conservation practices and wetland ecosystem services in the wetland-rich Piedmont-Coastal Plain region	NA	Ecological Applications	The document is a review
WOS_7185	WOS	10.2989/00306520309485391	2003	Dean, W. R. J.; Milton, S.	The importance of roads and road verges for raptors and crows in the Succulent and Nama-Karoo, South Africa	NA	Ostrich	Sites are not in the bioclimatic region
WOS_7190	WOS	10.1016/0378-1127(90)90205-P	1990	DEBANO, LF; SCHMIDT, LJ	POTENTIAL FOR ENHANCING RIPARIAN HABITATS IN THE SOUTHWESTERN UNITED-STATES WITH WATERSHED PRACTICES	NA	Forest Ecology and Management	Sites are not in the bioclimatic region
ACTU_ZR_T_1021	ZR	NA	2016	Deffaci, Angela Camila; da Silva, Vania Patricia; Hartmann, Marilia Teresinha; Hartmann, Paulo Afonso	Diversity of birds, mammals and reptiles roadkilled in a subtropical forest region in southern Brazil.	NA	NA	Sites are not in the bioclimatic region
WOS_7242	WOS	10.1655/09-049R1.1	2011	Degregorio, Brett A.; Manning, Jennifer V.; Bieser, Nicholas; Kingsbury, Bruce A.	THE SPATIAL ECOLOGY OF THE EASTERN MASSASAUGA (SISTRURUS C-CATENATUS) IN NORTHERN MICHIGAN	NA	Herpetologica	Sites are not in the bioclimatic region
WOS_7246	WOS	10.1656/058.010.0415	2011	DeGroote, Lucas W.; Ober, Holly K.; Aldrich, James H.; Norcini, Jeff G.; Knox, Gary W.	Susceptibility of Cultivated Native Wildflowers to Deer Damage	NA	Southeastern Naturalist	Sampling points are not on verges (exposure)
ACTU_GREY_LITT_65	GREY_LITT_ITTECOP	NA	2015	Delbaere, Denis; Ehrmann, Sabine; Noteboom, Bruno; et al	En marge... Paysage et biodiversité des accotements des grandes infrasructures de transport de l’eurométropole Lille-Kortrijk-Tournai	NA	NA	The comparator is inappropriate
WOS_7320	WOS	10.1515/mamm.1991.55.4.567	1991	DELIBES, M.; MACDONALD, SM; MASON, CF	SEASONAL MARKING, HABITAT AND ORGANOCHLORINE CONTAMINATION IN OTTERS (LUTRA-LUTRA) - A COMPARISON BETWEEN CATCHMENTS IN ANDALUSIA AND WALES	NA	Mammalia	The comparator is inappropriate
ACTU_WOS_T_1370	WOS	10.1002/ps.4658	2018	Delibes-Mateos, M; Farfan, MA; Rouco, C; Olivero, J; Marquez, AL; Fa, JE; Vargas, JM; Villafuerte, R	A large-scale assessment of European rabbit damage to agriculture in Spain	NA	NA	The document meets previous screening exclusion criteria (Outcome)
ZR_11970	ZR	NA	2013	Dellinger, Justin A.; Proctor, Christine; Steury, Todd D.; Kelly, Marcella J.; Vaughan, Michael R.	Habitat selection of a large carnivore, the red wolf, in a human-altered landscape.	NA	NA	Results are in an unexploitable format
WOS_7340	WOS	NA	2005	DeLong, J. P.; Cox, S. W.; Cox, N. S.	A comparison of avian use of high- and low-elevation sites during autumn migration in central New Mexico	NA	Journal of Field Ornithology	Sites are not in the bioclimatic region
ACTU_WOS_T_1377	WOS	10.1111/1365-2656.12760	2018	DeMars, CA; Boutin, S	Nowhere to hide: Effects of linear features on predator-prey dynamics in a large mammal system	NA	NA	Sites are not in the bioclimatic region
WOS_7356	WOS	10.2307/3802629	1999	deMaynadier, P. G.; Hunter, M. L.	Forest canopy closure and juvenile emigration by pool-breeding amphibians in Maine	NA	Journal of Wildlife Management	Sites are not in the bioclimatic region
WOS_7355	WOS	NA	2000	deMaynadier, P. G.; Hunter, M. L.	Road effects on amphibian movements in a forested landscape	NA	Natural Areas Journal	Sites are not in the bioclimatic region
WOS_7360	WOS	NA	2014	Demerdzhiev, Dimitar A.	Factors Influencing Bird Mortality Caused by Power Lines within Special Protected Areas and undertaken Conservation Efforts	NA	Acta Zoologica Bulgarica	There is no comparator
WOS_7361	WOS	NA	2009	Demerdzhiev, Dimitar A.; Stoychev, Stoycho A.; Petrov, Tzeno H.; Angelov, Ivaylo D.; Nedyakov, Nedko P.	Impact of Power Lines on Bird Mortality in Southern Bulgaria	NA	Acta Zoologica Bulgarica	There is no comparator
WOS_7377	WOS	NA	2008	Demmer, Rick; Beschta, Robert L.	Recent History (1988-2004) of Beaver Dams along Bridge Creek in Central Oregon	NA	Northwest Science	The document meets exclusion criteria for waterways
ACTU_ZR_F_896	ZR	NA	2016	Denis, Pascal	The breeding bird species of the Rhine riverine forests in Alsace (northeastern France): richness, densities and relationships to habitat.	NA	NA	Pdf cannot be obtained
WOS_7453	WOS	NA	1993	DESANTO, RS; SMITH, DG	AN INTRODUCTION TO ISSUES OF HABITAT FRAGMENTATION RELATIVE TO TRANSPORTATION CORRIDORS WITH SPECIAL REFERENCE TO HIGH-SPEED RAIL (HSR)	NA	Environmental Management	The document is a review
WOS_7457	WOS	10.1016/S0167-8809(02)00177-9	2003	Deschenes, M.; Belanger, L.; Giroux, J. F.	Use of farmland riparian strips by declining and crop damaging birds	NA	Agriculture Ecosystems & Environment	Sites are not in the bioclimatic region
WOS_7474	WOS	10.5751/ACE-00521-070201	2012	Desrochers, Andre; Tardif, Jacinthe; Mazerolle, Marc J.	Use of Large Clear-Cuts by Wilson's Warbler in an Eastern Canadian Boreal Forest	NA	Avian Conservation and Ecology	Sites are not in the bioclimatic region
ACTU_WOS_T_1906	WOS	10.1371/journal.pone.0186402	2017	Deuel, NR; Conner, LM; Miller, KV; Chamberlain, MJ; Cherry, MJ; Tannenbaum, LV	Habitat selection and diurnal refugia of gray foxes in southwestern Georgia, USA	NA	NA	The comparator is inappropriate
WOS_7493	WOS	10.1046/j.1523-1739.2001.00170.x	2001	Develey, P. F.; Stouffer, P. C.	Effects of roads on movements by understory birds in mixed-species flocks in central Amazonian Brazil	NA	Conservation Biology	Sites are not in the bioclimatic region
WOS_7536	WOS	10.1111/j.1469-7998.2006.00102.x	2006	Di Bitetti, M. S.; Paviolo, A.; De Angelo, C.	Density, habitat use and activity patterns of ocelots (Leopardus pardalis) in the Atlantic Forest of Misiones, Argentina	NA	Journal of Zoology	The document meets previous screening exclusion criteria (Exposure)
ZR_12047	ZR	NA	2014	Di Bitetti, Mario S.; Paviolo, Agustin; De Angelo, Carlos	CAMERA TRAP PHOTOGRAPHIC RATES ON ROADS VS. OFF ROADS: LOCATION DOES MATTER.	NA	NA	The document meets previous screening exclusion criteria (Exposure)
ACTU_WOS_T_9782	WOS	10.1093/jmammal/gyv107	2015	Di Blanco, YE; Perez, IJ; Di Bitetti, MS	Habitat selection in reintroduced giant anteaters: the critical role of conservation areas	NA	NA	The document meets exclusion criteria for waterways
WOS_7548	WOS	NA	2009	Di Salvo, Ivy; Russo, Danilo; Sara, Maurizio	HABITAT PREFERENCES OF BATS IN A RURAL AREA OF SICILY DETERMINED BY ACOUSTIC SURVEYS	NA	Hystrix-Italian Journal of Mammalogy	The document meets exclusion criteria for waterways
WOS_7566	WOS	NA	2012	Dias Ledo, Roger Maia; de Barros, Rodrigo Meneses; Pujol-Luz, Jose Roberto	Sarcophagidae and Calliphoridae related to Rhinella schneideri (Anura, Bufonidae), Bothrops moojeni (Reptilia, Serpentes) and Mabuya frenata (Reptilia, Lacertilia) carcasses in Brasilia, Brazil	NA	Revista Brasileira De Entomologia	Sites are not in the bioclimatic region
ACTU_ZR_F_928	ZR	NA	2016	Dias, Douglas de Matos; Bocchiglieri, Adriana	Richness and habitat use by medium and large size mammals in Caatinga, northeastern Brazil.	NA	NA	Language is not English or French
ACTU_ZR_F_735	ZR	NA	2016	Dias, Douglas de Matos; Bocchiglieri, Adriana	Trophic and spatio-temporal niche of the crab-eating fox, Cerdocyon thous (Linnaeus, 1766) (Carnivora: Canidae), in a remnant of the Caatinga in northeastern Brazil.	NA	NA	Sites are not in the bioclimatic region
WOS_7568	WOS	NA	2014	Dias, Douglas de Matos; Ribeiro, Adauto de Souza; Bocchiglieri, Adriana; Pereira, Taigua Correa	DIVERSITY OF CARNIVORES (Mammalia: Carnivora) IN THE SERRA DOS MACACOS, STATE OF SERGIPE, BRAZIL	NA	Bioscience Journal	Language is not English or French
WOS_7576	WOS	10.1111/btp.12197	2015	Dias-Terceiro, Randolpho G.; Kaefer, Igor Luis; de Fraga, Rafael; de Araujo, Maria Carmozina; Simoes, Pedro Ivo; Lima, Albertina P.	A Matter of Scale: Historical and Environmental Factors Structure Anuran Assemblages from the Upper Madeira River, Amazonia	NA	Biotropica	Sites are not in the bioclimatic region
WOS_7582	WOS	NA	2013	Diaz-Sacco, Juan Jose; Izawa, Masako	Road use by the Iriomote cat (Prionailurus bengalensis iriomotensis) on Iriomote-jima Island in relation to its herpetile prey	NA	Mammal Study	Results are in an unexploitable format
ACTU_WOS_T_3728	WOS	10.1111/1365-2664.12732	2017	Dickie, M; Serrouya, R; McNay, RS; Boutin, S	Faster and farther: wolf movement on linear features and implications for hunting behaviour	NA	NA	Sites are not in the bioclimatic region
WOS_7598	WOS	10.2193/0022-541X(2005)069<0264:IOVTAR>2.0.CO;2	2005	Dickson, B. G.; Jenness, J. S.; Beier, P.	Influence of vegetation, topography, and roads on cougar movement in southern California	NA	Journal of Wildlife Management	The document meets previous screening exclusion criteria (Exposure)
WOS_7599	WOS	10.1111/j.1526-100X.2009.00590.x	2009	Dickson, Brett G.; Fleishman, Erica; Dobkin, David S.; Hurteau, Sarah R.	Relationship Between Avifaunal Occupancy and Riparian Vegetation in the Central Great Basin (Nevada, USA)	NA	Restoration Ecology	Sites are not in the bioclimatic region
WOS_7603	WOS	NA	1995	Dickson, J. G.; Williamson, J. H.; Conner, R. N.; Ortego, B.	Streamside zones and breeding birds in eastern Texas	NA	Wildlife Society Bulletin	The document meets exclusion criteria for waterways
WOS_7606	WOS	NA	2009	Didorchuk, M. V.	DYNAMICS AND STRUCTURE OF SMALL MAMMAL POPULATION IN THE MESHCHERA LOWLAND (RYAZAN REGION)	NA	Zoologichesky Zhurnal	Pdf cannot be obtained
ACTU_ZR_F_248	ZR	NA	2017	Diego Arias-Campos, Luis	Birds of Union River, Valle de El General, Costa Rica, with notes on Megaceryle torquata populations (Aves: Alcedinidae).	NA	NA	Language is not English or French
ZR_2253	ZR	NA	2004	Dieni, J. Scott; Scherr, Paulette	Roadside bias in point count surveys at Arrowwood National Wildlife Refuge, North Dakota.	NA	NA	Sites are not in the bioclimatic region
ZR_2255	ZR	10.2307/2425928	1989	Dieter, C. D.; McCabe, T. R.	Factors influencing beaver lodge-site selection on a prairie river.	NA	NA	Sites are not in the bioclimatic region
WOS_7632	WOS	10.1071/WF10060	2012	Diffendorfer, Jay; Fleming, Genie M.; Tremor, Scott; Spencer, Wayne; Beyers, Jan L.	The role of fire severity, distance from fire perimeter and vegetation on post-fire recovery of small-mammal communities in chaparral	NA	International Journal of Wildland Fire	The document meets previous screening exclusion criteria (Exposure)
ACTU_WOS_F_3380	WOS	10.3733/ca.v069n04p210	2015	DiGaudio, RT; Kreitinger, KE; Hickey, CM; Seavy, NE; Gardali, T	Private lands habitat programs benefit California's native birds	NA	NA	The document meets previous screening exclusion criteria (Exposure)
ZR_12078	ZR	10.3724/SP.J.1141.2008.00270	2008	Ding, Zhi-feng; Yuan, Ling; Zhu, Cheng-lin; Huang, Jin-wen; Zheng, Xi-qun; Guo, Xian; Lin, Jie-yu; Hu, Hui-jian; Tang, Si-xian	Nesting characteristics of yellow-bellied prinia, Prinia flaviventris.	NA	NA	Language is not English or French
WOS_7689	WOS	10.1650/CONDOR-13-163.1	2014	Dinkins, Jonathan B.; Conover, Michael R.; Kirol, Christopher P.; Beck, Jeffrey L.; Frey, Shandra Nicole	Greater Sage-Grouse (Centrocercus urophasianus) select habitat based on avian predators, landscape composition, and anthropogenic features	NA	Condor	Sites are not in the bioclimatic region
WOS_7700	WOS	10.1672/0277-5212(2002)022[0179:NEOSST]2.0.CO;2	2002	DiQuinzio, D. A.; Paton, P. W. C.; Eddleman, W. R.	Nesting ecology of Saltmarsh Sharp-Tailed Sparrows in a tidally restricted salt marsh	NA	Wetlands	The document meets previous screening exclusion criteria (Exposure)
ZR_2270	ZR	NA	2009	Dissanayaka, Umanga C.; Mahaulpatha, Dharshani W. A.	Diurnal avifaunal diversity and density along the Bolgoda Canal of the Bellanwila-Attidiya Marsh, Western Sri Lanka.	NA	NA	Sites are not in the bioclimatic region
ACTU_WOS_T_198	WOS	10.1093/beheco/ary020	2018	Ditmer, MA; Rettler, SJ; Fieberg, JR; Iaizzo, PA; Laske, TG; Noyce, KV; Garshelis, DL	American black bears perceive the risks of crossing roads	NA	NA	Sites are not in the bioclimatic region
ACTU_WOS_F_285	WOS	10.1371/journal.pone.0192538	2018	Dittbrenner, BJ; Pollock, MM; Schilling, JW; Olden, JD; Lawler, JJ; Torgersen, CE	Modeling intrinsic potential for beaver (Castor canadensis) habitat to inform restoration and climate change adaptation	NA	NA	The study type is inappropriate (no data, simulation, recommendation)
ACTU_WOS_T_3289	WOS	10.1016/j.jnc.2017.01.001	2017	Dixon, A; Rahman, ML; Galtbalt, B; Gunga, A; Sugarsaikhan, B; Batbayar, N	Avian electrocution rates associated with density of active small mammal holes and power-pole mitigation: Implications for the conservation of Threatened raptors in Mongolia	NA	NA	Sites are not in the bioclimatic region
ZR_2275	ZR	10.2307/1368143	1989	Dixon, K. L.	Contact zones of avian congeners on the southern Great Plains.	NA	NA	The document is a review
WOS_7749	WOS	NA	2012	Dobbs, Emily K.; Brown, Maria G.; Snodgrass, Joel W.; Ownby, David R.	SALT TOXICITY TO TREEFROGS (HYLA CHRYSOSCELIS) DEPENDS ON DEPTH	NA	Herpetologica	The study type is inappropriate (no data, simulation, recommendation)
WOS_7750	WOS	NA	1998	Dobkin, D. S.; Rich, A. C.	Comparison of line-transect spot-map, and point-count surveys for birds in Riparian habitats of the Great Basin	NA	Journal of Field Ornithology	The document meets exclusion criteria for waterways
WOS_7751	WOS	10.1046/j.1523-1739.1998.96349.x	1998	Dobkin, D. S.; Rich, A. C.; Pyle, W. H.	Habitat and avifaunal recovery from livestock grazing in a riparian meadow system of the northwestern Great Basin	NA	Conservation Biology	The document meets exclusion criteria for waterways
WOS_7752	WOS	10.2307/1369178	1995	DOBKIN, DS; RICH, AC; PRETARE, JA; PYLE, WH	NEST-SITE RELATIONSHIPS AMONG CAVITY-NESTING BIRDS OF RIPARIAN AND SNOWPOCKET ASPEN WOODLANDS IN THE NORTHWESTERN GREAT-BASIN	NA	Condor	The document meets previous screening exclusion criteria (Exposure)
WOS_7761	WOS	10.1002/(SICI)1099-0755(199901/02)9:1<133::AID-AQC318>3.3.CO;2-#	1999	Dobson, M.; Cariss, H.	Restoration of afforested upland streams - what are we trying to achieve?	NA	Aquatic Conservation-Marine and Freshwater Ecosystems	The document is a review
WOS_7780	WOS	10.3996/062013-JFWM-040	2013	Dodge, William B.; Kashian, Daniel M.	Recent Distribution of Coyotes Across an Urban Landscape in Southeastern Michigan	NA	Journal of Fish and Wildlife Management	Sites are not in the bioclimatic region
ACTU_WOS_F_2003	WOS	10.1002/ece3.2400	2016	Dodson, JC; Moy, NJ; Bulluck, LP	Prothonotary warbler nestling growth and condition in response to variation in aquatic and terrestrial prey availability	NA	NA	The comparator is inappropriate
ZR_12117	ZR	NA	1991	Dombrowski, A.; Fronczak, J.; Kowalski, M.; Lippoman, T.	Population density and habitat preferences of owls Strigiformes on agricultural areas of Mazowsze Lowlands (Central Poland).	NA	NA	Pdf cannot be obtained
ZR_2316	ZR	NA	2015	Domenech, Robert; Bedrosian, Bryan E.; Crandall, Ross H.; Slabe, Vincent A.	SPACE USE AND HABITAT SELECTION BY ADULT MIGRANT GOLDEN EAGLES WINTERING	NA	NA	Sites are not in the bioclimatic region
WOS_7823	WOS	10.7550/rmb.43849	2014	Dominguez-Lopez, Moises Elias; Ortega-Alvarez, Ruben	The importance of riparian habitats for avian communities in a highly human-modified Neotropical landscape	NA	Revista Mexicana De Biodiversidad	Sites are not in the bioclimatic region
WOS_7835	WOS	10.1128/JVI.01255-10	2010	Donaldson, Eric F.; Haskew, Aimee N.; Gates, J. Edward; Huynh, Jeremy; Moore, Clea J.; Frieman, Matthew B.	Metagenomic Analysis of the Viromes of Three North American Bat Species: Viral Diversity among Different Bat Species That Share a Common Habitat	NA	Journal of Virology	The document meets previous screening exclusion criteria (Exposure)
ZR_2321	ZR	10.1007/s11252-006-0015-2	2007	Donaldson, Michael R.; Henein, Kringen M.; Runtz, Michael W.	Assessing the effect of developed habitat on waterbird behaviour in an urban riparian system in Ottawa, Canada.	NA	NA	Sites are not in the bioclimatic region
WOS_7839	WOS	10.1590/1519-6984.05013	2014	Donatelli, R. J.; Posso, S. R.; Toledo, M. C. B.	Distribution, composition and seasonality of aquatic birds in the Nhecolandia sub-region of South Pantanal, Brazil	NA	Brazilian Journal of Biology	Sites are not in the bioclimatic region
ACTU_WOS_F_537	WOS	NA	2017	Donatelli, RJ; Eaton, DP; Sementili-Cardoso, G; Vianna, RM; Gerotti, RW; Rodrigues, FG; Martins, RM	Temporal and spatial variation of richness and abundance of the community of birds in the Pantanal wetlands of Nhecolandia (Mato Grosso do Sul, Brazil)	NA	NA	Sites are not in the bioclimatic region
WOS_7844	WOS	NA	2001	Doncaster, C. P.; Rondinini, C.; Johnson, P. C. D.	Field test for environmental correlates of dispersal in hedgehogs Erinaceus europaeus	NA	Journal of Animal Ecology	Results are in an unexploitable format
WOS_7887	WOS	NA	2002	Doody, J. S.; Young, J. E.; Georges, A.	Sex differences in activity and movements in the pig-nosed turtle, Carettochelys insculpta, in the wet-dry tropics of Australia	NA	Copeia	Sites are not in the bioclimatic region
WOS_7888	WOS	10.1007/s10530-012-0308-8	2013	Doody, J. Sean; Castellano, Christina M.; Rhind, David; Green, Brian	Indirect facilitation of a native mesopredator by an invasive species: are cane toads re-shaping tropical riparian communities?	NA	Biological Invasions	Sites are not in the bioclimatic region
WOS_7889	WOS	NA	2014	Doody, J. Sean; Harlow, Peter; Douglass, Donna; Thiem, Jason D.; Broadhurst, Ben; Trembath, Dane; Olsen, Jerry; Fuentes, Esteban; Rose, Tony	PATTERNS OF PREDATION AND ANTIPREDATOR BEHAVIOR IN THE AUSTRALIAN WATER DRAGON, PHYSIGNATHUS LESUEURII	NA	Herpetological Conservation and Biology	The document is a review
WOS_7890	WOS	10.1111/j.1439-0310.2006.01298.x	2007	Doody, J. Sean; Sims, Rachel A.; Letnic, Mike	Environmental manipulation to avoid a unique predator: Drinking hole excavation in the agile wallaby, Macropus agilis	NA	Ethology	Sites are not in the bioclimatic region
ACTU_WOS_T_1791	WOS	10.1650/CONDOR-16-234.1	2017	Dorak, BE; Ward, MP; Eichholz, MW; Washburn, BE; Lyons, TP; Hagy, HM	Survival and habitat selection of Canada Geese during autumn and winter in metropolitan Chicago, USA	NA	NA	Sites are not in the bioclimatic region
WOS_7903	WOS	10.1073/pnas.1115226109	2012	Dorcas, Michael E.; Willson, John D.; Reed, Robert N.; Snow, Ray W.; Rochford, Michael R.; Miller, Melissa A.; Meshaka, Walter E.; Andreadis, Paul T.; Mazzotti, Frank J.; Romagosa, Christina M.; Hart, Kristen M.	Severe mammal declines coincide with proliferation of invasive Burmese pythons in Everglades National Park	NA	Proceedings of the National Academy of Sciences of the United States of America	Sites are not in the bioclimatic region
WOS_7904	WOS	10.1016/j.envpol.2010.08.004	2010	Dorchin, A.; Shanas, U.	Assessment of pollution in road runoff using a Bufo viridis biological assay	NA	Environmental Pollution	The study type is inappropriate (no data, simulation, recommendation)
ACTU_WOS_F_3544	WOS	10.2994/SAJH-D-14-00029.1	2015	Doria, TAF; Klein, W; de Abreu, RO; Santos, DC; Cordeiro, MC; Silva, LM; Bonfim, VMG; Napoli, MF	Environmental Variables Influence the Composition of Frog Communities in Riparian and Semi-Deciduous Forests of the Brazilian Cerrado	NA	NA	Sites are not in the bioclimatic region
ZR_2338	ZR	NA	2007	dos Anjos, Luiz; Volpato, Graziele H.; Lopes, Edson V.; Serafini, Patricia P.; Poletto, Fabiola; Aleixo, Alexandre	The importance of riparian forest for the maintenance of bird species richness in an Atlantic Forest remnant, southern Brazil.	NA	NA	Sampling points are not on verges (exposure)
ACTU_WOS_F_709	WOS	10.1007/s10764-017-9991-8	2017	Dosen, J; Fortin, MJ; Raboy, BE	Restoration Strategies to Improve Connectivity for Golden-Headed Lion Tamarins (Leontopithecus chrysomelas) in the Bahian Atlantic Forest, Brazil	NA	NA	Sites are not in the bioclimatic region
WOS_7929	WOS	NA	2002	Doucet, G. J.; Thompson, E. R.	Deer browse monitoring in a reconstructed 120 kV powerline right-of-way after an ice storm	NA	NA	Pdf cannot be obtained (and sites are not in the temperate bioclimatic region)
EM_168	GREY_LITT_email_request	NA	2014	Doucet, Jean	Environmental Concerns in Rights-of-Way Management, 10th International Symposium	NA	NA	Sites are not in the bioclimatic region
WOS_7935	WOS	NA	1992	DOUGLAS, DC; RATTI, JT; BLACK, RA; ALLDREDGE, JR	AVIAN HABITAT ASSOCIATIONS IN RIPARIAN ZONES OF IDAHO CENTENNIAL MOUNTAINS	NA	Wilson Bulletin	Sites are not in the bioclimatic region
WOS_7951	WOS	10.1080/00219266.1997.9655565	1997	Dove, J.	Investigating roadside verges	NA	Journal of Biological Education	Pdf cannot be obtained
WOS_7963	WOS	10.1046/j.1523-1739.1997.96094.x	1997	Downes, S. J.; Handasyde, K. A.; Elgar, M. A.	The use of corridors by Mammals in fragmented Australian eucalypt forests	NA	Conservation Biology	The comparator is inappropriate
WOS_7964	WOS	10.1016/S0006-3207(97)00031-1	1997	Downes, S. J.; Handasyde, K. A.; Elgar, M. A.	Variation in the use of corridors by introduced and native rodents in south-eastern Australia	NA	Biological Conservation	The comparator is inappropriate
ACTU_WOS_T_10232	WOS	10.1007/s11284-015-1264-4	2015	Downing, RJ; Rytwinski, T; Fahrig, L	Positive effects of roads on small mammals: a test of the predation release hypothesis	NA	NA	Sites are not in the bioclimatic region
ZR_2367	ZR	NA	2004	Drescher, Christian	Evaluation of habitats on the banks of the river Etsch according to hunting activity of bats.	NA	NA	Language is not English or French
WOS_8021	WOS	10.1890/02-5248	2004	Driscoll, D. A.	Extinction and outbreaks accompany fragmentation of a reptile community	NA	Ecological Applications	Sites are not in the bioclimatic region
ZR_2374	ZR	NA	2007	Dronneau, Christian	Breeding birds of a Rhine riverine forest (part one).	NA	NA	The comparator is inappropriate
WOS_8032	WOS	NA	1997	Drovetski, Serguei V.	Spring social organisation, habitat use, diet, and body mass dynamics of hazel grouse Bonasa bonasia in northeastern Asia	NA	Wildlife Biology	Sites are not in the bioclimatic region
WOS_8089	WOS	NA	2012	Dudaniec, Rachael Y.; Richardson, John S.	HABITAT ASSOCIATIONS OF THE COASTAL GIANT SALAMANDER (DICAMPTODON TENEBROSUS) AT ITS NORTHERN RANGE LIMIT	NA	Herpetological Conservation and Biology	The document meets exclusion criteria for waterways
WOS_8095	WOS	10.1007/BF00006146	1992	DUDGEON, D.	ENDANGERED ECOSYSTEMS - A REVIEW OF THE CONSERVATION STATUS OF TROPICAL ASIAN RIVERS	NA	Hydrobiologia	The document is a review
WOS_8094	WOS	10.1146/annurev.ecolsys.31.1.239	2000	Dudgeon, D.	The ecology of tropical Asian rivers and streams in relation to biodiversity conservation	NA	Annual Review of Ecology and Systematics	The document is a review
WOS_8107	WOS	10.1007/s13157-014-0603-5	2015	Dudley, Maura Patricia; Ho, Mengchi; Richardson, Curtis J.	Riparian Habitat Dissimilarities in Restored and Reference Streams are Associated with Differences in Turtle Communities in the Southeastern Piedmont	NA	Wetlands	The document meets exclusion criteria for waterways
WOS_8179	WOS	10.2111/REM-D-09-00176.1	2010	Duniway, Michael C.; Herrick, Jeffrey E.; Pyke, David A.; Toledo, David P.	Assessing Transportation Infrastructure Impacts on Rangelands: Test of a Standard Rangeland Assessment Protocol	NA	Rangeland Ecology & Management	Sites are not in the bioclimatic region
WOS_8186	WOS	NA	1992	DUNN, PO; HANNON, SJ	EFFECTS OF FOOD ABUNDANCE AND MALE PARENTAL CARE ON REPRODUCTIVE SUCCESS AND MONOGAMY IN TREE SWALLOWS	NA	Auk	Sites are not in the bioclimatic region
ZR_12223	ZR	NA	2008	Dunne, Bridget M.; Quinn, Michael S.	Effectiveness of above-ground pipeline mitigation for moose (Alces alces) and other large mammals.	NA	NA	Sites are not in the bioclimatic region
WOS_8213	WOS	10.1016/S0378-1127(99)00051-1	1999	Dupuis, L.; Steventon, D.	Riparian management and the tailed frog in northern coastal forests	NA	Forest Ecology and Management	Sites are not in the bioclimatic region
WOS_8221	WOS	10.1111/j.1469-7998.1998.tb00075.x	1998	Durbin, L. S.	Habitat selection by five otters Lutra lutra in rivers of northern Scotland	NA	Journal of Zoology	The comparator is inappropriate
ZR_2425	ZR	NA	1996	Durbin, Leon S.	Individual differences in spatial utilization of a river-system by otters Lutra lutra.	NA	NA	The comparator is inappropriate
WOS_8230	WOS	10.1525/cond.2008.8493	2008	Durst, Scott L.; Theimer, Tad C.; Paxton, Eben H.; Sogge, Mark K.	AGE, HABITAT, AND YEARLY VARIATION IN THE DIET OF A GENERALIST INSECTIVORE, THE SOUTHWESTERN WILLOW FLYCATCHER	NA	Condor	Sites are not in the bioclimatic region
ZR_2434	ZR	NA	1989	Dusek, G. L.; Mackie, R. J.; Herriges, J. D.; Compton, B. B.	Population ecology of white-tailed deer along the lower Yellowstone River.	NA	NA	Sites are not in the bioclimatic region
ZR_2435	ZR	NA	1988	Dusek, G. L.; Wood, A. K.; Mackie, R. J.	Habitat use by white-tailed deer in prairie-agricultural habitat in Montana.	NA	NA	Pdf cannot be obtained
WOS_8233	WOS	10.2193/2006-499	2007	Dussault, Christian; Ouellet, Jean-Pierre; Laurian, Catherine; Courtois, Rehaume; Poulin, Marius; Breton, Laurier	Moose movement rates along highways and crossing probability models	NA	Journal of Wildlife Management	Sites are not in the bioclimatic region
ZR_2441	ZR	NA	2013	Dvorak, Jan	DIET PREFERENCE OF EURASIAN BEAVER (CASTOR FIBER L., 1758) IN THE ENVIRONMENT OF ODERSKE VRCHY AND ITS INFLUENCE ON THE TREE SPECIES COMPOSITION OF RIVER BANK STANDS.	NA	NA	The document meets previous screening exclusion criteria (Outcome)
ZR_12247	ZR	NA	2014	Dwyer, James F.; Doloughan, Kerrin W.	Testing systems of avian perch deterrents on electric power distribution poles in sage-brush habitat.	NA	NA	The comparator is inappropriate
ZR_12249	ZR	NA	1992	Dwyer, N. C.; Tanner, G. W.	Nesting success in Florida sandhill cranes.	NA	NA	Sampling points are not on verges (exposure)
ACTU_ZR_F_384	ZR	NA	2017	Dybala, Kristen E.; Clipperton, Neil; Gardali, Thomas; Golet, Gregory H.; Kelsey, Rodd; Lorenzato, Stefan; Melcer, Ron, Jr; Seavy, Nathaniel E.; Silveira, Joseph G.; Yarris, Gregory S.	Population and Habitat Objectives for Avian Conservation in California's Central Valley Riparian Ecosystems.	NA	NA	The comparator is inappropriate
ZR_2443	ZR	NA	2014	Dybala, Kristen E.; Seavy, Nathaniel E.; Dettling, Mark D.; Gilbert, Michelle; Melcer, Ron; Gardali, Thomas	Does Restored Riparian Habitat Create Ecological Traps for Riparian Birds Through Increased Brown-Headed Cowbird Nest Parasitism?	NA	NA	Sampling points are not on verges (exposure)
WOS_8275	WOS	10.1139/Z02-060	2002	Dyer, S. J.; O'Neill, J. P.; Wasel, S. M.; Boutin, S.	Quantifying barrier effects of roads and seismic lines on movements of female woodland caribou in northeastern Alberta	NA	Canadian Journal of Zoology-Revue Canadienne De Zoologie	Sites are not in the bioclimatic region
WOS_8278	WOS	10.1676/0043-5643(2001)113[0308:HRAHUO]2.0.CO;2	2001	Dykstra, C. R.; Hays, J. L.; Daniel, F. B.; Simon, M. M.	Home range and habitat use of suburban Red-shouldered Hawks in southwestern Ohio	NA	Wilson Bulletin	Results are in an unexploitable format
ZR_2446	ZR	10.1650/0010-5422(2001)103[0652:CORSHA]2.0.CO;2	2001	Dykstra, Cheryl R.; Daniel, F. Bernard; Hays, Jeffrey L.; Simon, Melinda M.	Correlation of Red-shouldered Hawk abundance and macrohabitat characteristics in southern Ohio.	NA	NA	Results are in an unexploitable format
ACTU_WOS_T_2816	WOS	10.1016/j.flora.2017.04.004	2017	Dylewski, L; Kurek, P; Wiatrowska, B; Jerzak, L; Tryjanowski, P	Man-made perching sites - electricity pylons accelerate fleshy-fruited plants succession in farmlands	NA	NA	The comparator is inappropriate
WOS_8290	WOS	NA	1997	Eakle, W. L.	Observations of raptors in the Republic of Vanuatu	NA	Journal of Raptor Research	Sites are not in the bioclimatic region
WOS_8292	WOS	NA	1996	Eakle, W. L.; Smith, E. L.; Hoffman, S. W.; Stahlecker, D. W.; Duncan, R. B.	Results of a raptor survey in southwestern New Mexico	NA	Journal of Raptor Research	Sites are not in the bioclimatic region
ZR_12261	ZR	NA	2008	Eakle, Wade L.	Relative abundance of Australasian harriers (Circus approximans) in New Zealand.	NA	NA	The comparator is inappropriate
WOS_8300	WOS	10.1111/j.1523-1739.2012.01903.x	2012	Earnst, Susan L.; Dobkin, David S.; Ballard, Jennifer A.	Changes in Avian and Plant Communities of Aspen Woodlands over 12 Years after Livestock Removal in the Northwestern Great Basin	NA	Conservation Biology	The document meets exclusion criteria for waterways
ZR_2455	ZR	10.2307/5332	1992	Eason, P.	Optimization of territory shape in heterogeneous habitats: a field study of the red-capped cardinal (Paroaria gularis).	NA	NA	Sites are not in the bioclimatic region
ZR_2457	ZR	10.2307/3809206	1989	Eberhardt, L. E.; Anthony, R. G.; Rickard, W. H.	Movement and habitat use by Great Basin Canada goose broods.	NA	NA	Sites are not in the bioclimatic region
WOS_8347	WOS	NA	2011	Edgardo Arevalo, J.; Newhard, Kimberly	Traffic noise affects forest bird species in a protected tropical forest	NA	Revista De Biologia Tropical	Sites are not in the bioclimatic region
ZR_12277	ZR	NA	2011	Edridge, Bonnie; Wynn, Jules	Use of badger tunnels by mammals on Highways Agency schemes in England.	NA	NA	The document meets previous screening exclusion criteria (Exposure)
ACTU_WOS_T_7148	WOS	10.1007/s00300-015-1825-6	2016	Eftestol, S; Tsegaye, D; Flydal, K; Colman, JE	From high voltage (300 kV) to higher voltage (420 kV) power lines: reindeer avoid construction activities	NA	NA	Sites are not in the bioclimatic region
WOS_8390	WOS	10.1034/j.1600-048X.2000.310109.x	2000	Eggers, S.	Compensatory frugivory in migratory Sylvia warblers: geographical responses to season length	NA	Journal of Avian Biology	The document meets previous screening exclusion criteria (Exposure)
WOS_8397	WOS	10.1134/S199542550903014X	2009	Egorov, N. N.; Isaev, A. P.; Larionov, A. G.	Summer bird population in the central part of the Prilenskoe plateau	NA	Contemporary Problems of Ecology	Sites are not in the bioclimatic region
WOS_8418	WOS	10.1007/s10980-007-9174-7	2008	Eigenbrod, Felix; Hecnar, Stephen J.; Fahrig, Lenore	Accessible habitat: an improved measure of the effects of habitat loss and roads on wildlife populations	NA	Landscape Ecology	Sites are not in the bioclimatic region
WOS_8429	WOS	10.2980/15-2-3025	2008	Einarsen, Goril; Hausner, Vera H.; Yoccoz, Nigel G.; Ims, Rolf A.	Predation on artificial ground nests in birch forests fragmented by spruce plantations	NA	Ecoscience	Sites are not in the bioclimatic region
WOS_8455	WOS	10.1111/j.1752-1688.2007.00102.x	2007	Ekness, Paul; Randhir, Timothy	Effects of riparian areas, stream order, and land use disturbance on watershed-scale habitat potential: An ecohydrologic approach to policy	NA	Journal of the American Water Resources Association	Sites are not in the bioclimatic region
ZR_2492	ZR	NA	2003	Elgmork, Kare	Waterbird ecology in a river meander in southern Norway.	NA	NA	Pdf cannot be obtained
WOS_8534	WOS	10.2193/0091-7648(2006)34[485:SMRTSA]2.0.CO;2	2006	Elliott, Anthony G.; Root, Brian G.	Small mammal responses to silvicultural and precipitation-related disturbance in northeastern Missouri riparian forests	NA	Wildlife Society Bulletin	Sites are not in the bioclimatic region
ZR_12325	ZR	10.3356/JRR-08-110.1	2009	Ellis et al.	Unusual raptor nests around the world.	NA	NA	The document is a review
WOS_8556	WOS	10.1111/jofo.12075	2014	Ellis, Kristen S.; Larsen, Randy T.; Knight, Robert N.; Cavitt, John F.	Occupancy and detectability of Snowy Plovers in western Utah: an application to a low density population	NA	Journal of Field Ornithology	Sites are not in the bioclimatic region
WOS_8558	WOS	NA	1997	Ellis, L. M.; Crawford, C. S.; Molles, M. C.	Rodent communities in native and exotic riparian vegetation in the middle Rio Grande Valley of central New Mexico	NA	Southwestern Naturalist	Sites are not in the bioclimatic region
WOS_8563	WOS	10.1016/S0140-1963(05)80008-4	1995	ELLIS, LM	BIRD USE OF SALTCEDAR AND COTTONWOOD VEGETATION IN THE MIDDLE RIO-GRANDE VALLEY OF NEW-MEXICO, USA	NA	Journal of Arid Environments	Sites are not in the bioclimatic region
WOS_8569	WOS	10.2307/1383105	1998	Ellison, L. E.; van Riper, C.	A comparison of small-mammal communities in a desert riparian floodplain	NA	Journal of Mammalogy	The document meets exclusion criteria for waterways
ZR_12336	ZR	10.1071/WR96066	1997	Emison, W. B.; White, C. M.; Hurley, V. G.; Brimm, D. J.	Factors influencing the breeding distribution of the peregrine falcon in Victoria, Australia.	NA	NA	The document meets previous screening exclusion criteria (Exposure)
ACTU_WOS_T_9925	WOS	10.1016/j.jnc.2015.06.003	2015	Encarnacao, JA; Becker, NI	Stealthy at the roadside: Connecting role of roadside hedges and copse for silvicolous, small mammal populations	NA	NA	The comparator is inappropriate
WOS_8630	WOS	10.1656/1528-7092(2005)004[0657:HDSOSR]2.0.CO;2	2005	Enge, K. M.	Herpetofaunal drift-fence surveys of steephead ravines in the Florida panhandle	NA	Southeastern Naturalist	The document meets exclusion criteria for waterways
ZR_12341	ZR	NA	1996	Enge, Kevin M.; Cobb, David T.; Sprandel, Gary L.; Francis, Donald L.	Wildlife captures in a pipeline trench in Gadsden County, Florida.	NA	NA	The document does not dealt with our 6 specific questions
WOS_8635	WOS	10.1006/eesa.2000.2027	2001	Engelhart, A.; Behnisch, P.; Hagenmaier, H.; Apfelbach, R.	PCBs and their putative effects on polecat (Mustela putorius) populations in Central Europe	NA	Ecotoxicology and Environmental Safety	The document meets previous screening exclusion criteria (Outcome)
ZR_2557	ZR	NA	1994	Erhart, Fokko C.	Breeding of the common sandpiper Actitis hypoleucos in the Netherlands.	NA	NA	Pdf cannot be obtained
ACTU_WOS_T_2356	WOS	10.1371/journal.pone.0182140	2017	Erinjery, JJ; Kumar, S; Kumara, HN; Mohan, K; Dhananjaya, T; Sundararaj, P; Kent, R; Singh, M	Losing its ground: A case study of fast declining populations of a 'least-concern' species, the bonnet macaque (Macaca radiata)	NA	NA	Sites are not in the bioclimatic region
ZR_2569	ZR	NA	2005	Ernst, Stephan	Distribution of the grey-headed woodpecker in the Vogtland region of Saxony.	NA	NA	Pdf cannot be obtained
ZR_2570	ZR	NA	1984	Erome, G.; Broyer, J.	Analyse de relations castor - vegetation.	NA	NA	The comparator is inappropriate
WOS_8726	WOS	10.1371/journal.pone.0036462	2012	Eros, Tibor; Gustafsson, Par; Greenberg, Larry A.; Bergman, Eva	Forest-Stream Linkages: Effects of Terrestrial Invertebrate Input and Light on Diet and Growth of Brown Trout (Salmo trutta) in a Boreal Forest Stream	NA	Plos One	Sites are not in the bioclimatic region
WOS_8745	WOS	10.2193/2009-288	2010	Erxleben, Devin R.; Butler, Matthew J.; Ballard, Warren B.; Wallace, Mark C.; Hardin, Jason B.; Demaso, Stephen J.	Encounter Rates From Road-Based Surveys of Rio Grande Wild Turkeys in Texas	NA	Journal of Wildlife Management	Results are in an unexploitable format
ACTU_ZR_F_170	ZR	NA	2017	Escoda, Lidia; Gonzalez-Esteban, Jorge; Gomez, Asuncion; Castresana, Jose	Using relatedness networks to infer contemporary dispersal: Application to the endangered mammal Galemys pyrenaicus.	NA	NA	The document meets previous screening exclusion criteria (Outcome)
WOS_8762	WOS	10.1111/j.1523-1739.2012.01842.x	2012	Eskew, Evan A.; Price, Steven J.; Dorcas, Michael E.	Effects of River-Flow Regulation on Anuran Occupancy and Abundance in Riparian Zones	NA	Conservation Biology	Sampling points are not on verges (exposure)
WOS_8765	WOS	10.1016/j.sajb.2007.02.158	2007	Esler, K. J.; Milton, S. J.	Managing roads, rivers and power line servitudes as biodiversity corridors through the landscape	NA	South African Journal of Botany	The type of document is not appropriate
WOS_8793	WOS	10.1644/09-MAMM-A-032R.1	2010	Estes-Zumpe, Wendy A.; Rachlow, Janet L.; Waits, Lisette P.; Warheit, Kenneth I.	Dispersal, gene flow, and population genetic structure in the pygmy rabbit (Brachylagus idahoensis)	NA	Journal of Mammalogy	Sites are not in the bioclimatic region
WOS_8798	WOS	10.1023/A:1008935016046	2000	Estrada, A.; Cammarano, P.; Coates-Estrada, R.	Bird species richness in vegetation fences and in strips of residual rain forest vegetation at Los Tuxtlas, Mexico	NA	Biodiversity and Conservation	Sites are not in the bioclimatic region
WOS_8799	WOS	10.1034/j.1600-0587.2001.240111.x	2001	Estrada, A.; Coates-Estrada, R.	Bat species richness in live fences and in corridors of residual rain forest vegetation at Los Tuxtlas, Mexico	NA	Ecography	Sites are not in the bioclimatic region
WOS_8802	WOS	10.1007/s00267-003-0045-y	2003	Etienne, R. S.; Vos, C. C.; Jansen, M. J. W.	Ecological impact assessment in data-poor systems: A case study on metapopulation persistence	NA	Environmental Management	The study type is inappropriate (no data, simulation, recommendation)
WOS_8814	WOS	10.1644/10-MAMM-A-289.1	2011	Eubanks, Bryan W.; Hellgren, Eric C.; Nawrot, Jack R.; Bluett, Robert D.	Habitat associations of the marsh rice rat (Oryzomys palustris) in freshwater wetlands of southern Illinois	NA	Journal of Mammalogy	The comparator is inappropriate
WOS_8819	WOS	10.1111/j.1749-4877.2009.00147.x	2009	Evangelista, Paul; Engeman, Richard; Tallents, Lucy	Testing a passive tracking index for monitoring the endangered Ethiopian wolf	NA	Integrative Zoology	The document meets previous screening exclusion criteria (Exposure)
ACTU_WOS_F_670	WOS	10.1371/journal.pone.0184804	2017	Evans, LJ; Davies, AB; Goossens, B; Asner, GP	Riparian vegetation structure and the hunting behavior of adult estuarine crocodiles	NA	NA	Sites are not in the bioclimatic region
ACTU_ZR_F_918	ZR	NA	2016	Evans, Meaghan N.; Vickers, Stephen H.; Abu-Bakar, Mohd Soffian; Goossens, Benoit	Small Carnivores of the Lower Kinabatangan Wildlife Sanctuary, Sabah, Borneo, including a new locality for the Otter Civet Cynogale bennettii.	NA	NA	Sites are not in the bioclimatic region
WOS_8838	WOS	10.2307/4003985	2004	Evans, S. G.; Pelster, A. J.; Leininger, W. C.; Trlica, M. J.	Seasonal diet selection of cattle grazing a montane riparian community	NA	Journal of Range Management	Sites are not in the bioclimatic region
WOS_8851	WOS	10.1016/S0378-1127(98)00264-3	1998	Everson, D. A.; Boucher, D. H.	Tree species-richness and topographic complexity along the riparian edge of the Potomac River	NA	Forest Ecology and Management	The document does not dealt with our 6 specific questions
ZR_12417	ZR	NA	2012	Fackelmann, Christian	Losses of birds and mammals on a section of the Highway 8 (Bavaria) in course of season and route.	NA	NA	Language is not English or French
WOS_8908	WOS	NA	2009	Fahrig, Lenore; Rytwinski, Trina	Effects of Roads on Animal Abundance: an Empirical Review and Synthesis	NA	Ecology and Society	The document is a review
WOS_8924	WOS	NA	2003	Falck, M. J.; Wilson, K. R.; Andersen, D. C.	Small mammals within riparian habitats of a regulated and unregulated aridland river	NA	Western North American Naturalist	Sites are not in the bioclimatic region
WOS_8988	WOS	NA	1998	Fargallo, J. A.; Blanco G.; Soto-Largo E.	Forest management effects on nesting habitat selected by Eurasian Black Vultures (Aegypius monachus) in central Spain	NA	Journal of Raptor Research	The document meets previous screening exclusion criteria (Exposure)
WOS_9000	WOS	10.1046/j.1523-1739.1994.08041098.x	1994	FARLEY, GH; ELLIS, LM; STUART, JN; SCOTT, NJ	AVIAN SPECIES RICHNESS IN DIFFERENT-AGED STANDS OF RIPARIAN FOREST ALONG THE MIDDLE RIO-GRANDE, NEW-MEXICO	NA	Conservation Biology	The document meets previous screening exclusion criteria (Exposure)
WOS_9004	WOS	NA	2003	Farmer, C.; Rothstein, S. I.; Holmgren, M. A.	The distribution and abundance of Southwestern Willow Flycatchers on the lower Santa Ynez River, California	NA	NA	The comparator is inappropriate
WOS_9020	WOS	10.1111/cobi.12062	2013	Faruk, Aisyah; Belabut, Daicus; Ahmad, Norhayati; Knell, Robert J.; Garner, Trenton W. J.	Effects of Oil-Palm Plantations on Diversity of Tropical Anurans	NA	Conservation Biology	Sites are not in the bioclimatic region
WOS_9024	WOS	10.1675/1524-4695(2004)027[0177:POWUBB]2.0.CO;2	2004	Fast, P. L. F.; Clark, R. G.; Brook, R. W.; Hines, J. E.	Patterns of wetland use by brood-rearing lesser scaup in northern boreal forest of Canada	NA	Waterbirds	Sites are not in the bioclimatic region
ZR_2659	ZR	NA	1984	Fedyk, S.; Gebczynska, Z.; Pucek, M.; Raczynski, J.; Sikorski, M. D.	Winter penetration by mammals of different habitats in the Biebrza Valley.	NA	NA	Sites are not in the bioclimatic region
ACTU_WOS_F_3850	WOS	10.1007/s10531-014-0850-z	2015	Feit, B; Letnic, M	Species level traits determine positive and negative population impacts of invasive cane toads on native squamates	NA	NA	The document is a review
WOS_9105	WOS	10.1111/fwb.12077	2013	Feld, Christian K.	Response of three lotic assemblages to riparian and catchment-scale land use: implications for designing catchment monitoring programmes	NA	Freshwater Biology	The document meets previous screening exclusion criteria (Outcome)
WOS_9106	WOS	NA	2011	Feld, Christian K.; Birk, Sebastian; Bradley, David C.; Hering, Daniel; Kail, Jochem; Marzin, Anahita; Melcher, Andreas; Nemitz, Dirk; Pedersen, Morten L.; Pletterbauer, Florian; Pont, Didier; Verdonschot, Piet F. M.; Friberg, Nikolai	From Natural to Degraded Rivers and Back Again: A Test of Restoration Ecology Theory and Practice	NA	Advances in Ecological Research, Vol 44	The document is a review
WOS_9125	WOS	10.1644/1545-1542(2002)083<0167:HUAFBO>2.0.CO;2	2002	Fellers, G. M.; Pierson, E. D.	Habitat use and foraging behavior of Townsend's big-eared bat (Corynorhinus townsendii) in coastal California	NA	Journal of Mammalogy	The document meets previous screening exclusion criteria (Exposure)
WOS_9126	WOS	10.2193/0022-541X(2004)068[0503:FEOTPR]2.0.CO;2	2004	Fellers, G. M.; Pratt, D.; Griffin, J. L.	Fire effects on the Point Reyes mountain beaver at Point Reyes National Seashore, California	NA	Journal of Wildlife Management	The document meets exclusion criteria for waterways
WOS_9127	WOS	NA	2007	Fellers, Gary M.; Osbourn, Michael S.	Abundance and impacts of fallow deer leks at Point Reyes National Seashore	NA	California Fish and Game	The document meets exclusion criteria for waterways
WOS_9170	WOS	10.1007/s11252-013-0328-x	2014	Ferenc, Michal; Sedlacek, Ondrej; Fuchs, Roman	How to improve urban greenspace for woodland birds: site and local-scale determinants of bird species richness	NA	Urban Ecosystems	The document meets exclusion criteria for waterways
ZR_12483	ZR	NA	1989	Ferguson, J. W. H.	Preferred habitat of white-browed sparrow-weavers Plocepasser mahali.	NA	NA	Sites are not in the bioclimatic region
WOS_9185	WOS	10.1300/J064v30n02_13	2007	Fernald, Alexander G.; Baker, Terrell T.; Guldan, Steven J.	Hydrologic, riparian, and agroecosystem functions of traditional Acequia irrigation systems	NA	Journal of Sustainable Agriculture	Sites are not in the bioclimatic region
WOS_9266	WOS	NA	1991	FERRER, M.; DELARIVA, M.; CASTROVIEJO, J.	ELECTROCUTION OF RAPTORS ON POWER-LINES IN SOUTHWESTERN SPAIN	NA	Journal of Field Ornithology	The document meets previous screening exclusion criteria (Exposure)
WOS_9270	WOS	10.1046/j.1365-2664.1999.00431.x	1999	Ferreras, P.; Macdonald, D. W.	The impact of American mink Mustela vison on water birds in the upper Thames	NA	Journal of Applied Ecology	The comparator is inappropriate
ZR_12500	ZR	10.2307/3800351	1979	Ferris, C. R.	Effects of Interstate 95 on breeding birds in northern Maine.	NA	NA	Sites are not in the bioclimatic region
WOS_9293	WOS	10.1007/s10531-007-9280-5	2008	Ficetola, Gentile Francesco; Furlani, Dario; Colombo, Giorgio; De Bernardi, Fiorenza	Assessing the value of secondary forest for amphibians: Eleutherodactylus frogs in a gradient of forest alteration	NA	Biodiversity and Conservation	Sites are not in the bioclimatic region
WOS_9296	WOS	10.1111/j.1523-1739.2008.01081.x	2009	Ficetola, Gentile Francesco; Padoa-Schioppa, Emilio; De Bernardi, Fiorenza	Influence of Landscape Elements in Riparian Buffers on the Conservation of Semiaquatic Amphibians	NA	Conservation Biology	The document meets exclusion criteria for waterways
WOS_9299	WOS	10.1676/0043-5643(2002)114[0197:RBACIB]2.0.CO;2	2002	Ficken, M. S.; Rusch, K. M.; Taylor, S. J.; Powers, D. R.	Reproductive behavior and communication in blue-throated hummingbirds	NA	Wilson Bulletin	Sites are not in the bioclimatic region
ACTU_WOS_T_4549	WOS	10.1016/j.gecco.2017.01.001	2017	Fiehler, CM; Cypher, BL; Saslaw, LR	Effects of oil and gas development on vertebrate community composition in the southern San Joaquin Valley, California	NA	NA	Sites are not in the bioclimatic region
ZR_2738	ZR	NA	1986	Fielder, P. C.; Starkey, R. G.	Bald eagle perch-sites in eastern Washington.	NA	NA	The comparator is inappropriate
ZR_2739	ZR	NA	1987	Fielder, P. C.; Starkey, R. G.	Bald eagle winter abundance and distribution in eastern Washington.	NA	NA	The comparator is inappropriate
ACTU_WOS_F_2638	WOS	10.1177/194008291600900113	2016	Figueroa-de-Leon, A; Naranjo, EJ; Perales, H; Santos-Moreno, A; Lorenzo, C	Cavity occupancy by lowland paca (Cuniculus paca) in the Lacandon Rainforest, Chiapas, Mexico	NA	NA	Sites are not in the bioclimatic region
WOS_9343	WOS	NA	1999	Finch, D. M.; Kelly, J. F.	Status and migration of the Southwestern Willow Flycatcher in New Mexico	NA	NA	Sites are not in the bioclimatic region
WOS_9344	WOS	NA	1991	FINCH, DM	HOUSE WRENS ADJUST LAYING DATES AND CLUTCH SIZE IN RELATION TO ANNUAL FLOODING	NA	Wilson Bulletin	Sites are not in the bioclimatic region
WOS_9345	WOS	10.1139/z91-139	1991	FINCH, DM	POSITIVE ASSOCIATIONS AMONG RIPARIAN BIRD SPECIES CORRESPOND TO ELEVATIONAL CHANGES IN PLANT-COMMUNITIES	NA	Canadian Journal of Zoology-Revue Canadienne De Zoologie	Sites are not in the bioclimatic region
WOS_9351	WOS	10.1016/S0169-2046(99)00006-7	1999	Finder, R. A.; Roseberry, J. L.; Woolf, A.	Site and landscape conditions at white-tailed deer vehicle collision locations in Illinois	NA	Landscape and Urban Planning	Results are in an unexploitable format
WOS_9387	WOS	10.1023/A:1023091922825	2003	Fiori, S. M.; Zalba, S. M.	Potential impacts of petroleum exploration and exploitation on biodiversity in a Patagonian Nature Reserve, Argentina	NA	Biodiversity and Conservation	The document meets previous screening exclusion criteria (Exposure)
WOS_9404	WOS	NA	2012	Fischer, Richard A.; Valente, Jonathon J.; Guilfoyle, Michael P.; Kaller, Michael D.; Jackson, Sam S.	Bird Community Response to Vegetation Cover and Composition in Riparian Habitats Dominated by Russian Olive (Elaeagnus angustifolia)	NA	Northwest Science	Sites are not in the bioclimatic region
ZR_2773	ZR	NA	1997	Fisher, Andrew M.; Goldney, David C.	Use by birds of riparian vegetation in an extensively fragmented landscape.	NA	NA	Pdf cannot be obtained
ZR_12537	ZR	NA	1981	Fjeldsa, J.	Population size and habitat selection of magpie Pica pica on central Zealand, Denmark.	NA	NA	Language is not English or French
WOS_9463	WOS	10.1046/j.1365-2656.2003.00718.x	2003	Fleishman, E.; Mcdonal, N.; Mac Nally, R.; Murphy, D. D.; Walters, J.; Floyd, T.	Effects of floristics, physiognomy and non-native vegetation on riparian bird communities in a Mojave Desert watershed	NA	Journal of Animal Ecology	Sites are not in the bioclimatic region
WOS_9475	WOS	NA	2002	Fleming, W.; Schmiegelow, F. K. A.	Response of bird communities to pipeline rights-of-way in the boreal forest of Alberta	NA	NA	Pdf cannot be obtained (and sites are not in the temperate bioclimatic region)
WOS_9478	WOS	10.2307/4003586	2001	Flenniken, M.; McEldowney, R. R.; Leininger, W. C.; Frasier, G. W.; Trlica, M. J.	Hydrologic responses of a montane riparian ecosystem following cattle use	NA	Journal of Range Management	Sites are not in the bioclimatic region
ACTU_WOS_F_2372	WOS	10.1111/jofo.12151	2016	Flesch, AD; Sanchez, CG; Amarillas, JV	Abundance and habitat relationships of breeding birds in the Sky Islands and adjacent Sierra Madre Occidental of northwest Mexico	NA	NA	The document meets exclusion criteria for waterways
ACTU_WOS_F_3910	WOS	10.3375/043.035.0209	2015	Flesch, AD; Warshall, P; Jacobs, S	Avian Richness, Status, and Conservation in the Northwestern Neotropics in Sonora, Mexico	NA	NA	Sites are not in the bioclimatic region
WOS_9483	WOS	NA	1999	Fletcher, R. J.; McKinney, S. T.; Bock, C. E.	Effects of recreational trails on wintering diurnal raptors along riparian corridors in a Colorado grassland	NA	Journal of Raptor Research	Sites are not in the bioclimatic region
WOS_9485	WOS	10.1007/s10980-008-9233-8	2008	Fletcher, Robert J.; Hutto, Richard L.	Partitioning the multi-scale effects of human activity on the occurrence of riparian forest birds	NA	Landscape Ecology	Sites are not in the bioclimatic region
WOS_9499	WOS	10.1007/s11252-011-0167-6	2011	Florencia Carballido, Maria; Aristide, Pablo; Busch, Maria; Cittadino, Emilio A.; Gomez Villafane, Isabel E.	Are the closed landfills recovered habitats for small rodents? A case study in a riparian site, Buenos Aires, Argentina	NA	Urban Ecosystems	The comparator is inappropriate
ZR_12560	ZR	NA	2009	Flydal, K.; Korslund, L.; Reimers, E.; Johansen, F.; Colman, J. E.	Effects of power lines on area use and behaviour of semi-domestic reindeer in enclosures.	NA	NA	Sites are not in the bioclimatic region
WOS_9535	WOS	10.1645/12-4.1	2013	Foley, Janet; Branston, Tammy; Woods, Leslie; Clifford, Deana	SEVERE ULCERONECROTIC DERMATITIS ASSOCIATED WITH MITE INFESTATION IN THE CRITICALLY ENDANGERED AMARGOSA VOLE (MICROTUS CALIFORNICUS SCIRPENSIS)	NA	Journal of Parasitology	Sites are not in the bioclimatic region
ZR_12567	ZR	NA	2003	Folkestad, Alv Ottar	Nest site selection and reproduction in the white-tailed sea-eagle in More & Romsdal County, western Norway in relation to human activity.	NA	NA	Pdf cannot be obtained
EM_199	GREY_LITT_email_request	NA	2011	Foltete, Jean-Christophe	GRAPHAB : Graphes paysagers et évaluation de l'impact de la ligne à grande vitesse Rhin-Rhône sur la connectivité spatiale des habitats: conséquences sur les distributions d'espèces	NA	NA	The study type is inappropriate (no data, simulation, recommendation)
ACTU_GREY_LITT_62	GREY_LITT_ITTECOP	NA	2011	Foltête, Jean-Christophe; Afonso, Eve; Clauzel, Céline; Girardet, Xavier; Giraudoux, Patrick; Tournant, Pierline; Vuidel, Gilles	GRAPHAB Graphes paysagers et évaluation de l'impact de la ligne à grande vitesse Rhin-Rhone sur la connectivité spatiale des habitats : conséquences sur les distributions d'espèces	NA	NA	The study type is inappropriate (no data, simulation, recommendation)
ACTU_GREY_LITT_67	GREY_LITT_ITTECOP	NA	2015	Foltête, Jean-Christophe; et al	GRAPHAB 2 Graphes paysagers pour évaluer et atténuer l'impact des grandes infrastructures de transport sur les espèces.	NA	NA	The study type is inappropriate (no data, simulation, recommendation)
WOS_9542	WOS	10.1111/j.1744-7429.2009.00592.x	2010	Fong G, Ansel; Hero, Jean-Marc; Vina, Rolando; Bignotte-Giro, Irelis	Population Ecology of the Riparian Frog Eleutherodactylus cuneatus in Cuba	NA	Biotropica	Sites are not in the bioclimatic region
WOS_9566	WOS	10.2307/2404602	1994	FOPPEN, R.; REIJNEN, R.	THE EFFECTS OF CAR TRAFFIC ON BREEDING BIRD POPULATIONS IN WOODLAND .2. BREEDING DISPERSAL OF MALE WILLOW WARBLERS (PHYLLOSCOPUS-TROCHILUS) IN RELATION TO THE PROXIMITY OF A HIGHWAY	NA	Journal of Applied Ecology	The document meets previous screening exclusion criteria (Outcome)
WOS_9569	WOS	NA	1995	Forbes, B. C.	Tundra disturbance studies.3. Short-term effects of aeolian sand and dust, Yamal region, northwest Siberia	NA	Environmental Conservation	Pdf cannot be obtained (and sites are not in the temperate bioclimatic region)
WOS_9584	WOS	10.1016/S0378-1127(98)00354-5	1999	Ford, W. M.; Menzel, M. A.; McGill, D. W.; Laerm, J.; McCay, T. S.	Effects of a community restoration fire on small mammals and herpetofauna in the southern Appalachians	NA	Forest Ecology and Management	The document meets exclusion criteria for waterways
WOS_9586	WOS	10.1016/S0378-1127(00)00597-1	2001	Ford, W. M.; Rodrigue, J. L.	Soricid abundance in partial overstory removal harvests and riparian areas in an industrial forest landscape of the central Appalachians	NA	Forest Ecology and Management	The document meets exclusion criteria for waterways
WOS_9588	WOS	10.2193/0022-541X(2006)70[1200:PAAOBA]2.0.CO;2	2006	Ford, W. Mark; Menzel, Jennifer M.; Menzel, Michael A.; Edwards, John W.; Kilgo, John C.	Presence and absence of bats across habitat scales in the upper Coastal Plain of south Carolina	NA	Journal of Wildlife Management	Sampling points are not on verges (exposure)
ZR_12583	ZR	NA	2007	Ford, W. Mark; Mertz, Kely N.; Menzel, Jennifer M.; Sturm, Kenneth K.	Winter home range and habitat use of the Virginia northern flying squirrel (Glaucomys sabrinus fuscus).	NA	NA	The document meets previous screening exclusion criteria (Exposure)
WOS_9592	WOS	NA	2012	Forero-Medina, German; Cardenas-Arevalo, Gladys; Castano-Mora, Olga V.	HABITAT MODELING OF DAHL'S TOAD-HEADED TURTLE (MESOCLEMMYS DAHLI) IN COLOMBIA	NA	Herpetological Conservation and Biology	Sites are not in the bioclimatic region
WOS_9604	WOS	10.1046/j.1523-1739.2000.99088.x	2000	Forman, R. T. T.; Deblinger, R. D.	The ecological road-effect zone of a Massachusetts (USA) suburban highway	NA	Conservation Biology	Sites are not in the bioclimatic region
ACTU_WOS_F_791	WOS	10.1111/rec.12495	2017	Forrester, TR; Green, DJ; McKibbin, R; Bishop, CA	Evaluating the efficacy of seasonal grazing and livestock exclusion as restoration tools for birds in riparian habitat of the Okanagan Valley, British Columbia, Canada	NA	NA	Sites are not in the bioclimatic region
WOS_9637	WOS	10.1071/WR96081	1997	Fortin, D.; Arnold, G. W.	The influence of road verges on the use of nearby small shrubland remnants by birds in the central wheatbelt of Western Australia	NA	Wildlife Research	Sites are not in the bioclimatic region
WOS_9644	WOS	NA	2012	Fortney, Ashley N.; Poulin, Ray G.; Martino, Jessica A.; Parker, Dennilyn L.; Somers, Christopher M.	Proximity to Hibernacula and Road Type Influence Potential Road Mortality of Snakes in Southwestern Saskatchewan	NA	Canadian Field-Naturalist	Sites are not in the bioclimatic region
WOS_9681	WOS	10.1007/BF03194194	2007	Fournier, Pascal; Maizeret, Chyistian; Jimenez, David; Chusseau, Jean-Pierre; Aulagnier, Stephane; Spitz, Francois	Habitat utilization by sympatric European mink Mustela lutreola and polecats Mustela putorius in south-western France	NA	Acta Theriologica	Results are in an unexploitable format
WOS_9694	WOS	10.1577/M05-024.1	2007	Fox, Martin; Bolton, Susan	A regional and geomorphic reference for quantities and volumes of instream wood in unmanaged forested basins of Washington State	NA	North American Journal of Fisheries Management	The document meets previous screening exclusion criteria (Outcome)
ZR_12617	ZR	NA	2015	Foysal, Mohammod	OBSERVATIONS OF RED-HEADED FALCON FALCO CHICQUERA (AVES: FALCONIFORMES: FALCONIDAE) NEST AT KERANIGANJ, DHAKA, BANGLADESH, WITH A FOCUS ON POST-FLEDGING BEHAVIOR.	NA	NA	Sites are not in the bioclimatic region
WOS_9727	WOS	10.1371/journal.pone.0027052	2011	Francis, Clinton D.; Ortega, Catherine P.; Cruz, Alexander	Noise Pollution Filters Bird Communities Based on Vocal Frequency	NA	Plos One	Sites are not in the bioclimatic region
ZR_12628	ZR	NA	2015	Francis, Mitchell J.; Spooner, Peter G.; Matthews, Alison	The influence of urban encroachment on squirrel gliders (Petaurus norfolcensis): effects of road density, light and noise pollution.	NA	NA	Sampling points are not on verges (exposure)
ACTU_WOS_F_63	WOS	10.1650/CONDOR-17-130.1	2018	Frantz, MW; Wood, PB; Sheehan, J; George, G	Demographic response of Louisiana Waterthrush, a stream obligate songbird of conservation concern, to shale gas development	NA	NA	The document meets exclusion criteria for waterways
ACTU_ZR_T_675	ZR	NA	2016	Franzen, Michael	The common wall lizard (Podarcis muralis) in Kiefersfelden (Upper Bavaria).	NA	NA	Language is not English or French
WOS_9786	WOS	10.1071/WR04021	2005	Fraser, F. J.; Whitehead, P. J.	Predation of artificial ground nests in Australian tropical savannas: inverse edge effects	NA	Wildlife Research	Sites are not in the bioclimatic region
ZR_12649	ZR	NA	2007	Fraser, Heather R.; Parker-Geisman, Vanessa; Parish, George R.	Hawaiian hoary bat inventory in national parks on the islands of Hawai'i, Maui and Moloka'i.	NA	NA	Sites are not in the bioclimatic region
WOS_9797	WOS	10.1016/j.foreco.2003.12.012	2004	Fredericksen, N. J.; Fredericksen, T. S.	Impacts of selective logging on amphibians in a Bolivian tropical humid forest	NA	Forest Ecology and Management	Sites are not in the bioclimatic region
WOS_9798	WOS	10.1016/S0378-1127(99)00199-1	2000	Fredericksen, T. S.; Mostacedo, B.	Regeneration of timber species following selection logging in a Bolivian tropical dry forest	NA	Forest Ecology and Management	Sites are not in the bioclimatic region
ACTU_WOS_F_3152	WOS	10.1371/journal.pone.0144258	2015	Free, CL; Baxter, GS; Dickman, CR; Lisle, A; Leung, LKP	Diversity and Community Composition of Vertebrates in Desert River Habitats	NA	NA	Sites are not in the bioclimatic region
WOS_9803	WOS	10.1016/0006-3207(80)90073-7	1980	FREE, JB; WILLIAMS, IH	THE VALUE OF WHITE CLOVER TRIFOLIUM-REPENS L, CULTIVAR S100 PLANTED ON MOTORWAY VERGES TO HONEYBEES APIS-MELLIFERA L	NA	Biological Conservation	The document meets previous screening exclusion criteria (Exposure)
ZR_2909	ZR	NA	2011	Freixas, Lidia; Pertierra, Desiree; Torre, Ignasi; Arrizabalaga, Antoni	[Monitoring of populations of the common dormouse (Glis glis) in the NE of the Iberian Peninsula.]	NA	NA	Language is not English or French
WOS_9831	WOS	NA	2001	French, B. I.; Mezquita, F.; Griffiths, H. I.	Habitat variables affecting the occurrence of Neomys fodiens (Mammalia, Insectivora) in Kent, UK	NA	Folia Zoologica	The comparator is inappropriate
WOS_9835	WOS	10.1071/MU02018	2003	French, K.; Paterson, I.; Miller, J.; Turner, R. J.	Nectarivorous bird assemblages in Box-Ironbark woodlands in the Capertee Valley, New South Wales	NA	Emu	The comparator is inappropriate
WOS_9838	WOS	10.1007/s10980-013-9887-8	2013	Freudenberger, Lisa; Hobson, Peter R.; Rupic, Slaven; Pe'er, Guy; Schluck, Martin; Sauermann, Julia; Kreft, Stefan; Selva, Nuria; Ibisch, Pierre L.	Spatial road disturbance index (SPROADI) for conservation planning: a novel landscape index, demonstrated for the State of Brandenburg, Germany	NA	Landscape Ecology	The study type is inappropriate (no data, simulation, recommendation)
ACTU_ZR_F_189	ZR	NA	2017	Frey, Jennifer K.	Landscape Scale and Microhabitat of the Endangered New Mexico Meadow Jumping Mouse in the White Mountains, Arizona.	NA	NA	Results are in an unexploitable format
WOS_9845	WOS	10.1515/mammalia-2013-0036	2014	Frey, Jennifer K.; Calkins, Michael T.	Snow cover and riparian habitat determine the distribution of the short-tailed weasel (Mustela erminea) at its southern range limits in arid western North America	NA	Mammalia	The study type is inappropriate (no data, simulation, recommendation)
WOS_9846	WOS	10.1894/0038-4909(2008)53[248:DAHOTA]2.0.CO;2	2008	Frey, Jennifer K.; Hill, Michael T.; Christman, Bruce L.; Truett, Joe C.; MacDonald, Stephen O.	Distribution and habitat of the Arizona gray squirrel (Sciurus arizonensis) in New Mexico	NA	Southwestern Naturalist	The study type is inappropriate (no data, simulation, recommendation)
WOS_9849	WOS	10.2193/0022-541X(2006)70[1111:HUBMIA]2.0.CO;2	2006	Frey, S. Nicole; Conover, Michael R.	Habitat use by meso-predators in a corridor environment	NA	Journal of Wildlife Management	Sites are not in the bioclimatic region
WOS_9858	WOS	10.1890/06-1021	2007	Frick, Winifred F.; Rainey, William E.; Pierson, Elizabeth D.	Potential effects of environmental contamination on Yuma Myotis demography and population growth	NA	Ecological Applications	The document meets previous screening exclusion criteria (Outcome)
ACTU_GREY_LITT_97	GREY_LITT_Yannick Autret	10.25225/fozo.v67.i2.a10.2018	2018	Friebe, Kathrin; Steffens, Thomas; Schulz, Björn; Valqui, Juan; Reck, Heinrich; Hartl, Georg	The significance of major roads as barriers and their roadside habitats as potential corridors for hazel dormouse migration – a population genetic study	NA	Folia Zoologica	The comparator is inappropriate
WOS_9883	WOS	10.1139/F05-020	2005	Frimpong, E. A.; Sutton, T. M.; Lim, K. J.; Hrodey, P. J.; Engel, B. A.; Simon, T. P.; Lee, J. G.; Le Master, D. C.	Determination of optimal riparian forest buffer dimensions for stream biota-landscape association models using multimetric and multivariate responses	NA	Canadian Journal of Fisheries and Aquatic Sciences	The document meets previous screening exclusion criteria (Population)
ZR_2935	ZR	NA	2003	Frochot, Bernard; Eybert, Marie-Christine; Journaux, Ludovic; Roche, Jean; Faivre, Bruno	Nesting birds assemblages along the River Loire: results from a 12 years-study.		NA	The comparator is inappropriate
ZR_12676	ZR	NA	2013	Froehlich, Arkadiusz; Ciach, Michal	Distribution and abundance of the Syrian Woodpecker Dendrocopos syriacus in Krakow.	NA	NA	Language is not English or French
ACTU_WOS_T_9564	WOS	10.1017/S0266467415000450	2015	Froese, GZL; Contasti, AL; Mustari, AH; Brodie, JF	Disturbance impacts on large rain-forest vertebrates differ with edge type and regional context in Sulawesi, Indonesia	NA	NA	Sites are not in the bioclimatic region
WOS_9924	WOS	10.1002/rrr.3450070303	1992	FRUGET, JF	ECOLOGY OF THE LOWER RHONE AFTER 200 YEARS OF HUMAN INFLUENCE - A REVIEW	NA	Regulated Rivers-Research & Management	The document is a review
ZR_12684	ZR	NA	2007	Fuentes, Esteban; Olsen, Jerry; Rose, A. B.	Diet, occupancy and breeding performance of wedge-tailed eagles Aquila audax near Canberra, Australia 2002-2003: four decades after Leopold and Wolfe.		NA	Sampling points are not on verges (exposure)
WOS_9957	WOS	10.1111/j.1365-2656.2009.01551.x	2009	Fuentes-Montemayor, Elisa; Cuaron, Alfredo D.; Vazquez-Dominguez, Ella; Benitez-Malvido, Julieta; Valenzuela-Galvan, David; Andresen, Ellen	Living on the edge: roads and edge effects on small mammal populations	NA	Journal of Animal Ecology	Sites are not in the bioclimatic region
ZR_2950	ZR	NA	1994	Fujimaki, Yuzo	Birds of Tokachi District, Hokkaido. 6. Birds along the middle reaches of the Tokachi River.	NA	NA	Language is not English or French
ZR_2951	ZR	NA	2000	Fujimaki, Yuzo	Birds of Tokachi district, Hokkaido 8. Birds along the lower and middle reaches of the Satsunai River.	NA	NA	Language is not English or French
WOS_9974	WOS	10.1016/j.biocon.2009.02.024	2009	Fujita, Go; Totsu, Kumiko; Shibata, Emi; Matsuoka, Yoshimi; Morita, Hiroyuki; Kitamura, Wataru; Kuramoto, Noboru; Masuda, Naoya; Higuchi, Hiroyoshi	Habitat management of little terns in Japan's highly developed landscape	NA	Biological Conservation	The document meets previous screening exclusion criteria (Exposure)
WOS_9992	WOS	10.1111/j.1365-2656.2006.01146.x	2006	Fukui, Dai; Murakami, Masashi; Nakano, Shigeru; Aoi, Toshiki	Effect of emergent aquatic insects on bat foraging in a riparian forest	NA	Journal of Animal Ecology	Sites are not in the bioclimatic region
ZR_12700	ZR	10.2326/1347-0558(2008)7[47:REFARA]2.0.CO;2	2008	Fulton, Graham R.; Smith, Mercedes; Choi, Mee Na; Takahashi, Sanae	Road ecology from a road-side assemblage of forest birds in south-western Australia.		NA	The comparator is inappropriate
WOS_10020	WOS	10.1111/j.1469-7998.2009.00682.x	2010	Funston, P. J.; Frank, L.; Stephens, T.; Davidson, Z.; Loveridge, A.; Macdonald, D. M.; Durant, S.; Packer, C.; Mosser, A.; Ferreira, S. M.	Substrate and species constraints on the use of track incidences to estimate African large carnivore abundance	NA	Journal of Zoology	The document meets previous screening exclusion criteria (Exposure)
WOS_10034	WOS	10.1046/j.1365-2427.2001.00756.x	2001	Fustec, J.; Lode, T.; Le Jacques, D.; Cormier, J. P.	Colonization, riparian habitat selection and home range size in a reintroduced population of European beavers in the Loire		NA	The comparator is inappropriate
WOS_10047	WOS	NA	2013	Gaceu, Ovidiu; Josan, Ioana	Note on the occurrence of Darevskia pontica (Reptilia) north of the Mures River, in Metaliferi Mountains, western Romania	NA	North-Western Journal of Zoology	The document meets previous screening exclusion criteria (Exposure)
ACTU_WOS_T_9942	WOS	10.1007/s11252-015-0465-5	2015	Gagne, SA; Bates, JL; Bierregaard, RO	The effects of road and landscape characteristics on the likelihood of a Barred Owl (Strix varia)-vehicle collision	NA	NA	The document meets previous screening exclusion criteria (Outcome)
WOS_10073	WOS	10.2193/2006-224	2007	Gagnon, Jeffrey W.; Theimer, Tad C.; Dodd, Norris L.; Boe, Susan; Schweinsburg, Raymond E.	Traffic volume alters elk distribution and highway crossings in Arizona		NA	The comparator is inappropriate
ACTU_GREY_LITT_63	GREY_LITT_ITTECOP	NA	2012	Gaillard, Jean-Michel; Hemery, Arzhela; Bonenfant, Christophe; Basille, Mathieu; Marboutin, Éric; Mauz, Isabelle; Doré, Antoine	Mise au point d’un modèle de diagnostic des interactions entre structures paysagères, infrastructures de transports terrestres et espèces emblématiques Le cas du Lynx dans le massif jurassien. Rapport final	NA	NA	The document meets previous screening exclusion criteria (Outcome)
ZR_2989	ZR	NA	2014	Galan, Pedro	Herpetofauna of Fragas do Etune Natural Park (A Coruna): distribution, conservation status and threats.	NA	NA	Language is not English or French
ACTU_WOS_T_3724	WOS	10.1007/s10344-017-1076-7	2017	Galantinho, A; Eufrazio, S; Silva, C; Carvalho, F; Alpizar-Jara, R; Mira, A	Road effects on demographic traits of small mammal populations		NA	Sampling points are not on verges (exposure)
WOS_10101	WOS	10.1017/S0959270906000037	2006	Gale, G. A.; Thongaree, S.	Density estimates of nine hornbill species in a lowland forest site in southern Thailand	NA	Bird Conservation International	Sites are not in the bioclimatic region
WOS_10108	WOS	NA	1997	GalindoLeal, C.; Zuleta, G.	The distribution, habitat, and conservation status of the Pacific Water Shrew, Sorex bendirii, in British Columbia	NA	Canadian Field-Naturalist	The document meets exclusion criteria for waterways
WOS_10117	WOS	10.1139/Z09-035	2009	Gallant, D.; Vasseur, L.; Dumond, M.; Tremblay, E.; Berube, C. H.	Habitat selection by river otters (Lontra canadensis) under contrasting land-use regimes	NA	Canadian Journal of Zoology-Revue Canadienne De Zoologie	Sites are not in the bioclimatic region
WOS_10122	WOS	10.2744/CCB-0643.1	2008	Gallego-Garcia, Natalia; Castano-Mora, Olga Victoria	Ecology and status of the Magdalena river turtle, Podocnemis lewyana, a Colombian endemic	NA	Chelonian Conservation and Biology	Sites are not in the bioclimatic region
WOS_10124	WOS	10.1016/j.mambio.2012.04.003	2012	Galliez, Maron; Fernandez, Fernando A. S.	Spatial segregation between the water opossum Chironectes minimus and the water rat Nectomys squamipes: Just competition avoidance or a conservation problem as well?		NA	The comparator is inappropriate
WOS_10131	WOS	NA	2008	Gallo-Reynoso, Juan Pablo; Ramos-Rosas, Nadia Nayeli; Rangel-Aguilar, Oscar	Aquatic bird predation by neotropical river otter (Lontra longicaudis annectens), at Rio Yaqui, Sonora, Mexico	NA	Revista Mexicana De Biodiversidad	Language is not English or French
ACTU_WOS_F_3385	WOS	10.3398/064.075.0306	2015	Ganey, JL; Block, WM; Sanderlin, JS; Iniguez, JM	COMPARATIVE NEST-SITE HABITAT OF PAINTED REDSTARTS AND RED-FACED WARBLERS IN THE MADREAN SKY ISLANDS OF SOUTHEASTERN ARIZONA	NA	NA	Sites are not in the bioclimatic region
WOS_10188	WOS	10.1080/01650521.2013.875245	2013	Gantchoff, Mariela G.; Belant, Jerrold L.; Masson, Diego A.	Occurrence of invasive mammals in southern Nahuel Huapi National Park		NA	The comparator is inappropriate
WOS_10189	WOS	10.1016/j.mambio.2014.10.001	2015	Gantchoff, Mariela Gisele; Belant, Jerrold L.	Anthropogenic and environmental effects on invasive mammal distribution in northern Patagonia, Argentina		NA	Sampling points are not on verges (exposure)
ZR_12748	ZR	NA	2014	Ganzeboom, P. D.	Ground-dwelling Hobbies Falco subbuteo.	NA	NA	Language is not English or French
WOS_10241	WOS	10.1007/s10531-007-9154-x	2007	Garcia, Juan D. Delgado; Arevalo, Jose R.; Fernandez-Palacios, Jose Maria	Road edge effect on the abundance of the lizard Gallotia galloti (Sauria : Lacertidae) in two Canary Islands forests		NA	Results are in an unexploitable format
ZR_12755	ZR	NA	2009	Garcia, Sergi; Puig, Xavier; Peris, Albert	Activity and use of the space by the European hedgehog (Erinaceus europaeus Linnaeus, 1758).	NA	NA	Language is not English or French
ACTU_WOS_T_1774	WOS	10.1002/ece3.3459	2017	Garcia, VOS; Ivy, C; Fu, JZ	Syntopic frogs reveal different patterns of interaction with the landscape: A comparative landscape genetic study of Pelophylax nigromaculatus and Fejervarya limnocharis from central China	NA	NA	The document meets previous screening exclusion criteria (Exposure)
ZR_3037	ZR	NA	2002	Garcia-Gonzalez, Ana Ma; Lizana, Miguel; Perez-Alonso, Juan Carlos	American mink (Mustela vison) distribution and habitat use in river Tormes, Salamanca.	NA	NA	Pdf cannot be obtained
WOS_10276	WOS	10.1007/s00267-011-9623-6	2011	Gardali, Thomas; Holmes, Aaron L.	Maximizing Benefits from Riparian Revegetation Efforts: Local- and Landscape-Level Determinants of Avian Response		NA	Sampling points are not on verges (exposure)
WOS_10277	WOS	10.1111/j.1526-100X.2006.00147.x	2006	Gardali, Thomas; Holmes, Aaron L.; Small, Stacy L.; Nur, Nadav; Geupel, Geoffrey R.; Golet, Gregory H.	Abundance patterns of landbirds in restored and remnant riparian forests on the Sacramento River, California, USA		NA	Sampling points are not on verges (exposure)
WOS_10281	WOS	10.1002/jwmg.555	2013	Gardiner, Laura E.; Somers, Christopher M.; Martino, Jessica A.; Parker, Dennilyn L.; Poulin, Ray G.	Balancing the dumbbell: Summer habitats need protection in addition to winter dens for northern snake communities	NA	Journal of Wildlife Management	Sites are not in the bioclimatic region
ZR_12765	ZR	10.2307/2425541	1984	Garland, T.; Bradley, W. G.	Effects of a highway on Mojave Desert rodent populations.	NA	NA	Sites are not in the bioclimatic region
WOS_10352	WOS	10.1656/1528-7092(2003)002[0301:ANPARF]2.0.CO;2	2003	Gates, J. E.; McKearnan, J. E.	Artificial nest predation across riparian-upland forest ecotones	NA	Southeastern Naturalist	The document meets exclusion criteria for waterways
WOS_10373	WOS	10.1007/s10764-005-4363-1	2005	Gautier-Hion, A.; Brugiere, D.	Significance of riparian forests for the conservation of Central African primates	NA	International Journal of Primatology	Sites are not in the bioclimatic region
WOS_10382	WOS	10.1139/Z06-175	2006	Gavin, S. D.; Komers, P. E.	Do pronghorn (Antilocapra americana) perceive roads as a predation risk?	NA	Canadian Journal of Zoology-Revue Canadienne De Zoologie	Sites are not in the bioclimatic region
WOS_10426	WOS	10.1007/BF01866454	1980	GEIBERT, EH	SONGBIRD DIVERSITY ALONG AN URBAN POWERLINE RIGHT-OF-WAY IN RHODE-ISLAND		NA	The comparator is inappropriate
ACTU_ZR_F_169	ZR	NA	2017	Geise, Lena; Pereira, Luciana G.; Astua, Diego; Aguieiras, Marcia; Lessa, Leonardo G.; Asfora, Paulo H.; Dourado, Francisco; Esberard, Carlos E.L.	TERRESTRIAL MAMMALS OF THE JEQUITINHONHA RIVER BASIN, BRAZIL: A TRANSITION AREA BETWEEN ATLANTIC FOREST AND CERRADO.	NA	NA	Sites are not in the bioclimatic region
ZR_3084	ZR	NA	2013	Gelarden, Carly J.; McLaughlin, John F.	Forecasting Avian Responses to Elwha River Restoration.	NA	NA	The study type is inappropriate (no data, simulation, recommendation)
WOS_10455	WOS	10.1894/0038-4909(2004)049<0111:WEOTEF>2.0.CO;2	2004	Geluso, K.	Westward expansion of the eastern fox squirrel (Sciurus niger) in northeastern New Mexico and southeastern Colorado		NA	The comparator is inappropriate
ZR_3089	ZR	NA	2006	Geluso, Keith	Bats in a human-made forest of central Nebraska.	NA	NA	Sites are not in the bioclimatic region
WOS_10459	WOS	10.1650/0010-5422(2001)103[0624:PDIRFO]2.0.CO;2	2001	Gende, S. M.; Willson, M. F.	Passerine densities in riparian forests of southeast Alaska: Potential effects of anadromous spawning salmon	NA	Condor	Sites are not in the bioclimatic region
WOS_10474	WOS	10.1650/0010-5422(2006)108[0140:SRANSO]2.0.CO;2	2006	Gentry, D. J.; Swanson, D. L.; Carlisle, J. D.	Species richness and nesting success of migrant forest birds in natural river corridors and anthropogenic woodlands in Southeastern South Dakota	NA	Condor	Sites are not in the bioclimatic region
WOS_10496	WOS	NA	2012	Gerardo Avila-Torresagaton, Luis; Hidalgo-Mihart, Mircea; Antonio Guerrero, Jose	The importance of Palenque, Chiapas, for the conservation of Mexican bats	NA	Revista Mexicana De Biodiversidad	Language is not English or French
ZR_12810	ZR	NA	2009	Gerdzhikov, Georgi P.; Demerdzhiev, Dimitar A.	Data on Bird Mortality in "Sakar" IBA (BG021), Caused by Hazardous Power Lines.	NA	NA	The document meets previous screening exclusion criteria (Exposure)
WOS_10511	WOS	10.1002/(SICI)1522-2632(200003)85:1<123::AID-IROH123>3.3.CO;2-K	2000	Gerhard, M.; Reich, M.	Restoration of streams with large wood: Effects of accumulated and built-in wood on channel morphology, habitat diversity and aquatic fauna	NA	International Review of Hydrobiology	The document meets exclusion criteria for waterways
ACTU_WOS_T_3087	WOS	10.1002/ecs2.1817	2017	Germaine, SS; Carter, SK; Ignizio, DA; Freeman, AT	Relationships between gas field development and the presence and abundance of pygmy rabbits in southwestern Wyoming	NA	NA	Sites are not in the bioclimatic region
ZR_3121	ZR	NA	2006	Germano, David J.	Habitat characteristics of sites with yellow-blotched salamanders (Ensatina eschscholtzii croceator).	NA	NA	Sites are not in the bioclimatic region
WOS_10529	WOS	10.1016/j.mambio.2012.07.157	2013	Gerwing, Travis G.; Johnson, Chris J.; Alstroem-Rapaport, Cecilia	Factors influencing forage selection by the North American beaver (Castor canadensis)	NA	Mammalian Biology	Sites are not in the bioclimatic region
WOS_10570	WOS	NA	2009	Gherghel, Iulian; Strugariu, Alexandru; Sahlean, Tiberiu C.; Zamfirescu, Oana	Anthropogenic impact or anthropogenic accommodation? Distribution range expansion of the common wall lizard (Podarcis muralis) by means of artificial habitats in the north-eastern limits of its distribution range	NA	Acta Herpetologica	Sites are not in the bioclimatic region
ACTU_ZR_T_1078	ZR	NA	2016	Ghisolfi, Marco	Distribution and density of nesting sites of Italian swallow (Passer domesticus italiae, Vieillot, 1817) and tree sparrow (Passer montanus montanus, Linnaeus, 1758) straying in a rural context of the Padana Plain in the Lombardy region.	NA	NA	Language is not English or French
WOS_10625	WOS	10.1016/S0006-3207(01)00131-8	2002	Gibeau, M. L.; Clevenger, A. P.; Herrero, S.; Wierzchowski, J.	Grizzly bear response to human development and activities in the Bow River Watershed, Alberta, Canada	NA	Biological Conservation	Sites are not in the bioclimatic region
WOS_10633	WOS	10.1002/aqc.2432	2014	Gibson, Polly P.; Olden, Julian D.	Ecology, management, and conservation implications of North American beaver (Castor canadensis) in dryland streams	NA	Aquatic Conservation-Marine and Freshwater Ecosystems	The document is a review
WOS_10672	WOS	10.1002/wsb.272	2013	Gillan, Jeffrey K.; Strand, Eva K.; Karl, Jason W.; Reese, Kerry P.; Laninga, Tamara	Using Spatial Statistics and Point-Pattern Simulations to Assess the Spatial Dependency Between Greater Sage-Grouse and Anthropogenic Features		NA	Sampling points are not on verges (exposure)
WOS_10677	WOS	10.1071/WR9960049	1996	Gillespie, G. R.; Hollis, G. J.	Distribution and habitat of the spotted tree frog, Litoria spenceri Dubois (Anura: Hylidae), and an assessment of potential causes of population declines		NA	Results are in an unexploitable format
WOS_10678	WOS	10.1017/S0266467404001361	2004	Gillespie, G. R.; Lockie, D.; Scroggie, M. P.; Iskandar, D. T.	Habitat use by stream-breeding frogs in south-east Sulawesi, with some preliminary observations on community organization	NA	Journal of Tropical Ecology	Sites are not in the bioclimatic region
WOS_10680	WOS	10.1007/s10661-014-3677-x	2014	Gillet, Allisyn-Marie Tsz Yan; Seewagen, Chad L.	Mercury exposure of a wetland songbird, Agelaius phoeniceus, in the New York metropolitan area and its effect on nestling growth rate	NA	Environmental Monitoring and Assessment	The document meets previous screening exclusion criteria (Outcome)
WOS_10682	WOS	10.3161/150811010X537954	2010	Gilley, L. Michelle; Kennedy, Michael L.	A test of mist-net configurations in capturing bats over stream corridors		NA	Results are in an unexploitable format
WOS_10684	WOS	NA	2011	Gillies, Cameron S.; Beyer, Hawthorne L.; St Clair, Colleen Cassady	Fine-scale movement decisions of tropical forest birds in a fragmented landscape	NA	Ecological Applications	Sites are not in the bioclimatic region
WOS_10685	WOS	10.1073/pnas.0803530105	2008	Gillies, Cameron S.; Clair, Colleen Cassady St	Riparian corridors enhance movement of a forest specialist bird in fragmented tropical forest	NA	Proceedings of the National Academy of Sciences of the United States of America	Sites are not in the bioclimatic region
WOS_10686	WOS	10.1111/j.1365-2664.2009.01756.x	2010	Gillies, Cameron S.; St Clair, Colleen Cassady	Functional responses in habitat selection by tropical birds moving through fragmented forest	NA	Journal of Applied Ecology	Sites are not in the bioclimatic region
ACTU_WOS_T_379	WOS	10.1007/s10344-018-1172-3	2018	Giordano, C; Lyra-Jorge, MC; Miotto, RA; Pivello, VR	Food habits of three carnivores in a mosaic landscape of Sao Paulo state, Brazil	NA	NA	Sites are not in the bioclimatic region
ACTU_WOS_T_137	WOS	10.1371/journal.pone.0197286	2018	Giosa, E; Mammides, C; Zotos, S	The importance of artificial wetlands for birds: A case study from Cyprus	NA	NA	The document meets previous screening exclusion criteria (Exposure)
WOS_10734	WOS	10.7550/rmb.43765	2014	Giraudo, Alejandro R.; Arzamendia, Vanesa; Bellini, Gisela P.; Bessa, Carla A.; Belen Costanzo, Maria	Ecology of the large South American snake, Hydrodynastes gigas (Serpentes: Dipsadidae)	NA	Revista Mexicana De Biodiversidad	Language is not English or French
WOS_10745	WOS	10.1016/j.biocon.2009.12.016	2010	Girvetz, Evan H.	Removing erosion control projects increases bank swallow (Riparia riparia) population viability modeled along the Sacramento River, California, USA	NA	Biological Conservation	The study type is inappropriate (no data, simulation, recommendation)
WOS_10758	WOS	10.1111/j.1557-9263.2007.00097.x	2007	Giudice, John H.; Haroldson, Kurt J.	Using regional wildlife surveys to assess the CRP: scale and data-quality issues	NA	Journal of Field Ornithology	Sites are not in the bioclimatic region
WOS_10760	WOS	10.2307/4003857	2004	Giuliano, W. M.; Homyack, J. D.	Short-term grazing exclusion effects on riparian small mammal communities	NA	Journal of Range Management	The document meets exclusion criteria for waterways
WOS_10762	WOS	NA	2003	Giusti, G. A.; Keiffer, R. J.; Vaughn, C. E.	The bird community of an oak woodland stream	NA	California Fish and Game	Pdf cannot be obtained
ACTU_WOS_F_3470	WOS	10.1111/jofo.12105	2015	Glass, JR; Floyd, CH	Effects of proximity to riparian zones on avian species richness and abundance in montane aspen woodlands	NA	NA	Sites are not in the bioclimatic region
WOS_10801	WOS	10.1016/j.landurbplan.2008.11.001	2009	Glista, David J.; DeVault, Travis L.; DeWoody, J. Andrew	A review of mitigation measures for reducing wildlife mortality on roadways	NA	Landscape and Urban Planning	The document is a review
EM_221	GREY_LITT_email_request	NA	NA	Gloucestershire Highways	Highways & Biodiversity 2009-2014 – Gloucestershire Highways Biodiversity Plan	NA	NA	The type of document is not appropriate
WOS_10805	WOS	NA	1994	GLOVA, GJ; SAGAR, PM	COMPARISON OF FISH AND MACROINVERTEBRATE STANDING STOCKS IN RELATION TO RIPARIAN WILLOWS (SALIX SPP) IN 3 NEW-ZEALAND STREAMS	NA	New Zealand Journal of Marine and Freshwater Research	The document does not dealt with our 6 specific questions
WOS_10812	WOS	10.1016/j.biocon.2007.05.016	2007	Goates, Michael C.; Hatcha, Kent A.; Eggett, Dennis L.	The need to ground truth 30.5 m buffers: A case study of the boreal toad (Bufo boreas)	NA	Biological Conservation	The document meets exclusion criteria for waterways
WOS_10826	WOS	10.1007/s11284-009-0655-9	2010	Godinho, Carlos; Rabaca, Joao E.; Segurado, Pedro	Breeding bird assemblages in riparian galleries of the Guadiana River basin (Portugal): the effect of spatial structure and habitat variables		NA	Results are in an unexploitable format
WOS_10836	WOS	10.1023/A:1008807328566	1999	Godreau, V.; Bornette, G.; Frochot, B.; Amoros, C.; Castella, E.; Oertli, B.; Chambaud, F.; Oberti, D.; Craney, E.	Biodiversity in the floodplain of Saone: a global approach	NA	Biodiversity and Conservation	The document is a review
WOS_10874	WOS	NA	2011	Goiti, Urtzi; Aihartza, Joxerra; Guiu, Maider; Salsamendi, Egoitz; Almenar, David; Napal, Maria; Garin, Inazio	Geoffroy's bat, Myotis emarginatus, preys preferentially on spiders in multistratified dense habitats: a study of foraging bats in the Mediterranean	NA	Folia Zoologica	The document meets previous screening exclusion criteria (Exposure)
WOS_10901	WOS	10.1071/WR96116	1997	Goldingay, R. L.; Whelan, R. J.	Powerline easements: Do they promote edge effects in eucalypt forest for small mammals?	NA	Wildlife Research	The document meets previous screening exclusion criteria (Exposure)
WOS_10904	WOS	10.1071/ZO09003	2009	Goldingay, Ross L.; Taylor, Brendan D.	Gliding performance and its relevance to gap crossing by the squirrel glider (Petaurus norfolcensis)	NA	Australian Journal of Zoology	The document meets previous screening exclusion criteria (Exposure)
ZR_12914	ZR	NA	2011	Goldingay, Ross L.; Taylor, Brendan D.; Ball, Tina	Wooden poles can provide habitat connectivity for a gliding mammal.	NA	NA	Sites are not in the bioclimatic region
WOS_10910	WOS	10.2193/0022-541X(2005)069[0525:SRORAA]2.0.CO;2	2005	Goldstein, M. I.; Wilkins, R. N.; Lacher, T. E.	Spatiotemporal responses of reptiles and amphibians to timber harvest treatments	NA	Journal of Wildlife Management	The document meets exclusion criteria for waterways
WOS_10916	WOS	10.1002/rra.1588	2013	Golet, G. H.; Hunt, J. W.; Koenig, D.	DECLINE AND RECOVERY OF SMALL MAMMALS AFTER FLOODING: IMPLICATIONS FOR PEST MANAGEMENT AND FLOODPLAIN COMMUNITY DYNAMICS		NA	Sampling points are not on verges (exposure)
ZR_3226	ZR	NA	2008	Golet, Gregory H.; Gardali, Thomas; Howell, Christine A.; Hunt, John; Luster, Ryan A.; Rainey, William; Roberts, Michael D.; Silveira, Joseph; Swagerty, Helen; Williams, Neal	Wildlife response to riparian restoration on the Sacramento River.	NA	NA	The document is a review
WOS_10917	WOS	10.1111/j.1526-100X.2009.00525.x	2011	Golet, Gregory H.; Gardali, Thomas; Hunt, John W.; Koenig, David A.; Williams, Neal M.	Temporal and Taxonomic Variability in Response of Fauna to Riparian Restoration	NA	Restoration Ecology	The document meets previous screening exclusion criteria (Exposure)
WOS_10933	WOS	10.1007/s11284-008-0515-z	2009	Gomes, Luis; Grilo, Clara; Silva, Clara; Mira, Antonio	Identification methods and deterministic factors of owl roadkill hotspot locations in Mediterranean landscapes	NA	Ecological Research	The document meets previous screening exclusion criteria (Outcome)
WOS_10944	WOS	NA	1996	Gomez, D. M.; Anthony, R. G.	Amphibian and reptile abundance in riparian and upslope areas of five forest types in western Oregon		NA	Results are in an unexploitable format
WOS_10945	WOS	NA	1998	Gomez, D. M.; Anthony, R. G.	Small mammal abundance in riparian and upland areas of five seral stages in western Oregon		NA	Results are in an unexploitable format
ACTU_WOS_F_2946	WOS	NA	2016	Gomez, D; Rivera, L; Politi, N; Ruggera, R	Bird assemblages of riparian forests of premontane forests in northwestern Argentina	NA	NA	Language is not English or French
WOS_10959	WOS	10.7550/rmb.25126	2012	Gomez-Villafane, Isabel E.; Exposito, Yanina; San Martin, Alvaro; Picca, Pablo; Busch, Maria	Rodent diversity and habitat use in a protected area of Buenos Aires province, Argentina		NA	Sampling points are not on verges (exposure)
WOS_10976	WOS	10.1007/s10457-011-9439-7	2012	Goncalves, Paula; Alcobia, Sandra; Simoes, Luciana; Santos-Reis, Margarida	Effects of management options on mammal richness in a Mediterranean agro-silvo-pastoral system	NA	Agroforestry Systems	The document meets exclusion criteria for waterways
ZR_3244	ZR	NA	2005	Gong, Shi-ping; Shi, Hai-tao; Xie, Cai-jian; Chen, Chuan; Xu, Ru-mei	Spring habitat selection by four eye-spotted turtle (Sacalia quadriocellata) in Limu Mountain of Hainan Island.	NA	NA	Language is not English or French
WOS_10995	WOS	10.1007/BF03192416	2001	Gonzalez, E. M.; Soutullo, A.; Altuna, C. A.	The burrow of Dasypus hybridus (Cingulata : Dasypodidae)	NA	Acta Theriologica	The document meets exclusion criteria for waterways
ACTU_WOS_T_5936	WOS	10.1674/0003-0031-176.2.282	2016	Gonzalez-Olimon, G; St Juliana, JR; Sparks, DW	Highway Medians and Roadsides can Support Diverse Small-Mammal Communities		NA	The comparator is inappropriate
WOS_11029	WOS	NA	2011	Gonzalez-Zarate, Adriana; Lucia Montenegro, Olga; Victoria Castano-Mora, Olga	Habitat characterization of the river turtle Podocnemis lewyana in the Prado river, downstream of Hidroprado dam, Tolima, Colombia	NA	Caldasia	Language is not English or French
WOS_11050	WOS	10.1111/j.1523-1739.2010.01602.x	2011	Goodwin, Sarah E.; Shriver, W. Gregory	Effects of Traffic Noise on Occupancy Patterns of Forest Birds		NA	Sampling points are not on verges (exposure)
WOS_11056	WOS	10.1071/WR98091	2000	Goosem, M.	Effects of tropical rainforest roads on small mammals: edge changes in community composition	NA	Wildlife Research	Sites are not in the bioclimatic region
WOS_11058	WOS	10.1071/WR99093	2001	Goosem, M.	Effects of tropical rainforest roads on small mammals: inhibition of crossing movements	NA	Wildlife Research	Sites are not in the bioclimatic region
WOS_11057	WOS	10.1071/WR01058	2002	Goosem, M.	Effects of tropical rainforest roads on small mammals: fragmentation, edge effects and traffic disturbance	NA	Wildlife Research	Sites are not in the bioclimatic region
ZR_12946	ZR	NA	2006	Goosem, Miriam; Weston, Nigel; Bushnell, Sally	Effectiveness of rope bridge arboreal overpasses and faunal underpasses in providing connectivity for rainforest fauna.	NA	NA	Sites are not in the bioclimatic region
WOS_11061	WOS	10.1111/j.1365-294X.02421.x	2005	Goossens, B.; Chikhi, L.; Jalil, M. F.; Ancrenaz, M.; Lackman-Ancrenaz, I.; Mohamed, M.; Andau, P.; Bruford, M. W.	Patterns of genetic diversity and migration in increasingly fragmented and declining orang-utan (Pongo pygmaeus) populations from Sabah, Malaysia	NA	Molecular Ecology	Sites are not in the bioclimatic region
ACTU_WOS_F_296	WOS	10.1016/j.scitotenv.2017.09.245	2018	Gorczyca, E; Krzemien, K; Sobucki, M; Jarzyna, K	Can beaver impact promote river renaturalization? The example of the Raba River, southern Poland		NA	The comparator is inappropriate
ACTU_GREY_LITT_167	GREY_LITT_BASE	NA	2016	Gordon, Amanda Mae	Freshwater inflow effects on mobile epifauna and estuarine dependent crustaceans in Rincon Bayou in the Nueces Delta	NA	NA	The document meets previous screening exclusion criteria (Population)
ZR_12961	ZR	NA	1988	Gorski, W.	Birds breeding in the farmland of the Damnica Plateau (NW Poland).	NA	NA	Language is not English or French
WOS_11101	WOS	NA	2014	Gortat, Tomasz; Barkowska, Miloslawa; Gryczynska-Siemiatkowska, Alicja; Pieniazek, Agnieszka; Kozakiewicz, Anna; Kozakiewicz, Michal	THE EFFECTS OF URBANIZATION - SMALL MAMMAL COMMUNITIES IN A GRADIENT OF HUMAN PRESSURE IN WARSAW CITY, POLAND	NA	Polish Journal of Ecology	The document meets previous screening exclusion criteria (Exposure)
ZR_12963	ZR	10.2307/2403609	1988	Gosling, L. M.; Baker, S. J.; Clarke, C. N.	An attempt to remove coypus (Myocastor coypus) from a wetland habitat in East Anglia.		NA	The comparator is inappropriate
ZR_12965	ZR	NA	2007	Gosper, D. G.	A survey of diurnal raptors in the Richmond River district, New South Wales, 1996-99.	NA	NA	Pdf cannot be obtained
WOS_11135	WOS	10.1139/Z11-070	2011	Gould, N. P.; Andelt, W. F.	Reproduction and denning by urban and rural San Clemente Island foxes (Urocyon littoralis clementae)		NA	Sampling points are not on verges (exposure)
WOS_11142	WOS	NA	2004	Goumghar, M. D.; Vignoles, P.; Rondelaud, D.; Dreyfuss, G.; Benlemlih, M.	Relationships between the amphibious behaviour of the snail Galba truncatula (Mollusca Gastropoda : Lymnaeidae), altitude, and the type of its habitats in central Morocco	NA	Revue De Medecine Veterinaire	The document meets exclusion criteria for waterways
ACTU_WOS_F_1673	WOS	NA	2017	Goutte, S; Sah, HA; Grafe, TU	Environmental correlates of species richness and composition of riparian anuran communities in rainforests of north-western Borneo: a metacommunity perspective	NA	NA	Pdf cannot be obtained
ACTU_GREY_LITT_38	GREY_LITT_ICOET2017	NA	2017	Grace, Molly	The Behavior of Humans and Wildlife with Respect to Roads: Insights for Mitigation and Management	NA	NA	The document meets previous screening exclusion criteria (Exposure)
ACTU_WOS_T_7094	WOS	10.1098/rsbl.2016.0113	2016	Grade, AM; Sieving, KE	When the birds go unheard: highway noise disrupts information transfer between bird species	NA	NA	The document meets previous screening exclusion criteria (Outcome)
ZR_12985	ZR	NA	2006	Graitson, Eric	Distribution and ecology of reptiles on the rail network in Wallonia.	NA	NA	There is no comparator
ZR_3309	ZR	NA	2010	Gramentz, Dieter	On the choice of resting place of Varanus salvator (Laurenti, 1768) along a river bank in Sri Lanka.	NA	NA	Pdf cannot be obtained
WOS_11202	WOS	10.2307/3802653	1999	Granfors, D. A.; Flake, L. D.	Wood duck brood movements and habitat use on prairie rivers in South Dakota	NA	Journal of Wildlife Management	Sites are not in the bioclimatic region
ZR_3315	ZR	NA	1986	Grant, C. V.	Wildlife distribution and abundance on the Utah Oil Shale Tracts 1975-1984.	NA	NA	Sites are not in the bioclimatic region
WOS_11237	WOS	10.2307/2426510	1993	GRAY, LJ	RESPONSE OF INSECTIVOROUS BIRDS TO EMERGING AQUATIC INSECTS IN RIPARIAN HABITATS OF A TALLGRASS PRAIRIE STREAM	NA	American Midland Naturalist	The document does not dealt with our 6 specific questions
WOS_11250	WOS	10.1016/S0169-2046(02)00195-0	2003	Green, D. A.; Baker, M. G.	Urbanization impacts on habitat and bird communities in a Sonoran desert ecosystem	NA	Landscape and Urban Planning	Sites are not in the bioclimatic region
WOS_11264	WOS	10.1016/j.foreco.2008.01.064	2008	Greenberg, Cathryn H.; Waldrop, Thomas A.	Short-term response of reptiles and amphibians to prescribed fire and mechanical fuel reduction in a southern Appalachian upland hardwood forest	NA	Forest Ecology and Management	The document meets previous screening exclusion criteria (Exposure)
WOS_11270	WOS	10.1111/j.1365-2427.2008.02047.x	2008	Greene, Brian T.; Lowe, Winsor H.; Likens, Gene E.	Forest succession and prey availability influence the strength and scale of terrestrial-aquatic linkages in a headwater salamander system	NA	Freshwater Biology	Sites are not in the bioclimatic region
WOS_11282	WOS	10.1046/j.1365-2907.2002.00099.x	2002	Greenwood, A.; Churchfield, S.; Hickey, C.	Geographical distribution and habitat occurrence of the Water Shrew (Neomys fodiens) in the Weald of South-East England	NA	Mammal Review	The document meets exclusion criteria for waterways
ACTU_WOS_T_3482	WOS	10.1111/btp.12406	2017	Gregory, T; Carrasco-Rueda, F; Deichmann, J; Kolowski, J; Alonso, A	Primate response to natural gas pipeline construction in the Peruvian Amazon	NA	NA	Sites are not in the bioclimatic region
ACTU_WOS_T_90	WOS	NA	2018	Griffin, E; Desmond, M; Vanleeuwen, D	JUVENILE BURROWING OWL NIGHTTIME SPACE-USE IN SOUTHERN NEW MEXICO	NA	NA	Sites are not in the bioclimatic region
EM_227	GREY_LITT_email_request	NA	2012	Grignon, Cécile; Ortega, Nathalie	La flore et la faune sur les talus ferroviaires du grand ouest parisien (ligne L du Transilien)	NA	NA	The type of document is not appropriate
ACTU_WOS_T_6061	WOS	10.1016/j.scitotenv.2016.05.074	2016	Grilo, C; Del Cerro, I; Centeno-Cuadros, A; Ramiro, V; Roman, J; Molina-Vacas, G; Fernandez-Aguilar, X; Rodriguez, J; Porto-Peter, F; Fonseca, C; Revilla, E; Godoy, JA	Heterogeneous road networks have no apparent effect on the genetic structure of small mammal populations	NA	NA	The comparator is inappropriate
ACTU_WOS_T_1406	WOS	10.1016/j.landurbplan.2017.09.014	2018	Grilo, C; Molina-Vacas, G; Fernandez-Aguilar, X; Rodriguez-Ruiz, J; Ramiro, V; Porto-Peter, F; Ascensao, F; Roman, J; Revilla, E	Species-specific movement traits and specialization determine the spatial responses of small mammals towards roads	NA	NA	The document meets previous screening exclusion criteria (Outcome)
WOS_11377	WOS	10.1007/s10344-010-0478-6	2011	Grilo, Clara; Ascensao, Fernando; Santos-Reis, Margarida; Bissonette, John A.	Do well-connected landscapes promote road-related mortality?	NA	European Journal of Wildlife Research	The comparator is inappropriate
WOS_11378	WOS	10.1007/s10531-008-9374-8	2008	Grilo, Clara; Bissonette, John A.; Santos-Reis, Margarida	Response of carnivores to existing highway culverts and underpasses: implications for road planning and mitigation	NA	Biodiversity and Conservation	The document meets previous screening exclusion criteria (Outcome)
WOS_11379	WOS	10.1016/j.biocon.2008.10.026	2009	Grilo, Clara; Bissonette, John A.; Santos-Reis, Margarida	Spatial-temporal patterns in Mediterranean carnivore road casualties: Consequences for mitigation	NA	Biological Conservation	The comparator is inappropriate
WOS_11380	WOS	10.1371/journal.pone.0043811	2012	Grilo, Clara; Sousa, Joana; Ascensao, Fernando; Matos, Hugo; Leitao, Ines; Pinheiro, Paula; Costa, Monica; Bernardo, Joao; Reto, Dyana; Lourenco, Rui; Santos-Reis, Margarida; Revilla, Eloy	Individual Spatial Responses towards Roads: Implications for Mortality Risk	NA	Plos One	The document does not dealt with our 6 specific questions
WOS_11383	WOS	10.2307/3802552	1998	Grindal, S. D.; Brigham, R. M.	Short-term effects of small-scale habitat disturbance on activity by insectivorous bats	NA	Journal of Wildlife Management	Sites are not in the bioclimatic region
WOS_11384	WOS	10.1139/cjz-77-6-972	1999	Grindal, S. D.; Morissette, J. L.; Brigham, R. M.	Concentration of bat activity in riparian habitats over an elevational gradient	NA	Canadian Journal of Zoology-Revue Canadienne De Zoologie	Sites are not in the bioclimatic region
ZR_3382	ZR	NA	1999	Grindal, Scott D.	Habitat use by bats, Myotis spp., in western Newfoundland.	NA	NA	Pdf cannot be obtained
WOS_11392	WOS	10.1111/j.1526-100X.2007.00342.x	2009	Griscom, Heather P.; Griscom, Bronson W.; Ashton, Mark S.	Forest Regeneration from Pasture in the Dry Tropics of Panama: Effects of Cattle, Exotic Grass, and Forested Riparia	NA	Restoration Ecology	Sites are not in the bioclimatic region
WOS_11393	WOS	10.1111/j.1744-729.2006.00242.x	2007	Griscom, Heather P.; Kalko, Elisabeth K. V.; Ashton, Mark S.	Frugivory by small vertebrates within a deforested, dry tropical region of Central America	NA	Biotropica	Sites are not in the bioclimatic region
WOS_11394	WOS	10.1002/jwmg.716	2014	Grisham, Blake A.; Borsdorf, Philip K.; Boal, Clint W.; Boydston, Kathy K.	Nesting ecology and nest survival of lesser prairie-chickens on the Southern High Plains of Texas	NA	Journal of Wildlife Management	Sites are not in the bioclimatic region
ZR_13044	ZR	NA	2013	Grisvard, Pierre	The asp viper Vipera aspis (Linnaeus 1758) (Serpentes: Viperidae) in Lorraine.	NA	NA	The comparator is inappropriate
WOS_11423	WOS	10.1046/j.1523-1739.2002.00501.x	2002	Groom, J. D.; Grubb, T. C.	Bird species associated with riparian woodland in fragmented, temperate-deciduous forest	NA	Conservation Biology	The document meets exclusion criteria for waterways
ZR_3401	ZR	NA	2002	Groppali, Riccardo	[Avifauna and artificial water bodies: the navigable canal of Cremona.]	NA	NA	Language is not English or French
ZR_3403	ZR	NA	2005	Groppali, Riccardo	[Avifauna and waters of the Po Plain.]	NA	NA	Language is not English or French
WOS_11433	WOS	NA	2009	Grosman, Paul D.; Jaeger, Jochen A. G.; Biron, Pascale M.; Dussault, Christian; Ouellet, Jean-Pierre	Reducing Moose-Vehicle Collisions through Salt Pool Removal and Displacement: an Agent-Based Modeling Approach	NA	Ecology and Society	Sites are not in the bioclimatic region
WOS_11434	WOS	10.1016/j.ecolmodel.2011.01.022	2011	Grosman, Paul D.; Jaeger, Jochen A. G.; Biron, Pascale M.; Dussault, Christian; Ouellet, Jean-Pierre	Trade-off between road avoidance and attraction by roadside salt pools in moose: An agent-based model to assess measures for reducing moose-vehicle collisions	NA	Ecological Modelling	Sites are not in the bioclimatic region
ACTU_ZR_T_717	ZR	NA	2016	Gruenewald, Claudia; Schleuning, Matthias; Boehning-Gaese, Katrin	Biodiversity, scenery and infrastructure: Factors driving wildlife tourism in an African savannah national park.	NA	NA	Sites are not in the bioclimatic region
ZR_13079	ZR	NA	2012	Gubbi, Sanjay; Poornesha, H. C.; Madhusudan, M. D.	Impact of vehicular traffic on the use of highway edges by large mammals in a South Indian wildlife reserve.	NA	NA	Sites are not in the bioclimatic region
ZR_13089	ZR	NA	2013	Guglielmi, Roberto	Use of roadsides by Buzzard Buteo buteo in an area of eastern Veneto region.	NA	NA	Pdf cannot be obtained
WOS_11547	WOS	10.1515/mamm.1998.62.1.23	1998	Guichon, M. L.; Cassini, M. H.	Role of diet selection in the use of habitat by pampas cavies Cavia aperea pamparum (Mammalia, Rodentia)	NA	Mammalia	The comparator is inappropriate
WOS_11546	WOS	10.2307/3802803	1999	Guichon, M. L.; Cassini, M. H.	Local determinants of coypu distribution along the Lujan River, eastcentral Argentina	NA	Journal of Wildlife Management	The comparator is inappropriate
WOS_11549	WOS	10.1371/journal.pone.0028212	2011	Guil, Francisco; Fernandez-Olalla, Mariana; Moreno-Opo, Ruben; Mosqueda, Ignacio; Elena Gomez, Maria; Aranda, Antonio; Arredondo, Angel; Guzman, Jose; Oria, Javier; Mariano Gonzalez, Luis; Margalida, Antoni	Minimising Mortality in Endangered Raptors Due to Power Lines: The Importance of Spatial Aggregation to Optimize the Application of Mitigation Measures	NA	Plos One	The document meets previous screening exclusion criteria (Exposure)
ZR_3446	ZR	NA	2014	Guimaraes, L. C.; Rodrigues, F. H. G.; Scotti, M. R.	Strategies for herbivory mitigation by capybaras Hydrochoerus hydrochaeris in a riparian forest under restoration in the Sao Francisco river basin Brazil.	NA	NA	Sites are not in the bioclimatic region
ZR_13106	ZR	NA	2013	Gumprecht, Andreas; van Issem, Peter	On the distribution of the Indo-malayan Mountain Pit Viper, Ovophis convictus (STOLICZKA, 1870), with new records from West-Malaysia and Thailand.	NA	NA	Pdf cannot be obtained
WOS_11606	WOS	10.1016/j.jenvman.2010.11.027	2011	Gunson, Karl E.; Mountrakis, Giorgos; Quackenbush, Lindi J.	Spatial wildlife-vehicle collision models: A review of current work and its application to transportation mitigation projects	NA	Journal of Environmental Management	The document is a review
ZR_13121	ZR	NA	2012	Gupta, Rohtash Chand; Kaushik, Tirshem Kumar	An Account on the Habitats and Threats Vis-A-Vis Indian Spotted Eagle in Kurukshetra Environs in Haryana (India).	NA	NA	Sites are not in the bioclimatic region
WOS_11668	WOS	10.1007/s00442-010-1883-y	2011	Gurarie, Eliezer; Suutarinen, Johanna; Kojola, Ilpo; Ovaskainen, Otso	Summer movements, predation and habitat use of wolves in human modified boreal forests	NA	Oecologia	Sites are not in the bioclimatic region
WOS_11709	WOS	10.1007/s10641-014-0250-y	2014	Gustafsson, Par; Greenberg, Larry A.; Bergman, Eva	Woody debris and terrestrial invertebrates - effects on prey resources for brown trout (Salmo trutta) in a boreal stream	NA	Environmental Biology of Fishes	Sites are not in the bioclimatic region
ZR_3470	ZR	10.2307/1368643	1987	Gutzwiller, K. J.; Anderson, S. H.	Multiscale associations between cavity-nesting birds and features of Wyoming streamside woodlands.	NA	NA	Sites are not in the bioclimatic region
WOS_11733	WOS	10.1071/WR14038	2014	Guzy, Jacquelyn C.; Price, Steven J.; Dorcas, Michael E.	Using multiple methods to assess detection probabilities of riparian-zone anurans: implications for monitoring	NA	Wildlife Research	The comparator is inappropriate
ACTU_WOS_F_326	WOS	10.1002/ece3.3750	2018	Guzy, JC; Eskew, EA; Halstead, BJ; Price, SJ	Influence of damming on anuran species richness in riparian areas: A test of the serial discontinuity concept	NA	NA	Sampling points are not on verges (exposure)
ZR_3475	ZR	NA	2014	Guzzi, Anderson; Favretto, Mario Arthur	Avifauna composition in a forest remnant along the Chapecozinho river, southern Brazil.	NA	NA	Language is not English or French
ZR_3481	ZR	NA	2014	Haan, Damon M.; Halbrook, Richard S.	Resting-Site Selection of American Minks in East-Central New York.	NA	NA	Sites are not in the bioclimatic region
ACTU_ZR_F_750	ZR	NA	2016	Habel, Jan Christian; Teucher, Mike; Roedder, Dennis; Bleicher, Marie-Therese; Dieckow, Claudia; Wiese, Anja; Fischer, Christina	Kenyan endemic bird species at home in novel ecosystem.	NA	NA	Sites are not in the bioclimatic region
ACTU_WOS_F_3326	WOS	10.1007/s10531-015-0998-1	2015	Habel, JC; Teucher, M; Pschonny, S; Rost, S; Fischer, C	Beyond prime areas of nature protection in East Africa: conservation ecology of a narrowly distributed Kenyan endemic bird species	NA	NA	Sites are not in the bioclimatic region
WOS_11763	WOS	10.1111/j.1365-2664.2006.01234.x	2007	Habib, Lucas; Bayne, Erin M.; Boutin, Stan	Chronic industrial noise affects pairing success and age structure of ovenbirds Seiurus aurocapilla	NA	Journal of Applied Ecology	Sites are not in the bioclimatic region
ZR_3499	ZR	NA	1993	Hafner, Christine L.; Brittingham, Margaret C.	Evaluation of a stream-bank fencing program in Pennsylvania.	NA	NA	The document meets exclusion criteria for waterways
WOS_11805	WOS	10.1139/X06-114	2006	Hagan, John M.; Pealer, Sacha; Whitman, Andrew A.	Do small headwater streams have a riparian zone defined by plant communities?	NA	Canadian Journal of Forest Research-Revue Canadienne De Recherche Forestiere	Sites are not in the bioclimatic region
WOS_11806	WOS	10.2307/3802633	1999	Hagar, J. C.	Influence of riparian buffer width on bird assemblages in Western Oregon	NA	Journal of Wildlife Management	The document meets exclusion criteria for waterways
WOS_11807	WOS	10.1016/j.foreco.2012.08.026	2012	Hagar, Joan C.; Li, Judith; Sobota, Janel; Jenkins, Stephanie	Arthropod prey for riparian associated birds in headwater forests of the Oregon Coast Range	NA	Forest Ecology and Management	The document meets exclusion criteria for waterways
WOS_11810	WOS	10.1016/j.jaridenv.2012.03.007	2012	Hagen, E. M.; Sabo, J. L.	Influence of river drying and insect availability on bat activity along the San Pedro River, Arizona (USA)	NA	Journal of Arid Environments	Sites are not in the bioclimatic region
WOS_11812	WOS	10.1007/s00442-011-1913-4	2011	Hagen, Elizabeth M.; Sabo, John L.	A landscape perspective on bat foraging ecology along rivers: does channel confinement and insect availability influence the response of bats to aquatic resources in riverine landscapes?	NA	Oecologia	The comparator is inappropriate
WOS_11811	WOS	10.1016/j.jaridenv.2013.11.016	2014	Hagen, Elizabeth M.; Sabo, John L.	Temporal variability in insectivorous bat activity along two desert streams with contrasting patterns of prey availability	NA	Journal of Arid Environments	Sites are not in the bioclimatic region
WOS_11823	WOS	10.1080/02827580410019427	2004	Hagvar, S.; Nygaard, P.; Baekken, B. T.	Retention of forest strips for bird-life adjacent to water and bogs in Norway: Effect of different widths and habitat variables	NA	Scandinavian Journal of Forest Research	Sites are not in the bioclimatic region
WOS_11860	WOS	10.2478/s11756-013-0296-x	2014	Hajzlerova, Lenka; Reif, Jiri	Bird species richness and abundance in riparian vegetation invaded by exotic Reynoutria spp.	NA	Biologia	Sites are not in the bioclimatic region
ACTU_WOS_F_3970	WOS	10.1111/rec.12158	2015	Hale, R; Reich, P; Johnson, M; Hansen, BD; Lake, PS; Thomson, JR; Mac Nally, R	Bird responses to riparian management of degraded lowland streams in southeastern Australia	NA	NA	The document meets exclusion criteria for waterways
WOS_11874	WOS	10.1111/j.1365-2664.2010.01914.x	2011	Halfwerk, Wouter; Holleman, Leonard J. M.; Lessells, C.; Slabbekoorn, Hans	Negative impact of traffic noise on avian reproductive success	NA	Journal of Applied Ecology	Sampling points are not on verges (exposure)
ACTU_ZR_T_331	ZR	NA	2017	Hall, Emily M.; Brady, Steven P.; Mattheus, Nichole M.; Earley, Ryan L.; Diamond, Molly; Crespi, Erica J.	Physiological consequences of exposure to salinized roadside ponds on wood frog larvae and adults.	NA	NA	Sites are not in the bioclimatic region
ZR_3531	ZR	10.1016/0006-3207(95)00072-0	1996	Halliwell, E. C.; Macdonald, D. W.	American mink Mustela vison in the Upper Thames catchment: relationship with selected prey species and den availability.	NA	NA	The comparator is inappropriate
WOS_11921	WOS	NA	2011	Hallworth, Michael T.; Reitsma, Leonard R.; Parent, Kyle	HABITAT USE OF THE LOUISIANA WATERTHRUSH DURING THE NON-BREEDING SEASON	NA	Wilson Journal of Ornithology	Sites are not in the bioclimatic region
ACTU_WOS_F_3548	WOS	NA	2015	Halstead, BJ; Skalos, SM; Wylie, GD; Casazza, ML	TERRESTRIAL ECOLOGY OF SEMI-AQUATIC GIANT GARTERSNAKES (THAMNOPHIS GIGAS)	NA	NA	Results are in an unexploitable format
ACTU_WOS_F_3606	WOS	10.1016/j.jaridenv.2015.03.007	2015	Hamilton, BT; Roeder, BL; Hatch, KA; Eggett, DL; Tingey, D	Why is small mammal diversity higher in riparian areas than in uplands?	NA	NA	Sites are not in the bioclimatic region
WOS_11955	WOS	10.5751/ACE-00458-060107	2011	Hamilton, Laura E.; Dale, Brenda C.; Paszkowski, Cynthia A.	Effects of Disturbance Associated with Natural Gas Extraction on the Occurrence of Three Grassland Songbirds	NA	Avian Conservation and Ecology	Sites are not in the bioclimatic region
ZR_3546	ZR	NA	2013	Hammer, Tamas; Liker, Andras; Szentirmai, Istvan	Habitat preference of Common Sandpipers (Actitis hypoleucos) along the River Raba, Hungary.	NA	NA	The comparator is inappropriate
ZR_13185	ZR	NA	1998	Hammershoj, Mette; Jensen, Thomas Secher	Road verges and small mammals.	NA	NA	Pdf cannot be obtained
ACTU_WOS_T_2456	WOS	10.1650/CONDOR-17-67.1	2017	Handel, CM; Sauer, JR	Combined analysis of roadside and off-road breeding bird survey data to assess population change in Alaska	NA	NA	Sites are not in the bioclimatic region
WOS_12018	WOS	10.1676/08-067.1	2009	Handel, Colleen M.; Swanson, Shelli A.; Nigro, Debora A.; Matsuoka, Steven M.	ESTIMATION OF AVIAN POPULATION SIZES AND SPECIES RICHNESS ACROSS A BOREAL LANDSCAPE IN ALASKA	NA	Wilson Journal of Ornithology	Sites are not in the bioclimatic region
WOS_12067	WOS	10.1016/S0378-1127(02)00040-3	2003	Hanowski, J.; Danz, N.; Lind, J.; Niemi, G.	Breeding bird response to riparian forest harvest and harvest equipment	NA	Forest Ecology and Management	Sites are not in the bioclimatic region
WOS_12068	WOS	10.2193/0022-541X(2005)069[0689:BBRTVA]2.0.CO;2	2005	Hanowski, J.; Danz, N.; Lind, J.; Niemi, G.	Breeding bird response to varying amounts of basal area retention in riparian buffers	NA	Journal of Wildlife Management	Sites are not in the bioclimatic region
WOS_12069	WOS	10.2307/2426439	1993	HANOWSKI, JM; BLAKE, JG; NIEMI, GJ; COLLINS, PT	EFFECTS OF EXTREMELY LOW-FREQUENCY ELECTROMAGNETIC-FIELDS ON BREEDING AND MIGRATING BIRDS	NA	American Midland Naturalist	Sites are not in the bioclimatic region
WOS_12070	WOS	10.1016/j.foreco.2007.01.006	2007	Hanowski, JoAnn; Danz, Nick; Lind, Jim	Breeding bird response to riparian forest management: 9 years post-harvest	NA	Forest Ecology and Management	Sites are not in the bioclimatic region
WOS_12074	WOS	10.1002/rra.1526	2012	Hansen, C. P.; Renken, R. B.; Millspaugh, J. J.	AMPHIBIAN OCCUPANCY IN FLOOD-CREATED AND EXISTING WETLANDS OF THE LOWER MISSOURI RIVER ALLUVIAL VALLEY	NA	River Research and Applications	The comparator is inappropriate
ACTU_WOS_T_6094	WOS	NA	2016	Hansen, EP; Stewart, AC; Frey, SN	Influence of transmission line construction on winter sage-grouse habitat use in Southern Utah	NA	NA	Sites are not in the bioclimatic region
ACTU_GREY_LITT_384	GREY_LITT_GoogleScholar	NA	2016	Hansen, Erica P.; Stewart, A.; Frey, S. Nicole	Influence of transmission line construction on winter sage-grouse habitat use in southern Utah	NA	Human–Wildlife Interactions	Results are in an unexploitable format
WOS_12085	WOS	NA	1995	HANSEN, RW; FLAKE, LD	ECOLOGICAL RELATIONSHIPS BETWEEN NESTING SWAINSONS AND RED-TAILED HAWKS	NA	Journal of Raptor Research	Sites are not in the bioclimatic region
ACTU_WOS_T_10608	WOS	10.1002/jwmg.865	2015	Hansen, SJK; Frair, JL; Underwood, HB; Gibbs, JP	Pairing Call-Response Surveys and Distance Sampling for a Mammalian Carnivore	NA	NA	Sites are not in the bioclimatic region
WOS_12090	WOS	10.1016/0304-3800(90)90031-B	1990	HANSON, JS; MALANSON, GP; ARMSTRONG, MP	LANDSCAPE FRAGMENTATION AND DISPERSAL IN A MODEL OF RIPARIAN FOREST DYNAMICS	NA	Ecological Modelling	The study type is inappropriate (no data, simulation, recommendation)
WOS_12136	WOS	10.1073/pnas.95.25.14843	1998	Harding, J. S.; Benfield, E. F.; Bolstad, P. V.; Helfman, G. S.; Jones, E. B. D.	Stream biodiversity: The ghost of land use past	NA	Proceedings of the National Academy of Sciences of the United States of America	The document is a review
WOS_12184	WOS	NA	2000	Harness, R. E.	Effectively retrofitting powerlines to reduce raptor mortality	NA	NA	Sites are not in the bioclimatic region
WOS_12187	WOS	NA	2008	Harness, Richard; Gombobaatar, Sundev; Yosef, Reuven	Mongolian Distribution Power Lines and Raptor Electrocutions	NA	NA	Sites are not in the bioclimatic region
ZR_3615	ZR	NA	2004	Harris, Bethany R.; Yorks, Derek T.; Bohnert, Catherine A.; Parmerlee, John S. Jr; Powell, Robert	Population densities and structural habitats in lowland populations of Anolis lizards on Grenada.	NA	NA	Sites are not in the bioclimatic region
WOS_12226	WOS	10.1642/0004-8038(2001)118[0544:TMOBTB]2.0.CO;2	2001	Harris, R. J.; Reed, J. M.	Territorial movements of Black-throated Blue Warblers in a landscape fragmented by forestry	NA	Auk	Sites are not in the bioclimatic region
ACTU_WOS_T_1353	WOS	10.1007/s10531-017-1427-4	2018	Harrison, AL; Petkov, N; Mitev, D; Popgeorgiev, G; Gove, B; Hilton, GM	Scale-dependent habitat selection by wintering geese: implications for landscape management	NA	NA	The comparator is inappropriate
ZR_3618	ZR	10.2307/3801327	1989	Harrison, D. J.; Bissonette, J. A.; Sherburne, J. A.	Spatial relationships between coyotes and red foxes in eastern Maine.	NA	NA	Sites are not in the bioclimatic region
WOS_12232	WOS	10.1029/2009WR008926	2011	Harrison, L. R.; Legleiter, C. J.; Wydzga, M. A.; Dunne, T.	Channel dynamics and habitat development in a meandering, gravel bed river	NA	Water Resources Research	The document meets previous screening exclusion criteria (Outcome)
WOS_12235	WOS	10.1016/j.agee.2012.09.004	2012	Harrison, Nancy; Whitehouse, Mick	Drivers of songbird productivity at a restored gravel pit: Influence of seasonal flooding and rainfall patterns and implications for habitat management	NA	Agriculture Ecosystems & Environment	Sampling points are not on verges (exposure)
ZR_3633	ZR	NA	2005	Hartwig, Silke	An analysis of the kingfishers (Alcedo atthis) nesting habitat in the Upper Elbe Valley, east Erzgebirge region. A survey of known nest sites in the period 1990-2003.	NA	NA	Pdf cannot be obtained
ACTU_WOS_T_10230	WOS	10.1139/cjz-2015-0064	2015	Hasler, CT; Robinson, K; Stow, N; Taylor, SR	Population size and spatial ecology of Blanding's Turtle (Emydoidea blandingii) in South March Highlands, Ottawa, Ontario, Canada	NA	NA	Sites are not in the bioclimatic region
ZR_13296	ZR	NA	2006	Hauri, Rolf	[The crag martin Ptyonoprogne rupestris breeding in the city of Bern.]	NA	NA	Pdf cannot be obtained
ZR_3662	ZR	NA	2010	Havelka, Peter	[New findings on the foraging of the kingfisher (Alcedo atthis).]	NA	NA	Language is not English or French
ZR_13301	ZR	NA	1987	Havlin, J.	Motorways and birds.	NA	NA	Pdf cannot be obtained
WOS_12378	WOS	10.1016/j.foreco.2012.02.015	2012	Hawkes, Virgil C.; Gregory, Patrick T.	Temporal changes in the relative abundance of amphibians relative to riparian buffer width in western Washington, USA	NA	Forest Ecology and Management	Results are in an unexploitable format
ZR_13305	ZR	NA	2008	Hawkeswood, Trevor J.; Turner, J. R.	Reptiles and amphibians recorded from a sandstone habitat bounded by Beaumont and Mundowi Roads, Mt. Kuringai, New South Wales, Australia.	NA	NA	The comparator is inappropriate
WOS_12416	WOS	10.1890/ES10-00199.1	2011	Hayward, Lisa S.; Bowles, Ann E.; Ha, James C.; Wasser, Samuel K.	Impacts of acute and long-term vehicle exposure on physiology and reproductive success of the northern spotted owl	NA	Ecosphere	The document meets previous screening exclusion criteria (Exposure)
ACTU_WOS_T_1405	WOS	10.1016/j.landurbplan.2017.09.009	2018	Hegland, SJ; Hamre, LN	Scale-dependent effects of landscape composition and configuration on deer vehicle collisions and their relevance to mitigation and planning options	NA	NA	The document does not dealt with our 6 specific questions
ACTU_WOS_T_10221	WOS	10.1016/j.jnc.2015.05.002	2015	Heinrichs, JA; Bender, DJ; Gummer, DL; Schumaker, NH	Effects of landscape and patch-level attributes on regional population persistence	NA	NA	Sites are not in the bioclimatic region
WOS_12563	WOS	10.1007/s10021-004-0063-5	2006	Helfield, J. M.; Naiman, R. J.	Keystone interactions: Salmon and bear in riparian forests of alaska	NA	Ecosystems	Sites are not in the bioclimatic region
ZR_3732	ZR	NA	2013	Helon, David A.; Dwyer, Chris P.; Witt, Mark D.; Edwards, John W.; Anderson, James T.	Summer movements and activity patterns of river otters in Northeastern Ohio, USA.	NA	NA	Sites are not in the bioclimatic region
WOS_12587	WOS	10.1650/0010-5422(2006)108[842:FINSOS]2.0.CO;2	2006	Heltzel, Jeannie M.; Earnst, Susan L.	Factors influencing nest success of songbirds in aspen and willow riparian areas in the Great Basin	NA	Condor	The document meets exclusion criteria for waterways
ZR_3738	ZR	NA	2013	Henden, John-Andre; Yoccoz, Nigel G.; Ims, Rolf A.; Langeland, Knut	How Spatial Variation in Areal Extent and Configuration of Labile Vegetation States Affect the Riparian Bird Community in Arctic Tundra.	NA	NA	Sites are not in the bioclimatic region
WOS_12621	WOS	NA	2005	Hendricks, Paul; Johnson, Joseph; Lenard, Susan; Currier, Coburn	Use of a bridge for day roosting by the Hoary Bat, Lasiurus cinereus	NA	Canadian Field-Naturalist	Sites are not in the bioclimatic region
ZR_3746	ZR	NA	2007	Heneberg, P.	Sand martin (Riparia riparia) in the Czech Republic at the turn of the millenium.	NA	NA	The document meets exclusion criteria for waterways
ZR_13369	ZR	NA	2009	Henf, Manfred	[Amphibians and reptiles in the area of the Nordbahntrasse.]	NA	NA	Pdf cannot be obtained
WOS_12640	WOS	10.1650/0010-5422(2003)105[0288:RBCSIP]2.0.CO;2	2003	Hennings, L. A.; Edge, W. D.	Riparian bird community structure in Portland, Oregon: Habitat, urbanization, and spatial scale patterns	NA	Condor	The document meets exclusion criteria for waterways
ACTU_ZR_T_511	ZR	NA	2017	Henriques, Mohamed; Lecoq, Miguel; Monteiro, Hamilton; Regalla, Aissa; Granadeiro, Jose P.; Catry, Paulo	Status of birds of prey in Guinea-Bissau: first assessment based on road surveys.	NA	NA	Sites are not in the bioclimatic region
ZR_13380	ZR	NA	1998	Herden, C.; Rassmus, J.; Schweigert, R.	Seasonal migration patterns and roadkills of amphibians. Results of a study at a road near Rumohr (Schleswig-Holstein).	NA	NA	Pdf cannot be obtained
ZR_3775	ZR	NA	1997	Hermant, D.; Frochot, B.	Breeding habitats and spring densities of some Turdinae and Columbidae species in Cote-d'Or (France).	NA	NA	Pdf cannot be obtained
ACTU_WOS_T_9508	WOS	10.1016/j.biocon.2015.07.040	2015	Hernandez-Pliego, J; de Lucas, M; Munoz, AR; Ferrer, M	Effects of wind farms on Montagu's harrier (Circus pygargus) in southern Spain	NA	NA	The comparator is inappropriate
ZR_13388	ZR	NA	2009	Herr, Jan; Schley, Laurent; Roper, Timothy J.	Stone martens (Martes foina) and cars: investigation of a common human-wildlife conflict.	NA	NA	The document meets previous screening exclusion criteria (Exposure)
WOS_12728	WOS	10.1007/s11252-011-0158-7	2011	Herrera-Montes, Maria Isabel; Aide, T. Mitchell	Impacts of traffic noise on anuran and bird communities	NA	Urban Ecosystems	Sites are not in the bioclimatic region
ZR_13394	ZR	10.1016/0006-3207(85)90107-7	1985	Herrington, R. E.; Larsen, J. H.	Current status, habitat requirements and management of the Larch Mountain salamander Plethodon larselli Burns.	NA	NA	The comparator is inappropriate
ZR_13410	ZR	NA	2001	Hewish, Dean R.; Hewish, Marilyn J.	Southern boobooks and tawny frogmouths on the Werribee Plains.	NA	NA	Pdf cannot be obtained
ACTU_WOS_T_4782	WOS	10.1071/WR16184	2017	Hibbitts, TJ; Fitzgerald, LA; Walkup, DK; Ryberg, WA	Why didn't the lizard cross the road? Dunes sagebrush lizards exhibit road-avoidance behaviour	NA	NA	Sites are not in the bioclimatic region
WOS_12798	WOS	10.1016/j.jembe.2010.01.010	2010	Hickford, Michael J. H.; Cagnon, Mathilde; Schiel, David R.	Predation, vegetation and habitat-specific survival of terrestrial eggs of a diadromous fish, Galaxias maculatus (Jenyns, 1842)	NA	Journal of Experimental Marine Biology and Ecology	The comparator is inappropriate
WOS_12802	WOS	10.1007/s00442-010-1834-7	2011	Hickford, Michael J. H.; Schiel, David R.	Population sinks resulting from degraded habitats of an obligate life-history pathway	NA	Oecologia	The document meets previous screening exclusion criteria (Population)
WOS_12833	WOS	10.1159/000339805	2012	Hilario, Renato R.; Rodrigues, Flavio H. G.; Chiarello, Adriano G.; Mourthe, Italo	Can Roads Be Used as Transects for Primate Population Surveys?	NA	Folia Primatologica	Sites are not in the bioclimatic region
ZR_13425	ZR	10.1071/MU98031	1998	Hill, F. A. Richard; Lill, Alan	Diet and roost site characteristics of the Christmas Island hawk-owl Ninox natalis.	NA	NA	Sites are not in the bioclimatic region
WOS_12875	WOS	10.1111/j.1523-1739.2004.00225.x	2004	Hilty, J. A.; Merenlender, A. M.	Use of riparian corridors and vineyards by mammalian predators in northern California	NA	Conservation Biology	The document meets exclusion criteria for waterways
ZR_13432	ZR	NA	1991	Hines, T. D.; Case, R. M.	Diet, home range, movements, and activity periods of swift fox in Nebraska.	NA	NA	Pdf cannot be obtained
WOS_12893	WOS	10.1016/j.ecoleng.2012.12.082	2013	Hinojosa-Huerta, Osvel; Nagler, Pamela L.; Carrillo-Guererro, Yamilett K.; Glenn, Edward P.	Effects of drought on birds and riparian vegetation in the Colorado River Delta, Mexico	NA	Ecological Engineering	Sites are not in the bioclimatic region
ACTU_WOS_F_1831	WOS	10.3161/15081109ACC2016.18.2.007	2016	Hintze, F; Duro, V; Carvalho, JC; Eira, C; Rodrigues, PC; Vingada, J	Influence of reservoirs created by small dams on the activity of bats	NA	NA	The document meets exclusion criteria for waterways
WOS_12935	WOS	NA	2011	Hladyz, Sally; Abjornsson, Kajsa; Chauvet, Eric; Dobson, Michael; Elosegi, Arturo; Ferreira, Veronica; Fleituch, Tadeusz; Gessner, Mark O.; Giller, Paul S.; Gulis, Vladislav; Hutton, Stephen A.; Lacoursiere, Jean O.; Lamothe, Sylvain; Lecerf, Antoine; Malmqvist, Bjorn; McKie, Brendan G.; Nistorescu, Marius; Preda, Elena; Riipinen, Miira P.; Risnoveanu, Geta; Schindler, Markus; Tiegs, Scott D.; Vo…	Stream Ecosystem Functioning in an Agricultural Landscape: The Importance of Terrestrial-Aquatic Linkages	NA	Advances in Ecological Research, Vol 44	The document is a review
WOS_12967	WOS	10.1071/WR08067	2008	Hobday, Alistair J.; Minstrell, Melinda L.	Distribution and abundance of roadkill on Tasmanian highways: human management options	NA	Wildlife Research	The document meets previous screening exclusion criteria (Outcome)
WOS_12974	WOS	10.1139/F06-110	2006	Hocking, Morgan D.; Reimchen, Thomas E.	Consumption and distribution of salmon (Oncorhynchus spp.) nutrients and energy by terrestrial flies	NA	Canadian Journal of Fisheries and Aquatic Sciences	The document meets previous screening exclusion criteria (Exposure)
WOS_12982	WOS	NA	1996	Hodges, M. F.; Krementz, D. G.	Neotropical migratory breeding bird communities in riparian forests of different widths along the Altamaha River, Georgia	NA	Wilson Bulletin	The comparator is inappropriate
ZR_13473	ZR	NA	2010	Hoenes, Brock D.; Bender, Louis C.	Relative habitat- and browse-use of native desert mule deer and exotic oryx in the greater San Andres Mountains, New Mexico.	NA	NA	Sites are not in the bioclimatic region
WOS_13027	WOS	10.1071/MF09140	2010	Hohausova, Eva; Lavoy, Richard J.; Allen, Micheal S.	Fish dispersal in a seasonal wetland: influence of anthropogenic structures	NA	Marine and Freshwater Research	There is no comparator
WOS_13028	WOS	10.1002/rra.719	2004	Hohensinner, S.; Habersack, H.; Jungwirth, M.; Zauner, G.	Reconstruction of the characteristics of a natural alluvial river-floodplain system and hydromorphological changes following human modifications: The Danube River (1812-1991)	NA	River Research and Applications	The document meets previous screening exclusion criteria (Population)
WOS_13039	WOS	10.1016/j.baae.2010.06.006	2010	Holderegger, Rolf; Di Giulio, Manuela	The genetic effects of roads: A review of empirical evidence	NA	Basic and Applied Ecology	The document is a review
WOS_13046	WOS	10.1071/WR06104	2007	Holland, Greg J.; Bennett, Andrew F.; van der Ree, Rodney	Time-budget and feeding behaviour of the squirrel glider (Petaurus norfolcensis) in remnant linear habitat	NA	Wildlife Research	The document meets previous screening exclusion criteria (Exposure)
WOS_13049	WOS	10.1111/j.1442-9993.2010.02178.x	2011	Holland-Clift, Sarah; O'Dowd, Dennis J.; Mac Nally, Ralph	Impacts of an invasive willow (Salix x rubens) on riparian bird assemblages in south-eastern Australia	NA	Austral Ecology	The comparator is inappropriate
WOS_13059	WOS	10.1007/s10841-007-9076-7	2008	Hollmen, Antti; Valimaki, Panu; Itamies, Juhani; Oksanen, Jari	The value of open power line habitat in conservation of ground beetles (Coleoptera : Carabidae) associated with mires	NA	Journal of Insect Conservation	Sites are not in the bioclimatic region
ACTU_WOS_T_10606	WOS	10.1002/jwmg.877	2015	Holloran, MJ; Fedy, BC; Dahlke, J	Winter Habitat Use of Greater Sage-Grouse Relative to Activity Levels at Natural Gas Well Pads	NA	NA	Sites are not in the bioclimatic region
WOS_13061	WOS	NA	2000	Holloway, G. L.; Barclay, R. M. R.	Importance of prairie riparian zones to bats in southeastern Alberta	NA	Ecoscience	Sites are not in the bioclimatic region
ACTU_WOS_F_1149	WOS	10.3390/f8050141	2017	Holmes, SB; McIlwrick, KA; Kreutzweiser, DP; Venier, LA	Riparian Partial Harvesting and Upland Clear Cutting Alter Bird Communities in a Boreal Mixedwood Forest	NA	NA	Sites are not in the bioclimatic region
ZR_13507	ZR	NA	1993	Holmes, Tamara L.; Knight, Richard L.; Stegall, Libby; Craig, Gerald R.	Responses of wintering grassland raptors to human disturbance.	NA	NA	Sites are not in the bioclimatic region
ZR_13514	ZR	NA	1996	Homan, H. Jeffrey; Linz, George M.; Bleier, William J.; Carlson, Robert M.	Colony-site and nest-site use by common grackles in North Dakota.	NA	NA	Sites are not in the bioclimatic region
ACTU_WOS_F_1839	WOS	10.1007/s11252-015-0437-9	2016	Homayoun, TZ; Blair, RB	Value of park reserves to migrating and breeding landbirds in an urban important bird area	NA	NA	Sites are not in the bioclimatic region
WOS_13113	WOS	NA	2002	Homyack, J. D.; Giuliano, W. M.	Effect of streambank fencing on herpetofauna in pasture stream zones	NA	Wildlife Society Bulletin	The document meets exclusion criteria for waterways
ACTU_WOS_T_7558	WOS	10.1016/j.foreco.2015.11.037	2016	Homyack, JA; O'Bryan, CJ; Thornton, JE; Baldwin, RF	Community occupancy of herpetofauna in roadside ditches in a managed pine landscape	NA	NA	The document meets previous screening exclusion criteria (Exposure)
WOS_13114	WOS	10.1016/j.foreco.2014.08.035	2014	Homyack, Jessica A.; O'Bryan, Christopher J.; Thornton, Jamie E.; Baldwin, Robert F.	Anuran assemblages associated with roadside ditches in a managed pine landscape	NA	Forest Ecology and Management	The document meets previous screening exclusion criteria (Exposure)
ACTU_WOS_F_78	WOS	10.1016/j.ecolind.2018.01.004	2018	Hong, S; Kim, DK; Do, Y; Kim, JY; Kim, YM; Cowan, P; Joo, GJ	Stream health, topography, and land use influences on the distribution of the Eurasian otter Lutra lutra in the Nakdong River basin, South Korea	NA	NA	Results are in an unexploitable format
WOS_13127	WOS	NA	2013	Hong, Shiao-Yu; Sun, Yuan-Hsun; Wu, Hsin-Ju; Chen, Chao-Chieh	Spatial distribution of the Tawny Fish Owl Ketupa flavipes shaped by natural and man-made factors in Taiwan	NA	Forktail	The comparator is inappropriate
WOS_13146	WOS	10.1016/j.foreco.2009.07.052	2009	Hood, Glynnis A.; Bayley, Suzanne E.	A comparison of riparian plant community response to herbivory by beavers (Castor canadensis) and ungulates in Canada's boreal mixed-wood forest	NA	Forest Ecology and Management	Sites are not in the bioclimatic region
WOS_13178	WOS	10.1016/j.envpol.2012.10.002	2013	Hopkins, Gareth R.; French, Susannah S.; Brodie, Edmund D.	Increased frequency and severity of developmental deformities in rough-skinned newt (Taricha granulosa) embryos exposed to road deicing salts (NaCl & MgCl2)	NA	Environmental Pollution	The study type is inappropriate (no data, simulation, recommendation)
WOS_13179	WOS	10.1111/eva.12016	2013	Hopkins, Gareth R.; French, Susannah S.; Brodie, Edmund D.	Potential for local adaptation in response to an anthropogenic agent of selection: effects of road deicing salts on amphibian embryonic survival and development	NA	Evolutionary Applications	The study type is inappropriate (no data, simulation, recommendation)
WOS_13205	WOS	10.1007/s10750-008-9503-0	2008	Horky, Pavel; Slavik, Ondrej; Bartos, Ludek	A telemetry study on the diurnal distribution and activity of adult pikeperch, Sander lucioperca (L.), in a riverine environment	NA	Hydrobiologia	The document meets previous screening exclusion criteria (Population)
ZR_3957	ZR	NA	2005	Horvath, Gyozo; Molnar, Daniel; Csonka, Gergely	Population dynamics and spatial pattern of small mammals in protected forest and reforested area.	NA	NA	Sampling points are not on verges (exposure)
ZR_3958	ZR	NA	2006	Horvath, Gyozo; Schaffer, David; Molnar, Daniel; Pogany, Akos	Population and community studies of small mammals in two types of floodland forest.	NA	NA	Language is not English or French
WOS_13248	WOS	NA	2010	Hoskin, Conrad J.; Goosem, Miriam W.	Road Impacts on Abundance, Call Traits, and Body Size of Rainforest Frogs in Northeast Australia	NA	Ecology and Society	Sites are not in the bioclimatic region
ZR_13553	ZR	NA	1999	Hossain, Lokman; Jaman, M. Firoj; Sarker, Noor Jahan; Sarker, Sohrab Uddin	Food habit and habitats of the common skink, Mabuya carinata Schneider (Squamata: Scincidae).	NA	NA	Pdf cannot be obtained
WOS_13275	WOS	10.1002/ird.515	2010	Hou, Wen-Shang; Chang, Yuan-Hsiou; Wang, Hsiao-Wen; Tan, Yih-Chi	USING THE BEHAVIOR OF SEVEN AMPHIBIAN SPECIES FOR THE DESIGN OF BANKS OF IRRIGATION AND DRAINAGE SYSTEMS IN TAIWAN	NA	Irrigation and Drainage	The study type is inappropriate (no data, simulation, recommendation)
WOS_13288	WOS	10.1080/02705060.2013.774298	2013	Houghton, David C.; Wasson, Jessica L.	Abrupt biological discontinuity in a small Michigan (USA) stream due to historical riparian canopy loss	NA	Journal of Freshwater Ecology	Sites are not in the bioclimatic region
WOS_13289	WOS	10.1139/F03-095	2003	Houlahan, J. E.; Findlay, C. S.	The effects of adjacent land use on wetland amphibian species richness and community composition	NA	Canadian Journal of Fisheries and Aquatic Sciences	Sites are not in the bioclimatic region
ZR_3982	ZR	NA	1994	Houston, Darryl; Shine, Richard	Movements and activity patterns of Arafura filesnakes (Serpentes: Acrochordidae) in tropical Australia.	NA	NA	Sites are not in the bioclimatic region
ACTU_WOS_T_9986	WOS	10.1371/journal.pone.0137021	2015	Hovick, TJ; Dahlgren, DK; Papes, M; Elmore, RD; Pitman, JC	Predicting Greater Prairie-Chicken Lek Site Suitability to Inform Conservation Actions	NA	NA	The document meets previous screening exclusion criteria (Exposure)
ACTU_WOS_T_9992	WOS	10.1117/1.JRS.9.096020	2015	Howard, AM; Nibbelink, N; Bernardes, S; Fragaszy, DM; Maddene, M	Remote sensing and habitat mapping for bearded capuchin monkeys (Sapajus libidinosus): landscapes for the use of stone tools	NA	NA	Sites are not in the bioclimatic region
WOS_13314	WOS	10.1650/CONDOR-13-115-R2.1	2014	Howe, Kristy B.; Coates, Peter S.; Delehanty, David J.	Selection of anthropogenic features and vegetation characteristics by nesting Common Ravens in the sagebrush ecosystem	NA	Condor	Sites are not in the bioclimatic region
WOS_13317	WOS	10.3398/064.070.0111	2010	Howell, Christine A.; Wood, Julian K.; Dettling, Mark D.; Griggs, Kenneth; Otte, Codie C.; Lina, Linette; Gardali, Thomas	LEAST BELL'S VIREO BREEDING RECORDS IN THE CENTRAL VALLEY FOLLOWING DECADES OF EXTIRPATION	NA	Western North American Naturalist	The comparator is inappropriate
ACTU_ZR_F_952	ZR	NA	2016	Howell, Lindsey; Jelden, Katelyn; Racz, Elizabeth; Gardner, Scott L.; Gettinger, Donald	Arthropods infesting small mammals (Insectivora and Rodentia) near Cedar Point Biological Station in southwestern Nebraska.	NA	NA	Sites are not in the bioclimatic region
WOS_13322	WOS	NA	2001	Howell, P. J.	Effects of disturbance and management of forest health on fish and fish habitat in eastern Oregon and Washington	NA	Northwest Science	The document is a review
ACTU_ZR_T_843	ZR	NA	2016	Howell, Paige E.; Koen, Erin L.; Williams, Bronwyn W.; Roloff, Gary J.; Scribner, Kim T.	Contiguity of landscape features pose barriers to gene flow among American marten (Martes americana) genetic clusters in the Upper Peninsula of Michigan.	NA	NA	Sites are not in the bioclimatic region
ZR_3994	ZR	10.1139/z90-204	1990	Howland, J. M.; Vitt, L. J.; Lopez, P. T.	Life on the edge: the ecology and life history of the tropidurine iguanid lizard Uranoscodon superciliosum.	NA	NA	Sites are not in the bioclimatic region
ACTU_WOS_T_2100	WOS	10.1038/s41598-017-12464-7	2017	Hradsky, BA; Robley, A; Alexander, R; Ritchie, EG; York, A; Di Stefano, J	Human-modified habitats facilitate forest-dwelling populations of an invasive predator, Vulpes vulpes	NA	NA	The comparator is inappropriate
ZR_3999	ZR	NA	2010	Hrtan, Ervin	The nesting of the Eurasian eagle-owl (Bubo bubo) in a man-made building.	NA	NA	Sites are not in the bioclimatic region
ZR_13575	ZR	NA	1988	Hsu, M.; Humpert, M. J.	Use of artificial nest cavities along Ohio interstate highways by bluebirds (Sialia sialis) and mice (Peromyscus sp.).	NA	NA	The comparator is inappropriate
WOS_13361	WOS	10.1016/j.foreco.2010.06.028	2010	Hsu, Tina; French, Kris; Major, Richard	Avian assemblages in eucalypt forests, plantations and pastures in northern NSW, Australia	NA	Forest Ecology and Management	The document meets exclusion criteria for waterways
WOS_13365	WOS	10.3724/SP.J.1245.2012.00280	2012	Hu, Dun; Fu, Jinzhong; Zou, Fangdong; Qi, Yin	Impact of the Qinghai-Tibet Railway on Population Genetic Structure of the Toad-Headed Lizard, Phrynocephalus vlangalii	NA	Asian Herpetological Research	Sites are not in the bioclimatic region
ZR_13579	ZR	NA	2010	Hu, Junhua; Jiang, Zhigang; Yang, Daode; Hu, Huijian	Nest-site selection by Purple Swamphen in Haifeng, China.	NA	NA	Sites are not in the bioclimatic region
ZR_13581	ZR	NA	2005	Hu, Zhongjun; Yu, Changqing; Xu, Hongfa; Wang, Yu	Ecological effects of roads on terrestrial animals.	NA	NA	Pdf cannot be obtained
WOS_13423	WOS	10.1016/j.ecoleng.2010.12.001	2011	Huang, Jung-Chen; Mitsch, William J.; Johnson, Dave L.	Estimating biogeochemical and biotic interactions between a stream channel and a created riparian wetland: A medium-scale physical model	NA	Ecological Engineering	Sites are not in the bioclimatic region
ZR_4003	ZR	NA	2009	Huang, Ya-dong; Zhang, Xian-feng; Hu, Hong-xing	Primary survey on summer birds in Yili River Wetland and its vicinity.	NA	NA	Language is not English or French
WOS_13466	WOS	NA	1997	Hubalek, Z.	Trends of bird populations in a managed lowland riverine ecosystem	NA	Folia Zoologica	The comparator is inappropriate
WOS_13465	WOS	NA	1999	Hubalek, Z.	Seasonal changes of bird communities in a managed lowland riverine ecosystem	NA	Folia Zoologica	The comparator is inappropriate
ZR_4009	ZR	NA	2001	Hubalek, Zdenek	Seasonal variation of forest habitat preferences by birds in a lowland riverine ecosystem.	NA	NA	Pdf cannot be obtained
ACTU_WOS_T_7374	WOS	10.1670/13-182	2016	Hubbard, KA; Chalfoun, AD; Gerow, KG	The Relative Influence of Road Characteristics and Habitat on Adjacent Lizard Populations in Arid Shrublands	NA	NA	Sites are not in the bioclimatic region
ZR_13593	ZR	NA	2008	Hudoklin, Andrej	Ecological demands of the lesser grey shrike Lanius minor in its breeding habitat at Sentjernejsko polje (SE Slovenia).	NA	NA	Pdf cannot be obtained
ZR_13595	ZR	NA	2007	Huebschman, J. J.	Distribution, abundance, and habitat associations of Franklin's ground squirrel (Spermophilus franklinii Sabine 1822).	NA	NA	The document is a review
ZR_13599	ZR	NA	2006	Hughes, Ronald S.	Home ranges of the endangered Carolina northern flying squirrel in the Unicoi Mountains of North Carolina.	NA	NA	The comparator is inappropriate
WOS_13551	WOS	10.1007/s00267-010-9521-3	2010	Hughes, Samantha Jane; Santos, Jose; Ferreira, Teresa; Mendes, Ana	Evaluating the Response of Biological Assemblages as Potential Indicators for Restoration Measures in an Intermittent Mediterranean River	NA	Environmental Management	The type of document is not appropriate
WOS_13570	WOS	NA	2010	Hui-xi, Xu; Zheng, Lu; Wan-rong, Xue	Analysis about Land Use Impact from 500 KV Transmission Line Corridors Based on Satellite Remote Sensing	NA	NA	Pdf cannot be obtained (and sites are not in the temperate bioclimatic region)
ACTU_WOS_T_1563	WOS	10.1007/s10344-017-1158-6	2017	Hummel, S; Meyer, L; Hacklander, K; Weber, D	Activity of potential predators of European hare (Lepus europaeus) leverets and ground-nesting birds in wildflower strips	NA	NA	Sampling points are not on verges (exposure)
ZR_4041	ZR	NA	2002	Humple, Diana L.; Geupel, Geoffrey R.	Autumn populations of birds in riparian habitat of California's Central Valley.	NA	NA	The comparator is inappropriate
ACTU_WOS_F_329	WOS	10.1650/CONDOR-17-93.1	2018	Hunt, KL; Fraser, JD; Friedrich, MJ; Karpanty, SM; Catlin, DH	Demographic response of Piping Plovers suggests that engineered habitat restoration is no match for natural riverine processes	NA	NA	Sites are not in the bioclimatic region
WOS_13617	WOS	10.1016/j.biocon.2012.08.035	2013	Hunt, Stephanie D.; Guzy, Jacquelyn C.; Price, Steven J.; Halstead, Brian J.; Eskew, Evan A.; Dorcas, Michael E.	Responses of riparian reptile communities to damming and urbanization	NA	Biological Conservation	Results are in an unexploitable format
ZR_4051	ZR	10.2307/3800938	1988	Hunter, R. E.; Crawford, J. A.; Ambrose, R. E.	Prey selection by peregrine falcons during the nestling stage.	NA	NA	Sites are not in the bioclimatic region
ZR_4053	ZR	10.2307/3801039	1987	Hunter, W. C.; Anderson, B. W.; Ohmart, R. D.	Avian community structure changes in a mature floodplain forest after extensive flooding.	NA	NA	Sites are not in the bioclimatic region
ZR_4065	ZR	NA	1992	Husain, K. Z.; Rahman, M. K.; Haque, M. N.; Sarker, S. U.	Ecology and food habits of roadside birds from Chittagong to Teknaf.	NA	NA	Pdf cannot be obtained
ACTU_ZR_T_1052	ZR	NA	2016	Husby, Magne	Factors affecting road mortality in birds.	NA	NA	Sites are not in the bioclimatic region
WOS_13653	WOS	10.1016/S0006-3207(96)00033-X	1997	Hussain, S. A.; Choudhury, B. C.	Distribution and status of the smooth-coated otter Lutra perspicillata in National Chambal Sanctuary, India	NA	Biological Conservation	Results are in an unexploitable format
WOS_13727	WOS	NA	2013	Ibrahim, Adel A.	The Herpetology of the Suez Canal Zone, Egypt	NA	Vertebrate Zoology	Sites are not in the bioclimatic region
ACTU_WOS_T_402	WOS	10.1007/s10661-018-6573-y	2018	Iglesias-Merchan, C; Horcajada-Sanchez, F; Diaz-Balteiro, L; Escribano-Avila, G; Lara-Romero, C; Virgos, E; Planillo, A; Barja, I	A new large-scale index (AcED) for assessing traffic noise disturbance on wildlife: stress response in a roe deer (Capreolus capreolus) population	NA	NA	The document meets previous screening exclusion criteria (Outcome)
WOS_13761	WOS	10.1186/1756-3305-7-357	2014	Ikeda, Takako; Yoshimura, Masashi; Onoyama, Keiichi; Oku, Yuzaburo; Nonaka, Nariaki; Katakura, Ken	Where to deliver baits for deworming urban red foxes for Echinococcus multilocularis control: new protocol for micro-habitat modeling of fox denning requirements	NA	Parasites & Vectors	Sites are not in the bioclimatic region
WOS_13772	WOS	NA	1995	Ilichev, V. D.; Kamenskii, I. I.; Silaeva, O. L.	Ecological and technogenous factors of noise pollution of natural habitats of birds	NA	Russian Journal of Ecology	Sites are not in the bioclimatic region
ACTU_ZR_T_801	ZR	NA	2016	Imron, Muhammad Ali; Hastuti, Hervina Marda; Satria, Ryan Adi; Ashari, Mas'ud; Rudijanta; Nurvianto, Sandy; Subeno; Pudyatmoko, Satyawan	The Use of Habitat Suitability Index Map for Designing Population Monitoring of Banteng (Bos javanicus) in Alas Purwo National Park-East Java-Indonesia.	NA	NA	Sites are not in the bioclimatic region
WOS_13808	WOS	10.1016/j.biocon.2012.02.008	2012	Ims, Rolf A.; Henden, John-Andre	Collapse of an arctic bird community resulting from ungulate-induced loss of erect shrubs	NA	Biological Conservation	Sites are not in the bioclimatic region
ZR_13662	ZR	NA	2014	Inatomi, Yoshihiro; Uno, Hiroyuki; Ueno, Mayumi	Habitat selection of sika deer during winter in Kushiro Shitsugen National Park.	NA	NA	Language is not English or French
WOS_13827	WOS	NA	2004	Ingelfinger, F.; Anderson, S.	Passerine response to roads associated with natural gas extraction in a sagebrush steppe habitat	NA	Western North American Naturalist	Sites are not in the bioclimatic region
WOS_13828	WOS	NA	1993	INGER, RF; VORIS, HK	A COMPARISON OF AMPHIBIAN COMMUNITIES THROUGH TIME AND FROM PLACE TO PLACE IN BORNEAN FORESTS	NA	Journal of Tropical Ecology	Sites are not in the bioclimatic region
WOS_13835	WOS	10.1672/0277-5212(2002)022[0647:ACIFRW]2.0.CO;2	2002	Inman, R. L.; Prince, H. H.; Hayes, D. B.	Avian communities in forested riparian wetlands of southern Michigan, USA	NA	Wetlands	Sites are not in the bioclimatic region
ZR_13670	ZR	NA	2015	Inselman, Will M.; Datta, Shubham; Jenks, Jonathan A.; Jensen, Kent C.; Grovenburg, Troy W.	Buteo Nesting Ecology: Evaluating Nesting of Swainson's Hawks in the Northern Great Plains.	NA	NA	Sites are not in the bioclimatic region
ACTU_WOS_F_3359	WOS	10.1016/j.foreco.2015.06.009	2015	Irwin, LL; Rock, DF; Rock, SC; Loehle, C; Van Deusen, P	Forest ecosystem restoration: Initial response of spotted owls to partial harvesting	NA	NA	The document meets exclusion criteria for waterways
ZR_4139	ZR	NA	2014	Isaac, Bronwyn; White, John; Ierodiaconou, Daniel; Cooke, Raylene	Simplification of Arboreal Marsupial Assemblages in Response to Increasing Urbanization.	NA	NA	The study type is inappropriate (no data, simulation, recommendation)
WOS_13954	WOS	NA	2001	Iuell, B.	The prevention of unwanted species immigrating to islands on strait crossings	NA	NA	Sites are not in the bioclimatic region
ACTU_WOS_T_7581	WOS	10.5358/hsj.35.1	2016	Iwai, N; Watari, Y; Ishii, HT; Akasaka, M	Are Forest Roads Attractive Hunting Sites for Frogs? A Comparison of On-road and In-forest Prey Biomass and Composition in Amami Island	NA	NA	The comparator is inappropriate
ZR_4161	ZR	NA	2010	Iwamoto, Jiro	Relationship between snowfall and winter diet of northern long-eared owl, Asio otus roosted in urban area.	NA	NA	Pdf cannot be obtained
ZR_4162	ZR	NA	2011	Iwamoto, Jiro	Diet in breeding season of northern long-eared owl, Asio otus in urban area.	NA	NA	Pdf cannot be obtained
WOS_13975	WOS	10.1890/1051-0761(2003)013[0461:IOPRDO]2.0.CO;2	2003	Iwata, T.; Nakano, S.; Inoue, M.	Impacts of past riparian deforestation on stream communities in a tropical rain forest in Borneo	NA	Ecological Applications	Sites are not in the bioclimatic region
WOS_13976	WOS	10.1034/j.1600-0587.2003.03355.x	2003	Iwata, T.; Nakano, S.; Murakami, M.	Stream meanders increase insectivorous bird abundance in riparian deciduous forests	NA	Ecography	Sites are not in the bioclimatic region
WOS_13978	WOS	10.1111/j.1523-1739.2010.01493.x	2010	Iwata, Tomoya; Urabe, Jotaro; Mitsuhashi, Hiromune	Effects of Drainage-Basin Geomorphology on Insectivorous Bird Abundance in Temperate Forests	NA	Conservation Biology	Sites are not in the bioclimatic region
WOS_13999	WOS	10.1078/1616-5047-00103	2003	Jaberg, C.; Blant, J. D.	Spatio-temporal utilisation of roosts by the parti-coloured bat Vespertilio murinus L., 1758 in Switzerland	NA	Mammalian Biology	The document meets previous screening exclusion criteria (Exposure)
ACTU_WOS_F_133	WOS	10.1016/j.biocon.2018.02.012	2018	Jachowski, CMB; Hopkins, WA	Loss of catchment-wide riparian forest cover is associated with reduced recruitment in a long-lived amphibian	NA	NA	The document meets exclusion criteria for waterways
ZR_4176	ZR	NA	2014	Jachowski, David S.; Johnson, Joshua B.; Dobony, Christopher A.; Edwards, John W.; Ford, W. Mark	Space use and resource selection by foraging Indiana bats at the northern edge of their distribution.	NA	NA	Sites are not in the bioclimatic region
ACTU_WOS_T_10423	WOS	10.1007/s10531-015-0873-0	2015	Jack, J; Rytwinski, T; Fahrig, L; Francis, CM	Influence of traffic mortality on forest bird abundance	NA	NA	Sites are not in the bioclimatic region
ZR_13742	ZR	NA	2001	Jakubiec, Zbigniew; Jadczyk, Piotr	Winter aggregations of the rook Corvus frugilegus in Silesia.	NA	NA	Pdf cannot be obtained
ZR_4207	ZR	NA	2009	Jambor, Radovan	Bird communities of a river ecosystem influenced by human.	NA	NA	Language is not English or French
WOS_14138	WOS	10.2307/3802985	2000	James, A. R. C.; Stuart-Smith, A. K.	Distribution of caribou and wolves in relation to linear corridors	NA	Journal of Wildlife Management	Sites are not in the bioclimatic region
WOS_14192	WOS	10.1111/j.1526-100X.2005.00035.x	2005	Jansen, A.	Avian use of restoration plantings along a creek linking rainforest patches on the Atherton Tablelands, North Queensland	NA	Restoration Ecology	The document meets exclusion criteria for waterways
WOS_14193	WOS	10.1016/S0006-3207(00)00235-4	2001	Jansen, A.; Robertson, A. I.	Riparian bird communities in relation to land management practices in floodplain woodlands of south-eastern Australia	NA	Biological Conservation	Results are in an unexploitable format
ZR_13755	ZR	NA	2003	Jansen, Rinus	How to map and check raptor nests along highways.	NA	NA	Language is not English or French
ZR_4228	ZR	NA	1994	Jarzembowski, Tomasz; Ostrach, Agnieszka	New locality of Barbastella barbastellus (Schreber, 1774) in northern Poland.	NA	NA	Language is not English or French
WOS_14297	WOS	NA	2014	Jedlicka, Julie A.; Greenberg, Russell; Raimondi, Peter T.	VINEYARD AND RIPARIAN HABITAT, NOT NEST BOX PRESENCE, ALTER AVIAN COMMUNITY COMPOSITION	NA	Wilson Journal of Ornithology	Sampling points are not on verges (exposure)
GS_61	GREY_LITT_GoogleScholar	NA	1972	Jefferies, D. J., & French, M. C.	Lead concentrations in small mammals trapped on roadside verges and field sites	NA	NA	The document meets previous screening exclusion criteria (Outcome)
ZR_4249	ZR	10.1016/0006-3207(81)90023-9	1981	Jenkins, D.	Ecology of otters in northern Scotland 4. A model scheme for otter Lutra lutra L. conservation in a freshwater system in Aberdeenshire.	NA	NA	The comparator is inappropriate
WOS_14323	WOS	10.1002/rra.2723	2015	Jenkins, K. J.; Chelgren, N. D.; Sager-Fradkin, K. A.; Happe, P. J.; Adams, M. J.	OCCUPANCY PATTERNS OF MAMMALS AND LENTIC AMPHIBIANS IN THE ELWHA RIVER RIPARIAN ZONE BEFORE DAM REMOVAL	NA	River Research and Applications	The comparator is inappropriate
ZR_13795	ZR	NA	1995	Jenkins, R. K. B.; Buckton, S. T.; Ormerod, S. J.	Local movements and population density of water rails Rallus aquaticus in a small inland reedbed.	NA	NA	The document meets previous screening exclusion criteria (Exposure)
WOS_14329	WOS	10.1016/j.foreco.2013.04.041	2013	Jenkins, Stephanie R.; Betts, Matthew G.; Huso, Manuela M.; Hagar, Joan C.	Habitat selection by juvenile Swainson's thrushes (Catharus ustulatus) in headwater riparian areas, Northwestern Oregon, USA	NA	Forest Ecology and Management	The document meets exclusion criteria for waterways
WOS_14330	WOS	10.1111/j.1469-7998.1998.tb00186.x	1998	Jenkinson, S.; Wheater, C. P.	The influence of public access and sett visibility on badger (Meles meles) sett disturbance and persistence	NA	Journal of Zoology	The document does not dealt with our 6 specific questions
ZR_13808	ZR	NA	2009	Jermaczek, Danuta; Orzechowski, Ryszard	Wintering of birds in midfield tree stretches in Lagowski Landscape Park and its buffer zone (Lubuskie Province) in the season 2007-2008.	NA	NA	Language is not English or French
ZR_13823	ZR	NA	2005	Jiang, Guang-Shun; Zhang, Ming-Hai; Ma, Jian-Zhang	The fragmentation and impact factors of red deer habitat in Wandashan region, Heilongjiang Province, China.	NA	NA	Pdf cannot be obtained
ZR_4280	ZR	NA	1987	Joachim, J.	La mesange nonnette Parus palustris dans les ripisilves garonnaises.	NA	NA	The comparator is inappropriate
WOS_14535	WOS	NA	2011	Jobin, Benoit; Fradette, Pierre; Labrecque, Sandra	Habitat Use by Least Bitterns (Ixobrychus exilis) in Quebec	NA	Waterbirds	Sites are not in the bioclimatic region
WOS_14545	WOS	10.1163/156853807779799126	2007	Jofre, Gabriela; Reading, Christopher; di Tada, Ismael	Habitat selection in the Pampa de Achala toad, Bufo achalensis	NA	Amphibia-Reptilia	Sites are not in the bioclimatic region
ZR_13840	ZR	NA	2004	Joger, Ulrich; Nicolay, Harald	Distribution and status of the adder, Vipera berus (Linnaeus, 1758) in Hessia.	NA	NA	Language is not English or French
ZR_13841	ZR	NA	2003	Joger, Ulrich; Schmidt, Detlef	Distribution and abundance of the midwife toad (Alytes obstetricans) in Hessia.	NA	NA	Pdf cannot be obtained
ACTU_WOS_F_2912	WOS	10.1063/1.4966873	2016	Johana, JN; Muzzneena, AM; Grismer, LL; Norhayati, A	Species Composition, Diversity and Relative Abundance of Amphibians in Forests and Non-Forest Habitats on Langkawi Island, Peninsular Malaysia	NA	NA	Sites are not in the bioclimatic region
WOS_14567	WOS	NA	2009	John, Frantisek; Kostkan, Vlastimil	Compositional analysis and GPS/GIS for study of habitat selection by the European beaver, Castor fiber in the middle reaches of the Morava River	NA	Folia Zoologica	Results are in an unexploitable format
WOS_14575	WOS	NA	2004	Johnson, A. C.; Musslewhite, J.; De Santo, T. L.; Edwards, R. T.	Observed changes in ground saturation, aquatic invertebrate densities, and breeding bird populations following various harvesting intensities	NA	Balancing Ecosystem Values: Innovative Experiments for Sustainable Forestry	The document meets exclusion criteria for waterways
ACTU_WOS_T_6878	WOS	10.1016/j.foreco.2016.03.004	2016	Johnson, BA; Barrett, K; Homyack, JA; Baldwin, RF	Anuran occupancy and breeding site use of aquatic systems in a managed pine landscape	NA	NA	The document meets previous screening exclusion criteria (Exposure)
ACTU_WOS_T_5800	WOS	10.1016/j.foreco.2016.08.012	2016	Johnson, BA; Homyack, JA; Barrett, K; Baldwin, RF	Factors influencing herpetofaunal assemblages of aquatic systems in a managed pine forest	NA	NA	The document meets previous screening exclusion criteria (Exposure)
WOS_14582	WOS	10.1016/j.biocon.2014.06.007	2014	Johnson, Chris J.; Russell, Don E.	Long-term distribution responses of a migratory caribou herd to human disturbance	NA	Biological Conservation	Sites are not in the bioclimatic region
ACTU_GREY_LITT_60	GREY_LITT_FrontiersIn	10.3389/fevo.2017.00036	2017	Johnson, Christopher D.; Evans, Daryl; Jones, Darryl	Birds and Roads: Reduced Transit for Smaller Species over Roads within an Urban Environment	NA	Frontiers in Ecology and Evolution	The document meets previous screening exclusion criteria (Outcome)
ZR_13854	ZR	NA	2011	Johnson, Douglas H.; Holloran, Matthew J.; Connelly, John W.; Hanser, Steven E.; Amundson, Courtney L.; Knick, Steven T.	Influences of Environmental and Anthropogenic Features on Greater Sage-Grouse Populations, 1997-2007.	NA	NA	The study type is inappropriate (no data, simulation, recommendation)
ZR_4299	ZR	NA	2008	Johnson, James A.; Andres, Brad A.; Bissonette, John A.	Birds of the major mainland rivers of southeast Alaska.	NA	NA	Sites are not in the bioclimatic region
WOS_14600	WOS	NA	2010	Johnson, Joshua B.; Ford, W. Mark; Edwards, John W.; Menzel, Michael A.	Bat community structure within riparian areas of northwestern Georgia, USA	NA	Folia Zoologica	Results are in an unexploitable format
ZR_13856	ZR	10.1656/1092-6194-15.3.453	2008	Johnson, Joshua B.; Gates, J. Edward	Spring migration and roost selection of female Myotis leibii in Maryland.	NA	NA	The comparator is inappropriate
ZR_4306	ZR	NA	2007	Johnson, Matthew J.; Holmes, Jennifer A.; Calvo, Christopher; Samuels, Ivan; Krantz, Stefani; Sogge, Mark K.	Yellow-billed cuckoo distribution, abundance, and habitat use along the Lower Colorado and tributaries, 2006 annual report.	NA	NA	Sites are not in the bioclimatic region
WOS_14626	WOS	NA	1998	Johnson, S. R.	Distribution and movements of brood-rearing lesser snow geese in relation to petroleum development in Arctic Alaska	NA	Arctic	Sites are not in the bioclimatic region
WOS_14643	WOS	10.2307/2424918	1979	JOHNSON, WC; SCHREIBER, RK; BURGESS, RL	DIVERSITY OF SMALL MAMMALS IN A POWERLINE RIGHT-OF-WAY AND ADJACENT FOREST IN EAST TENNESSEE	NA	American Midland Naturalist	The comparator is inappropriate
WOS_14649	WOS	10.1139/Z02-213	2002	Johnston, B.; Frid, L.	Clearcut logging restricts the movements of terrestrial Pacific giant salamanders (Dicamptodon tenebrosus Good)	NA	Canadian Journal of Zoology-Revue Canadienne De Zoologie	The document meets exclusion criteria for waterways
WOS_14688	WOS	10.1016/j.foreco.2008.02.019	2008	Jones, Benjamin C.; Kleitch, Jennifer L.; Harper, Craig A.; Buehler, David A.	Ruffed grouse brood habitat use in a mixed hardwood forest: Implications for forest management in the Appalachians	NA	Forest Ecology and Management	The document meets previous screening exclusion criteria (Exposure)
ACTU_WOS_T_3752	WOS	10.1016/j.envpol.2016.11.060	2017	Jones, DK; Mattes, BM; Hintz, WD; Schuler, MS; Stoler, AB; Lind, LA; Cooper, RO; Relyea, RA	Investigation of road salts and biotic stressors on freshwater wetland communities	NA	NA	Sites are not in the bioclimatic region
WOS_14698	WOS	10.1002/ece3.884	2014	Jones, Isabel L.; Bull, Joseph W.; Milner-Gulland, Eleanor J.; Esipov, Alexander V.; Suttle, Kenwyn B.	Quantifying habitat impacts of natural gas infrastructure to facilitate biodiversity offsetting	NA	Ecology and Evolution	Sites are not in the bioclimatic region
WOS_14702	WOS	NA	2002	Jones, J. C.	Influences of soil acidity levels on vegetative reclamation and wildlife habitat on rights-of-way transecting drastically-disturbed lands	NA	NA	Pdf cannot be obtained
WOS_14715	WOS	NA	2002	Jones, M.; Aarons, S.	Productive grazing, healthy rivers: Improving riparian and in-stream biodiversity	NA	Wool Technology and Sheep Breeding	The study type is inappropriate (no data, simulation, recommendation)
WOS_14731	WOS	NA	2012	Jones, Stephanie L.; White, Gary C.	THE EFFECT OF HABITAT EDGES ON NEST SURVIVAL OF SPRAGUE'S PIPITS	NA	Wilson Journal of Ornithology	Sites are not in the bioclimatic region
WOS_14740	WOS	NA	2014	Jongsma, Gregory F. M.; Hedley, Richard W.; Duraes, Renata; Karubian, Jordan	AMPHIBIAN DIVERSITY AND SPECIES COMPOSITION IN RELATION TO HABITAT TYPE AND ALTERATION IN THE MACHE-CHINDUL RESERVE, NORTHWEST ECUADOR	NA	Herpetologica	Sites are not in the bioclimatic region
WOS_14747	WOS	10.1007/s11284-012-0974-0	2012	Jonsson, Micael; Strasevicius, Darius; Malmqvist, Bjorn	Influences of river regulation and environmental variables on upland bird assemblages in northern Sweden	NA	Ecological Research	Sites are not in the bioclimatic region
ACTU_WOS_F_2173	WOS	10.1016/j.agee.2016.05.028	2016	Jordan, MA; Castaneda, AJ; Smiley, PC; Gillespie, RB; Smith, DR; King, KW	Influence of instream habitat and water chemistry on amphibians in channelized agricultural headwater streams	NA	NA	Sites are not in the bioclimatic region
ACTU_WOS_F_2081	WOS	10.1111/btp.12333	2016	Jorge, RF; Simoes, PI; Magnusson, WE; Lima, AP	Fine-scale habitat heterogeneity explains the local distribution of two Amazonian frog species of concern for conservation	NA	NA	Sites are not in the bioclimatic region
WOS_14759	WOS	10.1023/A:1006491702574	2000	Jorgensen, E. E.; Canfield, T. J.; Kutz, F. W.	Restored riparian buffers as tools for ecosystem restoration in the MAIA; Processes, endpoints, and measures of success for water, soil, flora, and fauna	NA	Environmental Monitoring and Assessment	The study type is inappropriate (no data, simulation, recommendation)
ACTU_WOS_T_5186	WOS	10.1016/j.biocon.2016.11.026	2017	Joseph, GS; Seymour, CL; Foord, SH	The effect of infrastructure on the invasion of a generalist predator: Pied crows in southern Africa as a case-study	NA	NA	Sites are not in the bioclimatic region
ACTU_WOS_F_2668	WOS	10.1007/s10530-015-1046-5	2016	Jourdan, J; Westerwald, B; Kiechle, A; Chen, W; Streit, B; Klaus, S; Oetken, M; Plath, M	Pronounced species turnover, but no functional equivalence in leaf consumption of invasive amphipods in the river Rhine	NA	NA	The study type is inappropriate (no data, simulation, recommendation)
WOS_14794	WOS	NA	2009	Jowett, I. G.; Richardson, J.; Boubee, J. A. T.	Effects of riparian manipulation on stream communities in small streams: two case studies	NA	New Zealand Journal of Marine and Freshwater Research	The document meets exclusion criteria for waterways
ZR_4395	ZR	NA	2015	Jun, Feng; Jihui, Zhang; Yilin, Shu; Long, Yao; Xinsheng, Tang; Hailong, Wu	The geographic distribution pattern and habitat selection of the Chinese concave-eared torrent frog in southern Anhui Province.	NA	NA	Language is not English or French
WOS_14842	WOS	10.1670/0022-1511(2002)036[0390:EOCSFA]2.0.CO;2	2002	Jung, R. E.; Bonine, K. E.; Rosenshield, M. L.; de la Reza, A.; Raimondo, S.; Droege, S.	Evaluation of canoe surveys for anurans along the Rio Grande in Big Bend National Park, Texas	NA	Journal of Herpetology	Sites are not in the bioclimatic region
ZR_4401	ZR	NA	2005	Jungwirth, Jason D.; Dieter, Charles D.; Munsterman, Alison	Beaver (Castor canadensis) habitat use in eastern South Dakota, 2000-2001.	NA	NA	Sites are not in the bioclimatic region
WOS_14853	WOS	10.1007/BF01651222	1998	Junker-Bornholdt, R.; Wagner, M.; Zimmermann, M.; Simonis, S.; Schmidt, K. H.; Wiltschko, W.	The impact of a motorway in construction and after opening to traffic on the breeding biology of Great Tit (Parus major) and Blue Tit (P-caeruleus)	NA	Journal Fur Ornithologie	Language is not English or French
WOS_14878	WOS	10.2981/11-042	2012	Just, Emily H.; Stevens, Sadie S.; Spinola, Romeo M.; Serfass, Thomas L.	Detecting river otter Lontra canadensis latrines near bridges: does habitat and season influence survey success?	NA	Wildlife Biology	The comparator is inappropriate
EM_262	GREY_LITT_email_request	NA	2006	Kabouche, Benjamin; Bayeul, Julie; Zimmermann, Laurent; Bayle, Patrick	La mortalité des oiseaux sur le réseau électrique aérien : enjeux et perspectives en Provence-Alpes- Côte d’Azur	NA	NA	The type of document is not appropriate
WOS_14910	WOS	10.1016/S0006-3207(02)00273-2	2003	Kaczensky, P.; Knauer, F.; Krze, B.; Jonozovic, M.; Adamic, M.; Gossow, H.	The impact of high speed, high volume traffic axes on brown bears in Slovenia	NA	Biological Conservation	The study type is inappropriate (no data, simulation, recommendation)
ZR_4422	ZR	NA	2004	Kaesewiester, Daniel; Baumann, Niels; Voelkl, Wolfgang	Population structure and spatial distribution of the adder (Vipera berus (Linnaeus, 1758)) in the Lech Valley: are habitat connection measures feasible?	NA	NA	Pdf cannot be obtained
ZR_4423	ZR	NA	2003	Kaesewieter, Daniel; Voelkl, Wolfgang	Habitat requirements of the smooth snake (Coronella austriaca) in the Lech valley (southern Bavaria).	NA	NA	Pdf cannot be obtained
ACTU_WOS_T_29	WOS	10.1016/j.agee.2017.11.003	2018	Kahnonitch, I; Lubin, Y; Korine, C	Insectivorous bats in semi-arid agroecosystems - effects on foraging activity and implications for insect pest control	NA	NA	Results are in an unexploitable format
WOS_14942	WOS	10.1163/156853909X404457	2009	Kaiser, Kristine; Hammers, Jessica L.	The effect of anthropogenic noise on male advertisement call rate in the neotropical treefrog, Dendropsophus triangulum	NA	Behaviour	Sites are not in the bioclimatic region
ACTU_WOS_F_1221	WOS	NA	2017	Kajtoch, L; Figarski, T	Comparative distribution of Syrian and great spotted woodpeckers in different landscapes of Poland	NA	NA	The comparator is inappropriate
ACTU_WOS_F_2139	WOS	10.1017/S0959270915000179	2016	Kajtoch, L; Wilk, T; Bobrek, R; Matysek, M	The importance of forests along submontane stream valleys for bird conservation: The Carpathian example	NA	NA	Sites are not in the bioclimatic region
ZR_13926	ZR	NA	2002	Kajzer, Zbigniew	Untypical location of the common gull Larus canus nests.	NA	NA	Pdf cannot be obtained
ZR_4441	ZR	NA	2010	Kalivodova, Eva; Cumova, Dagmar; Cvachova, Alzbeta	Avifauna of the Pozba municipality (central Slovakia).	NA	NA	Pdf cannot be obtained (and language is not English or French)
WOS_15001	WOS	NA	2000	Kam, Y. C.; Chen, T. C.	Abundance and movement of a riparian frog (Rana swinhoana) in a subtropical forest of Guandau Stream, Taiwan	NA	Zoological Studies	The document meets exclusion criteria for waterways
ZR_4451	ZR	NA	2004	Kamburova, Nevena T.	Magpie (Pica pica) population density and habitat distribution in the city of Sofia.	NA	NA	The comparator is inappropriate
WOS_15059	WOS	NA	2012	Kang, Jung-Hoon; Rhim, Shin-Jae	Distribution and Habitat Conditions of Habitat Points of the Eurasian Otter Lutra lutra in the Hangang River Water System, South Korea	NA	Journal of Animal and Veterinary Advances	Sites are not in the bioclimatic region
ACTU_ZR_T_1150	ZR	NA	2016	Kanuch, Peter; Nado, Ladislav; Kristin, Anton	A noteworthy record of Rhinolophus hipposideros nursery roost under a road bridge.	NA	NA	Sites are not in the bioclimatic region
ZR_13956	ZR	NA	2010	Kapfer, Joshua M.; Mueller, William P.; Bub, Brian R.; Engelhardt, James W.	The response of nesting ospreys (Pandion haliaetus) to maintenance activities along transmission lines in central Wisconsin.	NA	NA	Sites are not in the bioclimatic region
WOS_15138	WOS	10.1139/X11-145	2011	Kardynal, K. J.; Morissette, J. L.; Van Wilgenburg, S. L.; Bayne, E. M.; Hobson, K. A.	Avian responses to experimental harvest in southern boreal mixedwood shoreline forests: implications for riparian buffer management	NA	Canadian Journal of Forest Research-Revue Canadienne De Recherche Forestiere	Sites are not in the bioclimatic region
ACTU_WOS_T_1934	WOS	10.1093/jmammal/gyx066	2017	Karelus, DL; McCown, JW; Scheick, BK; van de Kerk, M; Bolker, BM; Oli, MK	Effects of environmental factors and landscape features on movement patterns of Florida black bears	NA	NA	Sampling points are not on verges (exposure)
ACTU_WOS_T_6748	WOS	NA	2016	Karlin, M; Vaclavik, T; Chadwick, J; Meentemeyer, R	Habitat use by adult red wolves, Canis rufus, in an agricultural landscape, North Carolina, USA	NA	NA	The document meets previous screening exclusion criteria (Exposure)
WOS_15172	WOS	NA	2007	Karraker, Nancy E.	ARE EMBRYONIC AND LARVAL GREEN FROGS (RANA CLAMITANS) INSENSITIVE TO ROAD DEICING SALT?	NA	Herpetological Conservation and Biology	Sites are not in the bioclimatic region
ZR_13980	ZR	10.1016/j.envpol.2010.11.019	2011	Karraker, Nancy E.; Gibbs, James P.	Road deicing salt irreversibly disrupts osmoregulation of salamander egg clutches.	NA	NA	Sites are not in the bioclimatic region
WOS_15174	WOS	10.1890/07-1644.1	2008	Karraker, Nancy E.; Gibbs, James P.; Vonesh, James R.	Impacts of road deicing salt on the demography of vernal pool-breeding amphibians	NA	Ecological Applications	Sites are not in the bioclimatic region
WOS_15175	WOS	10.1016/j.envres.2008.09.001	2009	Karraker, Nancy E.; Ruthig, Gregory R.	Effect of road deicing salt on the susceptibility of amphibian embryos to infection by water molds	NA	Environmental Research	Sites are not in the bioclimatic region
ZR_13985	ZR	NA	1996	Kartanas, Edmund	Breeding birds communities inhabiting vegetation belts along mid-field roads.	NA	NA	Pdf cannot be obtained
ZR_13995	ZR	NA	2006	Karyakin, I. V.	Expansion of the imperial eagle onto power lines in western Kazakhstan.	NA	NA	Language is not English or French
ZR_4488	ZR	NA	2008	Karyakin, I. V.; Pazhenkov, A. S.	The white-tailed eagle in the Samara district, Russia.	NA	NA	Sites are not in the bioclimatic region
ACTU_WOS_T_8068	WOS	NA	2016	Kasparova, I; Pecharova, E; Marsalek, M	RECOVERING IMPORTANT WETLAND HABITATS - A BYPRODUCT OF MODERNIZATION OF THE RAILWAY TRACK PRAHA BECHOVICE UVALY (CASE STUDY)	NA	NA	Pdf cannot be obtained
ZR_14011	ZR	10.2307/1381956	1990	Kaufman, D. W.; Kaufman, G. A.	House mice (Mus musculus) in natural and disturbed habitats in Kansas.	NA	NA	Results are in an unexploitable format
ACTU_ZR_T_908	ZR	NA	2016	Kaufman, Donald W.; Kaufman, Glennis A.	The southern bog lemming in north-central Kansas: Unusual habitats.	NA	NA	The document meets previous screening exclusion criteria (Exposure)
ACTU_ZR_F_113	ZR	NA	2017	Kaufman, Donald W.; Kaufman, Glennis A.	Low biodiversity of small mammals in soybean fields in the northern Flint Hills, Kansas.	NA	NA	The document meets exclusion criteria for waterways
WOS_15239	WOS	10.1016/j.foreco.2013.06.004	2013	Kaufmann, Jillian; Bork, Edward W.; Alexander, Michael J.; Blenis, Peter V.	Habitat selection by cattle in Foothill landscapes following variable harvest of aspen forest	NA	Forest Ecology and Management	Sites are not in the bioclimatic region
ZR_14014	ZR	NA	2003	Kauhala, Kaarina	Rabies and spatial ecology of red fox in Europe: a comparison with preliminary results of the Finnish carnivore community.	NA	NA	Pdf cannot be obtained
ACTU_WOS_T_9190	WOS	NA	2015	Kaunert, MD; McBrayer, LD	POPULATION DENSITY OF THE FLORIDA SCRUB LIZARD (SCELOPORUS WOODI) IN MANAGED FLORIDA SCRUB AND LONGLEAF PINE SANDHILL HABITATS	NA	NA	The document meets previous screening exclusion criteria (Exposure)
WOS_15259	WOS	NA	1996	Kavanagh, R. P.	The breeding biology and diet of the masked owl Tyto novaehollandiae near Eden, New South Wales	NA	Emu	The document meets exclusion criteria for waterways
ZR_4512	ZR	NA	2004	Kawabe, Momoki	A habitat and factors limiting the disrtribution [distribution] of Japanese wagtail, Motacilla grandis.	NA	NA	Pdf cannot be obtained
ZR_4513	ZR	NA	2005	Kawabe, Momoki	Factors of the habitat preference of Japanese wagtail, Motacilla grandis.	NA	NA	Pdf cannot be obtained
ZR_4514	ZR	NA	2005	Kawabe, Momoki	Seasonal movements at the northern margin of the distribution of Japanese wagtail, Motacilla grandis.	NA	NA	Pdf cannot be obtained
WOS_15268	WOS	10.1046/j.1365-2427.2001.00667.x	2001	Kawaguchi, Y.; Nakano, S.	Contribution of terrestrial invertebrates to the annual resource budget for salmonids in forest and grassland reaches of a headwater stream	NA	Freshwater Biology	Sites are not in the bioclimatic region
ZR_14022	ZR	NA	2006	Kaye, Delia R. J.; Walsh, Kevin M.; Rulison, Eric L.; Ross, Christopher C.	Spotted turtle use of a culvert under relocated route 44 in Carver, Massachusetts.	NA	NA	The document meets previous screening exclusion criteria (Exposure)
ACTU_ZR_T_1087	ZR	NA	2016	Kaze, Joshua; Whiting, Jericho C.; Freeman, Eric D.; Bates, Steven B.; Larsen, Randy T.	Birth-site selection and timing of births in American bison: effects of habitat and proximity to anthropogenic features.	NA	NA	Sites are not in the bioclimatic region
ACTU_WOS_F_622	WOS	10.1650/CONDOR-17-23.1	2017	Kearns, LJ; Rodewald, AD	Does nest predator activity predict the location and survival of songbird nests in urbanizing landscapes?	NA	NA	The document meets previous screening exclusion criteria (Exposure)
ZR_14029	ZR	10.1644/BME-004	2004	Keeley, Annika T. H.; Keeley, Brian W.	The mating system of Tadarida brasiliensis (Chiroptera: Molossidae) in a large highway bridge colony.	NA	NA	The document meets previous screening exclusion criteria (Exposure)
ACTU_ZR_T_1019	ZR	NA	2016	Keith, R.D.; Grooms, B.; Urbanek, R.E.	Impacts of Man-Made Structures on Avian Community Metrics in 4 State Parks in Northwestern Arkansas.	NA	NA	The document meets previous screening exclusion criteria (Exposure)
WOS_15341	WOS	10.1016/0304-4009(75)90015-7	1975	KELCEY, JG	OPPORTUNITIES FOR WILDLIFE HABITATS ON ROAD VERGES IN A NEW CITY	NA	Urban Ecology	There is no comparator
WOS_15353	WOS	NA	1993	KELLER, CME; ROBBINS, CS; HATFIELD, JS	AVIAN COMMUNITIES IN RIPARIAN FORESTS OF DIFFERENT WIDTHS IN MARYLAND AND DELAWARE	NA	Wetlands	The document meets exclusion criteria for waterways
WOS_15367	WOS	10.2307/1565271	2000	Keller, W. L.; Heske, E. J.	Habitat use by three species of snakes at the Middle Fork Fish and Wildlife Area, Illinois	NA	Journal of Herpetology	Sites are not in the bioclimatic region
ACTU_GREY_LITT_17	GREY_LITT_IENE2016	10.25225/fozo.v64.i4.a9.2015	2015	Kelm, Juliane; Lange, Annika; Shultz, Björn; Göttsche, Matthias; Steffens, Thomas; Reck, Heinrich	How often does a strictly arboreal mammal voluntarily cross roads? New insights into the behaviour of the hazel dormouse in roadside habitats	NA	Folia Zoologica - Praha	The document meets previous screening exclusion criteria (Outcome)
WOS_15400	WOS	NA	2009	Kemp, Alan; Kemp, Meg; Thong-Aree, Siriporn	Surveys of nocturnal birds at Bala rainforest, southern Thailand	NA	Forktail	Sites are not in the bioclimatic region
WOS_15427	WOS	NA	1996	Kennett, R.; Tory, O.	Diet of two freshwater turtles, Chelodina rugosa and Elseya dentata (Testudines: Chelidae) from the wet-dry tropics of northern Australia	NA	Copeia	Sites are not in the bioclimatic region
ZR_4578	ZR	NA	2012	Kern, Madeleine M.; Guzy, Jacquelyn C.; Price, Steven J.; Hunt, Stephanie D.; Eskew, Evan A.; Dorcas, Michael E.	RIPARIAN-ZONE AMPHIBIANS AND REPTILES WITHIN THE BROAD RIVER BASIN OF SOUTH CAROLINA.	NA	NA	The comparator is inappropriate
ZR_14067	ZR	NA	2008	Kerth, Gerald; Melber, Markus	Species-specific barrier effects of a motorway on the habitat use of two threatened forest-living bat species.	NA	NA	The comparator is inappropriate
WOS_15468	WOS	10.1614/IPSM-D-11-00036.1	2011	Kessler, Andrew C.; Merchant, James W.; Allen, Craig R.; Shultz, Steven D.	Impacts of Invasive Plants on Sandhill Crane (Grus canadensis) Roosting Habitat	NA	Invasive Plant Science and Management	Sites are not in the bioclimatic region
ACTU_WOS_F_530	WOS	NA	2017	Ketcham, SL; Koprowski, JL; Falk, DA	Differential response of native Arizona gray squirrels and introduced Abert's squirrels to a mosaic of burn severities	NA	NA	Sites are not in the bioclimatic region
WOS_15483	WOS	10.1111/j.1469-7998.2008.00440.x	2008	Keuroghlian, A.; Eaton, D. P.	Importance of rare habitats and riparian zones in a tropical forest fragment: preferential use by Tayassu pecari, a wide-ranging frugivore	NA	Journal of Zoology	The document meets exclusion criteria for waterways
ACTU_ZR_T_862	ZR	NA	2016	Keya, Zeinab Yeganeh; Faryadi, Shahrzad; Yavari, Ahmadreza; Kamali, Yahya; Shabani, Afshin Alizadeh	Habitat Suitability & Connectivity of Alborz Wild Sheep in the East of Tehran, Iran.	NA	NA	The study type is inappropriate (no data, simulation, recommendation)
WOS_15506	WOS	10.1007/s10750-007-9236-5	2008	Khan, B.; Colbo, M. H.	The impact of physical disturbance on stream communities: lessons from road culverts	NA	Hydrobiologia	Sites are not in the bioclimatic region
ZR_14077	ZR	NA	2004	Khan, Hammad Ahmad; Beg, Mirza Azhar; Khan, Akbar Ali	Breeding habitats of the rose-ringed parakeet (Psittacula krameri) in the cultivations of Central Punjab.	NA	NA	Sites are not in the bioclimatic region
ACTU_WOS_T_9924	WOS	10.1093/icb/icv070	2015	Kight, CR; Swaddle, JP	Eastern Bluebirds Alter their Song in Response to Anthropogenic Changes in the Acoustic Environment	NA	NA	The document meets previous screening exclusion criteria (Outcome)
WOS_15582	WOS	10.2307/3802265	1998	Kilgo, J. C.; Sargent, R. A.; Chapman, B. R.; Miller, K. V.	Effect of stand width and adjacent habitat on breeding bird communities in bottomland hardwoods	NA	Journal of Wildlife Management	The comparator is inappropriate
ZR_14099	ZR	NA	2006	Killmaster, Charles H.; Osborn, David A.; Warren, Robert J.; Miller, Karl V.	Effect of roads and traffic on deer movements in a Georgia Park.	NA	NA	The comparator is inappropriate
WOS_15691	WOS	NA	2002	King, D. I.; Byers, B. E.	An evaluation of powerline rights-of-way as habitat for early-successional shrubland birds	NA	Wildlife Society Bulletin	Sites are not in the bioclimatic region
WOS_15692	WOS	NA	2002	King, D. I.; DeGraaf, R. M.	The effect of forest roads on the reproductive success of forest-dwelling passerine birds	NA	Forest Science	Sites are not in the bioclimatic region
WOS_15693	WOS	10.1016/j.biocon.2009.06.016	2009	King, David I.; Chandler, Richard B.; Collins, Jeffrey M.; Petersen, Wayne R.; Lautzenheiser, Thomas E.	Effects of width, edge and habitat on the abundance and nesting success of scrub-shrub birds in powerline corridors	NA	Biological Conservation	Sites are not in the bioclimatic region
WOS_15717	WOS	NA	1997	Kinley, T. A.; Newhouse, N. J.	Relationship of riparian reserve zone width to bird density and diversity in southeastern British Columbia	NA	Northwest Science	Sites are not in the bioclimatic region
WOS_15735	WOS	10.1002/rra.1103	2009	Kinzel, Paul J.; Nelson, Jonathan M.; Heckman, Ashley K.	RESPONSE OF SANDHILL CRANE (GRUS CANADENSIS) RIVERINE ROOSTING HABITAT	NA	River Research and Applications	Sites are not in the bioclimatic region
ACTU_ZR_T_599	ZR	NA	2016	Kirazli, Cihangir	The impact of some spatial factors on disturbance and reaction distances on nest occupation by the near threatened Cinereous Vulture (Aegypius monachus).	NA	NA	Sampling points are not on verges (exposure)
WOS_15768	WOS	10.2193/2008-567	2010	Kirkpatrick, Chris; Conway, Courtney J.	Importance of Montane Riparian Forest and Influence of Wildfire on Nest-Site Selection of Ground-Nesting Birds	NA	Journal of Wildlife Management	Sites are not in the bioclimatic region
WOS_15779	WOS	NA	1997	Kirsch, E. M.	Small mammal community composition in cornfields, roadside ditches, and prairies in eastern Nebraska	NA	Natural Areas Journal	Sites are not in the bioclimatic region
WOS_15780	WOS	10.1525/cond.2012.110209	2013	Kirsch, Eileen M.; Heglund, Patricia J.; Gray, Brian R.; McKann, Patrick	SONGBIRD USE OF FLOODPLAIN AND UPLAND FORESTS ALONG THE UPPER MISSISSIPPI RIVER CORRIDOR DURING SPRING MIGRATION	NA	Condor	Sites are not in the bioclimatic region
ACTU_WOS_F_1231	WOS	NA	2017	Kirsch, EM; Wellik, MJ	Tree Species Preferences of Foraging Songbirds During Spring Migration in Floodplain Forests of the Upper Mississippi River	NA	NA	Sites are not in the bioclimatic region
WOS_15787	WOS	10.1134/S1995425513030098	2013	Kiseleva, N. V.; Sorokin, P. A.	Study of the distribution of mustelids over the Southern Urals using noninvasive methods	NA	Contemporary Problems of Ecology	Sites are not in the bioclimatic region
WOS_15789	WOS	10.1111/j.1440-1703.2004.00637.x	2004	Kishi, D.; Murakami, M.; Nakano, S.; Taniguchi, Y.	Effects of forestry on the thermal habitat of Dolly Varden (Salvelinus malma)	NA	Ecological Research	Sites are not in the bioclimatic region
WOS_15794	WOS	10.2193/2007-010	2008	Kissling, Michelle L.; Garton, Edward O.	Forested buffer strips and breeding bird communities in southeast Alaska	NA	Journal of Wildlife Management	The document meets previous screening exclusion criteria (Exposure)
ZR_4667	ZR	NA	1994	Kitchener, D. J.; Hisheh, S.; Schmitt, L. H.; Suyanto, A.	Shrews (Soricidae: Crocidura) from the Lesser Sunda Islands, and south-east Maluku, eastern Indonesia.	NA	NA	Sites are not in the bioclimatic region
ZR_14157	ZR	10.2307/1381593	1987	Klatt, B. J.; Getz, L. L.	Vegetation characteristics of Microtus ochrogaster and M. pennsylvanicus habitats in east-central Illinois.	NA	NA	Sites are not in the bioclimatic region
WOS_15828	WOS	10.1023/A:1005903822990	1998	Klauda, R.; Kazyak, P.; Stranko, S.; Southerland, M.; Roth, N.; Chaillou, J.	Maryland Biological Stream Survey: A state agency program to assess the impact of anthropogenic stresses on stream habitat quality and biota	NA	Environmental Monitoring and Assessment	The document meets exclusion criteria for waterways
WOS_15830	WOS	10.1657/1523-0430(2003)035[0100:TSHART]2.0.CO;2	2003	Klaus, M.	The status, habitat, and response to grazing of water vole populations in the Big Horn Mountains of Wyoming, USA	NA	Arctic Antarctic and Alpine Research	Sites are not in the bioclimatic region
WOS_15831	WOS	10.2307/1552258	1999	Klaus, M.; Moore, R. E.; Vyse, E.	Impact of precipitation and grazing on the water vole in the Beartooth Mountains of Montana and Wyoming, USA	NA	Arctic Antarctic and Alpine Research	Sites are not in the bioclimatic region
WOS_15846	WOS	10.1890/07-1684.1	2009	Klein, Carissa; Wilson, Kerrie; Watts, Matthew; Stein, Janet; Berry, Sandra; Carwardine, Josie; Smith, Mark Stafford; Mackey, Brendan; Possingham, Hugh P.	Incorporating ecological and evolutionary processes into continental-scale conservation planning	NA	Ecological Applications	The study type is inappropriate (no data, simulation, recommendation)
WOS_15849	WOS	10.1111/j.1526-100X.2007.00206.x	2007	Klein, Linda R.; Clayton, Stephen R.; Alldredge, J. Richard; Goodwin, Peter	Long-term monitoring and evaluation of the Lower Red River Meadow Restoration Project, Idaho, USA	NA	Restoration Ecology	Sites are not in the bioclimatic region
ZR_4694	ZR	NA	2009	Kler, Tejdeep Kaur	Avifaunal diversity in green belts along the Sirhind canal and its branches in Punjab.	NA	NA	Pdf cannot be obtained
ACTU_WOS_T_652	WOS	10.22438/jeb/39/2/MRN-285	2018	Kler, TK; Kumar, M; Vashishat, N	Effects of electromagnetic radiations on diversity and breeding biology of birds living near power lines and mobile towers at Ludhiana, Punjab	NA	NA	Sites are not in the bioclimatic region
ZR_14174	ZR	NA	2010	Klinkowski-Clark, Christine; Kutilek, Michael J.; Matson, John O.; Messina, Paula; Earley, Kevin; Bros-Seemann, Shannon M.	Estimating relative distribution of raccoons, opossums, skunks, and foxes using animal control data.	NA	NA	Sampling points are not on verges (exposure)
WOS_15899	WOS	10.1016/j.foreco.2008.04.043	2008	Kluber, Matthew R.; Olson, Deanna H.; Puettmann, Klaus J.	Amphibian distributions in riparian and upslope areas and their habitat associations on managed forest landscapes in the Oregon Coast Range	NA	Forest Ecology and Management	The document meets exclusion criteria for waterways
ACTU_WOS_F_1260	WOS	10.1111/eff.12270	2017	Kluender, ER; Adams, R; Lewis, L	Seasonal habitat use of alligator gar in a river-floodplain ecosystem at multiple spatial scales	NA	NA	The document meets previous screening exclusion criteria (Population)
ACTU_WOS_F_2305	WOS	10.1016/j.jaridenv.2016.03.009	2016	Kluever, BM; Gese, EM	Spatial response of coyotes to removal of water availability at anthropogenic water sites	NA	NA	Sites are not in the bioclimatic region
ZR_14179	ZR	NA	2015	Kluever, Bryan M.; Gese, Eric M.; Dempsey, Steven J.	The influence of road characteristics and species on detection probabilities of carnivore faeces.	NA	NA	Sites are not in the bioclimatic region
ZR_14181	ZR	NA	1996	Kminiak, Milan	Faunistic notes on small mammals fauna in the region of Oravska Magura mountains (subregion Kubinska hol'a, northern Slovakia).	NA	NA	Pdf cannot be obtained
ZR_4710	ZR	NA	2014	Kneis, Peter	Dynamics of the breeding-bird community of an alluvial forest monitored over 40 years.	NA	NA	Pdf cannot be obtained
ZR_14184	ZR	NA	2011	Knick, Steven T.; Hanser, Steven E.; Miller, Richard F.; Pyke, David A.; Wisdom, Michael J.; Finn, Sean P.; Rinkes, E. Thomas; Henny, Charles J.	Ecological Influence and Pathways of Land Use in Sagebrush.	NA	NA	The study type is inappropriate (no data, simulation, recommendation)
WOS_15916	WOS	NA	1999	Knight, R. L.; Camp, R. J.; Boarman, W. I.; Knight, H. A. L.	Predatory bird populations in the east Mojave Desert, California	NA	Great Basin Naturalist	Sites are not in the bioclimatic region
WOS_15917	WOS	10.2307/3809423	1993	KNIGHT, RL; KAWASHIMA, JY	RESPONSES OF RAVEN AND RED-TAILED HAWK POPULATIONS TO LINEAR RIGHT-OF-WAYS	NA	Journal of Wildlife Management	Sites are not in the bioclimatic region
WOS_15920	WOS	10.1002/jwmg.677	2014	Kniowski, Andrew B.; Gehrt, Stanley D.	Home Range and Habitat Selection of the Indiana Bat in an Agricultural Landscape	NA	Journal of Wildlife Management	The document meets exclusion criteria for waterways
WOS_15930	WOS	NA	2011	Knoot, Tricia G.; Best, Louis B.	A MULTISCALE APPROACH TO UNDERSTANDING SNAKE USE OF CONSERVATION BUFFER STRIPS IN AN AGRICULTURAL LANDSCAPE	NA	Herpetological Conservation and Biology	Sites are not in the bioclimatic region
ZR_4723	ZR	10.2307/3801235	1988	Knopf, F. L.; Sedgwick, J. A.; Cannon, R. W.	Guild structure of a riparian avifauna relative to seasonal cattle grazing.	NA	NA	Sites are not in the bioclimatic region
WOS_15931	WOS	10.1046/j.1523-1739.1994.08030669.x	1994	KNOPF, FL; SAMSON, FB	SCALE PERSPECTIVES ON AVIAN DIVERSITY IN WESTERN RIPARIAN ECOSYSTEMS	NA	Conservation Biology	The document is a review
WOS_15932	WOS	10.2307/1369258	1992	KNOPF, FL; SEDGWICK, JA	AN EXPERIMENTAL-STUDY OF NEST-SITE SELECTION BY YELLOW WARBLERS	NA	Condor	Sites are not in the bioclimatic region
WOS_15933	WOS	10.1676/10-023.1	2010	Knopf, Fritz L.	Composition Dynamics of an Avian Assemblage	NA	Wilson Journal of Ornithology	Sites are not in the bioclimatic region
WOS_15934	WOS	10.1016/j.biocon.2014.07.017	2014	Knopff, Aliah Adams; Knopff, Kyle H.; Boyce, Mark S.; St Clair, Colleen Cassady	Flexible habitat selection by cougars in response to anthropogenic development	NA	Biological Conservation	Sites are not in the bioclimatic region
ACTU_WOS_F_1664	WOS	10.1177/1940082917692800	2017	Knowlton, JL; Phifer, CC; Cerqueira, PV; Barro, FD; Oliveira, SL; Fiser, CM; Becker, NM; Cardoso, MR; Flaspohler, DJ; Santos, MPD	Oil Palm Plantations Affect Movement Behavior of a Key Member of Mixed-Species Flocks of Forest Birds in Amazonia, Brazil	NA	NA	Sites are not in the bioclimatic region
WOS_15942	WOS	NA	2005	Knutson, M. G.; McColl, L. E.; Suarez, S. A.	Breeding bird assemblages associated with stages of forest succession in large river floodplains	NA	Natural Areas Journal	The document meets previous screening exclusion criteria (Exposure)
ACTU_WOS_T_11765	WOS	NA	2015	Kociolek, A; Grilo, C; Jacobson, S	FLIGHT DOESN'T SOLVE EVERYTHING: MITIGATION OF ROAD IMPACTS ON BIRDS	NA	NA	The document is a review
ZR_14206	ZR	NA	2008	Koehler, Dieter	Observations about urbanisation of the brown hare (Lepus europaeus) in Berlin, an example of its adaptability.	NA	NA	Pdf cannot be obtained
ZR_14223	ZR	10.2192/1537-6176(2008)19[80:NOABBD]2.0.CO;2	2008	Koike, Shinsuke; Hazumi, Toshihiro	Notes on Asiatic black bears denning habits in the Misaka Mountains, central Japan.	NA	NA	Sites are not in the bioclimatic region
ZR_14234	ZR	NA	2002	Kollmann, R.; Neumann, T.; Struwe-Juhl, B.	Population and conservation of the white-tailed eagle (Haliaeetus albicilla) in Germany and neighbouring countries.	NA	NA	Pdf cannot be obtained
ZR_4777	ZR	NA	2014	Komposch, B.	Distribution and population size of the European Beaver (Castor fiber LINNAEUS, 1758) in Styria (Austria).	NA	NA	Language is not English or French
WOS_16088	WOS	10.1127/0340-269X/2002/0032-0665	2002	Kondo, T.; Nakagoshi, N.	Effect of forest structure and connectivity on bird distribution in a riparian landscape	NA	Phytocoenologia	The document meets previous screening exclusion criteria (Exposure)
ACTU_WOS_F_3492	WOS	10.1111/btp.12248	2015	Konopik, O; Steffan-Dewenter, I; Grafe, TU	Effects of Logging and Oil Palm Expansion on Stream Frog Communities on Borneo, Southeast Asia	NA	NA	Sites are not in the bioclimatic region
WOS_16122	WOS	10.1017/S0266467413000795	2014	Konopik, Oliver; Linsenmair, Karl-Eduard; Grafe, T. Ulmar	Road construction enables establishment of a novel predator category to resident anuran community: a case study from a primary lowland Bornean rain forest	NA	Journal of Tropical Ecology	Sites are not in the bioclimatic region
WOS_16151	WOS	10.1007/s10980-009-9375-3	2009	Koper, Nicola; Walker, David J.; Champagne, Janessa	Nonlinear effects of distance to habitat edge on Sprague's pipits in southern Alberta, Canada	NA	Landscape Ecology	Sites are not in the bioclimatic region
EM_267	GREY_LITT_email_request	NA	2013	Korte, Allison Christine	Apparent Movements of Birds Within an Urban Riparian Corridor During the Breeding Season	NA	NA	The comparator is inappropriate
ZR_14265	ZR	NA	2007	Kosa, Ferenc; Papp, Tamas	Distribution, population size and dynamics of the white stork (Ciconia ciconia L.) in the Hartibaciu river basin (Transylvania, Romania).	NA	NA	Sites are not in the bioclimatic region
WOS_16222	WOS	10.1002/jwmg.578	2013	Kouffeld, Meadow J.; Larson, Michael A.; Gutierrez, R. J.	Selection of Landscapes by Male Ruffed Grouse During Peak Abundance	NA	Journal of Wildlife Management	Sites are not in the bioclimatic region
WOS_16241	WOS	10.1670/12-090	2014	Kovar, Roman; Brabec, Marek; Vita, Radovan; Bocek, Radomir	Mortality Rate and Activity Patterns of an Aesculapian Snake (Zamenis longissimus) Population Divided by a Busy Road	NA	Journal of Herpetology	The comparator is inappropriate
ZR_14298	ZR	10.2307/3670921	1979	Kozel, R. M.; Fleharty, E. D.	Movements of rodents across roads.	NA	NA	Sampling points are not on verges (exposure)
ZR_14299	ZR	NA	1984	Kozlov, A. N.	Colonization of north Kazakhstan by Rattus norvegicus.	NA	NA	Sites are not in the bioclimatic region
ZR_4834	ZR	NA	2010	Krausman, Paul R.; Bucci, Melanie	Mule deer associations with the All American Canal, eastern California, USA.	NA	NA	Sites are not in the bioclimatic region
ACTU_WOS_T_1748	WOS	10.1016/j.mambio.2017.05.003	2017	Krofel, M; Hocevar, L; Allen, ML	Does human infrastructure shape scent marking in a solitary felid?	NA	NA	The document meets previous screening exclusion criteria (Exposure)
WOS_16407	WOS	10.1016/j.foreco.2008.03.005	2008	Kroll, Andrew J.; Risenhoover, Ken; McBride, Tim; Beach, Eric; Kernohan, Brian J.; Light, Jeff; Bach, Janette	Factors influencing stream occupancy and detection probability parameters of stream-associated amphibians in commercial forests of Oregon and Washington, USA	NA	Forest Ecology and Management	The document meets exclusion criteria for waterways
ZR_14347	ZR	10.2307/3801173	1984	Kroodsma, R. L.	Ecological factors associated with degree of edge effect on breeding birds.	NA	NA	Pdf cannot be obtained
ZR_14348	ZR	NA	1984	Kroodsma, R. L.	Effect of edge on breeding forest bird species.	NA	NA	Sampling points are not on verges (exposure)
WOS_16414	WOS	10.1016/0006-3207(82)90032-5	1982	KROODSMA, RL	BIRD COMMUNITY ECOLOGY ON POWER-LINE CORRIDORS IN EAST TENNESSEE	NA	Biological Conservation	The comparator is inappropriate
WOS_16415	WOS	10.2307/2403473	1982	KROODSMA, RL	EDGE EFFECT ON BREEDING FOREST BIRDS ALONG A POWER-LINE CORRIDOR	NA	Journal of Applied Ecology	Sampling points are not on verges (exposure)
ACTU_WOS_F_2395	WOS	10.1016/j.agee.2016.03.043	2016	Kross, SM; Kelsey, TR; McColl, CJ; Townsend, JM	Field-scale habitat complexity enhances avian conservation and avian-mediated pest-control services in an intensive agricultural crop	NA	NA	The document meets previous screening exclusion criteria (Exposure)
WOS_16426	WOS	10.1046/j.1523-1739.2003.01546.x	2003	Krueper, D.; Bart, J.; Rich, T. D.	Response of vegetation and breeding birds to the removal of cattle on the San Pedro River, Arizona (USA)	NA	Conservation Biology	Sites are not in the bioclimatic region
ZR_4882	ZR	NA	2002	Kubel, Jacob E.; Derge, Katharine L.; Williams, Jennifer; Yahner, Richard H.	Amphibian and reptile inventory at Antietam National Battlefield, Maryland.	NA	NA	Pdf cannot be obtained
ZR_4884	ZR	NA	2001	Kucharski, Roman	Habitat selection and breeding ecology of the kingfisher Alcedo atthis in Bory Tucholskie in 1992-1998.	NA	NA	Pdf cannot be obtained
ZR_4885	ZR	NA	1994	Kucheruk, V. V.	Spreading of black rat in Russia: Siberia and Dalniy [Far] East.	NA	NA	Pdf cannot be obtained
ZR_4890	ZR	NA	2008	Kuehnis, Juergen B.; Schmocker, Hans	Increase of the common wall lizard (Podarcis muralis) in the Principality of Liechtenstein and the Swiss Alpine Rhine Valley.	NA	NA	Pdf cannot be obtained
WOS_16519	WOS	10.1007/s002679900105	1998	Kuitunen, M.; Rossi, E.; Stenroos, A.	Do highways influence density of land birds?	NA	Environmental Management	Sites are not in the bioclimatic region
WOS_16524	WOS	NA	2003	Kulba, B.; McGillivray, W. B.	Distribution and habitat characteristics of the Willow Flycatcher (Empidonax traillii) in Alberta	NA	NA	Sites are not in the bioclimatic region
WOS_16589	WOS	10.1139/cjz-78-1-150	2000	Kunkel, K. E.; Pletscher, D. H.	Habitat factors affecting vulnerability of moose to predation by wolves in southeastern British Columbia	NA	Canadian Journal of Zoology-Revue Canadienne De Zoologie	Sites are not in the bioclimatic region
ACTU_WOS_T_919	WOS	10.1111/jzo.12504	2018	Kushata, JNT; Periquet, S; Tarakini, T; Muzamba, M; Mafuwa, B; Loveridge, AJ; Macdonald, DW; Fritz, H; Valeix, M	Drivers of diurnal rest site selection by spotted hyaenas	NA	NA	Sites are not in the bioclimatic region
WOS_16673	WOS	10.1894/CLG-33.1	2011	Kuykendall, M. Todd; Keller, Gregory S.	IMPACTS OF ROADS AND CORRIDORS ON ABUNDANCE AND MOVEMENT OF SMALL MAMMALS ON THE LLANO ESTACADO OF TEXAS	NA	Southwestern Naturalist	Sites are not in the bioclimatic region
WOS_16674	WOS	NA	2013	Kuzmin, S. L.	ON THE SOUTHERN DISTRIBUTION LIMIT OF SIBERIAN FROG (Rana amurensis) IN MONGOLIA	NA	Russian Journal of Herpetology	Sites are not in the bioclimatic region
EM_269	GREY_LITT_email_request	NA	2008	L. Lafontaine	4ème rencontre "Routes et faune sauvage". Infrastructures de transport et petite faune.	NA	NA	The study type is inappropriate (no data, simulation, recommendation)
WOS_16728	WOS	NA	2009	Labutin, Yu V.; Egorov, N. N.; Isaev, A. P.	DISTRIBUTION OF OSPREY (PANDION HALIAETUS) IN YAKUTIA	NA	Zoologichesky Zhurnal	Pdf cannot be obtained
ZR_14427	ZR	NA	2012	Lackey, Melissa A.; Morrison, Michael L.; Loman, Zachary G.; Collier, Bret A.; Wilkins, R. Neal	Experimental Determination of the Response of Golden-Cheeked Warblers (Setophaga chrysoparia) to Road Construction Noise.	NA	NA	The document meets previous screening exclusion criteria (Outcome)
ZR_4957	ZR	NA	1983	Lacki, M. J.; Bookhout, T. A.	A survey of bats in Wayne National Forest, Ohio.	NA	NA	The comparator is inappropriate
ZR_4958	ZR	10.1007/s11273-004-0774-6	2004	Lacki, M. J.; Fitzgerald, J. L.; Hummer, J. W.	Changes in avian species composition following surface mining and reclamation along a riparian forest corridor in southern Indiana.	NA	NA	The document meets exclusion criteria for waterways
ZR_4953	ZR	NA	2011	Lacki, Michael J.; Dodd, Luke E.	DIET AND FORAGING BEHAVIOR OF CORYNORHINUS IN EASTERN NORTH AMERICA.	NA	NA	The document meets previous screening exclusion criteria (Exposure)
ACTU_WOS_F_122	WOS	10.1016/j.actao.2018.03.004	2018	Lacko, J; Topercer, J; Sul'ovsky, M	How disturbances and management practices affect bird communities in a Carpathian river ecosystem?	NA	NA	The comparator is inappropriate
WOS_16744	WOS	10.1644/07-MAMM-A-080R.1	2008	Lada, Hania; Mac Nally, Ralph; Taylor, Andrea C.	Responses of a carnivorous marsupial (Antechinus flavipes) to local habitat factors in two forest types	NA	Journal of Mammalogy	The document meets previous screening exclusion criteria (Exposure)
WOS_16745	WOS	10.1016/j.biocon.2006.09.003	2007	Lada, Hania; Thomson, James R.; Mac Nally, Ralph; Horrocks, Greg; Taylor, Andrea C.	Evaluating simultaneous impacts of three anthropogenic effects on a floodplain-dwelling marsupial Antechinus flavipes	NA	Biological Conservation	Sites are not in the bioclimatic region
ZR_4965	ZR	NA	2004	Ladurner, Eva	The river banks of the Adige between Merano and Salorno (South Tyrol, Italy): a suitable habitat for small mammals?	NA	NA	Language is not English or French
ZR_4964	ZR	NA	2001	Ladurner, Eva; Mueller, Juerg Paul	Small mammals in the Vinschgau Valley (South Tyrol, Italy): Diversity, vertical distribution, communities.	NA	NA	Language is not English or French
ZR_4973	ZR	NA	2004	Lajmanovich, Rafael C.; Peltzer, Paola M.	Contribute to the knowledgement of amphibian anura with distribution in Santa Fe and Entre Rios Provinces (biology, diversity, ecotoxicology and conservation).	NA	NA	Language is not English or French
ACTU_WOS_T_240	WOS	10.1111/1365-2664.13056	2018	Lamb, CT; Mowat, G; Reid, A; Smit, L; Proctor, M; McLellan, BN; Nielsen, SE; Boutin, S	Effects of habitat quality and access management on the density of a recovering grizzly bear population	NA	NA	Sites are not in the bioclimatic region
WOS_16838	WOS	NA	2000	Lambert, J. D.; Hannon, S. J.	Short-term effects of timber harvest on abundance territory characteristics, and pairing success of Ovenbirds in riparian buffer strips	NA	Auk	Sites are not in the bioclimatic region
WOS_16844	WOS	NA	2014	Lambert, Thomas D.; Sumpter, Kenton L.; Dittel, Jacob W.; Dupre, Samuel; Casanova, Kendra; Winker, Ashley; Adler, Gregory H.	Roads as barriers to seed dispersal by small mammals in a neotropical forest	NA	Tropical Ecology	Sites are not in the bioclimatic region
WOS_16860	WOS	10.2193/2005-752	2007	Lammers, Wendy M.; Collopy, Michael W.	Effectiveness of avian predator perch deterrents on electric transmission lines	NA	Journal of Wildlife Management	Sites are not in the bioclimatic region
WOS_16879	WOS	10.1002/ird.274	2006	Lamsodis, Romanas; Morkunas, Vytautas; Poskus, Vaclovas; Povilaitis, Arvydas	Ecological approach to management of open drains	NA	Irrigation and Drainage	Sites are not in the bioclimatic region
ZR_5013	ZR	NA	2007	Landmann, Armin	Population dynamics and space use of amphibians and birds in floodplains of the Tyrolean Lech, Austria: influences of river dynamics, river regulation and river restoration.	NA	NA	Language is not English or French
ZR_14462	ZR	10.2307/3627870	1999	Langley, William	Perch and habitat use by red-tailed hawks and American kestrels along a highway in eastern Kansas.	NA	NA	Sampling points are not on verges (exposure)
WOS_16949	WOS	NA	2002	Lanham, J. D.; Simmons, J. E.	Evaluation of wildlife habitat suitability in an herbicide-treated utility right-of-way	NA	NA	Pdf cannot be obtained
ZR_5035	ZR	NA	2011	Lapini, Luca; Conte, Daniele; Zupan, Marko; Kozlan, Letizia	ITALIAN JACKALS 1984-2011: AN UPDATED REVIEW (CANIS AUREUS: CARNIVORA, CANIDAE).	NA	NA	The document is a review
ACTU_ZR_F_376	ZR	NA	2017	Laposi, Alexandru; Ardelean, Aurel; Ardelean, Gavril; Ardelean, Doru	ORNITHOLOGICAL OBSERVATIONS ON THE MIDDLE COURSE OF THE RIVER SOMES - TAXONOMIC AND ECOLOGICAL CONSIDERATIONS (TAXONOMIC AND ECOLOGICAL ASPECTS OF THE SOMES RIVER MIDDLE COURSE ORNITOFAUNA).	NA	NA	Sites are not in the bioclimatic region
WOS_16982	WOS	10.1642/0004-8038(2001)118[0432:ARTRNS]2.0.CO;2	2001	Larison, B.; Laymon, S. A.; Williams, P. L.; Smith, T. B.	Avian responses to restoration: Nest-site selection and reproductive success in song sparrows	NA	Auk	Sites are not in the bioclimatic region
WOS_16996	WOS	10.3398/1527-0904(2007)67[538:CBURC]2.0.CO;2	2007	Larrucea, Eveline S.; Serra, Gianluca; Jaeger, Michael N.; Barrett, Reginald H.	Censusing bobcats using remote cameras	NA	Western North American Naturalist	The document meets previous screening exclusion criteria (Exposure)
WOS_17003	WOS	10.1023/A:1008127702944	2000	Larsen, J. K.; Madsen, J.	Effects of wind turbines and other physical elements on field utilization by pink-footed geese (Anser brachyrhynchus): A landscape perspective	NA	Landscape Ecology	The study type is inappropriate (no data, simulation, recommendation)
ACTU_WOS_F_3643	WOS	10.1007/s00027-014-0390-3	2015	Larsen, S; Scalici, M; Tancioni, L	Scale dependent biodiversity patterns in Mediterranean river catchments: a multi taxa approach	NA	NA	The comparator is inappropriate
WOS_17011	WOS	10.1007/s00267-009-9419-0	2010	Larsen, Stefano; Sorace, Alberto; Mancini, Laura	Riparian Bird Communities as Indicators of Human Impacts Along Mediterranean Streams	NA	Environmental Management	The document meets exclusion criteria for waterways
ACTU_WOS_F_1996	WOS	10.1111/1365-2664.12692	2016	Larson, DM; Dodds, WK; Whiles, MR; Fulgoni, JN; Thompson, TR	A before-and-after assessment of patch-burn grazing and riparian fencing along headwater streams	NA	NA	The document meets previous screening exclusion criteria (Outcome)
ACTU_WOS_F_1328	WOS	10.1111/asj.12670	2017	Larson, L; Johnson, DE; Wilson, M; Wilson, K; Louhaichi, M; Williams, J	Spatial occupancy patterns and activity of arid rangeland cattle grazing small riparian pastures	NA	NA	The comparator is inappropriate
WOS_17032	WOS	10.1016/j.ecolmodel.2007.10.036	2008	LaRue, Michelle A.; Nielsen, Clayton K.	Modelling potential dispersal corridors for cougars in midwestern North America using least-cost path methods	NA	Ecological Modelling	The study type is inappropriate (no data, simulation, recommendation)
WOS_17034	WOS	10.1139/x95-063	1995	LARUE, P.; BELANGER, L.; HUOT, J.	RIPARIAN EDGE EFFECTS ON BOREL BALSAM FIR BIRD COMMUNITIES	NA	Canadian Journal of Forest Research-Revue Canadienne De Recherche Forestiere	Sites are not in the bioclimatic region
WOS_17035	WOS	NA	1994	Larue, Pierre; Belanger, Louis; Huot, Jean	Amounts of white-tailed deer in winter: selection of site or pure coincidence?	NA	Ecoscience	Sites are not in the bioclimatic region
WOS_17048	WOS	NA	2008	Lassau, Scott A.; Ryan, Brendan; Close, Robert; Moon, Chris; Geraghty, Pascal; Coyle, Ann; Pile, John	Home ranges and mortality of a roadside Koala Phascolarctos cinereus population at Bonville, New South Wales	NA	NA	The comparator is inappropriate
WOS_17057	WOS	10.1371/journal.pone.0027794	2011	Latch, Emily K.; Boarman, William I.; Walde, Andrew; Fleischer, Robert C.	Fine-Scale Analysis Reveals Cryptic Landscape Genetic Structure in Desert Tortoises	NA	Plos One	Sites are not in the bioclimatic region
WOS_17060	WOS	NA	2012	Latif, Quresh S.; Heath, Sacha K.; Ballard, Grant	THE NEST PREDATOR ASSEMBLAGE FOR SONGBIRDS IN MONO LAKE BASIN RIPARIAN HABITATS	NA	Western North American Naturalist	The document meets exclusion criteria for waterways
ACTU_WOS_F_1148	WOS	10.1016/j.biocon.2017.02.017	2017	Lau, A; Karraker, NE; Martelli, P; Dudgeon, D	Delineation of core terrestrial habitat for conservation of a tropical salamander: The Hong Kong newt (Paramesotriton hongkongensis)	NA	NA	Sites are not in the bioclimatic region
WOS_17089	WOS	10.1016/j.scitotenv.2010.10.034	2011	Laura Miserendino, Maria; Casaux, Ricardo; Archangelsky, Miguel; Yanina Di Prinzio, Cecilia; Brand, Cecilia; Mabel Kutschker, Adriana	Assessing land-use effects on water quality, in-stream habitat, riparian ecosystems and biodiversity in Patagonian northwest streams	NA	Science of the Total Environment	The document meets exclusion criteria for waterways
WOS_17090	WOS	10.1890/03-5194	2004	Laurance, S. G. W.	Responses of understory rain forest birds to road edges in Central Amazonia	NA	Ecological Applications	Sites are not in the bioclimatic region
WOS_17092	WOS	10.1111/j.1523-1739.2004.00268.x	2004	Laurance, S. G. W.; Stouffer, P. C.; Laurance, W. E.	Effects of road clearings on movement patterns of understory rainforest birds in central Amazonia	NA	Conservation Biology	Sites are not in the bioclimatic region
WOS_17110	WOS	10.2193/2007-504	2008	Laurian, Catherine; Dussault, Christian; Ouellet, Jean-Pierre; Courtois, Rehaume; Poulin, Marius; Breton, Laurier	Behavioral adaptations of moose to roadside salt pools,\	NA	Journal of Wildlife Management	Sites are not in the bioclimatic region
ZR_14515	ZR	NA	2014	Lauss, Julia; Maletzky, Andreas	The yellow bellied toad (Bombina variegata) in the special area of conservation Untersberg-Vorland (Salzburg, Austria): distribution, habitats, populations size and movements.	NA	NA	Pdf cannot be obtained
WOS_17119	WOS	NA	2002	Lauzon, R. D.; Grindal, S. D.; Hornbeck, G. E.	Ground squirrel re-colonization of a pipeline right-of-way in southern Alberta	NA	NA	Pdf cannot be obtained (and sites are not in the temperate bioclimatic region)
ACTU_ZR_F_725	ZR	NA	2016	Lavariega, Mario C.; Briones-Salas, Miguel	Notes on bat movements in a fragmented landscape in the Tehuantepec Isthmus, Mexico.	NA	NA	Language is not English or French
WOS_17136	WOS	10.1071/WR00058	2001	Law, B. S.	The diet of the common blossom bat (Syconycteris australis) in upland tropical rainforest and the importance of riparian areas	NA	Wildlife Research	The document meets exclusion criteria for waterways
WOS_17137	WOS	10.1046/j.1442-9993.2000.01046.x	2000	Law, B. S.; Anderson, J.	Roost preferences and foraging ranges of the eastern forest bat Vespadelus pumilus under two disturbance histories in northern New South Wales, Australia	NA	Austral Ecology	The document meets exclusion criteria for waterways
WOS_17139	WOS	10.1071/WR03001	2004	Law, B. S.; Chidel, M.	Roosting and foraging ecology of the golden-tipped bat (Kerivoula papuensis) on the south coast of New South Wales	NA	Wildlife Research	The document meets exclusion criteria for waterways
WOS_17140	WOS	10.1046/j.1365-2664.2002.00739.x	2002	Law, B.; Chidel, M.	Tracks and riparian zones facilitate the use of Australian regrowth forest by insectivorous bats	NA	Journal of Applied Ecology	The document meets exclusion criteria for waterways
ACTU_WOS_F_849	WOS	10.1016/j.foreco.2017.05.022	2017	Law, BS; Chidel, M; Brassil, T; Turner, G; Gonsalves, L	Winners and losers among mammals and nocturnal birds over 17 years in response to large-scale eucalypt plantation establishment on farmland	NA	NA	The document meets exclusion criteria for waterways
ZR_5101	ZR	10.2307/3670775	1984	Lawhead, D. N.	Bobcat Lynx rufus home range, density and habitat preference in south-central Arizona.	NA	NA	Sites are not in the bioclimatic region
ZR_14521	ZR	NA	2011	Lawicki, Lukasz; Panagiotopoulou, Hanna; Zmihorski, Michal	The occurrence of the smooth snake Coronella austriaca in the Lower Odra River Valley (NW Poland).	NA	NA	Language is not English or French
WOS_17160	WOS	NA	2014	Lawrence, David J.; Stewart-Koster, Ben; Olden, Julian D.; Ruesch, Aaron S.; Torgersen, Christian E.; Lawler, Joshua J.; Butcher, Don P.; Crown, Julia K.	The interactive effects of climate change, riparian management, and a nonnative predator on stream-rearing salmon	NA	Ecological Applications	The study type is inappropriate (no data, simulation, recommendation)
WOS_17167	WOS	10.1656/058.010.0210	2011	Lawson, Ardath L.; Morrison, Michael L.; Slack, R. Douglas	Impacts of Oil and Gas Development on Wintering Grassland Birds at Padre Island National Seashore, Texas	NA	Southeastern Naturalist	The document meets previous screening exclusion criteria (Exposure)
WOS_17174	WOS	10.2307/5446	1991	LAWTON, JH; WOODROFFE, GL	HABITAT AND THE DISTRIBUTION OF WATER VOLES - WHY ARE THERE GAPS IN A SPECIES RANGE	NA	Journal of Animal Ecology	Results are in an unexploitable format
EM_277	GREY_LITT_email_request	NA	2011	Le Bris, Caroline	Gestion des dépendances routières et bordures de champs à l'échelle de la région Centre	NA	NA	The study type is inappropriate (no data, simulation, recommendation)
ZR_5153	ZR	NA	2008	Le Fer, Danielle; Fraser, James D.; Kruse, Casey D.	Piping plover foraging-site selection on the Missouri River.	NA	NA	Sites are not in the bioclimatic region
WOS_17203	WOS	10.1016/j.ecoleng.2012.06.031	2012	Le Viol, Isabelle; Chiron, Francois; Julliard, Romain; Kerbiriou, Christian	More amphibians than expected in highway stormwater ponds	NA	Ecological Engineering	Sampling points are not on verges (exposure)
ZR_5117	ZR	NA	2003	Lea, Jerry M.; Politano, Edoardo; Luiselli, Luca	Changes in the herpetofauna of a fresh water river in Southern Nigeria, after 20 years of development.	NA	NA	Sites are not in the bioclimatic region
ACTU_ZR_F_891	ZR	NA	2016	Leal Valls, Fernanda Caminha; Rossi, Liana Chesini; Barcellos dos Santos, Marcelo Fischer; Petry, Maria Virginia	COMPARATIVE ANALYSIS OF BIRD COMMUNITY IN ATLANTIC FOREST AREAS IN SOUTHERN BRAZIL.	NA	NA	Language is not English or French
ACTU_WOS_F_2510	WOS	10.1016/j.jnc.2016.02.0011617	2016	Leal, AI; Rainho, A; Martins, RC; Granadeiro, JP; Palmeirim, JM	Modelling future scenarios to improve woodland landscapes for birds in the Mediterranean	NA	NA	The document meets exclusion criteria for waterways
ZR_14545	ZR	NA	2006	Leblanc, Yves; Martel, Donald; Bolduc, Francois	Upgrading a 144-km section of highway in prime moose habitat: where, why, and how to reduce moose-vehicle collisions?	NA	NA	Sites are not in the bioclimatic region
WOS_17251	WOS	10.2193/2006-375	2007	Leblond, Mathieu; Dussault, Christian; Ouellet, Jean-Pierre; Poulin, Marius; Courtois, Rehaume; Fortin, Jacques	Electric fencing as a measure to reduce moose-vehicle collisions	NA	Journal of Wildlife Management	Sites are not in the bioclimatic region
WOS_17252	WOS	10.2193/2006-459	2007	Leblond, Mathieu; Dussault, Christian; Ouellet, Jean-Pierre; Poulin, Marius; Courtois, Rehaume; Fortin, Jacques	Management of roadside salt pools to reduce moose-vehicle collisions	NA	Journal of Wildlife Management	Sites are not in the bioclimatic region
ACTU_WOS_F_3607	WOS	10.1016/j.jaridenv.2015.04.001	2015	Lee, MB; Rotenberry, JT	Effects of land use on riparian birds in a semiarid region	NA	NA	Results are in an unexploitable format
WOS_17407	WOS	10.1111/j.1523-1739.2007.00870.x	2008	Lees, Alexander C.; Peres, Carlos A.	Conservation value of remnant riparian forest corridors of varying quality for Amazonian birds and mammals	NA	Conservation Biology	Sites are not in the bioclimatic region
ACTU_WOS_T_3111	WOS	10.1071/WR14239	2017	LeGros, DL; Steinberg, B; Lesbarreres, D	Middle of the road: enhanced habitat for salamanders on unused logging roads	NA	NA	Sites are not in the bioclimatic region
ACTU_WOS_T_7174	WOS	10.1002/jwmg.1017	2016	Lehman, CP; Rumble, MA; Rota, CT; Bird, BJ; Fogarty, DT; Millspaugh, JJ	Elk Resource Selection at Parturition Sites, Black Hills, South Dakota	NA	NA	Sites are not in the bioclimatic region
WOS_17448	WOS	10.2193/2007-004	2007	Lehmkuhl, John F.; Burger, E. Dorsey; Drew, Emily K.; Lindsey, John P.; Haggard, Maryellen; Woodruff, Kent Z.	Breeding birds in riparian and upland dry forests of the cascade range	NA	Journal of Wildlife Management	Results are in an unexploitable format
WOS_17450	WOS	10.3955/0029-344X-82.2.94	2008	Lehmkuhl, John F.; Peffer, Roger D.; O'Connell, Margaret A.	Riparian and upland small mammals on the east slope of the cascade range, Washington	NA	Northwest Science	The document meets exclusion criteria for waterways
WOS_17469	WOS	10.5268/IW-3.4.620	2013	Leigh, Catherine; Reis, Terence M.; Sheldon, Fran	High potential subsidy of dry-season aquatic fauna to consumers in riparian zones of wet-dry tropical rivers	NA	Inland Waters	Sites are not in the bioclimatic region
ACTU_WOS_F_52	WOS	10.7717/peerj.4617	2018	Leite, GA; Farias, IP; Goncalves, ALS; Hawes, JE; Peres, CA	Coarse- and fine-scale patterns of distribution and habitat selection places an Amazonian floodplain curassow in double jeopardy	NA	NA	Sites are not in the bioclimatic region
ZR_5177	ZR	NA	2000	Lekuona, Jesus Mari	[Factors affecting the winter roost distribution of the cormorant (Phalacrocorax carbo sinensis) around the rivers of the north of Spain.]	NA	NA	Pdf cannot be obtained
ZR_14615	ZR	NA	2012	Lentini, Pia E.; Gibbons, Philip; Fischer, Joern; Law, Brad; Hanspach, Jan; Martin, Tara G.	Bats in a Farming Landscape Benefit from Linear Remnants and Unimproved Pastures.	NA	NA	The document meets exclusion criteria for waterways
ZR_5186	ZR	NA	1998	Lentner, Reinhard	Bird communities of the riverine forest near Silz (Northern Tyrol, Austria): ecological groups, habitat structure and avifaunistic worth.	NA	NA	Language is not English or French
ZR_14617	ZR	NA	2011	Lenz, Sigrid; Schmidt, Almuth	[Results of a state wide project on the promotion of the dice snake population and its habitats.]	NA	NA	Language is not English or French
WOS_17595	WOS	NA	2004	Lesica, P.; Miles, S.	Beavers indirectly enhance the growth of Russian olive and tamarisk along eastern Montana Rivers	NA	Western North American Naturalist	Sites are not in the bioclimatic region
EM_291	GREY_LITT_email_request	NA	2011	Lesigne, Jean-François	Trames vertes et bleues et ouvrages électriques	NA	NA	The type of document is not appropriate
WOS_17602	WOS	NA	2011	Lesinski, Grzegorz; Olszewski, Adam; Popczyk, Bartlomiej	FOREST ROADS USED BY COMMUTING AND FORAGING BATS IN EDGE AND INTERIOR ZONES	NA	Polish Journal of Ecology	The comparator is inappropriate
WOS_17603	WOS	10.1007/s10344-010-0414-9	2011	Lesinski, Grzegorz; Sikora, Anna; Olszewski, Adam	Bat casualties on a road crossing a mosaic landscape	NA	European Journal of Wildlife Research	The document meets previous screening exclusion criteria (Outcome)
ZR_5207	ZR	NA	2011	Leso, Peter; Kropil, Rudolf	Bird assemblages of habitats around the middle part of the Hron River.	NA	NA	Language is not English or French
ZR_5211	ZR	NA	2014	Lessa, Leonardo Guimaraes; Paula, Camilla de Souza	Community structure of small mammals in an area of riparian savanna in Parque Estadual do Rio Preto, Minas Gerais, Brazil.	NA	NA	Language is not English or French
ZR_5213	ZR	NA	2014	Lester, Michael B.; van Riper, Charles	The distribution and extent of heavy metal accumulation in song sparrows along Arizona's upper Santa Cruz River.	NA	NA	Sites are not in the bioclimatic region
ACTU_WOS_T_1508	WOS	10.5751/ACE-01049-120204	2017	Leston, LFV; Koper, N	Managing urban and rural rights-of-way as potential habitats for grassland birds	NA	NA	Sites are not in the bioclimatic region
ZR_5233	ZR	NA	2005	Lewis, B. D.; Rohweder, D. A.	Distribution, habitat, and conservation status of the giant barred frog Mixophyes iteratus in the Bungawalbin catchment, northeastern New South Wales.	NA	NA	The document meets exclusion criteria for waterways
ZR_5234	ZR	NA	2007	Lewis, Brett; Griffiths, Richard A.; Barrios, Yolanda	Field assessment of great crested newt Triturus cristatus mitigation projects in England.	NA	NA	The document meets previous screening exclusion criteria (Exposure)
ACTU_WOS_F_3554	WOS	10.1890/ES15-00137.1	2015	Lewis, DL; Baruch-Mordo, S; Wilson, KR; Breck, SW; Mao, JS; Broderick, J	Foraging ecology of black bears in urban environments: guidance for human-bear conflict mitigation	NA	NA	Sites are not in the bioclimatic region
ACTU_WOS_T_1474	WOS	NA	2017	Lewis, MB; Schupp, EW; Monaco, TA	ROAD DUST CORRELATED WITH DECREASED REPRODUCTION OF THE ENDANGERED UTAH SHRUB HESPERIDANTHUS SUFFRUTESCENS	NA	NA	Sites are not in the bioclimatic region
ZR_5239	ZR	10.2307/2426576	1994	Lewis, Susan E.	Night roosting ecology of pallid bats (Antrozous pallidus) in Oregon.	NA	NA	The document meets previous screening exclusion criteria (Exposure)
ACTU_ZR_T_31	ZR	NA	2018	Li Shuai; Zhang Xiang-feng; Shi Jian-bin; Dong Shi-kui; Gao Xiao-xia	Effects of highway from Inner Mongolia to Xinjiang on habitat suitability of ungulates in Alashan desert.	NA	NA	Language is not English or French
ACTU_WOS_T_174	WOS	10.1016/j.ufug.2018.03.017	2018	Li, B; Zhang, W; Shu, XX; Pei, EL; Yuan, X; Wang, TH; Wang, ZH	Influence of breeding habitat characteristics and landscape heterogeneity on anuran species richness and abundance in urban parks of Shanghai, China	NA	NA	The document meets previous screening exclusion criteria (Exposure)
ZR_14667	ZR	NA	2012	Li, Bin; Ma, Wu-chang; Chen, Jian-rong; Xue, Wei; Zhang, Ke; Luan, Xiao-feng	Influence of Highway Construction on Avian Community.	NA	NA	Language is not English or French
ZR_14674	ZR	NA	2010	Li, Hongqun; Lian, Zhenmin; Cungen, Chen	Wintering Habitat Selection by Brown-Eared Pheasant (Crossoptilon mantchuricum) in Huanglong Mountains Nature Reserve, Shaanxi Province, China.	NA	NA	Pdf cannot be obtained (and language is not English or French)
ZR_14679	ZR	NA	2006	Li, Wei; Zhou, Wei; Zhang, Xing-yong; Cao, Ming; Zhang, Ren-gong	Spring foraging sites of three pheasants at Nanhua part in Ailaoshan National Nature Reserve.	NA	NA	Language is not English or French
WOS_17838	WOS	10.1111/j.1061-2971.2004.00313.x	2004	Li, X. R.; Xiao, H. L.; Zhang, J. G.; Wang, X. P.	Long-term ecosystem effects of sand-binding vegetation in the Tengger Desert, northern China	NA	Restoration Ecology	Sites are not in the bioclimatic region
ZR_14683	ZR	NA	2008	Li, Yankuo; Zhang, Minghai; Jiang, Zhigang	Habitat selection by wapiti (Cervus elaphus xanthopygus) in Wandashan Mountains, China, based on habitat availability.	NA	NA	Sites are not in the bioclimatic region
WOS_17900	WOS	10.1016/j.trd.2010.07.004	2010	Li, Zhongqiu; Ge, Chen; Li, Jing; Li, Yankuo; Xu, Aichun; Zhou, Kexin; Xue, Dayuan	Ground-dwelling birds near the Qinghai-Tibet highway and railway	NA	Transportation Research Part D-Transport and Environment	Sites are not in the bioclimatic region
WOS_17947	WOS	NA	1997	Libois, R.	Seasonal diet and feeding tactics of the European otter (Lutra lutra) in Central France	NA	Vie Et Milieu-Life and Environment	The document meets previous screening exclusion criteria (Outcome)
ACTU_WOS_F_1389	WOS	10.1139/cjz-2016-0113	2017	Liford, AN; Cecala, KK	Does riparian disturbance alter stream amphibian antipredator behaviors?	NA	NA	The document meets previous screening exclusion criteria (Outcome)
ZR_14703	ZR	NA	1994	Ligtvoet, W.; van Wijngaarden, A.	The colonization of the Island of Noord-Beveland (The Netherlands) by the common vole Microtus arvalis, and its consequences for the root vole M. oeconomus.	NA	NA	Pdf cannot be obtained
ACTU_WOS_T_9640	WOS	10.3846/16486897.2015.1054290	2015	Lin, SC	THE WIDTH OF EDGE EFFECTS OF ROAD CONSTRUCTION ON FAUNA AND ECOLOGICALLY CRITICAL ROAD DENSITY	NA	NA	The document meets previous screening exclusion criteria (Exposure)
ZR_5286	ZR	NA	2002	Lind, Bo-Bertil; Stigh, Jimmy; Larsson, Lars	Sediment type and breeding strategy of the bank swallow Riparia riparia in western Sweden.	NA	NA	The document meets previous screening exclusion criteria (Exposure)
ZR_5300	ZR	NA	1989	Lingle, G. R.	Winter raptor use of the Platte and North Platte River Valleys in south central Nebraska.	NA	NA	Pdf cannot be obtained
WOS_18122	WOS	10.1007/s10980-005-0066-4	2005	Linke, J.; Franklin, S. E.; Huettmann, F.; Stenhouse, G. B.	Seismic cutlines, changing landscape metrics and grizzly bear landscape use in Alberta	NA	Landscape Ecology	Sites are not in the bioclimatic region
WOS_18132	WOS	10.3161/150811014X683282	2014	Lino, Ana; Fonseca, Carlos; Goiti, Urtzi; Ramos Pereira, Maria Joao	Prey selection by Rhinolophus hipposideros (Chiroptera, Rhinolophidae) in a modified forest in Southwest Europe	NA	Acta Chiropterologica	The document meets previous screening exclusion criteria (Exposure)
WOS_18144	WOS	10.1111/j.1752-1688.2001.tb03666.x	2001	Liquori, M.; Jackson, C. R.	Channel response from shrub dominated riparian communities and associated effects on salmonid habitat	NA	Journal of the American Water Resources Association	The document meets previous screening exclusion criteria (Outcome)
WOS_18169	WOS	10.1016/S0006-3207(02)00059-9	2002	Little, S. J.; Harcourt, R. G.; Clevenger, A. P.	Do wildlife passages act as prey-traps?	NA	Biological Conservation	The document is a review
ACTU_ZR_T_649	ZR	NA	2016	Lituma, Christopher M.; Buehler, David A.	Minimal bias in surveys of grassland birds from roadsides.	NA	NA	Results are in an unexploitable format
WOS_18175	WOS	10.2193/0091-7648(2006)34[1190:ARSTDT]2.0.CO;2	2006	Litvaitis, John A.; Tash, Jeffrey P.; Litvaitis, Marian K.; Marchand, Michael N.; Kovach, Adrienne I.; Innes, Robin	A range-wide survey to determine the current distribution of New England cottontails	NA	Wildlife Society Bulletin	The document meets previous screening exclusion criteria (Exposure)
WOS_18183	WOS	NA	2004	Litzgus, J. D.; Mousseau, T. A.	Home range and seasonal activity of southern spotted turtles (Clemmys guttata): Implications for managment	NA	Copeia	The document meets previous screening exclusion criteria (Exposure)
ACTU_ZR_T_196	ZR	NA	2017	Liu Lanmei; Liu Xuehua; Jin Xuelin; Wang Zhichen; Gong Minghao	Research on the change of giant pandas'spatial utilization and road impacts in the Qinling Mountains.	NA	NA	Language is not English or French
ACTU_ZR_T_781	ZR	NA	2016	Liu Peng; Dai Juan; Cao Dafan; Li Zhihong; Zhang Li	Habitat suitability assessment for Asian elephant in Pu'er prefecture in the Yunnan province of China.	NA	NA	Language is not English or French
WOS_18242	WOS	10.1007/s11783-010-0027-2	2010	Liu, Jie; Chen, Fan; Geng, Haiqing; Qiu, Xinxin; Cai, Binbin	Range of ecological impact of highway construction in the Longitudinal Range-Gorge Region, China	NA	Frontiers of Environmental Science & Engineering in China	Pdf cannot be obtained (and sites are not in the temperate bioclimatic region)
WOS_18252	WOS	NA	2012	Liu, Ming; Swanson, David	PLASMA METABOLITES SUGGEST SIMILAR STOPOVER HABITAT QUALITY FOR RIPARIAN CORRIDOR WOODLANDS AND ANTHROPOGENIC WOODLOTS IN THE NORTHERN PRAIRIE REGION	NA	Proceedings of the South Dakota Academy of Science, Vol 91	Pdf cannot be obtained
ZR_14755	ZR	NA	2008	Liu, Zhao; Zhou, Wei; Zhang, Rengong; Xie, Yichang; Huang, Qingwen; Wen, Yunyan	Foraging sites selection of green peafowl (Pavo muticus imperator) in different seasons in Shiyangjiang Valley of upper Yuanjiang drainage, Yunnan.	NA	NA	Language is not English or French
ZR_14757	ZR	10.2307/3809363	1990	Livingston, S. A.; Todd, C. S.; Krohn, W. B.; Owen, R. B.	Habitat models for nesting bald eagles in Maine.	NA	NA	Sites are not in the bioclimatic region
ACTU_ZR_T_794	ZR	NA	2016	Llaneza, Luis; Garcia, Emilio J.; Palacios, Vicente; Sazatornil, Victor; Vicente Lopez-Bao, Jose	Resting in risky environments: the importance of cover for wolves to cope with exposure risk in human-dominated landscapes.	NA	NA	The document meets previous screening exclusion criteria (Exposure)
WOS_18369	WOS	10.1016/0006-3207(93)90190-C	1993	LODE, T.	THE DECLINE OF OTTER LUTRA-LUTRA POPULATIONS IN THE REGION OF THE PAYS-DE-LOIRE, WESTERN FRANCE	NA	Biological Conservation	The comparator is inappropriate
ZR_14774	ZR	NA	2014	Loeb, Susan C.; Winters, Eric A.; Glaser, Marion E.; Snively, Marian L.; Laves, Kevin S.; Ilse, Jessica K.	OBSERVATIONS OF LITTLE BROWN MYOTIS (MYOTIS LUCIFUGUS) HABITAT ASSOCIATIONS AND ACTIVITY IN THE CHUGACH NATIONAL FOREST, ALASKA.	NA	NA	Sites are not in the bioclimatic region
ZR_5349	ZR	NA	2011	Loeb, Susan C.; Zarnoch, Stanley J.	SEASONAL AND MULTIANNUAL ROOST USE BY RAFINESQUE'S BIG-EARED BATS IN THE COASTAL PLAIN OF SOUTH CAROLINA.	NA	NA	The document meets exclusion criteria for waterways
WOS_18386	WOS	NA	2011	Loera Casillas, Juan; Rost, Josep; Contreras Martinez, Sarahy; Gomez Llamas, Jose Cruz	Seasonal abundance of the Orange-breasted Bunting (Passerine leclancherii) in the riparian forest of western Mexico.	NA	Ornitologia Neotropical	Language is not English or French
WOS_18392	WOS	10.2307/3801791	1984	LOFT, ER; MENKE, JW	DEER USE AND HABITAT CHARACTERISTICS OF TRANSMISSION-LINE CORRIDORS IN A DOUGLAS-FIR FOREST	NA	Journal of Wildlife Management	The comparator is inappropriate
WOS_18410	WOS	10.1002/ajp.22174	2013	Loken, Brent; Spehar, Stephanie; Rayadin, Yaya	Terrestriality in the Bornean Orangutan (Pongo pygmaeus morio) and Implications for Their Ecology and Conservation	NA	American Journal of Primatology	Sites are not in the bioclimatic region
ACTU_WOS_F_446	WOS	10.1007/s10980-017-0582-z	2018	Loman, ZG; Deluca, WV; Harrison, DJ; Loftin, CS; Rolek, BW; Wood, PB	Landscape capability models as a tool to predict fine-scale forest bird occupancy and abundance	NA	NA	The document meets previous screening exclusion criteria (Exposure)
ACTU_WOS_T_9211	WOS	10.1111/acv.12208	2015	Lomas, E; Larsen, KW; Bishop, CA	Persistence of Northern Pacific Rattlesnakes masks the impact of human disturbance on weight and body condition	NA	NA	Sites are not in the bioclimatic region
WOS_18414	WOS	10.1046/j.1466-822x.2001.00221.x	2001	Lomolino, M. V.; Perault, D. R.	Island biogeography and landscape ecology of mammals inhabiting fragmented, temperate rain forests	NA	Global Ecology and Biogeography	The document meets previous screening exclusion criteria (Exposure)
ACTU_WOS_T_2880	WOS	10.1002/wsb.777	2017	Long, AM; Colon, MR; Bosman, JL; McFarland, TM; Locatelli, AJ; Stewart, LR; Mathewson, HA; Newnam, JC; Morrison, ML	Effects of Road Construction Noise on Golden-Cheeked Warblers: An Update	NA	NA	Sampling points are not on verges (exposure)
WOS_18427	WOS	10.2193/2009-096	2010	Long, Eric S.; Diefenbach, Duane R.; Wallingford, Bret D.; Rosenberry, Christopher S.	Influence of Roads, Rivers, and Mountains on Natal Dispersal of White-Tailed Deer	NA	Journal of Wildlife Management	Sites are not in the bioclimatic region
ZR_14797	ZR	NA	2007	Long, Shuai; Zhou, Cai-quan; Wang, Wei-kui; Wei, Wei; Hu, Jin-chu	The habitat and nest-site selection of common pheasants in spring and summer in Nanchong, China.	NA	NA	Language is not English or French
WOS_18459	WOS	10.1080/03946975.2013.803820	2013	Lopes, L. E.; Gonzaga, L. P.	Taxonomy, natural history, and conservation of Paroaria baeri (Aves: Thraupidae)	NA	Tropical Zoology	Sites are not in the bioclimatic region
WOS_18460	WOS	10.1017/S0959270908000014	2008	Lopes, Leonardo E.; Maldonado-Coelho, Marcos; Hoffmann, Diego; Luiz, Edson R.; D'Angelo Neto, Santos	Geographic distribution, habitat association, and conservation status of the critically endangered minas gerais tyrannulet Phylloscartes roquettei	NA	Bird Conservation International	Sites are not in the bioclimatic region
WOS_18461	WOS	NA	2007	Lopes, Leonardo Esteves; Braz, Vivian S.	Birds of Pedro Afonso region, Tocantins, Brazil	NA	Revista Brasileira De Ornitologia	Language is not English or French
ACTU_ZR_F_109	ZR	NA	2017	Lopez-Lanus, Bernabe; Mencia, Pablo	DIVERSITY, ABUNDANCE AND STATE OF CONSERVATION OF THE BIRDS OF THE MONTE LINDO AND PILAGA STREAMS IN THE EAST OF FORMOSA PROVINCE, ARGENTINA.	NA	NA	Language is not English or French
ZR_14812	ZR	10.1371/journal.pone.0017196	2011	Lopez-Lopez, Pascual; Ferrer, Miguel; Madero, Agustin; Casado, Eva; McGrady, Michael	Solving Man-Induced Large-Scale Conservation Problems: The Spanish Imperial Eagle and Power Lines.	NA	NA	There is no comparator
ZR_14816	ZR	NA	2014	Lorant, Miklos; Vadasz, Csaba	The effect of above-ground medium voltage power lines on displaying site selection of the Great Bustard (Otis tarda) in Central Hungary.	NA	NA	The document meets previous screening exclusion criteria (Exposure)
ACTU_WOS_F_1942	WOS	10.1111/aec.12375	2016	Lorenzon, RE; Beltzer, AH; Olguin, PF; Ronchi-Virgolini, AL	Habitat heterogeneity drives bird species richness, nestedness and habitat selection by individual species in fluvial wetlands of the Parana River, Argentina	NA	NA	The comparator is inappropriate
ACTU_WOS_F_2338	WOS	10.1556/168.2016.17.1.6	2016	Lorenzon, RE; Beltzer, AH; Peltzer, PM; Ronchi-Virgolini, AL; Tittarelli, M; Olguin, P	Local conditions vs regional context: variation in composition of bird communities along the Middle Parana River, an extensive river-floodplain system of South America	NA	NA	Sampling points are not on verges (exposure)
WOS_18552	WOS	10.1674/0003-0031(2003)149[0219:TPEBDA]2.0.CO;2	2003	Loukmas, J. J.; Mayack, D. T.; Richmond, M. E.	Track plate enclosures: Box designs affecting attractiveness to riparian mammals	NA	American Midland Naturalist	The document meets exclusion criteria for waterways
WOS_18563	WOS	NA	1996	Lovallo, M. J.; Anderson, E. M.	Bobcat movements and home ranges relative to roads in Wisconsin	NA	Wildlife Society Bulletin	Sites are not in the bioclimatic region
ZR_5414	ZR	10.2307/3671264	1985	Lovell, D. C.; Choate, J. R.; Bissell, S. J.	Succession of mammals in a disturbed area of the Great Plains.	NA	NA	Sites are not in the bioclimatic region
ZR_5423	ZR	10.2307/3801140	1989	Lowney, M. S.; Hill, E. P.	Wood duck nest sites in bottomland hardwood forests of Mississippi.	NA	NA	The document meets previous screening exclusion criteria (Exposure)
WOS_18606	WOS	NA	2009	Loy, Anna; Carranza, Maria Laura; Cianfrani, Carmen; D'Alessandro, Evelina; Bonesi, Laura; Di Marzio, Piera; Minotti, Michele; Reggiani, Gabriella	Otter Lutra lutra population expansion: assessing habitat suitability and connectivity in southern Italy	NA	Folia Zoologica	The study type is inappropriate (no data, simulation, recommendation)
ACTU_WOS_T_589	WOS	10.1002/wsb.849	2018	Ludlow, SM; Davis, SK	Oil and Natural Gas Development Influence Nest-site Selection and Nest Survival of Upland-nesting Waterfowl and Shorebirds	NA	NA	Sites are not in the bioclimatic region
WOS_18699	WOS	10.1590/S0101-81752008000300006	2008	Ludwig, Gabriela; Aguiar, Lucas M.; Svoboda, Walfrido K.; Hilst, Carmen L. S.; Navarro, Italmar T.; Vitule, Jean R. S.; Passos, Fernando C.	Comparison of the diet of Alouatta caraya (Primates: Atelidae) between a riparian island and mainland on the Upper Parana River, southern Brazil	NA	Revista Brasileira De Zoologia	Sites are not in the bioclimatic region
ACTU_WOS_T_9516	WOS	10.1650/CONDOR-14-215.1	2015	Luepold, SHB; Hodgman, TP; McNulty, SA; Cohen, J; Foss, CR	Habitat selection, nest survival, and nest predators of Rusty Blackbirds in northern New England, USA	NA	NA	Sites are not in the bioclimatic region
EM_297	GREY_LITT_email_request	NA	2011	Lugon, Alain; Roué, Sébastien; Petit, Anne	Les déplacements des chiroptères autour des infrastructures ferroviaires : un exemple avec des passages pour le Minioptère de Schreibers sur la LGV Rhin-Rhône	NA	NA	The study type is inappropriate (no data, simulation, recommendation)
WOS_18749	WOS	10.1007/s10531-010-9934-6	2010	Lundy, Mathieu G.; Montgomery, W. Ian	A multi-scale analysis of the habitat associations of European otter and American mink and the implications for farm scale conservation schemes	NA	Biodiversity and Conservation	The document meets exclusion criteria for waterways
WOS_18750	WOS	10.1007/s10344-009-0330-z	2010	Lundy, Mathieu; Montgomery, Ian	Summer habitat associations of bats between riparian landscapes and within riparian areas	NA	European Journal of Wildlife Research	The document meets exclusion criteria for waterways
WOS_18753	WOS	NA	2004	Lunney, D.; Grant, T.; Matthews, A.	Distribution of the platypus in the bellinger catchment from community knowledge and field survey and its relationship to river disturbance	NA	Proceedings of the Linnean Society of New South Wales	The comparator is inappropriate
ACTU_WOS_T_9904	WOS	10.1111/gcb.12997	2015	Luo, JH; Siemers, BM; Koselj, K	How anthropogenic noise affects foraging	NA	NA	The study type is inappropriate (no data, simulation, recommendation)
ACTU_WOS_T_75	WOS	10.1007/s10592-018-1046-y	2018	Luqman, H; Muller, R; Vaupel, A; Brodbeck, S; Bolliger, J; Gugerli, F	No distinct barrier effects of highways and a wide river on the genetic structure of the Alpine newt (Ichthyosaura alpestris) in densely settled landscapes	NA	NA	The document meets previous screening exclusion criteria (Outcome)
WOS_18801	WOS	10.1007/s00267-005-0088-3	2006	Lussier, Suzanne M.; Enser, Richard W.; Dasilva, Sara N.; Charpentier, Michael	Effects of habitat disturbance from residential development on breeding bird communities in riparian corridors	NA	Environmental Management	The comparator is inappropriate
ACTU_WOS_F_2704	WOS	10.1139/cjz-2015-0167	2016	Luszcz, TMJ; Barclay, RMR	Influence of forest composition and age on habitat use by bats in southwestern British Columbia	NA	NA	Sites are not in the bioclimatic region
WOS_18822	WOS	NA	2002	Lychwala, M.; Tyrrell, M.; McLachlan, G.	Threatened and endangered species: A case study of the Maritimes & Northeast natural gas pipeline in Maine	NA	NA	Pdf cannot be obtained (and sites are not in the temperate bioclimatic region)
WOS_18843	WOS	NA	1998	Lynn, S.; Morrison, M. L.; Kuenzi, A. J.; Neale, J. C. C.; Sacks, B. N.; Hamlin, R.; Hall, L. S.	Bird use of riparian vegetation along the Truckee River, California and Nevada	NA	Great Basin Naturalist	The comparator is inappropriate
WOS_18897	WOS	10.1016/S0006-3207(00)00180-4	2001	Mac Nally, R.; Parkinson, A.; Horrocks, G.; Conole, L.; Tzaros, C.	Relationships between terrestrial vertebrate diversity, abundance and availability of coarse woody debris on south-eastern Australian floodplains	NA	Biological Conservation	Results are in an unexploitable format
WOS_18908	WOS	NA	2002	MacCracken, J. G.	Response of forest floor vertebrates to riparian hardwood conversion along the Bear River, Southwest Washington	NA	Forest Science	Results are in an unexploitable format
ZR_14909	ZR	NA	2013	MacCulloch, Ross D.; Reynolds, Robert P.	Baseline Inventory of Amphibians and Reptiles in the Vicinity of Kurupukari, Guyana.	NA	NA	Sites are not in the bioclimatic region
WOS_18911	WOS	NA	2003	Macdonald, D. W.; Harrington, L. A.	The American mink: the triumph and tragedy of adaptation out of context	NA	New Zealand Journal of Zoology	The document is a review
WOS_18912	WOS	10.1034/j.1600-0587.2002.250306.x	2002	Macdonald, D. W.; Sidorovich, V. E.; Anisomova, E. I.; Sidorovich, N. V.; Johnson, P. J.	The impact of American mink Mustela vison and European mink Mustela lutreola on water voles Arvicola terrestris in Belarus	NA	Ecography	Sites are not in the bioclimatic region
ZR_14912	ZR	NA	1987	Macdonald, I. A. W.; Nott, T. B.	Invasive alien organisms in central South West Africa/Namibia: results of a reconnaisance survey conducted in November 1984.	NA	NA	Sites are not in the bioclimatic region
WOS_18929	WOS	10.1046/j.1523-1739.1999.013002367.x	1999	Mace, R. D.; Waller, J. S.; Manley, T. L.; Ake, K.; Wittinger, W. T.	Landscape evaluation of grizzly bear habitat in western Montana	NA	Conservation Biology	Sites are not in the bioclimatic region
WOS_18930	WOS	10.2307/2404779	1996	Mace, R. D.; Waller, J. S.; Manley, T. L.; Lyon, L. J.; Zuuring, H.	Relationships among grizzly bears, roads and habitat in the Swan Mountains, Montana	NA	Journal of Applied Ecology	Sites are not in the bioclimatic region
ACTU_WOS_T_4559	WOS	10.1080/00222933.2017.1381771	2017	Machado, TLDS; Lombardi, VT; de Meireles, RC; Teixeira, JPG; Solar, RRD; Lopes, LE	Breeding biology of the threatened Campo Miner Geositta poeciloptera (Aves: Scleruridae), a Neotropical grassland specialist	NA	NA	Sites are not in the bioclimatic region
WOS_18937	WOS	10.1139/Z06-134	2006	Machtans, Craig S.	Songbird response to seismic lines in the western boreal forest: a manipulative experiment	NA	Canadian Journal of Zoology-Revue Canadienne De Zoologie	Sites are not in the bioclimatic region
WOS_18942	WOS	NA	2013	Macias, Andrzej; Gadzinski, Jedrzej	Assessment of Road Transport Environmental Impact as Illustrated by a Metropolitan Area	NA	Polish Journal of Environmental Studies	The document meets previous screening exclusion criteria (Population)
WOS_19004	WOS	10.1016/0006-3207(84)90015-6	1984	MADER, HJ	ANIMAL HABITAT ISOLATION BY ROADS AND AGRICULTURAL FIELDS	NA	Biological Conservation	The comparator is inappropriate
ZR_14943	ZR	NA	1990	Madsen, A. B.	Otters (Lutra lutra) and traffic.	NA	NA	Pdf cannot be obtained
WOS_19036	WOS	10.5424/fs/2014232-04488	2014	Magdaleno, Fernando; Martinez, Roberto	Evaluating the quality of riparian forest vegetation: the Riparian Forest Evaluation (RFV) index	NA	Forest Systems	The document meets previous screening exclusion criteria (Population)
WOS_19047	WOS	NA	2003	Magill, R. T.; Smith, L. M.; Ray, J. D.	Nest box use by cavity nesting birds in Riparian zones of the Southern Great Plains	NA	Texas Journal of Science	Pdf cannot be obtained
WOS_19057	WOS	10.1007/s00267-008-9132-4	2008	Magner, Joseph A.; Vondracek, Bruce; Brooks, Kenneth N.	Grazed riparian management and stream channel response in southeastern minnesota (USA) streams	NA	Environmental Management	Sites are not in the bioclimatic region
WOS_19068	WOS	10.3375/043.030.0201	2010	Maguire, Timothy J.; Hadley, Keith S.	A Multi-Scale Assessment of Avian Diversity Following Stream Rewatering, Owens River Gorge, California	NA	Natural Areas Journal	The document meets exclusion criteria for waterways
WOS_19096	WOS	10.1071/WR97007	1998	Mahon, P. S.; Banks, P. B.; Dickman, C. R.	Population indices for wild carnivores: a critical study in sand-dune habitat, south-western Queensland	NA	Wildlife Research	Sites are not in the bioclimatic region
ACTU_WOS_F_1098	WOS	10.1007/s10530-017-1408-2	2017	Mahoney, SM; Theimer, TC; Johnson, MJ; Foster, JT	Similar dietary but different numerical responses to nonnative tamarisk (Tamarix spp.) by two native warblers	NA	NA	Sites are not in the bioclimatic region
EM_302	GREY_LITT_email_request	NA	2006	Mairie de Paris; RFF	Protocole entre la Ville de Paris et Réseau Ferré de France concernant la Petite Ceinture	NA	NA	The type of document is not appropriate
WOS_19120	WOS	10.1016/S0167-8809(00)00259-0	2001	Maisonneuve, C.; Rioux, S.	Importance of riparian habitats for small mammal and herpetofaunal communities in agricultural landscapes of southern Quebec	NA	Agriculture Ecosystems & Environment	Sites are not in the bioclimatic region
WOS_19142	WOS	10.1897/1552-8618(1992)11[1691:OMRTEI]2.0.CO;2	1992	MAKI, AW	OF MEASURED RISKS - THE ENVIRONMENTAL IMPACTS OF THE PRUDHOE BAY, ALASKA, OIL-FIELD	NA	Environmental Toxicology and Chemistry	Sites are not in the bioclimatic region
ACTU_WOS_F_197	WOS	10.1016/j.agee.2018.01.013	2018	Malan, JAC; Flint, N; Jackson, EL; Irving, AD; Swain, DL	Offstream watering points for cattle: Protecting riparian ecosystems and improving water quality?	NA	NA	The document is a review
WOS_19168	WOS	10.1046/j.1523-1739.2000.99070.x	2000	Malcolm, J. R.; Ray, J. C.	Influence of timber extraction routes on central African small-mammal communities, forest structure, and tree diversity	NA	Conservation Biology	Sites are not in the bioclimatic region
ZR_5570	ZR	10.2174/1874839200802010030	2008	Malcom, J. W.; Radke, W. R.	Effects of riparian and wetland restoration on an avian community in Southeast Arizona, USA.	NA	NA	Sites are not in the bioclimatic region
WOS_19170	WOS	10.1139/Z05-128	2005	Male, S. K.; Nol, E.	Impacts of roads associated with the Ekati Diamond Mine (TM), Northwest Territories, Canada, on reproductive success and breeding habitat of Lapland Longspurs	NA	Canadian Journal of Zoology-Revue Canadienne De Zoologie	Sites are not in the bioclimatic region
ZR_14989	ZR	NA	1998	Malizia, L. R.; Aragon, R.; Chacoff, N. P.; Monmany, A. C.	Are roads barriers for bird movements? The case of La Florida Provincial Reserve (Tucuman, Argentina).	NA	NA	Language is not English or French
WOS_19190	WOS	10.1071/WR96119	1998	Mallick, S. A.; Hocking, G. J.; Driessen, M. M.	Road-kills of the eastern barred bandicoot (Perameles gunnii) in Tasmania: an index of abundance	NA	Wildlife Research	The comparator is inappropriate
WOS_19206	WOS	10.1111/j.0021-8901.2004.00929.x	2004	Malo, J. E.; Suarez, F.; Diez, A.	Can we mitigate animal-vehicle accidents using predictive models?	NA	Journal of Applied Ecology	The comparator is inappropriate
ACTU_WOS_T_6405	WOS	10.1007/s10344-016-1025-x	2016	Malo, JE; de la Morena, ELG; Hervas, I; Mata, C; Herranz, J	Uncapped tubular poles along high-speed railway lines act as pitfall traps for cavity nesting birds	NA	NA	The document does not dealt with our 6 specific questions
WOS_19226	WOS	10.1017/S0959270912000160	2013	Malzof, Silvina L.; Bolkovic, Maria L.; Thompson, Jeffrey J.; Quintana, Ruben D.	Habitat occupancy of the Dusky-legged Guan in the lower delta of the Parana River, Argentina	NA	Bird Conservation International	The comparator is inappropriate
ACTU_WOS_F_2462	WOS	10.1650/CONDOR-15-163.1	2016	Mandal, J; Raman, TRS	Shifting agriculture supports more tropical forest birds than oil palm or teak plantations in Mizoram, northeast India	NA	NA	Sites are not in the bioclimatic region
WOS_19265	WOS	10.1046/j.1365-2664.2000.00537.x	2000	Manel, S.; Buckton, S. T.; Ormerod, S. J.	Testing large-scale hypotheses using surveys: the effects of land use on the habitats, invertebrates and birds of Himalayan rivers	NA	Journal of Applied Ecology	Sites are not in the bioclimatic region
ACTU_WOS_F_824	WOS	10.1007/s11284-017-1481-0	2017	Mangachena, JR; Geerts, S	Invasive alien trees reduce bird species richness and abundance of mutualistic frugivores and nectarivores; a bird's eye view on a conflict of interest species in riparian habitats	NA	NA	The comparator is inappropriate
WOS_19287	WOS	10.1007/s10531-014-0834-z	2015	Mann, Gareth K. H.; O'Riain, M. Justin; Parker, Daniel M.	The road less travelled: assessing variation in mammal detection probabilities with camera traps in a semi-arid biodiversity hotspot	NA	Biodiversity and Conservation	Sites are not in the bioclimatic region
WOS_19297	WOS	NA	2001	Manning, A. E. E.; White, C. M.	Breeding biology of mountain plovers (Charadrius montanus) in the Uinta basin	NA	Western North American Naturalist	Sites are not in the bioclimatic region
WOS_19323	WOS	NA	2012	Manuwal, David A.	Bird Populations in Montana Linear Riparian Areas at 12, 28, and 40 Year Intervals	NA	Northwest Science	Sites are not in the bioclimatic region
WOS_19324	WOS	10.3955/046.088.0302	2014	Manuwal, David A.; Manuwal, Naomi J.; Burke, Joy A.; Manuwal, John D.	Progressive Territory Establishment of Four Species of Neotropical Migrants in Linear Riparian Areas in Western Montana	NA	Northwest Science	Sites are not in the bioclimatic region
ACTU_ZR_F_976	ZR	NA	2016	Maranan Causaren, Rubie	Species Diversity, Abundance and Habitat Distribution of Anurans in Mts. Palay-Palay Mataas-na-Gulod Protected Landscape, Luzon Island, Philippines.	NA	NA	Sites are not in the bioclimatic region
ACTU_WOS_T_4537	WOS	10.4102/abc.v47i1.2130	2017	Mararakanye, N; Magoro, MN; Matshaya, NN; Rabothata, MC; Ncobeni, SR	Railway side mapping of alien plant distributions in Mpumalanga, South Africa	NA	NA	Sites are not in the bioclimatic region
ZR_5624	ZR	NA	1980	Marchant, J. H.; Hyde, P. A.	Aspects of the distribution of riparian birds on waterways in Britain and Ireland.	NA	NA	The comparator is inappropriate
ZR_5631	ZR	NA	2003	Marchant, John; Coombes, Rachel	Breeding birds on waterways.	NA	NA	The comparator is inappropriate
WOS_19392	WOS	10.1890/08-2064.1	2010	Marczak, Laurie B.; Sakamaki, Takashi; Turvey, Shannon L.; Deguise, Isabelle; Wood, Sylvia L. R.; Richardson, John S.	Are forested buffers an effective conservation strategy for riparian fauna? An assessment using meta-analysis	NA	Ecological Applications	The document is a review
WOS_19425	WOS	NA	2007	Marin, Gedio; Bastidas, Lucio; Munoz, Jorge; Oliveros, Oswaldo; Navarro, Rosauro; Marcano, Bernardo	Ecological profile of the avifauna in the Venezuelan eastern plains as a function of anthropogenic impacts	NA	Interciencia	Language is not English or French
WOS_19444	WOS	NA	2007	Maritz, Bryan; Alexander, Graham J.	Herpetofaunal utilisation of riparian buffer zones in an agricultural landscape near Mtunzini, South Africa	NA	African Journal of Herpetology	The document meets exclusion criteria for waterways
ACTU_WOS_T_2881	WOS	10.1002/wsb.767	2017	Markle, CE; Gillingwater, SD; Levick, R; Chow-Fraser, P	The True Cost of Partial Fencing: Evaluating Strategies to Reduce Reptile Road Mortality	NA	NA	Sites are not in the bioclimatic region
[truncated: 1,398 more rows]
