# Supplementary material for: Can linear transportation infrastructure verges constitute a habitat and/or a corridor for vertebrates in temperate ecosystems? A systematic review
Source: Springer Nature journal article supplement (doi:10.1186/s13750-020-00196-7), 2020-06-05
Supplement: MOESM6 [file 13750_2020_196_MOESM6_ESM.xlsx]

## Sheet: README
Additional file 6: Study validity assessment. List of the studies included in the review with study validity assessment. For the studies excluded from further synthesis after critical appraisal, a short explanation of the reason for exclusion is provided.
Column descriptions
ID_doc	Unique identifier of the publication
Source	Source of the publication (Web of Science Core Collection (WOS), Zoological Record (ZR), grey literature (GREY_LITT)
DOI	Digital Object Identifier of the publication
Publication_year	Year of the publication
Publication_author	Author(s) of the publication
Publication_title	Title of the publication
PhD_chapter	In case the publication is a PhD thesis, chapter of the thesis considered
Publication_journal	Journal of the publication
Specific_question	Specific question (Q1-Q6) addressed by the study
Critical_appraisal_reviewer	Initials of the reviewer(s) who critically appraised the study
Comparator	Is the comparator appropriate to answer the specific question?
Study_design	Type of study design (Control-Exposure (CE), Control-Intervention (CI), Before-After-Control-Exposure (BACE), Before-After-Control-Intervention (BACI), Before-After-Intervention (BAI))
Randomisation	Is there a transparent and systematic procedure for the selection of sample plot location (e.g. randomisation, grids, etc.)?
Replicates	Is there replication of the measurements?
Other_bias	Other types of bias (e.g. method description strongly insufficient, confounding factors, etc.)
Risk_of_bias	Risk of bias (low, medium, or high)
Reasons_for_rejection	Reasons for rejection of the study when applicable
[NA stands for non available and N/A for non applicable]

## Sheet: File
ID_doc	Source	DOI	Publication_year	Publication_author	Publication_title	PhD_chapter	Publication_journal	Specific_question	Critical_appraisal_reviewer	Comparator	Study_design	Randomisation	Replicates	Other_bias	Risk_of_bias	Reasons_for_rejection
ZR_10219	ZR	10.2307/2403045	1984	Adams, L. W.	Small mammal use of an interstate highway median strip.	NA	NA	Q1	DYO	Appropriate	CI	Yes	Pseudoreplication	NA	Medium	N/A
ZR_10217	ZR	10.2307/2403516	1983	Adams, L. W.; Geis, A. D.	Effects of roads on small mammals.	NA	NA	Q2	MH	Appropriate	CE	Yes	Yes	NA	Low	N/A
EM_8	GREY_LITT_email_request	NA	2012	Agence Gaïadomo	Etude de la biodiversité ordinaire sur des emprises RFF de Seine-et-Marne et conception d’un outil dédié d’aide à la décision relatif à la biodiversité	NA	NA	Q5	AV, MV	Appropriate	CE	No	Yes	Missing information in methodology (selection of control, sampling protocol…) The biodiversity index and protocols are not rigorous and relevant for other taxa than plants and bats (in my opinion)	Medium	N/A
ZR_89	ZR	NA	2004	Akmali, Vajihollah; Sharifi, Mozafar; Farassat, Hossein	Habitat selection by the common pipistrelle, Pipistrellus pipistrellus s. l. (Chiroptera: Vespertilionidae), in the Dinevar region of western Iran.	NA	NA	Q2	VA	Appropriate	CE	No	Pseudoreplication	NA	Medium	N/A
ACTU_WOS_T_2115	WOS	10.1038/s41598-017-11454-z	2017	Andersen, GE; Johnson, CN; Barmuta, LA; Jones, ME	Use of anthropogenic linear features by two medium-sized carnivores in reserved and agricultural landscapes	NA	NA	Q4	VA	Appropriate	CE	Yes	yes	NA	Low	N/A
ZR_241	ZR	NA	2006	Anderson, Jason; Law, Bradley; Tidemann, Chris	Stream use by the large-footed myotis Myotis macropus in relation to environmental variables in northern New South Wales.	NA	NA	Q2	DYO	Appropriate	CE	No	Yes	NA	Medium	N/A
WOS_1186	WOS	10.1016/j.biocon.2004.10.006	2005	Aresco, M. J.	The effect of sex-specific terrestrial movements and roads on the sex ratio of freshwater turtles	NA	Biological Conservation	Q2	DYO	Appropriate	CE	No	No	Major confounding factor (different sampling effort between exposure and control)	High	High risk of bias (major confounding factor)
WOS_1257	WOS	10.1071/MU01005	2003	Arnold, G. W.	Bird species richness and abundance in wandoo woodland and in tree plantations on farmland at Baker's Hill, Western Australia	NA	Emu	Q2	MH	Appropriate	CE	No	Pseudoreplication	NA	Medium	N/A
ZR_364	ZR	NA	2009	Arvidson, L.	Do riparian corridors composed of floodplain swamp habitat along the Hillsborough River support the same rodent species as xeric habitat islands?	NA	NA	Q4	DYO	Appropriate	?	Yes	Pseudoreplication	Major confounding factor	High	High risk of bias (major confounding factor)
WOS_1323	WOS	10.1007/s10531-012-0390-3	2012	Ascensao, Fernando; Clevenger, Anthony P.; Grilo, Clara; Filipe, Joel; Santos-Reis, Margarida	Highway verges as habitat providers for small mammals in agrosilvopastoral environments	NA	Biodiversity and Conservation	Q2	DYO	Appropriate	CE	Yes	Yes	NA	Low	N/A
WOS_1323	WOS	10.1007/s10531-012-0390-3	2012	Ascensao, Fernando; Clevenger, Anthony P.; Grilo, Clara; Filipe, Joel; Santos-Reis, Margarida	Highway verges as habitat providers for small mammals in agrosilvopastoral environments	NA	Biodiversity and Conservation	Q5	DYO	Appropriate	CE	Yes	Yes	NA	Low	N/A
WOS_1350	WOS	10.1371/journal.pone.0031520	2012	Askins, Robert A.; Folsom-O'Keefe, Corrine M.; Hardy, Margaret C.	Effects of Vegetation, Corridor Width and Regional Land Use on Early Successional Birds on Powerline Corridors	NA	Plos One	Q5	AV, MV	Appropriate	CE	Yes	Yes	Methodology description slightly insufficient	Medium	N/A
WOS_2043	WOS	10.1590/S1984-46702014000200006	2014	Barros, Marilia A. S.; Pessoa, Daniel M. A.; Rui, Ana Maria	Habitat use and seasonal activity of insectivorous bats (Mammalia: Chiroptera) in the grasslands of southern Brazil	NA	Zoologia	Q2	DYO	Appropriate	CE	Yes	Pseudoreplication	NA	Medium	N/A
ZR_10658	ZR	NA	2003	Baudvin, Hugues; Jouaire, Stephane	Causes of death of adult tawny owls Strix aluco in some forests of the Burgundy.	NA	NA	Q2	VA	Appropriate	CE	Yes	Yes	methodology inadequately described	High	High risk of bias (method description strongly insufficient)
WOS_2289	WOS	10.1071/WR13061	2013	Beasley, James C.; Grazia, Tracy E.; Johns, Paul E.; Mayer, John J.	Habitats associated with vehicle collisions with wild pigs	NA	Wildlife Research	Q5	VA / DYO	Appropriate	CE	Yes	Yes	Major confounding factor	High	High risk of bias (major confounding factor)
WOS_2330	WOS	10.1016/S1146-609X(98)80011-8	1998	Bechet, A.; Isenmann, P.; Gaudin, R.	Nest predation, temporal and spatial breeding strategy in the Woodchat Shrike Lanius senator in Mediterranean France	NA	Acta Oecologica-International Journal of Ecology	Q2	DYO	Appropriate	CE	?	Yes	Methodology description slightly insufficient	Medium	N/A
ZR_10719	ZR	NA	2012	Beebee, Trevor	Decline and flounder of a Sussex common toad (Bufo bufo) population.	NA	NA	Q2	VA / MH	Appropriate	NA	NA	NA	Major confounding factor	High	High risk of bias (major confounding factor)
WOS_2459	WOS	10.1046/j.1365-2907.2000.00061.x	2000	Bellamy, P. E.; Shore, R. F.; Ardeshir, D.; Treweek, J. R.; Sparks, T. H.	Road verges as habitat for small mammals in Britain	NA	Mammal Review	Q1	VA	Appropriate	CI	Yes	Yes	NA	Medium	N/A
WOS_2502	WOS	10.1071/WR13034	2013	Ben-Ami, Dror; Ramp, Daniel	Impact of roadside habitat on swamp wallaby movement and fitness	NA	Wildlife Research	Q2	MH	Appropriate	CE	Yes	Pseudoreplication	methodology description slightly insufficient	Medium	N/A
WOS_2563	WOS	10.1007/BF00132855	1990	BENNETT, AF	HABITAT CORRIDORS AND THE CONSERVATION OF SMALL MAMMALS IN A FRAGMENTED FOREST ENVIRONMENT	NA	Landscape Ecology	Q2	DYO	Appropriate	CE	Yes	Pseudoreplication	NA	Medium	N/A
WOS_2563	WOS	10.1007/BF00132855	1990	BENNETT, AF	HABITAT CORRIDORS AND THE CONSERVATION OF SMALL MAMMALS IN A FRAGMENTED FOREST ENVIRONMENT	NA	Landscape Ecology	Q4	DYO	Appropriate	CE	Yes	Pseudoreplication	Major confounding factor	High	High risk of bias (major confounding factor)
WOS_2945	WOS	NA	2012	Biricik, Murat; Karakas, Recep	Birds of Hasankeyf (South-eastern Anatolia, Turkey) Under the Threat of a Big Dam Project	NA	Natural Areas Journal	Q2	DYO	Appropriate	CE	No	Pseudoreplication	methodology inadequately described	High	High risk of bias (method description strongly insufficient)
WOS_2982	WOS	NA	2009	Bissonette, John A.; Rosa, Silvia A.	Road Zone Effects in Small-Mammal Communities	NA	Ecology and Society	Q2	MH	Appropriate	CE	Yes	Yes	methodology description slightly insufficient	Medium	N/A
WOS_3034	WOS	NA	1994	BLAKE, D.; HUTSON, AM; RACEY, PA; RYDELL, J.; SPEAKMAN, JR	USE OF LAMPLIT ROADS BY FORAGING BATS IN SOUTHERN ENGLAND	NA	Journal of Zoology	Q1	DYO	Appropriate	CI	No	Yes	NA	Medium	N/A
WOS_3242	WOS	10.1016/S0006-3207(01)00028-3	2001	Bolger, D. T.; Scott, T. A.; Rotenberry, J. T.	Use of corridor-like landscape structures by bird and small mammal species	NA	Biological Conservation	Q2	VA	Appropriate	CE	Yes	Yes	methodology inadequately described	High	High risk of bias (method description strongly insufficient)
ZR_11128	ZR	NA	2012	Brearley, Grant; McAlpine, Clive; Bell, Sarah; Bradley, Adrian	Influence of urban edges on stress in an arboreal mammal: a case study of squirrel gliders in southeast Queensland, Australia.	NA	NA	Q2	VA / MH	Appropriate	NA	NA	NA	Methodology inadequately described	High	High risk of bias (method description strongly insufficient)
ZR_1359	ZR	NA	1988	Campbell, L. H.	The impact of river engineering on water birds on an English lowland river.	NA	NA	Q1	DYO	Appropriate	BAI	No	Pseudoreplication	methodology inadequately described	High	High risk of bias (method description strongly insufficient)
WOS_4502	WOS	10.2112/07-0835.1	2008	Campbell, Michael O'Neal	The impact of vegetation, river, and urban features on waterbird ecology in Glasgow, Scotland	NA	Journal of Coastal Research	Q1	DYO	Appropriate	CI	Yes	Yes	NA	Medium	N/A
WOS_4508	WOS	10.1016/j.biocon.2009.06.014	2009	Campbell, Susan; Guay, Patrick-Jean; Mitrovski, Paul John; Mulder, Raoul	Genetic differentiation among populations of a specialist fishing bat suggests lack of suitable habitat connectivity	NA	Biological Conservation	Q4	DYO	Appropriate	CE	No	Yes	methodology inadequately described	High	High risk of bias (method description strongly insufficient)
WOS_4836	WOS	10.1016/S0964-8305(03)000330-7	2003	Castillo, E.; Priotto, J.; Ambrosio, A. M.; Provensal, M. C.; Pini, N.; Morales, M. A.; Steinmann, A.; Polop, J. J.	Commensal and wild rodents in an urban area of Argentina	NA	International Biodeterioration & Biodegradation	Q2	AV, YB	Appropriate	CE	No	Yes	NA	Medium	N/A
ACTU_WOS_T_6545	WOS	10.1017/S0030605314001070	2016	Cerboncini, RAS; Roper, JJ; Passos, FC	Edge effects without habitat fragmentation? Small mammals and a railway in the Atlantic Forest of southern Brazil	NA	NA	Q2	VA	Appropriate	CE	Yes	Pseudoreplication	NA	Medium	N/A
WOS_5031	WOS	10.1071/WR9960023	1996	Chambers, L. K.; Singleton, G. R.; vanWensveen, M.	Spatial heterogeneity in wild populations of house mice (Mus domesticus) on the Darling Downs, south-eastern Queensland	NA	Wildlife Research	Q1	DYO	Appropriate	CI	No	Yes	NA	Medium	N/A
WOS_5031	WOS	10.1071/WR9960023	1996	Chambers, L. K.; Singleton, G. R.; vanWensveen, M.	Spatial heterogeneity in wild populations of house mice (Mus domesticus) on the Darling Downs, south-eastern Queensland	NA	Wildlife Research	Q2	MH	Appropriate	CE	No	Yes	methodology description slightly insufficient	Medium	N/A
WOS_5108	WOS	10.1642/0004-8038(2007)124[1267:NSOAFE]2.0.CO;2	2007	Chapa-Vargas, Leonardo; Robinson, Scott K.	Nesting success of acadian flycatchers (Empidonax virescens) in floodplain forest corridors	NA	Auk	Q2	DYO	Appropriate	CE	No	Pseudoreplication	NA	Medium	N/A
WOS_5135	WOS	NA	1982	CHASKO, GG; GATES, JE	AVIAN HABITAT SUITABILITY ALONG A TRANSMISSION-LINE CORRIDOR IN AN OAK-HICKORY FOREST REGION	NA	Wildlife Monographs	Q1	AV, MV	Appropriate	CI	Yes	No	NA	High	High risk of bias (no replication)
WOS_5252	WOS	NA	2009	Chen, Tien-Hsi; Lue, Kuang-Yang	Changes in the Population Structure and Diet of the Chinese Stripe-Necked Turtle (Mauremys sinensis) Inhabiting a Disturbed River in Northern Taiwan	NA	Zoological Studies	Q1	DYO	Appropriate	BAI	No	Pseudoreplication	NA	Medium	N/A
ACTU_GREY_LITT_98	GREY_LITT_Yves Bertheau	NA	2018	Claireau, Fabien	Evaluation des impacts de la fragmentation autoroutière sur les chauves-souris à différentes échelles spatio-temporelles	NA	NA	Q2	DYO	Appropriate	CE	?	Yes	Methodology description slightly insufficient	Medium	N/A
WOS_5736	WOS	10.1071/WR05085	2006	Clarke, Donna J.; Pearce, Kate A.; White, John G.	Powerline corridors: degraded ecosystems or wildlife havens?	NA	Wildlife Research	Q1	AV	Appropriate	CI	Yes	Yes	NA	Medium	N/A
WOS_5736	WOS	10.1071/WR05085	2006	Clarke, Donna J.; Pearce, Kate A.; White, John G.	Powerline corridors: degraded ecosystems or wildlife havens?	NA	Wildlife Research	Q2	AV	Appropriate	CE	Yes	Yes	NA	Low	N/A
WOS_5738	WOS	10.1016/j.landurbplan.2008.04.009	2008	Clarke, Donna J.; White, John G.	Recolonisation of powerline corridor vegetation by small mammals: Timing and the influence of vegetation management	NA	Landscape and Urban Planning	Q1	AV, Jean-François Godeau, AJ	Appropriate	CI	Yes	Pseudoreplication	NA	Medium	N/A
WOS_5738	WOS	10.1016/j.landurbplan.2008.04.009	2008	Clarke, Donna J.; White, John G.	Recolonisation of powerline corridor vegetation by small mammals: Timing and the influence of vegetation management	NA	Landscape and Urban Planning	Q2	AV, Jean-François Godeau, AJ	Appropriate	CE	Yes	Yes	NA	Low	N/A
ZR_1668	ZR	NA	2005	Clear, Sarah	Factors affecting the distribution of Pipistrellus pipistrellus and Pipistrellus pygmaeus in the Lothians region, Scotland.	NA	NA	Q2	VA	Appropriate	CE	No	Yes	NA	Medium	N/A
ZR_1898	ZR	NA	2010	Crowe, Olivia	An Assessment of the Effects of Arterial Drainage Maintenance on Kingfisher Alcedo atthis and other riparian birds II.	NA	NA	Q1	DYO	Appropriate	BACI	No	Yes	Confounding factor	High	High risk of bias (major confounding factor)
ACTU_WOS_T_4780	WOS	NA	2017	da Silva, VP; Deffaci, AC; Hartmann, MT; Hartmann, PA	BIRDS AROUND THE ROAD: EFFECTS OF A ROAD ON A SAVANNAH BIRD COMMUNITY IN SOUTHERN BRAZIL	NA	NA	Q2	VA	Appropriate	CE	Yes	Yes	NA	Low	N/A
ZR_11845	ZR	NA	2011	Daly, Garry; Lemckert, Frank	Survey of the reptiles and amphibians of the montane forests near Tenterfield on the north coast of New South Wales.	NA	NA	Q2	VA	Appropriate	CE	No	Yes	protocol varies between control and treatment + confounding factor?	High	High risk of bias (major confounding factor)
ZR_11884	ZR	NA	2009	Davenport, Jon M.; Scott, A. Floyd	Amphibians and reptiles of Fort Donelson National Battlefield, Stewart County, Tennessee.	NA	NA	Q2	VA / MH	Appropriate	CE	No	?	protocol varies between control and treatment	High	High risk of bias (protocol varies between control and treatment)
ACTU_WOS_T_9210	WOS	10.1111/acv.12200	2015	Day, J; Baker, J; Schofield, H; Mathews, F; Gaston, KJ	Part-night lighting: implications for bat conservation	NA	NA	Q1	VA / DYO	Appropriate	CI	Yes	Yes	NA	Medium	N/A
ACTU_WOS_T_9641	WOS	10.3846/16486897.2015.1079529	2015	de Torre, R; Jimenez, MD; Ramirez, A; Mola, I; Casado, MA; Balaguer, L	USE OF RESTORATION PLANTINGS TO ENHANCE BIRD SEED DISPERSAL AT THE ROADSIDE: FAILURES AND PROSPECTS	NA	NA	Q1	VA	Appropriate	CI	Yes	Yes	NA	Medium	N/A
WOS_7243	WOS	10.1002/ece3.1049	2014	DeGregorio, Brett A.; Weatherhead, Patrick J.; Sperry, Jinelle H.	Power lines, roads, and avian nest survival: effects on predator identity and predation intensity	NA	Ecology and Evolution	Q2	AV	Appropriate	CE	No	Yes	Distance to the nearest road and powerline, difficult to isolated control and treatment	High	High risk of bias (major confounding factor)
WOS_7311	WOS	10.1034/j.1600-0587.2001.d01-209.x	2001	Delgado, J. D.; Arevalo, J. R.; Fernandez-Palacios, J. M.	Road and topography effects on invasion: edge effects in rat foraging patterns in two oceanic island forests (Tenerife, Canary Islands)	NA	Ecography	Q2	DYO	Appropriate	CE	Yes	Yes	Methodology description slightly insufficient	Medium	N/A
WOS_7311	WOS	10.1034/j.1600-0587.2001.d01-209.x	2001	Delgado, J. D.; Arevalo, J. R.; Fernandez-Palacios, J. M.	Road and topography effects on invasion: edge effects in rat foraging patterns in two oceanic island forests (Tenerife, Canary Islands)	NA	Ecography	Q5	DYO	Appropriate	CE	Yes	Yes	NA	Low	N/A
WOS_7314	WOS	10.2989/OSTRICH.2008.79.2.14.588	2008	Delgado, Juan D.; Arevalo, Jose R.; Maria Fernandez-Palacios, Jose	Bird communities in two oceanic island forests fragmented by roads on Tenerife, Canary Islands	NA	Ostrich	Q2	DYO	Appropriate	CE	No	Yes	NA	Medium	N/A
WOS_7337	WOS	10.1016/j.cbpc.2009.06.002	2009	Dell'Omo, Giacomo; Costantini, David; Lucini, Valeria; Antonucci, Giovanni; Nonno, Romolo; Polichetti, Alessandro	Magnetic fields produced by power lines do not affect growth, serum melatonin, leukocytes and fledging success in wild kestrels	NA	Comparative Biochemistry and Physiology C-Toxicology & Pharmacology	Q2	AV	Appropriate	CE	No	Yes	NA	Medium	N/A
ACTU_ZR_T_416	ZR	NA	2017	Di Santo, Maria Paola; Vignoli, Leonardo; Carpaneto, Giuseppe M.; Battisti, Corrado	Occurrence patterns of alien freshwater turtles in a large urban pond 'Archipelago' (Rome, Italy): Suggesting hypotheses on root causes.	NA	NA	Q5	VA	Appropriate	CE	No	Yes	Major confounding factor	High	High risk of bias (major confounding factor)
WOS_7646	WOS	10.2307/1564529	1994	DILLER, LV; WALLACE, RL	DISTRIBUTION AND HABITAT OF PLETHODON ELONGATUS ON MANAGED, YOUNG GROWTH FORESTS IN NORTH COASTAL CALIFORNIA	NA	Journal of Herpetology	Q2	MH	Appropriate	NA	NA	NA	Protocol varies between control and treatment	High	High risk of bias (protocol varies between control and treatment)
WOS_7800	WOS	10.1674/0003-0031(1998)140[0122:RSOCNB]2.0.CO;2	1998	Doherty, P. F.; Grubb, T. C.	Reproductive success of cavity-nesting birds breeding under high-voltage powerlines	NA	American Midland Naturalist	Q2	AV	Appropriate	CE	No	Yes	NA	Medium	N/A
WOS_8293	WOS	NA	1994	EAKLE, WL	A RAPTOR ROADSIDE SURVEY IN WESTERN TURKEY AND EASTERN GREECE	NA	Journal of Raptor Research	Q5	DYO	Appropriate	CE	Yes	Yes	Major counfonding factor	High	High risk of bias (major confounding factor)
WOS_8548	WOS	NA	2002	Ellis, A. M.; Patton, L. L.; Castleberry, S. B.	Bat activity in upland and riparian habitats in the Georgia piedmont	NA	NA	Q2	DYO	Appropriate	CE	No	Pseudoreplication	NA	Medium	N/A
WOS_8824	WOS	NA	1997	Evans, D. R.; Gates, J. E.	Cowbird selection of breeding areas: The role of habitat and bird species abundance	NA	Wilson Bulletin	Q2	AV, AC	Appropriate	CE	Yes	Yes	NA	Low	N/A
WOS_8980	WOS	10.1007/s10750-012-1166-1	2012	Farago, Sandor; Hangya, Katalin	Effects of water level on waterbird abundance and diversity along the middle section of the Danube River	NA	Hydrobiologia	Q1	DYO	Appropriate	CI	Yes	Pseudoreplication	NA	Medium	N/A
ZR_2640	ZR	NA	1987	Farina, A.	Autumn-winter structure of bird communities in selected habitats of Tuscany (Italy).	NA	NA	Q2	VA	Appropriate	CE	No	No	methodology description slightly insufficient + confounding factor ?	High	High risk of bias (no replication)
WOS_9450	WOS	10.3161/150811009X465767	2009	Flaquer, Carles; Puig-Montserrat, Xavier; Goiti, Urtzi; Vidal, Francesc; Curco, Antoni; Russo, Danilo	Habitat selection in Nathusius' pipistrelle (Pipistrellus nathusii): the importance of wetlands	NA	Acta Chiropterologica	Q2	MH	Appropriate	CE	Yes	Pseudoreplication	methodology description slightly insufficient	Medium	N/A
WOS_9687	WOS	NA	1999	Fox, A.	The role of habitat enhancement in the return of the European otter (Lutra lutra) to Northumberland	NA	Journal of the Chartered Institution of Water and Environmental Management	Q1	DYO	Appropriate	BAI	No	Yes	methodology description slightly insufficient	Medium	N/A
WOS_10004	WOS	10.1016/S0167-8809(00)00194-8	2001	Fuller, R. J.; Chamberlain, D. E.; Burton, N. H. K.; Gough, S. J.	Distributions of birds in lowland agricultural landscapes of England and Wales: How distinctive are bird communities of hedgerows and woodland?		NA	Q2	MH	Appropriate	CE	No	Yes	methodology description slightly insufficient	Medium	N/A
WOS_10033	WOS	10.1016/S1631-0691(03)00057-X	2003	Fustec, J.; Cormier, J. P.; Lode, T.	Beaver lodge location on the upstream Loire River		NA	Q1	DYO	Appropriate	CI	Yes	Pseudoreplication	NA	Medium	N/A
WOS_10125	WOS	10.1644/07-MAMM-A-397.1	2009	Galliez, Maron; Leite, Melina de Souza; Queiroz, Thiago Lopes; dos Santos Fernandez, Fernando Antonio	ECOLOGY OF THE WATER OPOSSUM CHIRONECTES MINIMUS IN ATLANTIC FOREST STREAMS OF SOUTHEASTERN BRAZIL		NA	Q2	DYO	Appropriate	CE	No	Pseudoreplication	Protocol varies between control and treatment	High	High risk of bias (protocol varies between control and treatment)
ZR_3050	ZR	10.1007/BF03193566	2002	Garin, Inazio; Zuberogoitia, Inigo; Zabala, Jabi; Aihartza, Joxerra; Clevenger, Anthony P.; Rallo, Ana	Home ranges of European mink Mustela lutreola in southwestern Europe.		NA	Q2	DYO	Appropriate	CE	No	Pseudoreplication	Major confounding factor	High	High risk of bias (major confounding factor)
WOS_10355	WOS	10.1155/2014/157824	2014	Gatesire, T.; Nsabimana, D.; Nyiramana, A.; Seburanga, J. L.; Mirville, M. O.	Bird Diversity and Distribution in relation to Urban Landscape Types in Northern Rwanda		NA	Q2	DYO	Appropriate	CE	Yes	Pseudoreplication	Methodology description slightly insufficient	Medium	N/A
WOS_10411	WOS	10.1111/j.1442-9993.2010.02201.x	2011	Geerts, Sjirk; Pauw, Anton	Easy technique for assessing pollination rates in the genus Erica reveals road impact on bird pollination in the Cape fynbos, South Africa		NA	Q2	DYO	Appropriate	CE	Yes	Pseudoreplication	NA	Medium	N/A
WOS_10617	WOS	10.2307/3802333	1998	Gibbs, J. P.	Amphibian movements in response to forest edges, roads, and streambeds in southern New England		NA	Q2	DYO	Appropriate	CE	No	Pseudoreplication	Major confounding factor	High	High risk of bias (major confounding factor)
ACTU_ZR_T_570	ZR	NA	2016	Goetze, Jim R.; Nelson, Allan D.; Choate, Larry L.	Comparison of Pasturelands Containing Texas Kangaroo Rat (Dipodomys elator) Burrows to Adjacent Roadsides in Wichita County, Texas, with Comments on Road Usage by D. elator.		NA	Q2	VA / DYO	Appropriate	CE	No	Yes	protocol varies between control and treatment; methodology description slightly insufficient; presence of a confounding factor	High	High risk of bias (protocol varies between control and treatment)
ACTU_WOS_F_1034	WOS	10.3161/00016454AO2017.52.1.007	2017	Gomes, M; Rabaca, JE; Gdinho, C; Ramos, JA	Seasonal variation in bird species richness and abundance in riparian galleries in Southern Portugal		NA	Q2	VA / DYO	Appropriate	CE	No	Yes	protocol varies between control and treatment	High	High risk of bias (protocol varies between control and treatment)
ACTU_WOS_T_7534	WOS	10.1093/jmammal/gyv165	2016	Gonzalez-Gallina, A; Benitez-Badillo, G; Hidalgo-Mihart, MG; Equihua, M; Rojas-Soto, OR	Roadkills as a complementary information source for biological surveys using rodents as a model		NA	Q5	VA	Appropriate	CE	Yes	Yes	methodology description slightly insufficient	Medium	N/A
WOS_11059	WOS	10.1071/WR96063	1997	Goosem, M.; Marsh, H.	Fragmentation of a small-mammal community by a powerline corridor through tropical rainforest		NA	Q1	AV, AC / DYO	Appropriate	CI	Yes	No	NA	High	High risk of bias (no replication)
WOS_11059	WOS	10.1071/WR96063	1997	Goosem, M.; Marsh, H.	Fragmentation of a small-mammal community by a powerline corridor through tropical rainforest		NA	Q2	AV, AC	Appropriate	CE	Yes	Yes	NA	Low	N/A
WOS_11059	WOS	10.1071/WR96063	1997	Goosem, M.; Marsh, H.	Fragmentation of a small-mammal community by a powerline corridor through tropical rainforest		NA	Q3	AV, AC / DYO	Appropriate	CI	Yes	No	NA	High	High risk of bias (no replication)
ACTU_GREY_LITT_59	GREY_LITT_FrontiersIn	10.3389/fevo.2017.00065	2017	Grace, Molly K.; Smith, Daniel J.; Noss, Reed F.	Roadside Abundance of Anurans within a Community Correlates with Reproductive Investment	NA	Frontiers in Ecology and Evolution	Q2	DYO	Appropriate	CE	No	Pseudoreplication	NA	Medium	N/A
ZR_3440	ZR	NA	2007	Guichon, M. Laura; Cassini, Marcelo H.	Riparian wildlife richness along the Lujan River.	NA	NA	Q5	VA / DYO	Appropriate	CE	Yes	Pseudoreplication	Major confounding factor	High	High risk of bias (major confounding factor)
ZR_13096	ZR	NA	2009	Guiller, Gaetan	Railway lines: an alternative for preserving snakes.	NA	NA	Q5	AV	Appropriate	CE	No	Yes	Abandonned railway, sampling not specially on verges	Medium	N/A
EM_600	GREY_LITT_email_request	NA	2013	Guinard, Eric	Infrastructures de transport autoroutières et avifaune: les facteurs influençant la mortalité par collision	NA	NA	Q2	AV, MV	Appropriate	CE	No	No	NA	High	High risk of bias (no replication)
ACTU_WOS_T_5557	WOS	10.1007/s10980-016-0398-2	2016	Hamer, AJ	Accessible habitat delineated by a highway predicts landscape-scale effects of habitat loss in an amphibian community	NA	NA	Q2	VA	Appropriate	CE	No	Yes	protocol varies between control and treatment	High	High risk of bias (protocol varies between control and treatment)
ZR_13302	ZR	NA	1987	Havlin, J.	On the importance of railway lines for the life of avifauna in agrocoenoses.	NA	NA	Q5	AV	Appropriate	NA	NA	NA	Very difficult to extract results, highly confounding factors between landscape context, type of railways….	High	High risk of bias (major confounding factor)
WOS_12532	WOS	10.1016/j.foreco.2008.09.054	2009	Hein, Cris D.; Castleberry, Steven B.; Miller, Karl V.	Site-occupancy of bats in relation to forested corridors	NA	Forest Ecology and Management	Q2	MH / DYO	Appropriate	CE	Yes	Yes	Methodology description slightly insufficient	Medium	N/A
ZR_3720	ZR	10.2307/1521209	1986	Heitmeyer, M. E.	Postbreeding distribution and habitat use of wading birds in Oklahoma, USA.	NA	NA	Q2	VA	Appropriate	CE	Yes	Yes	methodology description slightly insufficient	Medium	N/A
ACTU_WOS_T_2529	WOS	10.1016/j.landurbplan.2017.04.003	2017	Hindmarch, S; Elliott, JE; Mccann, S; Levesque, P	Habitat use by barn owls across a rural to urban gradient and an assessment of stressors including, habitat loss, rodenticide exposure and road mortality	NA	NA	Q2	VA / MH	Appropriate	CE	Yes	Pseudoreplication	NA	Medium	N/A
ACTU_WOS_T_5308	WOS	10.1371/journal.pone.0167603	2016	Hinton, JW; Proctor, C; Kelly, MJ; van Manen, FT; Vaughan, MR; Chamberlain, MJ	Space Use and Habitat Selection by Resident and Transient Red Wolves (Canis rufus)	NA	NA	Q4	VA	Appropriate	CE	Yes	Yes	attrition biais, changing status	Medium	N/A
ACTU_WOS_T_9480	WOS	10.1002/ece3.1768	2015	Holbrook, JD; Vierling, KT; Vierling, LA; Hudak, AT; Adam, P	Occupancy of red-naped sapsuckers in a coniferous forest: using LiDAR to understand effects of vegetation structure and disturbance	NA	NA	Q2	VA / MH	Appropriate	CE	Yes	Yes	Methodology description slightly insufficient	Medium	N/A
ZR_13504	ZR	NA	2011	Holm, Thomas E.; Laursen, Karsten	Car traffic along hedgerows affects breeding success of Great Tits Parus major.	NA	NA	Q2	MH	Appropriate	CE	Yes	Pseudoreplication	NA	Medium	N/A
ZR_3919	ZR	NA	1999	Homan, Peter	A fauna survey of riparian and other revegetation sites in Eltham, Victoria.	NA	NA	Q2	VA	Appropriate	CE	Yes	Pseudoreplication	protocol varies between control and treatment	High	High risk of bias (major confounding factor)
WOS_13300	WOS	10.1002/rra.2660	2014	Houston, W. A.; Black, R. L.	EFFECT OF A MAJOR FLOOD ON BREEDING AND HABITAT OF THE CRIMSON FINCH (NEOCHMIA PHAETON): A RIPARIAN SPECIALIST	NA	River Research and Applications	Q1	DYO	Appropriate	BAI	?	Yes	methodology inadequately described	High	High risk of bias (method description strongly insufficient)
ACTU_WOS_T_2835	WOS	10.3161/00016454AO2017.52.1.009	2017	Husby, M	Traffic influence on roadside bird abundance and behaviour	NA	NA	Q2	VA	Appropriate	CE	No	Yes	methodology inadequately described	High	High risk of bias (method description strongly insufficient)
ZR_13684	ZR	NA	2000	Isenmann, Paul; Debout, Gabriel; Lepley, Michel	Lesser grey shrike Lanius minor breeding near Montpellier (south France).	NA	NA	Q2	VA	Appropriate	CE	No	Yes	methodology inadequately described	High	High risk of bias (method description strongly insufficient)
ACTU_WOS_T_10395	WOS	10.5253/arde.v103i1.a4	2015	Janiszewski, T; Minias, P; Wojciechowski, Z	Selective forces responsible for transition to nesting on electricity poles in the White Stork Ciconia ciconia	NA	NA	Q5	VA / DYO	Appropriate	CE	No	Pseudoreplication	NA	Medium	N/A
ACTU_WOS_T_1552	WOS	10.1016/j.baae.2017.09.013	2017	Jumeau, J; Boucharel, P; Handrich, Y; Burel, F	Road-related landscape elements as a habitat: A main asset for small mammals in an intensive farming landscape	NA	NA	Q2	VA	Appropriate	CE	No	Yes	attrition biais	Medium	N/A
ACTU_WOS_T_5390	WOS	10.13128/Acta_Herpetol-17922	2016	Kaczmarski, M; Kaczmarek, JM	Heavy traffic, low mortality - tram tracks as terrestrial habitat of newts	NA	NA	Q2	VA / MH	Appropriate	CE	No	Pseudoreplication	NA	Medium	N/A
ZR_14010	ZR	NA	2015	Kaufman, Donald W.; Kaufman, Glennis A.	Ord's kangaroo rats in north-central Kansas: Habitat associations and unexpected locations.	NA	NA	Q2	VA / MH	Appropriate	CE	No	Yes	Methodology inadequately described	High	High risk of bias (method description strongly insufficient)
ACTU_WOS_T_328	WOS	NA	2018	Keehn, JE; Feldman, CR	PREDATOR ATTACK RATES AND ANTI-PREDATOR BEHAVIOR OF SIDE-BLOTCHED LIZARDS (UTA STANSBURIANA) AT SOUTHERN CALIFORNIA WIND FARMS, USA	NA	NA	Q2	DYO	Appropriate	CE	Yes	Yes	presence of a confounding factor; protocol varies between control and treatment	High	High risk of bias (major confounding factor and protocol varies between control and treatment)
ZR_14230	ZR	10.2307/2403044	1984	Kolb, H. H.	Factors affecting the movements of dog foxes in Edinburgh.	NA	NA	Q4	AV	Appropriate	CE	No	Yes	NA	Medium	N/A
ZR_14269	ZR	NA	2001	Kosinski, Ziemowit	The breeding ecology of the Greenfinch Carduelis chloris in urban conditions (study in Krotoszyn, W Poland).	NA	NA	Q2	VA	Appropriate	CE	Yes	Yes	methodology description slightly insufficient	Medium	N/A
WOS_16377	WOS	10.1186/s13028-014-0048-0	2014	Krijger, Inge M.; Cornelissen, Jan B. W. J.; Wisselink, Henk J.; Meerburg, Bastiaan G.	Prevalence of Toxoplasma gondii in common moles (Talpa europaea)	NA	Acta Veterinaria Scandinavica	Q2	VA	Appropriate	CE	No	Pseudoreplication	methodology inadequately described	High	High risk of bias (method description strongly insufficient)
WOS_16416	WOS	10.2307/2425785	1987	KROODSMA, RL	EDGE EFFECT ON BREEDING BIRDS ALONG POWER-LINE CORRIDORS IN EAST TENNESSEE	NA	American Midland Naturalist	Q2	AV	Appropriate	CE	Yes	Yes	NA	Low	N/A
ZR_5027	ZR	10.1002/aqc.1077	2010	Langton, Steve D.; Briggs, Philip A.; Haysom, Karen A.	Daubenton's bat distribution along rivers - developing and testing a predictive model.	NA	NA	Q5	DYO	Appropriate	CE	Yes	Yes	Confounding factor	Medium	N/A
ZR_5031	ZR	NA	2005	Lanszki, Jozsef	Otter monitoring between 2000 and 2004 in the Drava region (Hungary).	NA	NA	Q2	DYO	Appropriate	CE	No	Pseudoreplication	methodology inadequately described	High	High risk of bias (method description strongly insufficient)
WOS_17144	WOS	NA	2011	Law, Bradley S.; Chidel, Mark; Tap, Patrick	Bat activity in ephemeral stream-beds in the Pilliga forests: clarifying the importance of flyways and buffer widths in open forest and woodland	NA	NA	Q2	VA	Appropriate	CE	No	Yes	NA	Medium	N/A
WOS_17545	WOS	10.1111/j.1749-4877.2012.00290.x	2013	Leon, Vanina A.; Fraschina, Jimena; Guidobono, Juan S.; Busch, Maria	Habitat use and demography of Mus musculus in a rural landscape of Argentina	NA	Integrative Zoology	Q2	AV	Appropriate	CE	No	Yes	Sampling design different for house and poultry farm!	Medium	N/A
ZR_14714	ZR	NA	2015	Lin, Si-Min; Lee, Yu; Chen, Tien-Hsi; Lin, Jhan-Wei	Habitat Preference and Management of a Chinese Pond Turtle Population Protected by the Demilitarized Kinmen Islands.	NA	NA	Q2	VA	Appropriate	CE	No	Yes	confounding factor	High	High risk of bias (major confounding factor)
ZR_5308	ZR	NA	2015	Lintott, Paul R.; Bunnefeld, Nils; Park, Kirsty J.	Opportunities for improving the foraging potential of urban waterways for bats.	NA	NA	Q5	VA	Appropriate	CE	Yes	Yes	NA	Low	N/A
WOS_18343	WOS	10.1016/j.biocon.2005.10.035	2006	Lloyd, A.; Law, B.; Goldingay, R.	Bat activity on riparian zones and upper slopes in Australian timber production forests and the effectiveness of riparian buffers	NA	Biological Conservation	Q2	DYO	Appropriate	CE	No	Yes	NA	Medium	N/A
WOS_18364	WOS	10.1046/j.1365-2699.1998.2540773.x	1998	Lock, P. A.; Naiman, R. J.	Effects of stream size on bird community structure in coastal temperate forests of the Pacific Northwest, USA	NA	Journal of Biogeography	Q2	MH	Appropriate	CE	Yes	Yes	NA	Low	N/A
WOS_18378	WOS	NA	1999	Loegering, J. P.; Anthony, R. G.	Distribution, abundance, and habitat association of riparian-obligate and -associated birds in the Oregon Coast Range	NA	Northwest Science	Q2	MH	Appropriate	CE	No	Yes	protocol varies between control and treatment (creek survey and 5th and 6th order streams)	High	High risk of bias (protocol varies between control and treatment)
WOS_18380	WOS	10.1676/04-100.1	2006	Loegering, John P.; Anthony, Robert G.	Nest-site selection and productivity of American Dippers in the Oregon Coast Range	NA	Wilson Journal of Ornithology	Q5	VA / DYO	Appropriate	CE	Yes	Yes	Methodology inadequately described	High	High risk of bias (method description strongly insufficient)
ACTU_WOS_T_5188	WOS	10.1002/ece3.2608	2017	Long, AM; Colon, MR; Bosman, JL; Robinson, DH; Pruett, HL; McFarland, TM; Mathewson, HA; Szewczak, JM; Newnam, JC; Morrison, ML	A before-after control-impact assessment to understand the potential impacts of highway construction noise and activity on an endangered songbird	NA	NA	Q2	VA	Appropriate	BACE	No	?	methodology inadequately described	High	High risk of bias (method description strongly insufficient)
ACTU_WOS_F_1319	WOS	10.1016/j.ecolind.2016.11.012	2017	Lopez-Baucells, A; Casanova, L; Puig-Montserrat, X; Espinal, A; Paramo, F; Flaquer, C	Evaluating the use of Myotis daubentonii as an ecological indicator in Mediterranean riparian habitats	NA	NA	Q5	VA / DYO	Appropriate	CE	Yes	Yes	NA	Low	N/A
EM_304_3	GREY_LITT_email_request	NA	2014	MALLARD, Fanny	Développement d'une méthode d'évaluation quantitative des effets des projets d'infrastructures de transport terrestre sur les milieux naturels	Chapitre 4-5	NA	Q2	DYO	Appropriate	CE	No	Pseudoreplication	NA	Medium	N/A
WOS_19221	WOS	NA	2008	Maltchik, L.; Peixoto, C. D.; Stenert, C.; Moreira, L. F. B.; Mochado, I. F.	Dynamics of the terrestrial amphibian assemblage in a flooded riparian forest fragment in a Neotropical region in the south of Brazil	NA	Brazilian Journal of Biology	Q2	MH	Appropriate	CE	Yes	Pseudoreplication	NA	Medium	N/A
WOS_19431	WOS	10.1016/0006-3207(95)00032-Y	1995	MARINI, MA; ROBINSON, SK; HESKE, EJ	EDGE EFFECTS ON NEST PREDATION IN THE SHAWNEE-NATIONAL-FOREST, SOUTHERN ILLINOIS	NA	Biological Conservation	Q2	DYO	Appropriate	CE	No	Pseudoreplication	NA	Medium	N/A
WOS_19562	WOS	10.1111/j.1469-7998.2006.00207.x	2007	Martin, J. K.; Handasyde, K. A.	Comparison of bobuck (Trichosurus cunninghami) demography in two habitat types in the Strathbogie Ranges, Australia	NA	Journal of Zoology	Q2	MH	Appropriate	CE	Yes	Pseudoreplication	Major confounding factor ; methodology description slightly insuficient	High	High risk of bias (major confounding factor)
WOS_19996	WOS	10.2193/2009-535	2010	McCollister, Matthew F.; van Manen, Frank T.	Effectiveness of Wildlife Underpasses and Fencing to Reduce Wildlife-Vehicle Collisions	NA	Journal of Wildlife Management	Q2	VA / MH	Appropriate ?	CE	No	Pseudoreplication	Protocol varies between control and treatment	High	High risk of bias (protocol varies between control and treatment)
WOS_20186	WOS	10.1656/058.012.0307	2013	McNair, Douglas B.	Cliff Swallow Breeding Range Expansion along the Great Pee Dee River Corridor in the Carolinas	NA	Southeastern Naturalist	Q2	VA	Appropriate	CE	No	Yes	NA	Medium	N/A
ZR_15309	ZR	NA	2007	Messenger, Anthony; Roome, Martin	The breeding population of the hobby in Derbyshire.	NA	NA	Q2	VA	Appropriate	CE	no	Yes	methodology inadequately described	High	High risk of bias (method description strongly insufficient)
WOS_20526	WOS	10.1139/cjz-77-1-108	1999	Meunier, F. D.; Corbin, J.; Verheyden, C.; Jouventin, P.	Effects of landscape type and extensive management on use of motorway roadsides by small mammals	NA	Canadian Journal of Zoology-Revue Canadienne De Zoologie	Q1	VA	Appropriate	CI	No	Yes	NA	Medium	N/A
WOS_20526	WOS	10.1139/cjz-77-1-108	1999	Meunier, F. D.; Corbin, J.; Verheyden, C.; Jouventin, P.	Effects of landscape type and extensive management on use of motorway roadsides by small mammals	NA	Canadian Journal of Zoology-Revue Canadienne De Zoologie	Q2	VA	Appropriate	CE	No	Yes	NA	Medium	N/A
WOS_20526	WOS	10.1139/cjz-77-1-108	1999	Meunier, F. D.; Corbin, J.; Verheyden, C.; Jouventin, P.	Effects of landscape type and extensive management on use of motorway roadsides by small mammals	NA	Canadian Journal of Zoology-Revue Canadienne De Zoologie	Q5	VA	Appropriate	CE	No	Yes	NA	Medium	N/A
WOS_20527	WOS	10.1016/S1146-609X(99)80010-1	1999	Meunier, F. D.; Verheyden, C.; Jouventin, P.	Bird communities of highway verges: Influence of adjacent habitat and roadside management	NA	Acta Oecologica-International Journal of Ecology	Q1	DYO	Appropriate	CI	No	Yes	Major confounding factor	High	High risk of bias (major confounding factor)
WOS_20527	WOS	10.1016/S1146-609X(99)80010-1	1999	Meunier, F. D.; Verheyden, C.; Jouventin, P.	Bird communities of highway verges: Influence of adjacent habitat and roadside management	NA	Acta Oecologica-International Journal of Ecology	Q2	VA	Appropriate	CE	No	Yes	NA	Medium	N/A
WOS_20527	WOS	10.1016/S1146-609X(99)80010-1	1999	Meunier, F. D.; Verheyden, C.; Jouventin, P.	Bird communities of highway verges: Influence of adjacent habitat and roadside management	NA	Acta Oecologica-International Journal of Ecology	Q5	VA	Appropriate	CE	No	Yes	NA	Medium	N/A
WOS_20980	WOS	10.1111/j.1526-100X.2005.00049.x	2005	Moffatt, K. C.; Crone, E. E.; Holl, K. D.; Schlorff, R. W.; Garrison, B. A.	Importance of hydrologic and landscape heterogeneity for restoring bank swallow (Riparia riparia) colonies along the Sacramento River, California	NA	Restoration Ecology	Q1	DYO	Appropriate	CI	No	Pseudoreplication	NA	Medium	N/A
ACTU_WOS_T_3669	WOS	10.1088/1748-9326/aa5c74	2017	Moreira, F; Encarnacao, V; Rosa, G; Gilbert, N; Infante, S; Costa, J; D'Amico, M; Martins, RC; Catry, I	Wired: impacts of increasing power line use by a growing bird population	NA	NA	Q2	VA	Appropriate	CE	?	Yes	methodology inadequately described	High	High risk of bias (method description strongly insufficient)
WOS_21289	WOS	10.1525/auk.2010.09033	2010	Morgan, Gina M.; Boughton, Raoul K.; Rensel, Michelle A.; Schoech, Stephan J.	ROAD EFFECTS ON FOOD AVAILABILITY AND ENERGETIC INTAKE IN FLORIDA SCRUB-JAYS (APHELOCOMA COERULESCENS)	NA	Auk	Q2	MH	Appropriate	CE	No	Pseudoreplication	NA	Medium	N/A
WOS_21290	WOS	10.1071/WR11029	2012	Morgan, Gina M.; Wilcoxen, Travis E.; Rensel, Michelle A.; Schoech, Stephan J.	Are roads and traffic sources of physiological stress for the Florida scrub-jay?	NA	Wildlife Research	Q2	MH	Appropriate	CE	?	?	methodology inadequately described	High	High risk of bias (method description strongly insufficient)
WOS_21455	WOS	10.1016/j.ijmm.2007.12.009	2008	Movila, Alexandru; Gatewood, Anne; Toderas, Ion; Duca, Maria; Papero, Michele; Uspenskaia, Inga; Conovalov, Jurii; Fish, Durland	Prevalence of Borrelia burgdorferi sensu lato in Ixodes ricinus and I-lividus ticks collected from wild birds in the Republic of Moldova	NA	International Journal of Medical Microbiology	Q2	VA	Appropriate	CE	No	No	methodology inadequately described	High	High risk of bias (no replication)
WOS_21633	WOS	NA	1994	MURPHY, EC; DOWDING, JE	RANGE AND DIET OF STOATS (MUSTELA-ERMINEA) IN A NEW-ZEALAND BEECH FOREST	NA	New Zealand Journal of Ecology	Q2	MH	Appropriate	CE	Yes	Pseudoreplication	NA	Medium	N/A
WOS_21705	WOS	NA	1991	MUTZE, GJ; GREEN, B.; NEWGRAIN, K.	WATER FLUX AND ENERGY USE IN WILD HOUSE MICE (MUS-DOMESTICUS) AND THE IMPACT OF SEASONAL ARIDITY ON BREEDING AND POPULATION-LEVELS	NA	Oecologia	Q2	MH	Appropriate	CE	?	?	methodology inadequatly described	High	High risk of bias (method description strongly insufficient)
ACTU_WOS_T_2043	WOS	10.1016/j.trd.2017.08.011	2017	Myczko, L; Sparks, TH; Skorka, P; Rosin, ZM; Kwiecinski, Z; Gorecki, MT; Tryjanowski, P	Effects of local roads and car traffic on the occurrence pattern and foraging behaviour of bats	NA	NA	Q2	VA	Appropriate	CE	No	Yes	NA	Medium	N/A
ACTU_WOS_T_540	WOS	10.1016/j.ufug.2018.01.023	2018	Niu, HY; Xing, JJ; Zhang, HM; Wang, D; Wang, XR	Roads limit of seed dispersal and seedling recruitment of Quercus chenii in an urban hillside forest	NA	NA	Q2	VA / DYO	Appropriate	CE	No	Pseudoreplication	NA	Medium	N/A
WOS_22619	WOS	NA	2006	O'Donnell, Colin F. J.; Christie, Jennifer E.	Habitat use and nocturnal activity of lesser short-tailed bats (Mystacina tuberculata) in comparison with long-tailed bats (Chalinolobus tuberculatus) in temperate rainforest	NA	New Zealand Journal of Zoology	Q2	MH	Appropriate	CE	Yes	Pseudoreplication	NA	Medium	N/A
ACTU_WOS_T_10426	WOS	10.3356/0892-1016-49.2.201	2015	Ojeda, VS; Trejo, AR; Seijas, S; Chazarreta, L	HIGHWAY NETWORK EXPANSION IN ANDEAN PATAGONIA: A WARNING NOTICE FROM RUFOUS-LEGGED OWLS	NA	NA	Q5	VA / DYO	Appropriate	CE	Yes	Yes	Methodology inadequately described	High	High risk of bias (method description strongly insufficient)
ACTU_WOS_F_3662	WOS	10.1674/0003-0031-174.1.87	2015	Owen, SF; Berl, JL; Edwards, JW; Ford, WM; Wood, PB	Raccoon Spatial Requirements and Multi-Scale Habitat Selection within an Intensively Managed Central Appalachian Forest	NA	NA	Q2	VA	Appropriate	CE	Yes	Yes	methodology description slightly insufficient	Medium	N/A
ZR_16026	ZR	NA	2011	Papp, Sandor	Breeding of Eurasian sparrowhawks (Accipiter nisus) in two Hungaian [Hungarian] towns.	NA	NA	Q2	VA	Appropriate	CE	Yes	Yes	confounding factor; methodology description slightly insufficient	High	High risk of bias (major confounding factor)
WOS_23921	WOS	10.1016/j.landurbplan.2007.01.017	2007	Pescador, Moises; Peris, Salvador	Influence of roads on bird nest predation: An experimental study in the Iberian Peninsula	NA	Landscape and Urban Planning	Q2	DYO	Appropriate	CE	Yes	Yes	NA	Low	N/A
WOS_23941	WOS	10.1656/045.016.n412	2009	Peterman, William E.; Ryan, Travis J.	Basking Behavior of Emydid Turtles (Chysemys picta, Graptemys geographica, and Trachemys scripta) in an Urban Landscape	NA	Northeastern Naturalist	Q1	DYO	Appropriate	CI	No	Pseudoreplication	Major confounding factors	High	High risk of bias (major confounding factor)
ZR_7014	ZR	10.2307/2963523	1996	Petit, Lisa J.; Petit, Daniel R.	Factors governing habitat selection by prothonotary warblers: field tests of the Fretwell-Lucas models.	NA	NA	Q2	VA	Appropriate	CE	No	Pseudoreplication	NA	Medium	N/A
ZR_16241	ZR	NA	2006	Pocock, Zoe; Lawrence, Ruth E.	How far into a forest does the effect of a road extend? Defining road edge effect in eucalypt forests of south-eastern Australia.	NA	NA	Q2	MH	Appropriate	CE	Yes	Pseudoreplication	methodology description slightly insufficient	Medium	N/A
ZR_16242	ZR	NA	2011	Pocora, Irina; Pocora, Viorel	THE USE BY BATS (CHIROPTERA: VESPERTILIONIDAE) OF VARIOUS HABITAT TYPES	NA	NA	Q2	VA	Appropriate	CE	No	Yes	protocol varies between control and treatment	High	High risk of bias (major confounding factor)
WOS_24637	WOS	10.1016/0006-3207(95)00080-1	1996	Prenda, J.; GranadoLorencio, C.	The relative influence of riparian habitat structure and fish availability on otter Lutra lutra L-sprainting activity in a small Mediterranean catchment	NA	Biological Conservation	Q2	DYO	Appropriate	CE	No	Yes	Major counfonding factor	High	High risk of bias (major confounding factor)
ZR_7239	ZR	NA	1989	Prigioni, C.; Galeotti, P.	Factors affecting the winter distribution of wildfowl in the valley of the Ticino River (northern Italy).	NA	NA	Q2	VA / MH	Appropriate	CE	No	?	Methodology inadequately described	High	High risk of bias (method description strongly insufficient)
WOS_24754	WOS	10.1007/s10592-013-0553-0	2014	Prunier, Jerome G.; Kaufmann, Bernard; Lena, Jean-Paul; Fenet, Serge; Pompanon, Francois; Joly, Pierre	A 40-year-old divided highway does not prevent gene flow in the alpine newt Ichthyosaura alpestris	NA	Conservation Genetics	Q4	AV, SV et AJ	Appropriate	CE	No	Yes	NA	Medium	N/A
ZR_7265	ZR	NA	2000	Puky, M.	A comprehensive three-year herpetological survey in the Gemenc Region of the Duna-Drava National Park, Hungary.	NA	NA	Q2	VA	Appropriate	CE	No	Pseudoreplication	methodology inadequately described	High	High risk of bias (method description strongly insufficient)
ACTU_WOS_F_3623	WOS	10.1080/21564574.2015.1121930	2015	Rabearivony, J; Brady, LD; Jenkins, RK; Griffiths, RA; Raselimanana, AP; Bisoa, M; Raminosoa, RN	Influence of riparian habitats on the distribution of rainforest chameleons in Parc National de Ranomafana, Madagascar	NA	NA	Q2	VA	Appropriate	CE	Yes	Yes	NA	Low	N/A
ACTU_WOS_F_2865	WOS	10.6620/ZS.2016.55-22	2016	Rachwald, A; Bradford, T; Borowski, Z; Racey, PA	Habitat Preferences of Soprano Pipistrelle Pipistrellus pygmaeus (Leach, 1825) and Common Pipistrelle Pipistrellus pipistrellus (Schreber, 1774) in Two Different Woodlands in North East Scotland	NA	NA	Q2	VA	Appropriate	CE	Yes	Pseudoreplication	methodology description slightly insufficient	Medium	N/A
ACTU_GREY_LITT_15	GREY_LITT_IENE2016	NA	2017	Rautsaw, R. M.	The paths less traveled: movement of Gopher Tortoises (Gopherus polyphemus) along roads and railways	NA	NA	Q2	DYO	Appropriate	CE	No	Pseudoreplication	Protocol varies between control and treatment	High	High risk of bias (protocol varies between control and treatment)
WOS_25378	WOS	10.1016/j.actao.2014.12.003	2015	Redon; Viol, Isabelle Le; Jiguet, Frederic; Machon, Nathalie; Scher, Olivier; Kerbiriou, Christian	Road network in an agrarian landscape: Potential habitat, corridor or barrier for small mammals?	NA	Acta Oecologica-International Journal of Ecology	Q2	VA	Appropriate	CE	No	Yes	protocol varies between control and treatment	High	High risk of bias (major confounding factor)
WOS_25378	WOS	10.1016/j.actao.2014.12.003	2015	Redon; Viol, Isabelle Le; Jiguet, Frederic; Machon, Nathalie; Scher, Olivier; Kerbiriou, Christian	Road network in an agrarian landscape: Potential habitat, corridor or barrier for small mammals?	NA	Acta Oecologica-International Journal of Ecology	Q4	VA	Appropriate ?	CE	No	Yes	protocol varies between control and treatment	High	High risk of bias (protocol varies between control and treatment)
WOS_25456	WOS	10.1007/BF01640537	1991	REIJNEN, R.; FOPPEN, R.	EFFECT OF ROAD TRAFFIC ON THE BREEDING SITETENACITY OF MALE WILLOW WARBLERS (PHYLLOSCOPUS-TROCHILUS)	NA	Journal Fur Ornithologie	Q2	MH	Appropriate	CE	No	No	NA	High	High risk of bias (no replication)
WOS_25663	WOS	10.1046/j.1523-1739.1994.08041109.x	1994	RICH, AC; DOBKIN, DS; NILES, LJ	DEFINING FOREST FRAGMENTATION BY CORRIDOR WIDTH - THE INFLUENCE OF NARROW FOREST-DIVIDING CORRIDORS ON FOREST-NESTING BIRDS IN SOUTHERN NEW-JERSEY	NA	Conservation Biology	Q2	AV, SV, MV	Appropriate	CE	Yes	Yes	NA	Low	N/A
ZR_16736	ZR	NA	2010	Robley, Alan; Gormley, Andrew; Forsyth, David M.; Wilton, Alan N.; Stephens, Danielle	Movements and habitat selection by wild dogs in eastern Victoria.	NA	NA	Q4	VA	Appropriate	CE	Yes	Yes	NA	Low	N/A
ZR_16744	ZR	NA	2012	Roche, Naimh; Langton, Steve; Aughney, Tina	Car-based Bat Monitoring in Ireland 2003-2011.	NA	NA	Q1	DYO	Appropriate	CI	Yes	Yes	NA	Medium	N/A
WOS_26373	WOS	10.1007/s10531-013-0465-9	2013	Rotholz, Eliav; Mandelik, Yael	Roadside habitats: effects on diversity and composition of plant, arthropod, and small mammal communities	NA	Biodiversity and Conservation	Q2	AV, SV, MV	Appropriate	CE	Yes	Yes	NA	Low	N/A
WOS_26426	WOS	10.1371/journal.pone.0083221	2013	Royan, Alexander; Hannah, David M.; Reynolds, S. James; Noble, David G.; Sadler, Jonathan P.	Avian Community Responses to Variability in River Hydrology	NA	Plos One	Q1	DYO	Appropriate	CI	No	Yes	NA	Medium	N/A
WOS_26557	WOS	10.1016/S0006-3207(02)00089-7	2002	Russ, J. M.; Montgomery, W. I.	Habitat associations of bats in Northern Ireland: implications for conservation	NA	Biological Conservation	Q2	DYO	Appropriate	CE	Yes	Yes	NA	Low	N/A
WOS_26679	WOS	10.1007/s11284-010-0781-4	2011	Sabino-Marques, Helena; Mira, Antonio	Living on the verge: are roads a more suitable refuge for small mammals than streams in Mediterranean pastureland?	NA	Ecological Research	Q2	VA	Appropriate	CE	Yes	Yes	NA	Low	N/A
WOS_26833	WOS	NA	2007	Salek, Miroslav; Svobodova, Jana; Zasadil, Petr	Diversity loss to bird communities after regulation of riverine meanders: Is it compensated by growing oaks on fishpond dams?	NA	Acta Ornithologica	Q2	DYO	Appropriate	CE	No	Yes	Major confounding factor	High	High risk of bias (major confounding factor)
WOS_27048	WOS	10.1644/10-MAMM-A-009.1	2011	Santos, Maria J.; Matos, Hugo M.; Palomares, Francisco; Santos-Reis, Margarida	Factors affecting mammalian carnivore use of riparian ecosystems in Mediterranean climates	NA	Journal of Mammalogy	Q2	DYO	Appropriate	CE	Yes	Yes	NA	Low	N/A
WOS_27057	WOS	NA	2007	Santos, Sara M.; Mathias, Maria da Luz; Mira, Antonio; Simoes, M. Paula	Vegetation structure and composition of road verge and meadow sites colonized by cabrera vole (Microtus Cabrerae Thomas)	NA	Polish Journal of Ecology	Q2	DYO	Appropriate	CE	No	Yes	methodology description slightly insufficient	Medium	N/A
WOS_27162	WOS	10.1111/j.1365-2664.2007.01328.x	2007	Sattler, Thomas; Bontadina, Fabio; Hirzel, Alexandre H.; Arlettaz, Raphaael	Ecological niche modelling of two cryptic bat species calls for a reassessment of their conservation status	NA	Journal of Applied Ecology	Q5	VA	Appropriate	CE	?	Yes	protocol varies between control and treatment	High	High risk of bias (protocol varies between control and treatment)
WOS_27206	WOS	NA	2009	Sayah, Chafika Mouhoub; Robin, Jean-Patrice; Pevet, Paul; Monecke, Stefanie; Doumandji, Salaheddine; Saboureau, Michel	ROAD MORTALITY OF THE ALGERIAN HEDGEHOG (ATELERIX ALGIRUS) IN THE SOUMMAM VALLEY (ALGERIA)	NA	Revue D Ecologie-La Terre Et La Vie	Q5	VA / DYO	Appropriate	CE	No	Yes	High major confounding factor	High	High risk of bias (major confounding factor)
WOS_27224	WOS	10.1111/jofo.12013	2013	Scarpignato, Amy L.; George, T. Luke	Space use by Common Ravens in Marbled Murrelet nesting habitat in Northern California	NA	Journal of Field Ornithology	Q2	DYO	Appropriate	CE	Yes	Pseudoreplication	methodology description slightly insufficient	Medium	N/A
WOS_27296	WOS	NA	2004	Scher, O.; Chavaren, P.; Despreaux, M.; Thiery, A.	Highway stormwater detention ponds as biodiversity islands?	NA	Archives Des Sciences	Q1	AV, RS	N/A	N/A	N/A	N/A	N/A	N/A	Data redundant with another document
WOS_27297	WOS	10.1007/s10750-005-4464-z	2005	Scher, O.; Thiery, A.	Odonata, amphibia and environmental characteristics in motorway stormwater retention ponds (Southern France)	NA	Hydrobiologia	Q1	AV, RS	Appropriate	CI	No	Yes	Attrition_bias	Medium	N/A
WOS_27297	WOS	10.1007/s10750-005-4464-z	2005	Scher, O.; Thiery, A.	Odonata, amphibia and environmental characteristics in motorway stormwater retention ponds (Southern France)	NA	Hydrobiologia	Q5	AV, RS	Appropriate	CE	No	Yes	Attrition_bias	Medium	N/A
ACTU_ZR_T_484	ZR	NA	2017	Secco, Helio; Gomes, Luis Augusto; Lemos, Hudson; Mayer, Felipe; Machado, Thiago; Guerreiro, Marcello; Gregorin, Renato	ROAD AND LANDSCAPE FEATURES THAT AFFECT BAT ROADKILLS IN SOUTHEASTERN BRAZIL.	NA	NA	Q5	VA / DYO	Appropriate	CE	Yes	Yes	Major confounding factor	High	High risk of bias (major confounding factor)
WOS_27733	WOS	10.1111/j.1523-1739.2006.00571.x	2007	Semlitsch, Raymond D.; Ryan, Travis J.; Ramed, Kevin; Chatfield, Matt; Drehman, Bethany; Pekarek, Nicole; Spath, Mike; Watland, Angie	Salamander abundance along road edges and within abandoned logging roads in Appalachian forests	NA	Conservation Biology	Q2	DYO	Appropriate	CE	Yes	Pseudoreplication	Major confounding factor	High	High risk of bias (major confounding factor)
WOS_27796	WOS	10.1071/ZO98034	1998	Serena, M.; Thomas, J. L.; Williams, G. A.; Officer, R. C. E.	Use of stream and river habitats by the platypus, Ornithorhynchus anatinus, in an urban fringe environment	NA	Australian Journal of Zoology	Q2	DYO	Appropriate	CE	Yes	Pseudoreplication	Major confounding factor	High	High risk of bias (major confounding factor)
WOS_28751	WOS	10.1656/1528-7092(2008)7[289:MPDAAT]2.0.CO;2	2008	Smith, Matthew B.; Aborn, David A.; Gaudin, Timothy J.; Tucker, John C.	Mammalian predator distribution around a transmission line	NA	Southeastern Naturalist	Q2	AV, RS	Appropriate	CE	Yes	Pseudoreplication	No individualisation of the animals so tracks can indicate one or more animals (= proxy of abundance)	Medium	N/A
ZR_8498	ZR	NA	2006	Smith, Tina L.	A small scale study into the foraging habitat selection of Myotis and Pipistrellus spp. along the Forth & Clyde Canal, Scotland.	NA	NA	Q5	VA	Appropriate	CE	Yes	Pseudoreplication	NA	Medium	N/A
WOS_28796	WOS	10.1071/WR09050	2010	Smith-Ramirez, Cecilia; Celis-Diez, Juan L.; von Jenstchyk, Erik; Jimenez, Jaime E.; Armesto, Juan J.	Habitat use of remnant forest habitats by the threatened arboreal marsupial Dromiciops gliroides (Microbiotheria) in a rural landscape of southern Chile	NA	Wildlife Research	Q2	DYO	Appropriate	CE	No	Yes	Major confounding factor	High	High risk of bias (major confounding factor)
WOS_28927	WOS	10.1111/j.1365-2028.2004.00526.x	2004	Somers, M. J.; Nel, J. A. J.	Habitat selection by the Cape clawless otter (Aonyx capensis) in rivers in the Western Cape Province, South Africa	NA	African Journal of Ecology	Q2	VA / DYO	Appropriate	CE	Yes	Yes	Methodologie description inadequately described	High	High risk of bias (method description strongly insufficient)
ZR_17554	ZR	10.1007/s11252-006-0009-0	2007	Sparling, Donald W.; Eisemann, John; Kuenzel, Wayne	Nesting and foraging behavior of red-winged blackbirds in stormwater wetlands.	NA	NA	Q2	VA / MH	Appropriate ?	CE	Yes	Yes	Major confounding factor	High	High risk of bias (major confounding factor)
WOS_29201	WOS	10.1016/j.landurbplan.2010.07.006	2010	Stagoll, Karen; Manning, Adrian D.; Knight, Emma; Fischer, Joern; Lindenmayer, David B.	Using bird-habitat relationships to inform urban planning	NA	Landscape and Urban Planning	Q2	DYO	Appropriate	CE	Yes	Pseudoreplication	methodology inadequately described	High	High risk of bias (method description strongly insufficient)
ACTU_ZR_T_473	ZR	NA	2017	Stewart, Robyn A.; Clark, Tyler J.; Shelton, John; Stringfellow, Matt; Scott, Catherine; White, Stewart A.; McCafferty, Dominic J.	Urban grasslands support threatened water voles.	NA	NA	Q2	VA	Appropriate	CE	Yes	Yes	NA	Low	N/A
WOS_29560	WOS	NA	1998	Storch, D.	Densities and territory sizes of birds in two different lowland communities in eastern Bohemia	NA	Folia Zoologica	Q2	DYO	Appropriate	CE	Yes	Pseudoreplication	Major confounding factor	High	High risk of bias (major confounding factor)
ZR_8736	ZR	NA	2009	Stoycheva, Slaveya; Georgiev, Dilian; Pandourski, Ivan; Tilova, Elena	Bat diversity in two large towns of the Upper Thrace, Bulgaria (Chiroptera).	NA	NA	Q2	VA	Appropriate	CE	No	Yes	methodology inadequately described; confounding factor ?	High	High risk of bias (method description strongly insufficient)
ZR_17716	ZR	NA	2010	Strenna, Luc; Boileau, Nicolas	Activity, hunting methods and prey of the common kestrel Falco tinnunculus during wintertime in Burgundy.	NA	NA	Q2	VA	Appropriate	CE	Yes	Pseudoreplication	methodology inadequately described	High	High risk of bias (method description strongly insufficient)
WOS_29772	WOS	10.1046/j.1365-3008.2000.00119.x	2000	Sugimura, K.; Sato, S.; Yamada, F.; Abe, S.; Hirakawa, H.; Handa, Y.	Distribution and abundance of the Amami rabbit Pentalagus furnessi in the Amami and Tokuno Islands, Japan	NA	Oryx	Q2	VA	Appropriate	CE	Yes	Yes	protocol varies between control and treatment	High	High risk of bias (protocol varies between control and treatment)
WOS_29978	WOS	NA	2007	Svobodova, Jana; Salek, Miroslav; Albrecht, Tomas	Roads do not increase predation on experimental nests in a highly fragmented forest landscape	NA	Folia Zoologica	Q4	VA	Appropriate	CE	Yes	Yes	NA	Low	N/A
ACTU_ZR_T_979	ZR	NA	2016	Taillie, Paul J.; Marcus, Jeffrey F.; Carpenter, John P.; Anderson, Scott K.	The Distribution, Persistence, and Habitat Associations of Bachman's Sparrow (Peucaea aestivalis) in North Carolina.	NA	NA	Q2	VA	Appropriate	CE	No	Yes	NA	Medium	N/A
ZR_8904	ZR	NA	1992	Takeuchi, M.; Koganezawa, M.	Home range and habitat utilisation of the red fox Vulpes vulpes in the Ashio Mountains, central Japan.	NA	NA	Q2	VA	Appropriate	CE	Yes	Pseudoreplication	attrition biais; confounding factor ?	Medium	N/A
WOS_30484	WOS	NA	2002	Tewksbury, J. J.; Black, A. E.; Nur, N.; Saab, V. A.; Logan, B. D.; Dobkin, D. S.	Effects of anthropogenic fragmentation and livestock grazing on western riparian bird communities	NA	NA	Q5	VA	Appropriate	CE	No	Yes	methodology inadequately described	High	High risk of bias (method description strongly insufficient)
WOS_30686	WOS	10.1111/j.1600-0587.2010.06939.x	2011	Threlfall, Caragh; Law, Bradley; Penman, Trent; Banks, Peter B.	Ecological processes in urban landscapes: mechanisms influencing the distribution and activity of insectivorous bats	NA	Ecography	Q2	DYO	Appropriate	CE	Yes	Yes	methodology inadequately described	High	High risk of bias (method description strongly insufficient)
ZR_9105	ZR	NA	1992	Todd, P. A.	Mountain beaver habitat use and management implications in Yosemite National Park.	NA	NA	Q2	VA	Appropriate	CE	Yes	Yes	confounding factor	High	High risk of bias (major confounding factor)
ACTU_WOS_F_523	WOS	10.3161/15081109ACC2017.19.2.004	2017	Todd, VLG; Waters, DA	Small scale habitat preferences of Myotis daubentonii, Pipistrellus pipistrellus, and potential aerial prey in an upland river valley	NA	NA	Q5	VA	Appropriate	CE	No	Yes	methodology description slightly insufficient	Medium	N/A
ACTU_WOS_F_3975	WOS	NA	2015	Todorov, E; Daskalova, G; Shurulinkov, P	Current Breeding Distribution and Conservation of White-tailed Eagle, Haliaeetus albicilla (L.) in Bulgaria	NA	NA	Q2	VA	Appropriate	CE	?	Yes	methodology inadequately described	High	High risk of bias (method description strongly insufficient)
ACTU_WOS_F_3975	WOS	NA	2015	Todorov, E; Daskalova, G; Shurulinkov, P	Current Breeding Distribution and Conservation of White-tailed Eagle, Haliaeetus albicilla (L.) in Bulgaria	NA	NA	Q5	VA	Appropriate	CE	?	Yes	methodology inadequately described	High	High risk of bias (method description strongly insufficient)
WOS_31046	WOS	NA	1990	TREWHELLA, WJ; HARRIS, S.	THE EFFECT OF RAILWAY LINES ON URBAN FOX (VULPES-VULPES) NUMBERS AND DISPERSAL MOVEMENTS	NA	Journal of Zoology	Q4	AV, MV	Appropriate	CE	Yes	Yes	Methodology inadequately described	Medium	N/A
ZR_9194	ZR	NA	2002	Trousdale, Austin W.; Beckett, David C.	Bats (Mammalia: Chiroptera) recorded from mist-net and bridge surveys in southern Mississippi.	NA	NA	Q2	VA	Appropriate	CE	No	Yes	protocol varies between control and treatment ; methodology description slightly insufficient	High	High risk of bias (major confounding factor)
WOS_31136	WOS	10.1111/conl.12022	2014	Tryjanowski, Piotr; Sparks, Tim H.; Jerzak, Leszek; Rosin, Zuzanna M.; Skorka, Piotr	A Paradox for Conservation: Electricity Pylons May Benefit Avian Diversity in Intensive Farmland	NA	Conservation Letters	Q2	AV	Appropriate	CE	Yes	Yes	NA	Low	N/A
WOS_31687	WOS	10.1007/s10661-013-3131-5	2013	Vance, Joshua A.; Angus, Norse B.; Anderson, James T.	Effects of bridge construction on songbirds and small mammals at Blennerhassett Island, Ohio River, USA	NA	Environmental Monitoring and Assessment	Q1	VA / DYO	Appropriate	BACI	No	Pseudoreplication	Confounding factor	High	High risk of bias (major confounding factor)
WOS_31687	WOS	10.1007/s10661-013-3131-5	2013	Vance, Joshua A.; Angus, Norse B.; Anderson, James T.	Effects of bridge construction on songbirds and small mammals at Blennerhassett Island, Ohio River, USA	NA	Environmental Monitoring and Assessment	Q2	VA / DYO	Appropriate	CE	No	Yes	Confounding factor	High	High risk of bias (major confounding factor)
WOS_31720	WOS	10.1016/j.ecoleng.2013.12.025	2014	Vandevelde, Jean-Christophe; Bouhours, Alice; Julien, Jean-Francois; Couvet, Denis; Kerbiriou, Christian	Activity of European common bats along railway verges	NA	Ecological Engineering	Q2	AV	Appropriate	CE	No	Yes	NA	Medium	N/A
WOS_31794	WOS	10.1111/j.1365-2427.2007.01837.x	2007	Vaughan, I. P.; Noble, D. G.; Ormerod, S. J.	Combining surveys of river habitats and river birds to appraise riverine hydromorphology	NA	Freshwater Biology	Q1	DYO	Appropriate	CI	Yes	Yes	methodology description slightly insufficient	Medium	N/A
WOS_32002	WOS	10.1111/j.1365-294X.2005.02568.x	2005	Vignieri, S. N.	Streams over mountains: influence of riparian connectivity on gene flow in the Pacific jumping mouse (Zapus trinotatus)	NA	Molecular Ecology	Q4	VA / DYO	Appropriate	CE	No	Yes	NA	Medium	N/A
WOS_32017	WOS	10.1051/limn/2012020	2012	Vilches, Antonio; Miranda, Rafael; Arizaga, Juan; Galicia, David	Habitat selection by breeding Common Kingfishers (Alcedo atthis L.) in rivers from Northern Iberia	NA	Annales De Limnologie-International Journal of Limnology	Q1	DYO	Appropriate	CI	No	Yes	methodology description slightly insufficient	Medium	N/A
WOS_32067	WOS	10.1023/A:1016684428664	2001	Virgos, E.	Relative value of riparian woodlands in landscapes with different forest cover for medium-sized Iberian carnivores	NA	Biodiversity and Conservation	Q2	VA / MH	Appropriate	CE	Yes	Yes	Protocol varies between control and treatment	High	High risk of bias (protocol varies between control and treatment)
WOS_32067	WOS	10.1023/A:1016684428664	2001	Virgos, E.	Relative value of riparian woodlands in landscapes with different forest cover for medium-sized Iberian carnivores	NA	Biodiversity and Conservation	Q5	VA	Appropriate	CE	Yes	Yes	NA	Low	N/A
ACTU_WOS_F_3690	WOS	10.1007/s00265-015-1936-7	2015	Vorel, A; Valkova, L; Hamsikova, L; Malon, J; Korbelova, J	Beaver foraging behaviour: Seasonal foraging specialization by a choosy generalist herbivore	NA	NA	Q2	VA / DYO	Appropriate	CE	No	No	Confounding factors (landscape context)	High	High risk of bias (no replication)
WOS_32344	WOS	10.2307/2404980	1996	Walsh, A. L.; Harris, S.	Foraging habitat preferences of vespertilionid bats in Britain	NA	Journal of Applied Ecology	Q5	DYO	Appropriate	CE	Yes	Yes	Major confounding factor ; methodology description slightly insufficient	High	High risk of bias (major confounding factor)
WOS_32678	WOS	10.1016/0168-1591(91)90249-W	1991	WARING, GH; GRIFFIS, JL; VAUGHN, ME	WHITE-TAILED DEER ROADSIDE BEHAVIOR, WILDLIFE WARNING REFLECTORS, AND HIGHWAY MORTALITY	NA	Applied Animal Behaviour Science	Q1	VA	Appropriate	BACI	No	Pseudoreplication	Confounding factor	High	High risk of bias (major confounding factor)
WOS_32739	WOS	10.1111/j.1469-7998.1999.tb00755.x	1999	Waters, D.; Jones, G.; Furlong, M.	Foraging ecology of Leisler's bat (Nyctalus leisleri) at two sites in southern Britain	NA	Journal of Zoology	Q2	DYO	Appropriate	CE	Yes	Pseudoreplication	NA	Medium	N/A
WOS_32782	WOS	10.1642/0004-8038(2005)122[0497:CWDCMA]2.0.CO;2	2005	Weakland, C. A.; Wood, P. B.	Cerulean Warbler (Dendroica cerulea) microhabitat and landscape-level habitat characteristics in southern west Virginia	NA	Auk	Q2	VA	Appropriate	CE	No	Yes	methodology description slightly insufficient	Medium	N/A
WOS_32805	WOS	10.1016/j.biocon.2011.06.001	2011	Webb, William C.; Marzluff, John M.; Hepinstall-Cymerman, Jeff	Linking resource use with demography in a synanthropic population of common ravens	NA	Biological Conservation	Q2	DYO	Appropriate	CE	Yes	Yes	NA	Low	N/A
WOS_32881	WOS	NA	2000	Weidinger, K.	The breeding performance of blackcap Sylvia atricapilla in two types of forest habitat	NA	Ardea	Q2	DYO	Appropriate	CE	No	Pseudoreplication	Major confounding factor	High	High risk of bias (major confounding factor)
WOS_32883	WOS	10.1046/j.1526-100X.2003.00026.x	2003	Weiermans, J.; van Aarde, R. J.	Roads as ecological edges for rehabilitating coastal dune assemblages in northern KwaZulu-Natal, South Africa	NA	Restoration Ecology	Q2	VA	Appropriate	CE	Yes	Yes	NA	Low	N/A
WOS_33301	WOS	10.1111/j.1442-9993.2011.02292.x	2012	Williams, Joel R.; Driscoll, Don A.; Bull, C. Michael	Roadside connectivity does not increase reptile abundance or richness in a fragmented mallee landscape	NA	Austral Ecology	Q2	DYO	Appropriate	CE	Yes	Yes	NA	Low	N/A
GS_62	GREY_LITT_GoogleScholar	NA	1972	Williamson, P., & Evans, P. R	Lead: levels in roadside invertebrates and small mammals	NA	NA	Q2	AV	Appropriate	CE	No	Yes	NA	Medium	N/A
WOS_33330	WOS	10.1894/0038-4909(2007)52[60:CORSUB]2.0.CO;2	2007	Williford, Damon L.; Woodin, Marc C.; Skoruppa, Mary K.; Hickman, Graham C.	Characteristics of roost sites used by burrowing owls (Athene cunicularia) wintering in southern Texas	NA	Southwestern Naturalist	Q2	DYO	Appropriate	CE	Yes	No	NA	High	High risk of bias (no replication)
ACTU_WOS_T_9005	WOS	10.1111/ecog.01297	2016	Wilson, A; Fenton, B; Malloch, G; Boag, B; Hubbard, S; Begg, G	Urbanisation versus agriculture: a comparison of local genetic diversity and gene flow between wood mouse Apodemus sylvaticus populations in human-modified landscapes	NA	NA	Q4	VA	Appropriate	CE	Yes	Yes	methodology description slightly insufficient	Medium	N/A
WOS_33751	WOS	10.1016/j.agee.2011.02.031	2011	Wuczynski, Andrzej; Kujawa, Krzysztof; Dajdok, Zygmunt; Grzesiak, Wojciech	Species richness and composition of bird communities in various field margins of Poland	NA	Agriculture Ecosystems & Environment	Q2	DYO	Appropriate	CE	No	Pseudoreplication	NA	Medium	N/A
ZR_18821	ZR	NA	2012	Yamac, Elif; Kirazli, Cihangir	Road Effect on the Breeding Success and Nest Characteristics of the Eurasian Magpie (Pica pica).	NA	NA	Q2	DYO	Appropriate	CE	No	Pseudoreplication	NA	Medium	N/A
ACTU_WOS_F_3117	WOS	NA	2016	Yuan, BD; Lu, CH	Effects of urbanization on bird diversity: A case study in Yizhou, Guangxi Province, China	NA	NA	Q2	VA	Appropriate	CE	No	Yes	methodology inadequately described	High	High risk of bias (method description strongly insufficient)
WOS_34486	WOS	10.1515/MAMM.2006.051	2006	Zabala, Jabi; Zuberogoitia, Inigo; Martinez-Climent, Jose Antonio	Factors affecting occupancy by the European mink in south-western Europe	NA	Mammalia	Q1	DYO	Appropriate	CI	Yes	Yes	NA	Medium	N/A
ZR_18997	ZR	NA	2006	Zuffi, Maro A. L.; Rovina, Laura	Habitat characteristics of nesting areas and of predated nests in a Mediterranean population of the European pond turtle, Emys orbicularis galloitalica.	NA	NA	Q2	VA / DYO	Appropriate	CE	Yes	Pseudoreplication	Major confounding factor	High	High risk of bias (major confounding factor)
