# Supplementary material for: Can linear transportation infrastructure verges constitute a habitat and/or a corridor for vertebrates in temperate ecosystems? A systematic review
Source: Springer Nature journal article supplement (doi:10.1186/s13750-020-00196-7), 2020-06-05
Supplement: MOESM7 [file 13750_2020_196_MOESM7_ESM.xlsx]

## Sheet: README
Additional file 7: Systematic review table. List of the studies included in the review with coded metadata.
Column descriptions
ID_doc	Unique identifier of the publication
Source	Source of the publication (Web of Science Core Collection (WOS), Zoological Record (ZR), grey literature (GREY_LITT)
Reference	Full reference of the publication (author(s), year of publication, title, journal)
DOI	Digital Object Identifier of the publication
Publication type	Type of publication (journal article, book chapter, thesis, etc.)
Language	Language of the publication (English or French)
Question	Specific question (Q1-Q6) addressed by the study
Study design	Type of study design (Control-Exposure (CE), Control-Intervention (CI), Before-After-Control-Exposure (BACE), Before-After-Control-Intervention (BACI), Before-After-Intervention (BAI))
Risk of bias	Risk of bias (low or medium)
Country	Country where the study was conducted
Regions	Regions where the study was conducted
GPS coordinates	GPS coordinates of where the study was conducted
Biological group	Biological group studied (Amphibians, Reptiles, Birds, Small mammals, Bats, Other mammals)
LTI	Linear transportation infrastructure studies (Roads, Railways, Powerlines, Pipelines, Waterways)
LTI verge	Description of verge and its habitat (grassland, shrubland, hedge, forest, etc.)
Comparison	For specific questions Q2 and Q4: type of habitat of the control site; for specific question Q1 and Q3: management practices (mowing, pesticide spreading, pruning, planting, fence laying, etc.); for specific question Q5 and Q6: landscape metric and spatial scale
Outcomes	Outcomes studied (Abundance, species richness, Shannon index, etc.)
Included in narrative synthesis	Is the study included in the narrative synthesis?
Included in metaanalyses	Is the study included in meta-analyses?

## Sheet: File
ID_doc	Source	Reference	DOI	Publication type	Language	Question	Study design	Risk of bias	Country	Regions	GPS coordinates	Biological group	LTI	LTI verge	Comparison	Outcomes	Included in narrative synthesis	Included in metaanalyses
ZR_10219	ZR	Adams, L. W. (1984). Small mammal use of an interstate highway median strip. Journal of Applied Ecology, 21(1), 175–178.	10.2307/2403045	Article	English	Q1	CI	Medium	United States of America	North Carolina, Piedmont Plateau Physiographic Region, vicinity of Henderson	NA	Small mammals	Roads	Highway median strip	- Mowed median strip right-of-way - Unmowed median strip right-of-way	Density (capture / 100 trap nights)	Yes	No
ZR_10217	ZR	Adams, L. W., & Geis, A. D. (1983). Effects of roads on small mammals. Journal of Applied Ecology, 20, 403–415.	10.2307/2403516	Article	English	Q2	CE	Low	United States of America	Southern Piedmont of Virginia, North Carolina, South Carolina, valley region of Oregon, northern California	NA	Small mammals	Roads	Roadside	240 – 320 m from road	Relative density (captures per 100 trap-nights)	Yes	Yes
EM_8	GREY_LITT_email_request	Agence Gaïadomo. (2012). Etude de la biodiversité ordinaire sur des emprises RFF de Seine-et-Marne et conception d’un outil dédié d’aide à la décision relatif à la biodiversité (No. 290212-A).	NA	Report	French	Q5	CE	Medium	France	Ile de France/Seine et marne/TER Paris-Province + TGV Lyon-Lille (near Presles en Brie)	NA	Birds, Reptiles/Amphibians, Other mammals, Bats	Railways	Railway embankments	Types of landscape: urban, industrial, agricultural, woodland	Fauna biodiversity index (based on species richness of orthopteran, butterflies, birds, reptiles/amphibians, terrestrial mammals); Bat species diversity and hunting activity	No	No
ZR_89	ZR	Akmali, V., Sharifi, M., & Farassat, H. (2004). Habitat selection by the common pipistrelle, Pipistrellus pipistrellus s. l. (Chiroptera: Vespertilionidae), in the Dinevar region of western Iran. Zoology in the Middle East, 33(1), 43–50.	10.1080/09397140.2004.10638062	Article	English	Q2	CE	Medium	Iran	Kermanshah province, western Iran	NA	Bats	Waterways	Water meadow	Agricultural land	Bat activity (nb passes per observation period)	Yes	No
ACTU_WOS_T_2115	WOS	Andersen, G. E., Johnson, C. N., Barmuta, L. A., & Jones, M. E. (2017). Use of anthropogenic linear features by two medium-sized carnivores in reserved and agricultural landscapes. Scientific Reports, 7(11624), 1–11.	10.1038/s41598-017-11454-z	Article	english	Q4	CE	Low	Australia	Northwest Tasmania	NA	Other mammals	Roads	Roadsides	4WD tracks that receive limited or no traffic	Radiotelemetry GPS coordinates	Yes	No
ZR_241	ZR	Anderson, J., Law, B., & Tidemann, C. (2006). Stream use by the large-footed myotis Myotis macropus in relation to environmental variables in northern New South Wales. Australian Mammalogy, 28, 15–26.	10.1071/AM06003	Article	English	Q2	CE	Medium	Australia	Northern New South Wales	NA	Bats	Waterways	Side of large waterways (4th, 5th or 6th order)	Side of small waterways (2nd, 3rd or 4th order)	Species occurrence	Yes	No
WOS_1257	WOS	Arnold, G. W. (2003). Bird species richness and abundance in wandoo woodland and in tree plantations on farmland at Baker’s Hill, Western Australia. Emu, 103, 259–269.	10.1071/mu01005	Article	English	Q2	CE	Medium	Australia	Bakers Hill; Western Australia	NA	Birds	Roads	Road verges of wandoo woodland with an understorey of Dryandra sessilis	Wandoo woodland with an understorey of Dryandra sessilis	Species richness, relative abundance (number/hectare)	No	Yes
WOS_1323	WOS	Ascensao, F., Clevenger, A. P., Grilo, C., Filipe, J., & Santos-Reis, M. (2012). Highway verges as habitat providers for small mammals in agrosilvopastoral environments. Biodiversity and Conservation, 21, 3681–3697.	10.1007/s10531-012-0390-3	Article	English	Q2	CE	Low	Portugal	Alentejo region southern Portugal	Within 38°38'N, 8°34'W and 37°55'N, 8°12'W	Small mammals	Roads	Highway verges surrounded by montado or open areas	Pure montado or open areas (non-highway sites)	Abundance	Yes	Yes
WOS_1323	WOS	Ascensao, F., Clevenger, A. P., Grilo, C., Filipe, J., & Santos-Reis, M. (2012). Highway verges as habitat providers for small mammals in agrosilvopastoral environments. Biodiversity and Conservation, 21, 3681–3697.	10.1007/s10531-012-0390-3	Article	English	Q5	CE	Low	Portugal	Alentejo region southern Portugal	Within 38°38'N, 8°34'W and 37°55'N, 8°12'W	Small mammals	Roads	Highway margin	Types of landscape: montado (agrosilvopastoral system), open habitats (crops, fallows)	Abundance	Yes	No
WOS_1350	WOS	Askins, R. A., Folsom-O’Keefe, C. M., & Hardy, M. C. (2012). Effects of Vegetation, Corridor Width and Regional Land Use on Early Successional Birds on Powerline Corridors. PLOS ONE, 7(2), e31520.	10.1371/journal.pone.0031520	Article	English	Q5	CE	Low	United States of America	southeastern Connecticut	NA	Birds	Powerlines	Powerline right of way	% developed areas, % agricultural areas, in 1 or 5km buffer	Species abundance, species richness (shrubland species)	Yes	No
WOS_2043	WOS	Barros, M. A. S., Pessoa, D. M. A., & Rui, A. M. (2014). Habitat use and seasonal activity of insectivorous bats (Mammalia: Chiroptera) in the grasslands of southern Brazil. Zoologia, 31(2), 153–161.	10.1590/s1984-46702014000200006	Article	English	Q2	CE	Medium	Brazil	southernmost region of the state of Rio Grande do Sul, Santa Vitoria do Palmar	NA	Bats	Waterways	Margin of an artificial managed channel	Grassland	Passage frequency (number of bat passes per 3 min)	Yes	Yes
WOS_2330	WOS	Bechet, A., Isenmann, P., & Gaudin, R. (1998). Nest predation, temporal and spatial breeding strategy in the Woodchat Shrike Lanius senator in Mediterranean France. Acta Oecologica, 19(1), 81–87.	10.1016/s1146-609x(98)80011-8	Article	English	Q2	CE	Medium	France	20, 40, and 50 km north of Montpellier	43.36N, 3.53E	Birds	Roads	Roadside trees and bushes	Trees and bushes far from road	Survival rate of nests	Yes	No
WOS_2459	WOS	Bellamy, P. E., Shore, R. F., Ardeshir, D., Treweek, J. R., & Sparks, T. H. (2000). Road verges as habitat for small mammals in Britain. Mammal Review, 30(2), 131–139.	10.1046/j.1365-2907.2000.00061.x	Article	English	Q1	CI	Medium	United Kingdom	North Cambridgeshire	NA	Small mammals	Roads	Road verges	Varying heights of tall grass (from 0 to 1.1 m) and of hedge (from 0 to 3.5 m)	Abundance	Yes	No
WOS_2502	WOS	Ben-Ami, D., & Ramp, D. (2013). Impact of roadside habitat on swamp wallaby movement and fitness. Wildlife Research, 40, 512–522.	10.1071/wr13034	Article	English	Q2	CE	Medium	Australia	New South Wales	NA	Other mammals	Roads	Distance from road (continuous variable)	Distance from road (continuous variable)	Index of abundance (number of pellets in abundance class)	Yes	Yes
WOS_2563	WOS	Bennett, A. F. (1990). Habitat corridors and the conservation of small mammals in a fragmented forest environment. Landscape Ecology, 4(2), 109–122.	10.1007/bf00132855	Article	English	Q2	CE	Medium	Australia	South-western Victoria, Naringal	38°24'S, 142°45'E	Small mammals	Roads	Forest strip adjacent to a main road	Forest strip along an unmade road	Abundance (number of individuals)	No	No
WOS_2982	WOS	Bissonette, J. A., & Rosa, S. A. (2009). Road Zone Effects in Small-Mammal Communities. Ecology and Society, 14(1), 27.	10.5751/ES-02753-140127	Article	English	Q2	CE	Medium	United States of America	Southern Utah	38°16'N, 112°37'W	Small mammals	Roads	Shrubland, road verge	Shrubland, 600 m from road	Shannon index, Abundance	Yes	Yes
WOS_3034	WOS	Blake, D., Hutson, A. M., Racey, P. A., Rydell, J., & Speakman, J. R. (1994). Use of lamplit roads by foraging bats in southern England. Journal of Zoology, 234, 453–462.	10.1111/j.1469-7998.1994.tb04859.x	Article	English	Q1	CI	Medium	United Kingdom	Southern England, northern part of East Sussex known as the Weald	51°01'N, 00°16'E	Bats	Roads	Roadsides	- Lit road sections - Unlit road sections	Passage frequency	Yes	No
WOS_4502	WOS	Campbell, M. O. (2008). The impact of vegetation, river, and urban features on waterbird ecology in Glasgow, Scotland. Journal of Coastal Research, 24(4C), 239–245.	10.2112/07-0835.1	Article	English	Q1	CI	Medium	United Kingdom	Scotland, Glasgow	NA	Birds	Waterways	Riverbanks	Varying number of humans present	Abundance	Yes	No
WOS_4836	WOS	Castillo, E., Priotto, J., Ambrosio, A. M., Provensal, M. C., Pini, N., Morales, M. A., Steinmann, A. & Polop, J. J. (2003). Commensal and wild rodents in an urban area of Argentina. International Biodeterioration & Biodegradation, 52(3), 135–141.	10.1016/S0964-8305(03)00033-7	Article	English	Q2	CE	Medium	Argentina	city of Rio Cuarto	between 33°01' and 33°10' S, and 64°15' and 64°22' W.	Small mammals	Railways	Grassland, railway banks	Grassland, vacant lots	Abundance estimate (relative density indices)	Yes	Yes
ACTU_WOS_T_6545	WOS	Cerboncini, R. A. S., Roper, J. J., & Passos, F. C. (2016). Edge effects without habitat fragmentation? Small mammals and a railway in the Atlantic Forest of southern Brazil. Oryx, 50(3), 460–467.	10.1017/s0030605314001070	Article	English	Q2	CE	Medium	Brazil	Southern Brazil state of Parana, Marumbi State Park	NA	Small mammals	Railways	Forest-railway right of way edge	Forest, 150 m from railway right of way	Total capture, Abundance, Species richness, Species composition (Jaccard dissimilarity index)	Yes	No
WOS_5031	WOS	Chambers, L. K., Singleton, G. R., & van Wensveen, M. (1996). Spatial heterogeneity in wild populations of house mice (Mus domesticus) on the Darling Downs, south-eastern Queensland. Wildlife Research, 23, 23–38.	10.1071/wr9960023	Article	English	Q1	CI	Medium	Australia	South-Eastern Queensland, Central Open Darling Downs	27°32'S, 151°12'E	Small mammals	Roads	Road verges	- Disturbed grass verges regularly slashed - Undisturbed grass verges	Abundance	No	No
WOS_5031	WOS	Chambers, L. K., Singleton, G. R., & van Wensveen, M. (1996). Spatial heterogeneity in wild populations of house mice (Mus domesticus) on the Darling Downs, south-eastern Queensland. Wildlife Research, 23, 23–38.	10.1071/wr9960023	Article	English	Q2	CE	Medium	Australia	South-Eastern Queensland, Central Open Darling Downs	27°32'S, 151°12'E	Small mammals	Roads	Grass road verges regularly slashed (disturbed) or undisturbed	Fallow	Abundance (number of caught per 100 trap-nights)	No	No
WOS_5108	WOS	Chapa-Vargas, L., & Robinson, S. K. (2007). Nesting success of acadian flycatchers (Empidonax virescens) in floodplain forest corridors. The Auk, 124(4), 1267–1280.	10.1093/auk/124.4.1267	Article	English	Q2	CE	Medium	United States of America	Southern Illinois	NA	Birds	Roads	Forest/road and railroad edge	Forest/agricultural edge	Number of nests	No	No
WOS_5252	WOS	Chen, T.-H., & Lue, K.-Y. (2009). Changes in the Population Structure and Diet of the Chinese Stripe-Necked Turtle (Mauremys sinensis) Inhabiting a Disturbed River in Northern Taiwan. Zoological Studies, 48(1), 95–105.	NA	Article	English	Q1	BAI	Medium	Taiwan	Northern Taiwan	121°40'E, 25°05'N	Reptiles	Waterways	Riverbanks	- After intervention - Before intervention	Abundance	Yes	No
ACTU_GREY_LITT_98	GREY_LITT_Announcement_defence_of_thesis	Claireau, F. (2018). Chapitre 2. Effets des autoroutes sur l’activité chiroptérologique et la génétique des populations (Article n°3). In Thèse de Doctorat Museum National d’Histoire Naturelle. Evaluation des impacts de la fragmentation autoroutière sur les chauves-souris à différentes échelles spatio-temporelles. Retrieved from http://www.theses.fr/s149111	NA	PhD thesis chapter	French	Q2	CE	Medium	France	Western France (Niort, La Rochelle, Rennes)	46°24'N, 0°35'W ; 45°50'N, 0°37'W ; 48°2'N, 14° 57'W	Bats	Roads	Distance from road (continuous variable)	Distance from road (continuous variable)	Passage frequency	Yes	No
WOS_5736	WOS	Clarke, D. J., Pearce, K. A., & White, J. G. (2006). Powerline corridors: degraded ecosystems or wildlife havens? Wildlife Research, 33(8), 615–626.	10.1071/WR05085	Article	English	Q1	CI	Medium	Australia	Victoria	NA	Small mammals	Powerlines	Powerline corridor	3 time-since-management categories. Vegetation management was spraying, slashing, blading, clearing	Abundance	Yes	No
WOS_5736	WOS	Clarke, D. J., Pearce, K. A., & White, J. G. (2006). Powerline corridors: degraded ecosystems or wildlife havens? Wildlife Research, 33(8), 615–626.	10.1071/WR05085	Article	English	Q2	CE	Low	Australia	Victoria	NA	Small mammals	Powerlines	Powerline corridor	Adjacent forested area	Species richness, Abundance all species and species level for 4 species (Rattus fuscipes, Rattus lutreolus, Antechinus agilis, Mus domesticus)	Yes	No
WOS_5738	WOS	Clarke, D. J., & White, J. G. (2008). Recolonisation of powerline corridor vegetation by small mammals: Timing and the influence of vegetation management. Landscape and Urban Planning, 87(2), 108–116.	10.1016/j.landurbplan.2008.04.009	Article	English	Q1	CI	Medium	Australia	Southern Victoria	NA	Small mammals	Powerlines	Powerline corridor	- Slashed corridor sections - Corridor section that has not been slashed since several years	Abundance	Yes	No
WOS_5738	WOS	Clarke, D. J., & White, J. G. (2008). Recolonisation of powerline corridor vegetation by small mammals: Timing and the influence of vegetation management. Landscape and Urban Planning, 87(2), 108–116.	10.1016/j.landurbplan.2008.04.009	Article	English	Q2	CE	Low	Australia	Southern Victoria	NA	Small mammals	Powerlines	Powerline corridor	Adjacent forest	Abundance (trap success)	No	No
ZR_1668	ZR	Clear, S. (2005). Factors affecting the distribution of Pipistrellus pipistrellus and Pipistrellus pygmaeus in the Lothians region, Scotland. BaTML Publications, 2, 23–33.	NA	Article	English	Q2	CE	Medium	United Kingdom	Scotland, Lothians regions	NA	Bats	Waterways	Canal sites	Paired non-canal sites	Passage frequency (number of passes per hour)	Yes	No
ACTU_WOS_T_4780	WOS	Da Silva, Deffaci, Hartmann, & Hartmann. (2017). Birds around the road: effects of a road on a savannah bird community in southern Brazil. Ornitologia Neotropical, 28, 119–128.	NA	Article	English	Q2	CE	Low	Brazil	Espinilho State Park, Barro do Quarai, Rio Grande Sul, southern Brazil	30°11'51''S, 57°29'46''W	Birds	Roads	Savannah, marginal strip of the road	Savannah, 250 m or 500 m away from the road	Species richness, abundance, species composition (Jaccard similarity coefficient)	Yes	Yes
ACTU_WOS_T_9210	WOS	Day, J., Baker, J., Schofield, H., Mathews, F., & Gaston, K. J. (2015). Part-night lighting: implications for bat conservation. Animal Conservation, 18(6), 512–516.	10.1111/acv.12200	Article	English	Q1	CI	Medium	United Kingdom	South West England	NA	Bats	Roads	Roadside hedges	Eight part-night lighting scenario (lighting until from 10 PM to 5 AM)	Passage frequency	Yes	No
ACTU_WOS_T_9641	WOS	de Torre, R., Jimenez, M. D., Ramirez, A., Mola, I., Casado, M. A., & Balaguer, L. (2015). Use of restoration plantings to enhance bird seed dispersal at the roadside: failures and prospects. Journal of Environmental Engineering and Landscape Management, 23(4), 302–311.	10.3846/16486897.2015.1079529	Article	English	Q1	CI	Medium	Spain	central Spain, Madrid, El Molar	40°44'N, 3°35'W	Birds	Roads	Highway embankments	- Embankments with plantings - Embankments without plantings	Species richness, species density	Yes	No
WOS_7311	WOS	Delgado, J. D., Arevalo, J. R., & Fernandez-Palacios, J. M. (2001). Road and topography effects on invasion: edge effects in rat foraging patterns in two oceanic island forests (Tenerife, Canary Islands). Ecography, 24, 539–546.	10.1034/j.1600-0587.2001.d01-209.x	Article	English	Q2	CE	Medium	Spain	NE Tenerife (Canary Island)	28°19'N, 16°34'W	Small mammals	Roads	Forest road edge	Forest 100 m from road	Bait removal rates	Yes	No
WOS_7311	WOS	Delgado, J. D., Arevalo, J. R., & Fernandez-Palacios, J. M. (2001). Road and topography effects on invasion: edge effects in rat foraging patterns in two oceanic island forests (Tenerife, Canary Islands). Ecography, 24, 539–546.	10.1034/j.1600-0587.2001.d01-209.x	Article	English	Q5	CE	Low	Spain	NE Tenerife (Canary Island)	28°19'N, 16°34'W	Small mammals	Roads	Roadside	Types of landscape: Laurel forest, Pine forest	Bait removal rates	No	No
WOS_7314	WOS	Delgado, Juan D., Arevalo, J. R., & Maria Fernandez-Palacios, J. (2008). Bird communities in two oceanic island forests fragmented by roads on Tenerife, Canary Islands. Ostrich, 79(2), 219–226.	10.2989/ostrich.2008.79.2.14.588	Article	English	Q2	CE	Medium	Spain	Canary Islands	28-29°N, 16-17°W	Birds	Roads	Laurel forest along asphalt roads	Laurel forest along unpaved roads	density, species richness, shannon index, Simpson index, Evenness	Yes	Yes
WOS_7337	WOS	Dell’Omo, G., Costantini, D., Lucini, V., Antonucci, G., Nonno, R., & Polichetti, A. (2009). Magnetic fields produced by power lines do not affect growth, serum melatonin, leukocytes and fledging success in wild kestrels. Comparative Biochemistry and Physiology Part C: Toxicology & Pharmacology, 150(3), 372–376.	10.1016/j.cbpc.2009.06.002	Article	English	Q2	CE	Medium	Italy	1200 km2 area around Rome	NA	Birds	Powerlines	Open agricultural land, nest-boxes attached to high voltage powerline tower	Open agricultural land, nest-boxes attached to abandoned transmission towers, non-electric pylons or abandoned buildings	Ultimate breeding success (number of fledgings per brood, fledging success (number of fledglings per brood/number of hatched chicks per brood), %))	Yes	No
WOS_7800	WOS	Doherty, P. F., & Grubb, T. C. (1998). Reproductive Success of Cavity-Nesting Birds Breeding under High-Voltage Powerlines. The American Midland Naturalist, 140(1), 122–128.	10.1674/0003-0031(1998)140[0122:RSOCNB]2.0.CO;2	Article	English	Q2	CE	Medium	United States of America	Ohio (Delaware County, Warren County, and Seneca County)	NA	Birds	Powerlines	Powerline corridor	Paired reference sites with similar vegetation	Ultimate breeding success (number of fledgings), reproductive success (number of fledged/clutch size)	Yes	No
WOS_8548	WOS	Ellis, A. M., Patton, L. L., & Castleberry, S. B. (2002). Bat activity in upland and riparian habitats in the Georgia piedmont. Proceedings of the Annual Conference SEAFWA, 56, 210–218.	NA	Book chapter	English	Q2	CE	Medium	United States of America	Georgia, Piedmont, Oconee National Forest	3338N, 8317W	Bats	Waterways	Riparian forest along river	Riparian forest along creeks	Species richness (mean number of species per sampling period), activity (mean number of call/sampling period)	Yes	Yes
WOS_8824	WOS	Evans, D. R., & Gates, J. E. (1997). Cowbird Selection of Breeding Areas: The Role of Habitat and Bird Species Abundance. The Wilson Bulletin, 109(3), 470–480.	NA	Article	English	Q2	CE	Low	United States of America	Green Ridge State Forest in eastern Allegany County, Maryland	NA	Birds	Powerlines	Forest-powerline corridor edge	Forest-brush edge	Species richness, abundance of all birds and all without cowbirds (= host birds)	Yes	Yes
WOS_8980	WOS	Farago, S., & Hangya, K. (2012). Effects of water level on waterbird abundance and diversity along the middle section of the Danube River. Hydrobiologia, 697, 15–21.	10.1007/s10750-012-1166-1	Article	English	Q1	CI	Medium	Hungary / Slovakia	Frontier between the two countries	NA	Birds	Waterways	Riverbanks	Varying water levels (from 33 to 558 cm)	Abundance, Species Richness, Shannon index	Yes	No
WOS_9450	WOS	Flaquer, C., Puig-Montserrat, X., Goiti, U., Vidal, F., Curco, A., & Russo, D. (2009). Habitat selection in Nathusius’ pipistrelle (Pipistrellus nathusii): the importance of wetlands. Acta Chiropterologica, 11(1), 149–155.	10.3161/150811009x465767	Article	English	Q2	CE	Medium	Spain	Catalonia, Ebro Delta Natural Park, Illa de Buda	0°50'E, 40°42'N	Bats	Waterways	River banks	Lagoons	Radiotelemetry GPS coordinates	No	No
WOS_9687	WOS	Fox, A. (1999). The role of habitat enhancement in the return of the European otter (Lutra lutra) to Northumberland. Journal of the Chartered Institution of Water and Environmental Management, 13, 79–83.	10.1111/j.1747-6593.1999.tb01012.x	Article	English	Q1	BAI	Medium	United Kingdom	Northumberland county	NA	Other mammals	Waterways	Riverbanks	- After habitat improvement - Before habitat improvement	Species occurrence	Yes	No
WOS_10004	WOS	Fuller, R. J., Chamberlain, D. E., Burton, N. H. K., & Gough, S. J. (2001). Distributions of birds in lowland agricultural landscapes of England and Wales: How distinctive are bird communities of hedgerows and woodland? Agriculture Ecosystems & Environment, 84, 79–92.	10.1016/s0167-8809(00)00194-8	Article	English	Q2	CE	Medium	United Kingdom	England and Wales	NA	Birds	Roads	Roadside hedgerows	Non roadside hedgerows	Species richness	No	Yes
WOS_10033	WOS	Fustec, J., Cormier, J. P., & Lode, T. (2003). Beaver lodge location on the upstream Loire River. Comptes Rendus Biologies, 326, S192–S199.	10.1016/s1631-0691(03)00057-x	Article	English	Q1	CI	Medium	France	Loire valley, east of Angers city	NA	Other mammals	Waterways	Riverbanks	- Bank protected by ripraps - Bank without ripraps	Species occurrence	No	No
WOS_10355	WOS	Gatesire, T., Nsabimana, D., Nyiramana, A., Seburanga, J. L., & Mirville, M. O. (2014). Bird Diversity and Distribution in relation to Urban Landscape Types in Northern Rwanda. The Scientific World Journal, 157824, 1–12.	10.1155/2014/157824	Article	English	Q2	CE	Medium	Rwanda	Northern Province, Musanze city	NA	Birds	Waterways	Riversides (open field)	Riversides (open field)	Abundance, species richness, Shannon index	Yes	Yes
WOS_10411	WOS	Geerts, S., & Pauw, A. (2011). Easy technique for assessing pollination rates in the genus Erica reveals road impact on bird pollination in the Cape fynbos, South Africa. Austral Ecology, 36, 656–662.	10.1111/j.1442-9993.2010.02201.x	Article	English	Q2	CE	Medium	South Africa	Betties Bay	34°21'38.8''S, 18°52'27.6''E	Birds	Roads	Erica perspicua flowers 0-10 m from road edge	Erica perspicua flowers 40-50 m from road edge	Bird pollination rate (index of bird activity)	Yes	No
ACTU_WOS_T_7534	WOS	Gonzalez-Gallina, A., Benitez-Badillo, G., Hidalgo-Mihart, M. G., Equihua, M., & Rojas-Soto, O. R. (2016). Roadkills as a complementary information source for biological surveys using rodents as a model. Journal of Mammalogy, 97(1), 145–154.	10.1093/jmammal/gyv165	Article	English	Q5	CE	Medium	Mexico	State of Veracruz	from (19°31′34.99′′N, 97°24′22.86′′W) to (19°34′18.08′′N, 97°17′4.39′′W)	Small mammals	Roads	Roadside	Types of landscape: Grassland or seasonal agricultural crops, Shrubland on lava flow	Species occurrence	No	No
WOS_11059	WOS	Goosem, M., & Marsh, H. (1997). Fragmentation of a Small-mammal Community by a Powerline Corridor through Tropical Rainforest. Wildlife Research, 24(5), 613–629.	10.1071/wr96063	Article	English	Q2	CE	Low	Australia	North-eastern Queensland	17°37'S, 145°48'E	Small mammals	Powerlines	Powerline corridor, 10 or 30 m from edge	Adjacent rainforest, 110 m from edge	Species presence, abundance	No	Yes
ACTU_GREY_LITT_59	GREY_LITT_FrontiersIn	Grace, M. K., Smith, D. J., & Noss, R. F. (2017). Roadside Abundance of Anurans within a Community Correlates with Reproductive Investment. Frontiers in Ecology and Evolution, 5(65).	10.3389/fevo.2017.00065	Article	English	Q2	CE	Medium	United States of America	Florida, Ocala	NA	Amphibians	Roads	Wet pine flatwoods, hardwood swamp, or upland mixed hardwood-pine forest 10-20 m from the road surface	Wet pine flatwoods, hardwood swamp, or upland mixed hardwood-pine forest 500 m from the road	Proportion of individuals	No	No
ZR_13096	ZR	Guiller, G. (2009). Railway lines: an alternative for preserving snakes. Bull. Soc. Sc. Nat. Ouest de La France, 31(1), 1–21.	NA	Article	French	Q5	CE	Medium	France	Loire Atlantique	NA	Reptiles	Railways	Abandonned railway	Types of landscape: Openfield, Wooded countryside	Abundance	No	No
WOS_12532	WOS	Hein, C. D., Castleberry, S. B., & Miller, K. V. (2009). Site-occupancy of bats in relation to forested corridors. Forest Ecology and Management, 257, 1200–1207.	10.1016/j.foreco.2008.09.054	Article	English	Q2	CE	Medium	United States of America	MeadWestvaco Corporation’s South Region, southern South Carolina	NA	Bats	Roads	Visual corridors located along public roads	Forested corridor	Species occurrence	Yes	No
ZR_3720	ZR	Heitmeyer, M. E. (1986). Postbreeding distribution and habitat use of wading birds in Oklahoma, USA. Colonial Waterbirds, 9(2), 163–170.	10.2307/1521209	Article	English	Q2	CE	Medium	United States of America	Oklahoma	NA	Birds	Waterways	Riverine wetlands	Lacustrine wetlands	Abundance	No	No
ACTU_WOS_T_2529	WOS	Hindmarch, S., Elliott, J. E., McCann, S., & Levesque, P. (2017). Habitat use by barn owls across a rural to urban gradient and an assessment of stressors including, habitat loss, rodenticide exposure and road mortality. Landscape and Urban Planning, 164, 132–143.	10.1016/j.landurbplan.2017.04.003	Article	English	Q2	CE	Medium	Canada	Bristish Columbia, Lower Mainland	49°8'0''N, 122°18'0''W	Birds	Roads	Roadside grass verge	Field margin (grass)	Radiotelemetry GPS coordinates	Yes	No
ACTU_WOS_T_5308	WOS	Hinton, J. W., Proctor, C., Kelly, M. J., van Manen, F. T., Vaughan, M. R., & Chamberlain, M. J. (2016). Space Use and Habitat Selection by Resident and Transient Red Wolves (Canis rufus). Plos One, 11(12).	10.1371/journal.pone.0167603	Article	English	Q4	CE	Medium	United States of America	Eastern North Carolina, Albemarle Peninsula	NA	Other mammals	Roads	Roadsides	Habitat edges	Radiotelemetry GPS coordinates	Yes	No
ACTU_WOS_T_9480	WOS	Holbrook, J. D., Vierling, K. T., Vierling, L. A., Hudak, A. T., & Adam, P. (2015). Occupancy of red-naped sapsuckers in a coniferous forest: using LiDAR to understand effects of vegetation structure and disturbance. Ecology and Evolution, 5(22), 5383–5393.	10.1002/ece3.1768	Article	English	Q2	CE	Medium	United States of America	northern Idaho, Moscow Mountain	46.803 (Latitude) -116.868 (Longitude)	Birds	Roads	Forest, distance to road (continuous variable)	Forest, distance to road (continuous variable)	Species occurrence	Yes	No
ZR_13504	ZR	Holm, T. E., & Laursen, K. (2011). Car traffic along hedgerows affects breeding success of Great Tits Parus major. Bird Study, 58(4), 512–515.	10.1080/00063657.2011.596186	Article	English	Q2	CE	Medium	Denmark	Eastern Jutland, Mols Bjerge National Park	NA	Birds	Roads	Hedgerows between crop fields and roads	Hedgerows between crop fields and dirt roads	Ultimate breeding success (number of fledglings)	Yes	No
ACTU_WOS_T_10395	WOS	Janiszewski, T., Minias, P., & Wojciechowski, Z. (2015). Selective forces responsible for transition to nesting on electricity poles in the White Stork Ciconia ciconia. Ardea, 103(1), 39–50.	10.5253/arde.v103i1.a4	Article	English	Q5	CE	Medium	Poland	Lowicz district, central Poland	52°06'N, 19°56'E	Birds	Powerlines	Electricity poles	Types of landscape: low quality (LQA), medium quality (MQA), high quality (HQA)	Reproductive success (number of fledglings)	Yes	No
ACTU_WOS_T_1552	WOS	Jumeau, J., Boucharel, P., Handrich, Y., & Burel, F. (2017). Road-related landscape elements as a habitat: A main asset for small mammals in an intensive farming landscape. Basic and Applied Ecology, 25, 15–27.	10.1016/j.baae.2017.09.013	Article	English	Q2	CE	Medium	France	Bas-Rhin	48°35'31.5''N, 7°38'49.6''E	Small mammals	Roads	Grassy road verges	Wheat field	Abundance	Yes	Yes
ACTU_WOS_T_5390	WOS	Kaczmarski, M., & Kaczmarek, J. M. (2016). Heavy traffic, low mortality - tram tracks as terrestrial habitat of newts. ACTA HERPETOLOGICA, 11(2), 227–231.	10.13128/Acta_Herpetol-17922	Article	English	Q2	CE	Medium	Poland	Poznan city	52°23'31.1''N, 16°58'33.5''E	Amphibians	Railways	Edge of tram tracks	Park trails	Abundance	No	No
ZR_14230	ZR	Kolb, H. H. (1984). Factors affecting the movements of dog foxes in Edinburgh. Journal of Applied Ecology, 21, 161–173.	10.2307/2403044	Article	English	Q4	CE	Medium	United Kingdom	Scotland, Edimburg	NA	Other mammals	Railways	Railway lines	Road or river sides	Direction of dispersal	No	No
ZR_14269	ZR	Kosiński, Z. (2001). The breeding ecology of the Greenfinch Carduelis chloris in urban conditions (study in Krotoszyn, W Poland). Acta Ornithologica, 36(2), 111–121.	10.3161/068.036.0203	Article	English	Q2	CE	Medium	Poland	medium size town Krotoszyn	51°41'N, 17°26'E	Birds	Roads	Trees along roads	Trees in squares, old parks and alleys	Number of nests	No	No
WOS_16416	WOS	Kroodsma, R. L. (1987). Edge Effect on Breeding Birds along Power-line Corridors in East Tennessee. The American Midland Naturalist, 118(2), 275–283.	10.2307/2425785	Article	English	Q2	CE	Low	United States of America	East Tenessee	NA	Birds	Powerlines	Powerline corridor	Adjacent forest	Bird density, species richness, density corridor bird, density forest bird	No	Yes
ZR_5027	ZR	Langton, S. D., Briggs, P. A., & Haysom, K. A. (2010). Daubenton’s bat distribution along rivers - developing and testing a predictive model. Aquatic Conservation-Marine and Freshwater Ecosystems, 20, S45–S54.	10.1002/aqc.1077	Article	English	Q5	CE	Medium	United Kingdom	England and Wales	NA	Bats	Waterways	Riverbank	% built land, % woodland, % arable land, in 1 km square	Number of bat passes	Yes	No
WOS_17144	WOS	Law, B. S., Chidel, M., & Tap, P. (2011). Bat activity in ephemeral stream-beds in the Pilliga forests: clarifying the importance of flyways and buffer widths in open forest and woodland. In Other RZS NSW Publications. The Biology and Conservation of Australasian Bats (Vols. 1–0, pp. 308–321).	10.7882/FS.2011.031	Book chapter	English	Q2	CE	Medium	Australia	Northwest New South Wales, State forests of the Pilliga area, Southern Brigalow Belt bioregion	NA	Bats	Waterways	0 m from stream-bed	200 m from stream-bed	(Passage frequency) species composition, activity	Yes	Yes
WOS_17545	WOS	León, V. A., Fraschina, J., Guidobono, J. S., & Busch, M. (2013). Habitat use and demography of Mus musculus in a rural landscape of Argentina. Integrative Zoology, 8 Suppl 1, 18–29.	10.1111/j.1749-4877.2012.00290.x	Article	English	Q2	CE	Medium	Argentina	Department of Exaltación de la Cruz, Buenos Aires province	34°18′S, 59°14′E	Small mammals	Railways	Herbaceous vegetation and trees, railway embankments	Weed community, borders of cropfields and pastures	Abundance	Yes	Yes
ZR_5308	ZR	Lintott, P. R., Bunnefeld, N., & Park, K. J. (2015). Opportunities for improving the foraging potential of urban waterways for bats. Biological Conservation, 191, 224–233.	10.1016/j.biocon.2015.06.036	Article	English	Q5	CE	Low	United Kingdom	NA	NA	Bats	Waterways	Riverbank	% grey space, % woodland, in 1 or 3 km buffer	Bat activity (passage number)	Yes	No
WOS_18343	WOS	Lloyd, A., Law, B., & Goldingay, R. (2006). Bat activity on riparian zones and upper slopes in Australian timber production forests and the effectiveness of riparian buffers. Biological Conservation, 129, 207–220.	10.1016/j.biocon.2005.10.035	Article	English	Q2	CE	Medium	Australia	New South Wales, Coffs Harbour region	30°18'S, 153°07'E	Bats	Waterways	Riparian forest, 4th order stream	Riparian forest, 1st order stream	Passage frequency (number of passes per hour of darkness), Species richness	Yes	Yes
WOS_18364	WOS	Lock, P. A., & Naiman, R. J. (1998). Effects of stream size on bird community structure in coastal temperate forests of the Pacific Northwest, USA. Journal of Biogeography, 25, 773–782.	10.1046/j.1365-2699.1998.2540773.x	Article	English	Q2	CE	Low	United States of America	Washington, Olympic peninsula	NA	Birds	Waterways	Forest, 5th or 6th order stream	Forest, 2nd or 3rd order stream	Species richness, Abundance (number of birds observed per station per day)	Yes	Yes
ACTU_WOS_F_1319	WOS	Lopez-Baucells, A., Casanova, L., Puig-Montserrat, X., Espinal, A., Paramo, F., & Flaquer, C. (2017). Evaluating the use of Myotis daubentonii as an ecological indicator in Mediterranean riparian habitats. Ecological Indicators, 74, 19–27.	10.1016/j.ecolind.2016.11.012	Article	English	Q5	CE	Low	Spain	NE Spain	NA	Bats	Waterways	Riverbank	% urban cover, % forest cover, in 1 or 5 km radius	Species presence	Yes	No
EM_304_3	GREY_LITT_email_request	Mallard, F. (2014). Chapitre IV. Etudes de sensibilité de quatre indicateurs biotiques potentiels des habitats forestiers. In Thèse de doctorat Ecole Centrale de Nantes. Développement d’une méthode d’évaluation quantitative des effets des projets d’infrastructures de transport terrestre sur les milieux naturels.	NA	PhD thesis chapter	French	Q2	CE	Medium	France	Sarthe, Orne	48°24'20''N, 0°15''E ; 48°32'42''N, 0°3'53''E	Bats	Roads	Forest road edge	Forest track edge	Passage frequency ; species richness ; Shannon index	Yes	Yes
WOS_19221	WOS	Maltchik, L., Peixoto, C. D., Stenert, C., Moreira, L. F. B., & Mochado, I. F. (2008). Dynamics of the terrestrial amphibian assemblage in a flooded riparian forest fragment in a Neotropical region in the south of Brazil. Brazilian Journal of Biology, 68(4), 763–769.	10.1590/S1519-69842008000400010	Article	English	Q2	CE	Medium	Brazil	South Brazil, State of Rio Grande do Sul	29°16'14''S, 49°50'53''W	Amphibians	Waterways	Forest, 20 m from the main channel	Forest, 120 m from the main channel	Species richness, Abundance	Yes	Yes
WOS_19431	WOS	Marini, M. A., Robinson, S. K., & Heske, E. J. (1995). Edge effects on nest predation in the Shawnee National Forest, Southern Illinois. Biological Conservation, 74, 203–213.	10.1016/0006-3207(95)00032-y	Article	English	Q2	CE	Medium	United States of America	Illinois	NA	Birds, Mammals	Roads	Forest along a road	Forest along a ravine	Predation level	No	No
WOS_20186	WOS	McNair, D. B. (2013). Cliff Swallow Breeding Range Expansion along the Great Pee Dee River Corridor in the Carolinas. Southeastern Naturalist, 12(3), 500–513.	10.1656/058.012.0307	Article	English	Q2	CE	Medium	United States of America	North Carolina, South Carolina	NA	Birds	Waterways	Bridge site over or along the river	Bridge sites near the river	Number of active nests	No	No
WOS_20526	WOS	Meunier, F. D., Corbin, J., Verheyden, C., & Jouventin, P. (1999). Effects of landscape type and extensive management on use of motorway roadsides by small mammals. Canadian Journal of Zoology, 77, 108–117.	10.1139/cjz-77-1-108	Article	English	Q1	CI	Medium	France	Mediterranean region; southwestern France; western France	43°80'N, 4°38'E; 44°39'N, 0°26'W; 46°13'N, 0°27'W	Small mammals	Roads	Road verges	- Mowed strip - Unmowed strip	Abundance (number of captures per 60 trap-nights)	Yes	No
WOS_20526	WOS	Meunier, F. D., Corbin, J., Verheyden, C., & Jouventin, P. (1999). Effects of landscape type and extensive management on use of motorway roadsides by small mammals. Canadian Journal of Zoology, 77, 108–117.	10.1139/cjz-77-1-108	Article	English	Q2	CE	Medium	France	Mediterranean region; southwestern France; western France	43°80'N, 4°38'E; 44°39'N, 0°26'W; 46°13'N, 0°27'W	Small mammals	Roads	Highway verges	Landscape matrix 200 m from road	Abundance (number of captures per 60 trap-nights)	Yes	Yes
WOS_20526	WOS	Meunier, F. D., Corbin, J., Verheyden, C., & Jouventin, P. (1999). Effects of landscape type and extensive management on use of motorway roadsides by small mammals. Canadian Journal of Zoology, 77, 108–117.	10.1139/cjz-77-1-108	Article	English	Q5	CE	Medium	France	Mediterranean region; southwestern France; western France	43°80'N, 4°38'E; 44°39'N, 0°26'W; 46°13'N, 0°27'W	Small mammals	Roads	Road verges	Types of landscape: garrigue (matoral), plantation (woodland), farmland	Abundance (number of captures per 60 trap-nights)	No	No
WOS_20527	WOS	Meunier, F. D., Verheyden, C., & Jouventin, P. (1999). Bird communities of highway verges: Influence of adjacent habitat and roadside management. Acta Oecologica, 20(1), 1–13.	10.1016/s1146-609x(99)80010-1	Article	English	Q2	CE	Medium	France	Mediterranean region; southwestern France; western France	43°80'N, 4°38'E; 44°39'N, 0°26'W; 46°13'N, 0°27'W	Birds	Roads	Highway verges	Landscape matrix 200 or 300 m from road	Abundance, species richness	Yes	Yes
WOS_20527	WOS	Meunier, F. D., Verheyden, C., & Jouventin, P. (1999). Bird communities of highway verges: Influence of adjacent habitat and roadside management. Acta Oecologica, 20(1), 1–13.	10.1016/s1146-609x(99)80010-1	Article	English	Q5	CE	Medium	France	Mediterranean region; southwestern France; western France	43°80'N, 4°38'E; 44°39'N, 0°26'W; 46°13'N, 0°27'W	Birds	Roads	Road verges	Types of landscape: garrigue (matoral), plantation (woodland), farmland	Abundance, species richness, species composition	Yes	No
WOS_20980	WOS	Moffatt, K. C., Crone, E. E., Holl, K. D., Schlorff, R. W., & Garrison, B. A. (2005). Importance of hydrologic and landscape heterogeneity for restoring bank swallow (Riparia riparia) colonies along the Sacramento River, California. Restoration Ecology, 13(2), 391–402.	10.1111/j.1526-100X.2005.00049.x	Article	english	Q1	CI	Medium	United States of America	California	NA	Birds	Waterways	Riverbanks	Varying maximum river discharge (from c. 500 m3/s to 3000 m3/s)	Species occurrence (Colonization probability, extinction probability (colony level))	Yes	No
WOS_21289	WOS	Morgan, G. M., Boughton, R. K., Rensel, M. A., & Schoech, S. J. (2010). Road effects on food availability and energetic intake in Florida Scrub-Jays (Aphelocoma coerulescens). The Auk, 127(3), 581–589.	10.1525/auk.2010.09033	Article	english	Q2	CE	Medium	United States of America	South-central Florida	27°10'N, 81°21'W	Birds	Roads	Road edge	Pasture edge	Abundance	No	Yes
WOS_21633	WOS	Murphy, E. C., & Dowding, J. E. (1994). Range and diet of stoats (Mustela erminea) in a New-Zealand beech forest. New Zealand Journal of Ecology, 18(1), 11–18.	NA	Article	english	Q2	CE	Medium	New Zealand	Fiordland National Park, Eglinton Valley	44°50'S, 168°05'E	Other mammals	Roads	Forest strip along road	Forest margin (edge)	Radiotelemetry GPS coordinates	No	No
ACTU_WOS_T_2043	WOS	Myczko, L., Sparks, T. H., Skorka, P., Rosin, Z. M., Kwiecinski, Z., Gorecki, M. T., & Tryjanowski, P. (2017). Effects of local roads and car traffic on the occurrence pattern and foraging behaviour of bats. Transportation Research Part D-Transport and Environment, 56, 222–228.	10.1016/j.trd.2017.08.011	Article	English	Q2	CE	Medium	Poland	Western Poland, Wielkopolska region	51°29' - 53°01' N , 16°49' - 17°48' E	Bats	Roads	Asphalt road sites	Paired reference sites 100 m from the road on unsurfaced forest roads	Abundance (number of bat passes = proxy for bat abundance), species richness (number of bat taxa = proxy for species richness as some bats could only be identified at the genus level)	Yes	Yes
ACTU_WOS_T_540	WOS	Niu, H. Y., Xing, J. J., Zhang, H. M., Wang, D., & Wang, X. R. (2018). Roads limit of seed dispersal and seedling recruitment of Quercus chenii in an urban hillside forest. Urban Forestry & Urban Greening, 30, 307–314.	10.1016/j.ufug.2018.01.023	Article	English	Q2	CE	Medium	China	Jiufeng Hill Forest Park, Wuhan, Hubei Province	30°30'33''-30°31'04''N, 114°29'50''-14°30'26''E	Birds, Mammals	Roads	Forest 5 m from road	Forest 100-150 m from road	Seed removal rate	Yes	No
WOS_22619	WOS	O’Donnell, C. F. J., & Christie, J. E. (2006). Habitat use and nocturnal activity of lesser short-tailed bats (Mystacina tuberculata) in comparison with long-tailed bats (Chalinolobus tuberculatus) in temperate rainforest. New Zealand Journal of Zoology, 33(2), 113–124.	10.1080/03014223.2006.9518435	Article	english	Q2	CE	Medium	New Zealand	Fiordland National Park, Eglinton Valley	44°58'S, 168°00'E	Bats	Roads	Forest-road edge	Forest-grassland edge	Number of bats passes per night	Yes	Yes
ACTU_WOS_F_3662	WOS	Owen, S. F., Berl, J. L., Edwards, J. W., Ford, W. M., & Wood, P. B. (2015). Raccoon Spatial Requirements and Multi-Scale Habitat Selection within an Intensively Managed Central Appalachian Forest. American Midland Naturalist, 174(1), 87–95.	10.1674/0003-0031-174.1.87	Article	English	Q2	CE	Medium	United States of America	West Virginia, Randolph County, MeadWestvaco Wildlife and Ecosystem Research Forest	38°42'N, 80°3'W	Other mammals	Roads	Road habitat	Open/non-forest areas	Radiotelemetry GPS coordinates	Yes	No
WOS_23921	WOS	Pescador, M., & Peris, S. (2007). Influence of roads on bird nest predation: An experimental study in the Iberian Peninsula. Landscape and Urban Planning, 82, 66–71.	10.1016/j.landurbplan.2007.01.017	Article	english	Q2	CE	Low	Spain	Province of Salamanca (west-central Spain)	41°15'N, 6°35'W	Unknown	Roads	Wooded pasturelands 0 – 5 m from road	Wooded pasturelands more than 100 m from road	Predation rate (%)	Yes	No
ZR_7014	ZR	Petit, L. J., & Petit, D. R. (1996). Factors governing habitat selection by prothonotary warblers: field tests of the Fretwell-Lucas models. Ecological Monographs, 66(3), 367–387.	10.2307/2963523	Article	English	Q2	CE	Medium	United States of America	Tennessee, Benton county	NA	Birds	Waterways	Shoreline	70 and 105 m from water	Density (number of pairs of breeding birds)	Yes	Yes
ZR_16241	ZR	Pocock, Z., & Lawrence, R. E. (2006). How far into a forest does the effect of a road extend? Defining road edge effect in eucalypt forests of south-eastern Australia. ICOET 2005 Proceedings, (9), 397–405.	NA	Book chapter	english	Q2	CE	Medium	Australia	South-eastern Australia, Bendigo Regional Park	NA	Birds, Other mammals	Roads	Roadside	1000 m from road	Species richness (+abundance for birds)	No	No
WOS_24754	WOS	Prunier, J. G., Kaufmann, B., Léna, J.-P., Fenet, S., Pompanon, F., & Joly, P. (2014). A 40-year-old divided highway does not prevent gene flow in the alpine newt Ichthyosaura alpestris. Conservation Genetics, 15(2), 453–468.	10.1007/s10592-013-0553-0	Article	English	Q4	CE	Medium	France	Bourgogne region/Massif of Le Morvan, Plateau of l'Auxois and Plain of Terre-Plaine	NA	Amphibians	Roads and railways	Distance along highways	Genetic distance	Genetic distances, Mean number of genotypes per site	No	No
ACTU_WOS_F_3623	WOS	Rabearivony, J., Brady, L. D., Jenkins, R. K., Griffiths, R. A., Raselimanana, A. P., Bisoa, M., & Raminosoa, R. N. (2015). Influence of riparian habitats on the distribution of rainforest chameleons in Parc National de Ranomafana, Madagascar. African Journal of Herpetology, 64(2), 148–159.	10.1080/21564574.2015.1121930	Article	English	Q2	CE	Low	Madagascar	South-eastern Madagascar, Parc National de Ranomafana	21°15′ S, 47°27′ E	Reptiles	Waterways	Forest riparian edge 0-25 m from the river	Forest interior 25-50 m from the river	Species occurrence	Yes	No
ACTU_WOS_F_2865	WOS	Rachwald, A., Bradford, T., Borowski, Z., & Racey, P. A. (2016). Habitat Preferences of Soprano Pipistrelle Pipistrellus pygmaeus (Leach, 1825) and Common Pipistrelle Pipistrellus pipistrellus (Schreber, 1774) in Two Different Woodlands in North East Scotland. Zoological Studies, 55.	10.6620/zs.2016.55-22	Article	English	Q2	CE	Medium	United Kingdom	North east Scotland, River Dee valley	NA	Bats	Waterways	River-forest ecotones	Meadow-forest ecotones	Passage frequency (number of passes)	Yes	Yes
WOS_25663	WOS	Rich, A. C., Dobkin, D. S., & Niles, L. J. (1994). Defining Forest Fragmentation by Corridor Width: The Influence of Narrow Forest-Dividing Corridors on Forest-Nesting Birds in Southern New Jersey. Conservation Biology, 8(4), 1109–1121.	10.1046/j.1523-1739.1994.08041109.x	Article	English	Q2	CE	Low	United States of America	New Jersey state/Cumberland and Cape May counties	NA	Birds	Roads and powerlines	Forest edges along paved secondary roads	Forest edges along unpaved roads	Species richness, Relative abundance	Yes	Yes
ZR_16736	ZR	Robley, A., Gormley, A., Forsyth, D. M., Wilton, A. N., & Stephens, D. (2010). Movements and habitat selection by wild dogs in eastern Victoria. Australian Mammalogy, 32, 23–32.	10.1071/AM09030	Article	English	Q4	CE	Low	Australia	Eastern Victoria	37°7'S, 147°56'E	Other mammals	Roads	Roadsides	Watercourses sides	Radiotelemetry GPS coordinates	Yes	No
ZR_16744	ZR	Roche, N., Langton, S., & Aughney, T. (2012). Car-based Bat Monitoring in Ireland 2003-2011. Irish Wildlife Manuals, (60).	NA	Article	english	Q1	CI	Medium	Ireland	All	NA	Bats	Roads	Roadsides	- Lit roads with orange, yellow or white lights - Unlit roads	Passage frequency	Yes	No
WOS_26373	WOS	Rotholz, E., & Mandelik, Y. (2013). Roadside habitats: effects on diversity and composition of plant, arthropod, and small mammal communities. Biodiversity and Conservation, 22(4), 1017–1031.	10.1007/s10531-013-0465-9	Article	English	Q2	CE	Low	Israel	Jerusalem mountains and the Judean foothills	NA	Small mammals	Roads	Shrubland, road edge	Shrubland, from 550 to 1700 m from road	Species richness, abundance, species composition	Yes	Yes
WOS_26426	WOS	Royan, A., Hannah, D. M., Reynolds, S. J., Noble, D. G., & Sadler, J. P. (2013). Avian Community Responses to Variability in River Hydrology. Plos One, 8(12), e83221.	10.1371/journal.pone.0083221	Article	english	Q1	CI	Medium	United Kingdom	Great Britain	NA	Birds	Waterways	Riverbanks	Varying mean daily flow (from 0.2 to 117.8 m3)	Species occurrence	Yes	No
WOS_26557	WOS	Russ, J. M., & Montgomery, W. I. (2002). Habitat associations of bats in Northern Ireland: implications for conservation. Biological Conservation, 108, 49–58.	10.1016/s0006-3207(02)00089-7	Article	english	Q2	CE	Low	United Kingdom	Northern Ireland	NA	Bats	Waterways	Banks of rivers/canals	Banks along streams	Species occurrence	No	No
WOS_26679	WOS	Sabino-Marques, H., & Mira, A. (2011). Living on the verge: are roads a more suitable refuge for small mammals than streams in Mediterranean pastureland? Ecological Research, 26, 277–287.	10.1007/s11284-010-0781-4	Article	English	Q2	CE	Low	Portugal	Southern Portugal, vicinity of Evora	38°28'N, 8°02'W ; 38°29'N, 8°02'W ; 38°39'N, 8°01'W ; 38°40'N, 8°01'W	Small mammals	Roads	Road verges	Surrounding matrix	Species composition, Abundance index (ratio of the number of individuals caught at each trap to the number of functional trap-nights), Abundance ? (number of captures)	No	No
WOS_27048	WOS	Santos, M. J., Matos, H. M., Palomares, F., & Santos-Reis, M. (2011). Factors affecting mammalian carnivore use of riparian ecosystems in Mediterranean climates. Journal of Mammalogy, 92(5), 1060–1069.	10.1644/10-mamm-a-009.1	Article	English	Q2	CE	Low	Portugal	Southern Portugal, Alentejo region	38°19'N, 8°12'W	Other mammals	Waterways	Riparian vegetation along rivers	Riparian vegetation along creeks	Species occurrence	No	No
WOS_27057	WOS	Santos, S. M., Mathias, M. da L., Mira, A., & Simoes, M. P. (2007). Vegetation structure and composition of road verge and meadow sites colonized by cabrera vole (Microtus Cabrerae Thomas). Polish Journal of Ecology, 55(3), 481–493.	NA	Article	English	Q2	CE	Medium	Portugal	Southern Portugal (Alandroal, Mora, Ciborro, Cabrela, Grandola)	38°08'N-38°55'N, 7°25'W-8°25'W	Small mammals	Roads	Road verge sites	Meadow sites at least 80 m away from any road	Index of abundance (abundance class)	Yes	No
WOS_27224	WOS	Scarpignato, A. L., & George, T. L. (2013). Space use by Common Ravens in Marbled Murrelet nesting habitat in Northern California. Journal of Field Ornithology, 84(2), 147–159.	10.1111/jofo.12013	Article	English	Q2	CE	Medium	United States of America	California, Humboldt county, Redwood National and State Park	41°24'N, 124°01'W	Birds	Roads	Forest, distance to road (continuous variable)	Forest, distance to road (continuous variable)	Radiotelemetry GPS coordinates	Yes	No
WOS_27297	WOS	Scher, O., & Thièry, A. (2005). Odonata, Amphibia and Environmental Characteristics in Motorway Stormwater Retention Ponds (Southern France). Hydrobiologia, 551(1), 237–251.	10.1007/s10750-005-4464-z	Article	English	Q1	CI	Medium	France	along the A7 and A54 motorways in the South-East of France between Orange and Salon-de-Provence (Fig. 1)	Orange (44 °08'N/04°48'E) and Salon-de-Provence (43°38'N/05°05'E)	Amphibians	Roads	Highway storm water retention pond	- Ponds with synthetic bottom - Pond with natural bottom	Species richness	Yes	No
WOS_27297	WOS	Scher, O., & Thièry, A. (2005). Odonata, Amphibia and Environmental Characteristics in Motorway Stormwater Retention Ponds (Southern France). Hydrobiologia, 551(1), 237–251.	10.1007/s10750-005-4464-z	Article	English	Q5	CE	Medium	France	along the A7 and A54 motorways in the South-East of France between Orange and Salon-de-Provence (Fig. 1)	Orange (44 °08'N/04°48'E) and Salon-de-Provence (43°38'N/05°05'E)	Amphibians	Roads	Highway storm water retention pond	% built surface in 4 km² square centered on each pond	Species richness	Yes	No
WOS_28751	WOS	Smith, M. B., Aborn, D. A., Gaudin, T. J., & Tucker, J. C. (2008). Mammalian Predator Distribution around a Transmission Line. Southeastern Naturalist, 7(2), 289–300.	10.1656/1528-7092(2008)7[289:MPDAAT]2.0.CO;2	Article	English	Q2	CE	Medium	United States of America	North Chickamauga Creek Gorge State Natural Area, Hamilton County, Tenessee	NA	Other mammals	Powerlines	Powerline corridor (early successional vegetation)	Adjacent forest	Index of abundance (Number of visits)	Yes	No
ZR_8498	ZR	Smith, T. L. (2006). A small scale study into the foraging habitat selection of Myotis and Pipistrellus spp. along the Forth & Clyde Canal, Scotland. BaTML Publications, 3, 2–18.	NA	Article	English	Q5	CE	Medium	United Kingdom	Central Scotland	NA	Bats	Waterways	Banks of canals	Types of landscape: Arable III, Urban, Pastural V	Bat activity (passage number)	No	No
ACTU_ZR_T_473	ZR	Stewart, R. A., Clark, T. J., Shelton, J., Stringfellow, M., Scott, C., White, S. A., & McCafferty, D. J. (2017). Urban grasslands support threatened water voles. Journal of Urban Ecology, 3(1).	10.1093/jue/jux007	Article	English	Q2	CE	Low	United Kingdom	Scotland, Glasgow city centre	55°53'0.515''N, 4°6'53.467''W	Small mammals	Roads	Grassland, roadside	Grassland, public park or garden	Occurrence (occupancy)	Yes	No
WOS_29978	WOS	Svobodova, J., Salek, M., & Albrecht, T. (2007). Roads do not increase predation on experimental nests in a highly fragmented forest landscape. Folia Zoologica Praha, 56(1), 84.	NA	Article	English	Q4	CE	Low	Czech Republic	Eastern part of the Krusné hory Mts	50°38' - 50°42'N, 13°33' - 13°39'E	Other mammals	Roads	Roadsides	Sides of gravel roads or unstabilized forest paths	Species occurrence/activity (Nest predation)	Yes	No
ACTU_ZR_T_979	ZR	Taillie, P. J., Marcus, J. F., Carpenter, J. P., & Anderson, S. K. (2016). The distribution, persistence, and habitat associations of Bachman’s Sparrow (Peucaea aestivalis) in North Carolina. The Chat, 80(2), 57–71.	NA	Article	english	Q2	CE	Medium	United States of America	North Carolina	NA	Birds	Powerlines	Powerline corridor	Fallow field	Observations	No	No
ZR_8904	ZR	Takeuchi, M., & Koganezawa, M. (1992). Home range and habitat utilisation of the red fox Vulpes vulpes in the Ashio Mountains, central Japan. Journal of the Mammalogical Society of Japan, 17(2), 95–110.	NA	Article	English	Q2	CE	Medium	Japan	Central Japan, Eastern part of the Ashio Mountains	139.4°E, 36.6°N	Other mammals	Waterways	River side	Land	Radiotelemetry GPS coordinates	No	No
ACTU_WOS_F_523	WOS	Todd, V. L. G., & Waters, D. A. (2017). Small scale habitat preferences of Myotis daubentonii, Pipistrellus pipistrellus, and potential aerial prey in an upland river valley. Acta Chiropterologica, 19(2), 255–272.	10.3161/15081109acc2017.19.2.004	Article	English	Q5	CE	Medium	United Kingdom	North Yorkshire	NA	Bats	Waterways	Riverbank	Levels of altitude: 150 m, 165 m, 210 m, 270 m	Number of bat passes	Yes	No
WOS_31046	WOS	Trewhella, W. J., & Harris, S. (1990). The effect of railway lines on urban fox (Vulpes vulpes) numbers and dispersal movements. Journal of Zoology, 221(2), 321–326.	10.1111/j.1469-7998.1990.tb04004.x	Article	English	Q4	CE	Medium	United Kingdom	England, Bristol and other cities : Bath, Birmingham, Bournemouth/Poole, Cheltenham, Gloucester, Leicester, London, Nottingham	NA	Other mammals	Railways	500-m square grid cells with railway lines	500-m square grid cells without railway lines	Dispersal movement (CMR)	Yes	No
WOS_31136	WOS	Tryjanowski, P., Sparks, T. H., Jerzak, L., Rosin, Z. M., & Skórka, P. (2014). A Paradox for Conservation: Electricity Pylons May Benefit Avian Diversity in Intensive Farmland. Conservation Letters, 7(1), 34–40.	10.1111/conl.12022	Article	English	Q2	CE	Low	Poland	Wielkopolska province	52°N16°E	Birds	Powerlines	Open field under the powerline	Open field 200 m perpendicular to the powerline	Abundance, species richness	Yes	Yes
WOS_31720	WOS	Vandevelde, J.-C., Bouhours, A., Julien, J.-F., Couvet, D., & Kerbiriou, C. (2014). Activity of European common bats along railway verges. Ecological Engineering, 64, 49–56.	10.1016/j.ecoleng.2013.12.025	Article	English	Q2	CE	Medium	France	East and south-east of the Paris Ile-de-France region	NA	Bats	Railways	Railway tracks-woodland edge	Field-woodland edge	(Passage frequency) time expansion outputs, high frequency outputs	Yes	Yes
WOS_31794	WOS	Vaughan, I. P., Noble, D. G., & Ormerod, S. J. (2007). Combining surveys of river habitats and river birds to appraise riverine hydromorphology. Freshwater Biology, 52, 2270–2284.	10.1111/j.1365-2427.2007.01837.x	Article	English	Q1	CI	Medium	United Kingdom	Great Britain	NA	Birds	Waterways	Riverbanks	- c. 10% of the banks reinforced - No reinforcement	Species occurrence	Yes	No
WOS_32002	WOS	Vignieri, S. N. (2005). Streams over mountains: influence of riparian connectivity on gene flow in the Pacific jumping mouse (Zapus trinotatus). Molecular Ecology, 14, 1925–1937.	10.1111/j.1365-294X.2005.02568.x	Article	English	Q4	CE	Medium	United States of America	Olympic peninsula, Washington State	NA	Small mammals	Waterways	Distance travelled along river only	Genetic distance	Genetic distances	Yes	No
WOS_32017	WOS	Vilches, A., Miranda, R., Arizaga, J., & Galicia, D. (2012). Habitat selection by breeding Common Kingfishers (Alcedo atthis L.) in rivers from Northern Iberia. Annales De Limnologie-International Journal of Limnology, 48, 289–294.	10.1051/limn/2012020	Article	English	Q1	CI	Medium	Spain	Navarra, Ebro basin	NA	Birds	Waterways	Riverbanks	Varying proportions of artificial walls on banks	Species occurrence	Yes	No
WOS_32067	WOS	Virgos, E. (2001). Relative value of riparian woodlands in landscapes with different forest cover for medium-sized Iberian carnivores. Biodiversity and Conservation, 10, 1039–1049.	10.1023/a:1016684428664	Article	English	Q5	CE	Low	Spain	NA	NA	Other mammals	Waterways	River banks	Types of landscape: according to the proportion of woodland (or high scrub) cover in a 20 X 20 km square enclosing each riparian area (areas with >60% woodland/scrub cover; areas with 20-35% cover; areas with <15% cover and covered by cereal fields or other crops)	Species richness, frequency of occurrence	No	No
WOS_32739	WOS	Waters, D., Jones, G., & Furlong, M. (1999). Foraging ecology of Leisler’s bat (Nyctalus leisleri) at two sites in southern Britain. Journal of Zoology, 249, 173–180.	10.1111/j.1469-7998.1999.tb00755.x	Article	English	Q2	CE	Medium	United Kingdom	Southern Britain, North Kent	51°24'N, 0°25'E	Bats	Roads	Lit roadsides lined by tall mature scrub either in hedges or at woodland margins	Woodland	Radiotelemetry GPS coordinates	Yes	No
WOS_32782	WOS	Weakland, C. A., & Wood, P. B. (2005). Cerulean Warbler (Dendroica cerulea) microhabitat and landscape-level habitat characteristics in southern west Virginia. The Auk, 122(2), 497–508.	10.1093/auk/122.2.497	Article	English	Q2	CE	Medium	United States of America	West Virginia, Boone, Logan, Kanawha, and Fayette counties	NA	Birds	Roads	Forest, open canopy road edge	Forest, natural canopy gap	Abundance (number of territories)	Yes	No
WOS_32805	WOS	Webb, W. C., Marzluff, J. M., & Hepinstall-Cymerman, J. (2011). Linking resource use with demography in a synanthropic population of common ravens. Biological Conservation, 144, 2264–2273.	10.1016/j.biocon.2011.06.001	Article	English	Q2	CE	Low	United States of America	Washington state, North and western portion of the Olympic Peninsula	NA	Birds	Roads	Forest, digitized surfaced roads 25 m resolution	Forest, digitized logging roads 25 m resolution	Radiotelemetry GPS coordinates	Yes	No
WOS_32883	WOS	Weiermans, J., & van Aarde, R. J. (2003). Roads as ecological edges for rehabilitating coastal dune assemblages in northern KwaZulu-Natal, South Africa. Restoration Ecology, 11(1), 43–49.	10.1046/j.1526-100X.2003.00026.x	Article	English	Q2	CE	Low	South Africa	coast of KwaZulu-Natal	28°43'S, 32°12'E	Birds, Small mammals	Roads	Forest road edge (undisturbed forest)	Forest interior (undisturbed forest)	Combinaison (Bray-Curtis distances) of species composition, species richness, species diversity, abundance	Yes	Yes
WOS_33301	WOS	Williams, J. R., Driscoll, D. A., & Bull, C. M. (2012). Roadside connectivity does not increase reptile abundance or richness in a fragmented mallee landscape. Austral Ecology, 37, 383–391.	10.1111/j.1442-9993.2011.02292.x	Article	English	Q2	CE	Low	Australia	South Australia, Eyre Peninsula, Hincks and Pinkawillinie regions	33°43'38''S, 135°59'39''E ; 33°0'28''S, 135°49'48''E	Reptiles	Roads	Roadside swale	Swale in conservation park	Abundance	No	Yes
GS_62	GREY_LITT_GoogleScholar	Williamson, P., & Evans, P. R. (1972). Lead: Levels in roadside invertebrates and small mammals. Bulletin of Environmental Contamination and Toxicology, 8(5), 280–288.	10.1007/BF01684557	Article	English	Q2	CE	Medium	United Kingdom	England,Catterick, Yorkshire and south road Durham	NA	Small mammals	Roads	Road verges	Field (200 ft or 1/2 mile from road)	NA	No	No
ACTU_WOS_T_9005	WOS	Wilson, A., Fenton, B., Malloch, G., Boag, B., Hubbard, S., & Begg, G. (2016). Urbanisation versus agriculture: a comparison of local genetic diversity and gene flow between wood mouse Apodemus sylvaticus populations in human-modified landscapes. Ecography, 39(1), 87–97.	10.1111/ecog.01297	Article	English	Q4	CE	Medium	United Kingdom	Scotland (Dundee)	NA	Small mammals	Roads and railways and waterways	Distance along roads, rivers, or railways	Genetic distance	Genetic distances	Yes	No
WOS_33751	WOS	Wuczynski, A., Kujawa, K., Dajdok, Z., & Grzesiak, W. (2011). Species richness and composition of bird communities in various field margins of Poland. Agriculture Ecosystems & Environment, 141, 202–209.	10.1016/j.agee.2011.02.031	Article	English	Q2	CE	Medium	Poland	SW Poland, Lower Silesia	NA	Birds	Roads	Field margins along roads	Field margins	Species richness, Abundance (number of breeding pairs)	No	No
ZR_18821	ZR	Yamac, E., & Kirazli, C. (2012). Road Effect on the Breeding Success and Nest Characteristics of the Eurasian Magpie (Pica pica). Ekoloji, 21(83), 1–10.	10.5053/ekoloji.2012.831	Article	English	Q2	CE	Medium	Turkey	Northwest Turkey, Eskisehir	39°47'N, 30°31'E	Birds	Roads	0 – 10 m from highway	0 – 10 m from dirt road	Ultimate breeding success (number of fledglings)	Yes	No
WOS_34486	WOS	Zabala, J., Zuberogoitia, I., & Martinez-Climent, J. A. (2006). Factors affecting occupancy by the European mink in south-western Europe. Mammalia, 193–201.	10.1515/mamm.2006.051	Article	English	Q1	CI	Medium	Spain	Basque Country	NA	Other mammals	Waterways	Riversides	- Agressively canalized riverbank (concrete canals) - Well-preserved riverbank	Species occurrence	Yes	No
