# Supplementary material for: Can linear transportation infrastructure verges constitute a habitat and/or a corridor for vertebrates in temperate ecosystems? A systematic review
Source: Springer Nature journal article supplement (doi:10.1186/s13750-020-00196-7), 2020-06-05
Supplement: MOESM9 [file 13750_2020_196_MOESM9_ESM.xlsx]

## Sheet: README
Additional file 9: Meta-analyses database. Table of all the variables extracted for computing effect sizes and analysing reasons for heterogeneity in effect sizes, and value and variance of the effect sizes computed.
Column descriptions
Study.ID	Study ID
Author_date	Name of the first author of the study and publication year
Date	Publication year
Case.ID	Case ID
Sub_study	Information on sub-study
Study_design	Study design (all studies were with a Control-Exposure ("CE") design)
Randomisation	Type of sampling: systematic or random sampling ("Yes"), directed sampling ("No")
Replicates	Sampling with true replication ("Yes") or with pseudoreplication ("Pseudoreplicates")
Bias	Risk of bias ("Low" or "Medium")
Litt	Study from grey littérature ("Grey_litt") or not ("Non_Grey_litt")
Study_duration	Duration of the study ("one_year" or "more_than_one_year")
Country	Country where the study was done
Continent	Continent where the study was done
LTI	Type of Linear Transportation Infrastructure studied
Biological_groups	Biological group studied
Species	Information on species studied
Info_taxon	Other information on the taxon studied
Taxon_type	Type of taxon studied ("individual_species" or "group")
Response_variable_raw	Response variable in raw form as indicated in the study
Response_variable	Response variable ("Abundance" or "Species_richness")
Treatment	What was considered the treatment
Control	What was considered the control
N_treatment	Sample size for treatment
Mean_treatment	Mean for treatment
Measure_var_treatment	Type of measure of variation for treatment
Var_treatment	Value of measure of variation for treatment
N_control	Sample size for control
Mean_control	Mean for control
Measure_var_control	Type of measure of variation for control
Var_control	Value of measure of variation for control
Test_type	Type of statistical test
Test_value	Value of statistics
Test_direction	Direction of the test
Test_pvalue	P-value of the test
boxplot_lower_whisker_treatment	Lower whisker of boxplot for treatment
boxplot_first_quartile_treatment	First quartile of boxplot for treatment
boxplot_median_treatment	Median of boxplot for treatment
boxplot_third_quartile_treatment	Third quartile of boxplot for treatment
boxplot_upper_whisker_treatment	Upper whisker of boxplot for treatment
boxplot_lower_whisker_control	Lower whisker of boxplot for control
boxplot_first_quartile_control	First quartile of boxplot for control
boxplot_median_control	Median of boxplot for control
boxplot_third_quartile_control	Third quartile of boxplot for control
boxplot_upper_whisker_control	Upper whisker of boxplot for control
Method	Method used to extract values
Type	Type of values available to compute effect sizes
Source	Source used to extract values
N_t	Sample size for treatment used to compute effect sizes
Mean_t	Mean for treatment used to compute effect sizes
SD_t	Standard deviation for treatment used to compute effect sizes
N_c	Sample size for control used to compute effect sizes
Mean_c	Mean for control used to compute effect sizes
SD_c	Standard deviation for control used to compute effect sizes
Hedges_d	Effect sizes value
Hedges_var1982	Effect sizes variance

## Sheet: File
Study.ID	Author_date	Date	Case.ID	Sub_study	Study_design	Randomisation	Replicates	Bias	Litt	Study_duration	Country	Continent	LTI	Biological_groups	Species	Info_taxon	Taxon_type	Response_variable_raw	Response_variable	Treatment	Control	N_treatment	Mean_treatment	Measure_var_treatment	Var_treatment	N_control	Mean_control	Measure_var_control	Var_control	Test_type	Test_value	Test_direction	Test_pvalue	boxplot_lower_whisker_treatment	boxplot_first_quartile_treatment	boxplot_median_treatment	boxplot_third_quartile_treatment	boxplot_upper_whisker_treatment	boxplot_lower_whisker_control	boxplot_first_quartile_control	boxplot_median_control	boxplot_third_quartile_control	boxplot_upper_whisker_control	Method	Type	Source	N_t	Mean_t	SD_t
BDD1_35993	Adams_1983	1983	Adams_1983_9	Southeast	CE	Yes	Yes	Low	Non_Grey_litt	more_than_one_year	USA	North_America	Highway	Small_mammals	NA	NA	Group	Number_of_captures_per_100_trapnights	Abundance	ROW	Adjacent_habitat	123	4.68	SE	0.42	123	3.48	SE	0.33	NA	NA	NA	NA	NA	NA	NA	NA	NA	NA	NA	NA	NA	NA	Table	N_mean_var	Table 3	123	4.68	4.65802533269196
BDD1_35993	Adams_1983	1983	Adams_1983_10	Southeast	CE	Yes	Yes	Low	Non_Grey_litt	more_than_one_year	USA	North_America	Non_Highway_road	Small_mammals	NA	NA	Group	Number_of_captures_per_100_trapnights	Abundance	ROW	Adjacent_habitat	118	1.62	SE	0.22	118	3.4	SE	0.52	NA	NA	NA	NA	NA	NA	NA	NA	NA	NA	NA	NA	NA	NA	Table	N_mean_var	Table 3	118	1.62	2.38981170806405
BDD1_35993	Adams_1983	1983	Adams_1983_15	Northwest_California	CE	Yes	Yes	Low	Non_Grey_litt	more_than_one_year	USA	North_America	Highway	Small_mammals	NA	NA	Group	Number_of_captures_per_100_trapnights	Abundance	ROW	Adjacent_habitat	24	29.75	SE	3.26	24	13.54	SE	3.26	NA	NA	NA	NA	NA	NA	NA	NA	NA	NA	NA	NA	NA	NA	Table	N_mean_var	Table 3	24	29.75	15.9706731229463
BDD1_35993	Adams_1983	1983	Adams_1983_16	Northwest_California	CE	Yes	Yes	Low	Non_Grey_litt	more_than_one_year	USA	North_America	Non_Highway_road	Small_mammals	NA	NA	Group	Number_of_captures_per_100_trapnights	Abundance	ROW	Adjacent_habitat	24	9.15	SE	2.89	24	13.37	SE	1.06	NA	NA	NA	NA	NA	NA	NA	NA	NA	NA	NA	NA	NA	NA	Table	N_mean_var	Table 3	24	9.15	14.1580507132868
BDD1_35993	Adams_1983	1983	Adams_1983_25	Northwest_Oregon	CE	Yes	Yes	Low	Non_Grey_litt	more_than_one_year	USA	North_America	Highway	Small_mammals	NA	NA	Group	Number_of_captures_per_100_trapnights	Abundance	ROW	Adjacent_habitat	98	7.31	SE	0.73	98	4.16	SE	0.55	NA	NA	NA	NA	NA	NA	NA	NA	NA	NA	NA	NA	NA	NA	Table	N_mean_var	Table 3	98	7.31	7.22663130372652
BDD1_35993	Adams_1983	1983	Adams_1983_26	Northwest_Oregon	CE	Yes	Yes	Low	Non_Grey_litt	more_than_one_year	USA	North_America	Non_Highway_road	Small_mammals	NA	NA	Group	Number_of_captures_per_100_trapnights	Abundance	ROW	Adjacent_habitat	99	4.46	SE	0.44	98	2.98	SE	0.39	NA	NA	NA	NA	NA	NA	NA	NA	NA	NA	NA	NA	NA	NA	Table	N_mean_var	Table 3	99	4.46	4.37794472326913
BDD1_3453	Arnold_2003	2003	Arnold_2003_3	NA	CE	No	Pseudoreplicates	Medium	Non_Grey_litt	more_than_one_year	Australia	Oceania	Non_Highway_road	Birds	NA	NA	Group	Number_of_species	Species_richness	Road_verges	Wandoo_woodland	3	45	SE	1.2	3	43.3	SE	1.8	NA	NA	NA	NA	NA	NA	NA	NA	NA	NA	NA	NA	NA	NA	Table	N_mean_var	Table 2	3	45	2.07846096908265
BDD1_4187	Ascensao_2012	2012	Ascensao_2012_7	Open_landscape	CE	Yes	Yes	Low	Non_Grey_litt	one_year	Portugal	Europe	Highway	Small_mammals	NA	NA	Group	Abundance	Abundance	Highway_verge	Open_habitat	7	NA	NA	NA	11	NA	NA	NA	NA	NA	NA	NA	1.460446247	3.985801217	6.54158215	6.784989858	7.484787018	0	0.517241379	1.004056795	1.582150101	1.734279919	Graphic_and_text	N_boxplot	Fig 3	7	5.3853955375	2.07347306740741
BDD1_12187	Barros_2014	2014	Barros_2014_1	NA	CE	Yes	Pseudoreplicates	Medium	Non_Grey_litt	one_year	Brazil	South_America	Waterway	Bats	NA	NA	Group	Number_of_passes_per_3min	Abundance	Channel	Grassland	360	NA	NA	NA	600	NA	NA	NA	NA	NA	NA	NA	0	0	0.979310345	3.006896552	6.993103448	0	0	0	0	0	Graphic_and_calcul	N_boxplot	Fig 8	360	1.503448276	2.22733077925926
BDD1_17287	BenAmi_2013	2013	BenAmi_2013_1	site_1	CE	Yes	Pseudoreplicates	Medium	Non_Grey_litt	one_year	Australia	Oceania	Highway	Other_mammals	Swamp_wallaby	NA	Individual_species	Number_of_pellet_groups	Abundance	Roadside_10m	Forest_170m	3	NA	NA	NA	3	NA	NA	NA	NA	NA	NA	NA	1.01863354	1.51552795	2.01242236	2.50931677	3.00621118	1.01863354	2.01242236	3.00621118	4.02484472	5.01863354	Graphic_and_text	N_boxplot	Fig 6	3	2.01242236	0.736139866666666
BDD1_17287	BenAmi_2013	2013	BenAmi_2013_2	site_2	CE	Yes	Pseudoreplicates	Medium	Non_Grey_litt	one_year	Australia	Oceania	Highway	Other_mammals	Swamp_wallaby	NA	Individual_species	Number_of_pellet_groups	Abundance	Roadside_10m	Forest_170m	3	NA	NA	NA	3	NA	NA	NA	NA	NA	NA	NA	0	0.52173913	1.01863354	2.50931677	4	2.01242236	2.01242236	2.01242236	2.01242236	2.01242236	Graphic_and_text	N_boxplot	Fig 6	3	1.51552795	1.47227973333333
BDD1_17287	BenAmi_2013	2013	BenAmi_2013_3	site_3	CE	Yes	Pseudoreplicates	Medium	Non_Grey_litt	one_year	Australia	Oceania	Highway	Other_mammals	Swamp_wallaby	NA	Individual_species	Number_of_pellet_groups	Abundance	Roadside_10m	Forest_170m	3	NA	NA	NA	3	NA	NA	NA	NA	NA	NA	NA	1.043478261	3.031055901	5.01863354	7.00621118	9.01863354	2.037267081	2.50931677	3.00621118	5.01863354	7.00621118	Graphic_and_text	N_boxplot	Fig 6	3	5.0186335405	2.94455946592593
BDD1_17287	BenAmi_2013	2013	BenAmi_2013_4	site_4	CE	Yes	Pseudoreplicates	Medium	Non_Grey_litt	one_year	Australia	Oceania	Highway	Other_mammals	Swamp_wallaby	NA	Individual_species	Number_of_pellet_groups	Abundance	Roadside_10m	Forest_170m	3	NA	NA	NA	3	NA	NA	NA	NA	NA	NA	NA	0.02484472	0.02484472	0.02484472	0.546583851	1.043478261	0.02484472	1.01863354	2.037267081	2.037267081	2.037267081	Graphic_and_text	N_boxplot	Fig 6	3	0.2857142855	0.38647343037037
BDD1_17287	BenAmi_2013	2013	BenAmi_2013_5	site_5	CE	Yes	Pseudoreplicates	Medium	Non_Grey_litt	one_year	Australia	Oceania	Highway	Other_mammals	Swamp_wallaby	NA	Individual_species	Number_of_pellet_groups	Abundance	Roadside_10m	Forest_170m	3	NA	NA	NA	3	NA	NA	NA	NA	NA	NA	NA	0.025806452	1.006451613	2.012903226	2.529032258	3.019354839	1.032258065	2.012903226	3.019354839	3.509677419	4.025806452	Graphic_and_text	N_boxplot	Fig 6	3	1.7677419355	1.12783751481481
BDD1_17287	BenAmi_2013	2013	BenAmi_2013_6	site_6	CE	Yes	Pseudoreplicates	Medium	Non_Grey_litt	one_year	Australia	Oceania	Highway	Other_mammals	Swamp_wallaby	NA	Individual_species	Number_of_pellet_groups	Abundance	Roadside_10m	Forest_170m	3	NA	NA	NA	3	NA	NA	NA	NA	NA	NA	NA	0.025806452	0.516129032	1.032258065	1.032258065	1.032258065	1.006451613	1.006451613	2.012903226	3.019354839	3.019354839	Graphic_and_text	N_boxplot	Fig 6	3	0.7741935485	0.382317802222222
BDD1_22619	Bissonette_2009	2009	Bissonette_2009_1	Sampling_2005	CE	Yes	Yes	Medium	Non_Grey_litt	one_year	USA	North_America	Highway	Small_mammals	NA	NA	Group	Abundance_CMR_estimate	Abundance	Highway_verge	Shrubland	450	57.44680851	Mean+95%CI	80.97264438	450	7.112462006	Mean+95%CI	12.03647416	NA	NA	NA	NA	NA	NA	NA	NA	NA	NA	NA	NA	NA	NA	Graphic	N_mean_var	Fig 3	450	57.44680851	254.621603215695
BDD1_30013	Castillo_2003	2003	Castillo_2003_1	NA	CE	No	Yes	Medium	Non_Grey_litt	more_than_one_year	Argentina	South_America	Railway	Small_mammals	NA	Rodents	Group	Relative_density_indices	Abundance	Railway_banks	Vacant_lots	4	8.544117647	SD	3.235249554	4	4.727941176	SD	6.192154457	NA	NA	NA	NA	NA	NA	NA	NA	NA	NA	NA	NA	NA	NA	Calcul_from_raw_data	N_mean_var	Figure 3	4	8.544117647	3.235249554
ACTU_WOS_T_4780	DaSilva_2017	2017	DaSilva_2017_1	NA	CE	Yes	Yes	Low	Non_Grey_litt	one_year	Brazil	South_America	Non_Highway_road	Birds	NA	NA	Group	Number_of_individuals	Abundance	Roadside	Savannah	60	107.761194	Mean+SE	117.9104478	60	169.8507463	Mean+SE	189.2537313	NA	NA	NA	NA	NA	NA	NA	NA	NA	NA	NA	NA	NA	NA	Graphic_and_text	N_mean_var	Fig 2	60	107.761194	78.6157818876647
ACTU_WOS_T_4780	DaSilva_2017	2017	DaSilva_2017_2	NA	CE	Yes	Yes	Low	Non_Grey_litt	one_year	Brazil	South_America	Non_Highway_road	Birds	NA	NA	Group	Number_of_species	Species_richness	Roadside	Savannah	60	40.64150943	Mean+SE	42.12398922	60	47.40161725	Mean+SE	49.06199461	NA	NA	NA	NA	NA	NA	NA	NA	NA	NA	NA	NA	NA	NA	Graphic_and_text	N_mean_var	Fig 2	60	40.64150943	11.4832390755181
BDD1_32767	Delgado_2008	2008	Delgado_2008_1	NA	CE	No	Yes	Medium	Non_Grey_litt	one_year	Spain	Europe	Non_Highway_road	Birds	NA	NA	Group	Number_of_species	Species_richness	Road_edge	Forest_interior	29	2.24	SD	1.5	35	2.66	SD	1.33	NA	NA	NA	NA	NA	NA	NA	NA	NA	NA	NA	NA	NA	NA	Table	N_mean_var	Table 2	29	2.24	1.5
BDD1_34137	Ellis_2002	2002	Ellis_2002_5	NA	CE	No	Pseudoreplicates	Medium	Grey_litt	one_year	USA	North_America	Waterway	Bats	NA	NA	Group	Number_of_calls_per_sampling_period	Abundance	River	Creek	108	7	SE	2	108	1	SE	0.4	NA	NA	NA	NA	NA	NA	NA	NA	NA	NA	NA	NA	NA	NA	Table_and_text	N_mean_var	Table 1	108	7	20.7846096908265
BDD1_34444	Evans_1997	1997	Evans_1997_1	NA	CE	Yes	Yes	Low	Non_Grey_litt	one_year	USA	North_America	Powerline	Birds	NA	NA	Group	Number_of_individuals_per_point	Abundance	Forest_powerline_edge	Forest_brush_edge	18	15.28	SE	0.53	28	13.54	SE	0.49	NA	NA	NA	NA	NA	NA	NA	NA	NA	NA	NA	NA	NA	NA	Table	N_mean_var	Table 1	18	15.28	2.24859956417322
BDD1_604	Fuller_2001	2001	Fuller_2001_1	NA	CE	No	Yes	Medium	Non_Grey_litt	more_than_one_year	UK	Europe	Non_Highway_road	Birds	NA	NA	Group	Number_of_species	Species_richness	Roadside_hedgerow	Non_roadside_hedgerow	22	7.6	SD	4	33	14.1	SD	5	NA	NA	NA	NA	NA	NA	NA	NA	NA	NA	NA	NA	NA	NA	Text	N_mean_var	Text	22	7.6	4
BDD1_993	Gatesire_2014	2014	Gatesire_2014_1	NA	CE	Yes	Pseudoreplicates	Medium	Non_Grey_litt	one_year	Rwanda	Africa	Waterway	Birds	NA	NA	Group	Number_of_individuals_per_visit	Abundance	Riverside	Streamside	8	26.03141361	SD?	33.11518325	8	21.02094241	SD?	38.81675393	NA	NA	NA	NA	NA	NA	NA	NA	NA	NA	NA	NA	NA	NA	Graphic_and_text	N_mean_var	Figure 6	8	26.03141361	18.2212682954065
BDD1_993	Gatesire_2014	2014	Gatesire_2014_2	NA	CE	Yes	Pseudoreplicates	Medium	Non_Grey_litt	one_year	Rwanda	Africa	Waterway	Birds	NA	NA	Group	Number_of_species_per_visit	Species_richness	Riverside	Streamside	8	10.25682508	SD?	12.68351871	8	8.008088979	SD?	10.5156724	NA	NA	NA	NA	NA	NA	NA	NA	NA	NA	NA	NA	NA	NA	Graphic_and_text	N_mean_var	Figure 4	8	10.25682508	7.29219304561188
BDD1_1775	Goosem_1997	1997	Goosem_1997_13	Regrowth_corridor_site3	CE	Yes	Yes	Low	Non_Grey_litt	one_year	Australia	Oceania	Powerline	Small_mammals	Melomys_cervinipes	Rainforest_species	Individual_species	Number_of_individuals_known_to_be_alive	Abundance	ROW_10m_from_edge_rightside	Forest_110m_from_edge_rightside	6	1.242630385	Mean+SE	1.551020408	6	0.537738461	Mean+SE	0.97819385	NA	NA	NA	NA	NA	NA	NA	NA	NA	NA	NA	NA	NA	NA	Graphic	N_mean_var	Figure 3	6	1.242630385	0.755398198115169
BDD1_1775	Goosem_1997	1997	Goosem_1997_14	Regrowth_corridor_site3	CE	Yes	Yes	Low	Non_Grey_litt	one_year	Australia	Oceania	Powerline	Small_mammals	Rattus_leucopus_OR_Rattus_fuscipes	Rainforest_species	Group	Number_of_individuals_known_to_be_alive	Abundance	ROW_10m_from_edge_rightside	Forest_110m_from_edge_rightside	6	2.467120181	Mean+SE	2.612244898	6	2.394557823	Mean+SE	3.120181406	NA	NA	NA	NA	NA	NA	NA	NA	NA	NA	NA	NA	NA	NA	Graphic	N_mean_var	Figure 3	6	2.467120181	0.355481505715812
BDD1_1775	Goosem_1997	1997	Goosem_1997_15	Regrowth_corridor_site4	CE	Yes	Yes	Low	Non_Grey_litt	one_year	Australia	Oceania	Powerline	Small_mammals	Melomys_cervinipes	Rainforest_species	Individual_species	Number_of_individuals_known_to_be_alive	Abundance	ROW_30m_from_edge	Forest_110m_from_edge_rightside	6	1.713651498	Mean+SE	2.193118757	6	0.523862375	Mean+SE	0.843507214	NA	NA	NA	NA	NA	NA	NA	NA	NA	NA	NA	NA	NA	NA	Graphic	N_mean_var	Figure 3	6	1.713651498	1.17445013292087
BDD1_1775	Goosem_1997	1997	Goosem_1997_16	Regrowth_corridor_site4	CE	Yes	Yes	Low	Non_Grey_litt	one_year	Australia	Oceania	Powerline	Small_mammals	Rattus_leucopus_OR_Rattus_fuscipes	Rainforest_species	Group	Number_of_individuals_known_to_be_alive	Abundance	ROW_30m_from_edge	Forest_110m_from_edge_rightside	6	0.976692564	Mean+SE	1.23418424	6	1.900110988	Mean+SE	2.344062153	NA	NA	NA	NA	NA	NA	NA	NA	NA	NA	NA	NA	NA	NA	Graphic	N_mean_var	Figure 3	6	0.976692564	0.630723219214049
ACTU_WOS_T_1552	Jumeau_2017	2017	Jumeau_2017_2	NA	CE	No	Yes	Medium	Non_Grey_litt	one_year	France	Europe	Non_Highway_road	Small_mammals	Microtus_arvalis	NA	Individual_species	Relative_abundance	Abundance	Road_verge	Wheat_field	16	28.231771	SE	5.361144484	16	15.33746961	SE	4.896988094	NA	NA	NA	NA	NA	NA	NA	NA	NA	NA	NA	NA	NA	NA	Table	N_mean_var	Author	16	28.231771	21.444577936
ACTU_WOS_T_1552	Jumeau_2017	2017	Jumeau_2017_3	NA	CE	No	Yes	Medium	Non_Grey_litt	one_year	France	Europe	Non_Highway_road	Small_mammals	Apodemus_sylvaticus	NA	Individual_species	Relative_abundance	Abundance	Road_verge	Wheat_field	16	4.603315669	SE	1.532485479	16	3.807898597	SE	1.385909924	NA	NA	NA	NA	NA	NA	NA	NA	NA	NA	NA	NA	NA	NA	Table	N_mean_var	Author	16	4.603315669	6.129941916
ACTU_WOS_T_1552	Jumeau_2017	2017	Jumeau_2017_4	NA	CE	No	Yes	Medium	Non_Grey_litt	one_year	France	Europe	Non_Highway_road	Small_mammals	Sorex_araneus	NA	Individual_species	Relative_abundance	Abundance	Road_verge	Wheat_field	16	2.528174898	SE	0.579314783	16	0.249646024	SE	0.170887693	NA	NA	NA	NA	NA	NA	NA	NA	NA	NA	NA	NA	NA	NA	Table	N_mean_var	Author	16	2.528174898	2.317259132
BDD1_7727	Kroodsma_1987	1987	Kroodsma_1987_1	NA	CE	Yes	Yes	Low	Non_Grey_litt	more_than_one_year	USA	North_America	Powerline	Birds	NA	NA	Group	Number_of_pairs_per_40ha	Abundance	Corridor_interior	Forest_interior	4	235.5	SD	45.78573286	4	149	SD	13.78404875	NA	NA	NA	NA	NA	NA	NA	NA	NA	NA	NA	NA	NA	NA	Calcul_from_raw_data	N_mean_var	Table 1	4	235.5	45.78573286
BDD1_7727	Kroodsma_1987	1987	Kroodsma_1987_2	NA	CE	Yes	Yes	Low	Non_Grey_litt	more_than_one_year	USA	North_America	Powerline	Birds	NA	NA	Group	Number_of_species	Species_richness	Corridor_interior	Forest_interior	4	10.25	SD	1.258305739	4	23.75	SD	2.5	NA	NA	NA	NA	NA	NA	NA	NA	NA	NA	NA	NA	NA	NA	Calcul_from_raw_data	N_mean_var	Table 1	4	10.25	1.258305739
BDD1_8536	Law_2011	2011	Law_2011_1	NA	CE	No	Yes	Medium	Grey_litt	one_year	Australia	Oceania	Waterway	Bats	NA	NA	Group	Number_of_calls	Abundance	Forest_0m	Forest_200m	4	424.0088106	Mean+SE	533.4801762	4	90.19823789	Mean+SE	107.1585903	NA	NA	NA	NA	NA	NA	NA	NA	NA	NA	NA	NA	NA	NA	Graphic	N_mean_var	Figure 3c	4	424.0088106	218.9427312
BDD1_8981	Leon_2013	2013	Leon_2013_1	NA	CE	No	Yes	Medium	Non_Grey_litt	more_than_one_year	Argentina	South_America	Railway	Small_mammals	Mus_musculus	NA	Individual_species	Number_of_captures_per_number_trapnights	Abundance	Railway_embankments	Cropfield_and_pasture_borders	24	0	SE	0	84	0.0011	SE	0.0006	NA	NA	NA	NA	NA	NA	NA	NA	NA	NA	NA	NA	NA	NA	Table	N_mean_var	Table 1	24	0	0
BDD1_9868	Lloyd_2006	2006	Lloyd_2006_1	NA	CE	No	Yes	Medium	Non_Grey_litt	one_year	Australia	Oceania	Waterway	Bats	NA	NA	Group	Number_of_passes_per_hour	Abundance	5th_order_stream	1st_order_stream	5	2.917261056	Mean+SE	4.151212553	15	0.563480742	Mean+SE	0.763195435	NA	NA	NA	NA	NA	NA	NA	NA	NA	NA	NA	NA	NA	NA	Graphic_and_text	N_mean_var	Figure 2d	5	2.917261056	2.75919942822963
BDD1_9891	Lock_1998	1998	Lock_1998_1	HohWest_Shuwah_1990	CE	Yes	Yes	Low	Non_Grey_litt	one_year	USA	North_America	Waterway	Birds	NA	NA	Group	Number_of_individuals_per_station_per_day	Abundance	5th_6th_order_stream	2nd_3rd_order_stream	48	33	SD	8.2	48	30.2	SD	4.2	NA	NA	NA	NA	NA	NA	NA	NA	NA	NA	NA	NA	NA	NA	Graphic_and_text	N_mean_var	Table 3	48	33	8.2
BDD1_9891	Lock_1998	1998	Lock_1998_2	HohWest_Shuwah_1991	CE	Yes	Yes	Low	Non_Grey_litt	one_year	USA	North_America	Waterway	Birds	NA	NA	Group	Number_of_individuals_per_station_per_day	Abundance	5th_6th_order_stream	2nd_3rd_order_stream	48	35.8	SD	6.7	48	33.8	SD	7.9	NA	NA	NA	NA	NA	NA	NA	NA	NA	NA	NA	NA	NA	NA	Graphic_and_text	N_mean_var	Table 3	48	35.8	6.7
BDD1_9891	Lock_1998	1998	Lock_1998_3	HohEast_Elk_1990	CE	Yes	Yes	Low	Non_Grey_litt	one_year	USA	North_America	Waterway	Birds	NA	NA	Group	Number_of_individuals_per_station_per_day	Abundance	5th_6th_order_stream	2nd_3rd_order_stream	48	37.8	SD	3.3	42	27.2	SD	2.3	NA	NA	NA	NA	NA	NA	NA	NA	NA	NA	NA	NA	NA	NA	Graphic_and_text	N_mean_var	Table 3	48	37.8	3.3
BDD1_9891	Lock_1998	1998	Lock_1998_4	HohEast_Elk_1991	CE	Yes	Yes	Low	Non_Grey_litt	one_year	USA	North_America	Waterway	Birds	NA	NA	Group	Number_of_individuals_per_station_per_day	Abundance	5th_6th_order_stream	2nd_3rd_order_stream	48	46.8	SD	4.2	42	31.4	SD	5	NA	NA	NA	NA	NA	NA	NA	NA	NA	NA	NA	NA	NA	NA	Graphic_and_text	N_mean_var	Table 3	48	46.8	4.2
BDD1_9891	Lock_1998	1998	Lock_1998_5	Calawah_Bear_1990	CE	Yes	Yes	Low	Non_Grey_litt	one_year	USA	North_America	Waterway	Birds	NA	NA	Group	Number_of_individuals_per_station_per_day	Abundance	5th_6th_order_stream	2nd_3rd_order_stream	48	34	SD	4.2	48	34.7	SD	3.6	NA	NA	NA	NA	NA	NA	NA	NA	NA	NA	NA	NA	NA	NA	Graphic_and_text	N_mean_var	Table 3	48	34	4.2
BDD1_9891	Lock_1998	1998	Lock_1998_6	Calawah_Bear_1991	CE	Yes	Yes	Low	Non_Grey_litt	one_year	USA	North_America	Waterway	Birds	NA	NA	Group	Number_of_individuals_per_station_per_day	Abundance	5th_6th_order_stream	2nd_3rd_order_stream	48	36.8	SD	6.1	48	31.2	SD	4.4	NA	NA	NA	NA	NA	NA	NA	NA	NA	NA	NA	NA	NA	NA	Graphic_and_text	N_mean_var	Table 3	48	36.8	6.1
BDD1_9891	Lock_1998	1998	Lock_1998_19	HohWest_Shuwah_1990	CE	Yes	Yes	Low	Non_Grey_litt	one_year	USA	North_America	Waterway	Birds	NA	NA	Group	Number_of_species_per_station_per_day	Species_richness	5th_6th_order_stream	2nd_3rd_order_stream	48	9.2	SD	1.3	48	6.3	SD	2.9	NA	NA	NA	NA	NA	NA	NA	NA	NA	NA	NA	NA	NA	NA	Graphic_and_text	N_mean_var	Table 3	48	9.2	1.3
BDD1_9891	Lock_1998	1998	Lock_1998_20	HohWest_Shuwah_1991	CE	Yes	Yes	Low	Non_Grey_litt	one_year	USA	North_America	Waterway	Birds	NA	NA	Group	Number_of_species_per_station_per_day	Species_richness	5th_6th_order_stream	2nd_3rd_order_stream	48	12	SD	2.2	48	8.8	SD	2.9	NA	NA	NA	NA	NA	NA	NA	NA	NA	NA	NA	NA	NA	NA	Graphic_and_text	N_mean_var	Table 3	48	12	2.2
BDD1_9891	Lock_1998	1998	Lock_1998_21	HohEast_Elk_1990	CE	Yes	Yes	Low	Non_Grey_litt	one_year	USA	North_America	Waterway	Birds	NA	NA	Group	Number_of_species_per_station_per_day	Species_richness	5th_6th_order_stream	2nd_3rd_order_stream	48	11.5	SD	1.8	42	7.7	SD	0.8	NA	NA	NA	NA	NA	NA	NA	NA	NA	NA	NA	NA	NA	NA	Graphic_and_text	N_mean_var	Table 3	48	11.5	1.8
BDD1_9891	Lock_1998	1998	Lock_1998_22	HohEast_Elk_1991	CE	Yes	Yes	Low	Non_Grey_litt	one_year	USA	North_America	Waterway	Birds	NA	NA	Group	Number_of_species_per_station_per_day	Species_richness	5th_6th_order_stream	2nd_3rd_order_stream	48	14.7	SD	2.6	42	9.6	SD	1.5	NA	NA	NA	NA	NA	NA	NA	NA	NA	NA	NA	NA	NA	NA	Graphic_and_text	N_mean_var	Table 3	48	14.7	2.6
BDD1_9891	Lock_1998	1998	Lock_1998_23	Calawah_Bear_1990	CE	Yes	Yes	Low	Non_Grey_litt	one_year	USA	North_America	Waterway	Birds	NA	NA	Group	Number_of_species_per_station_per_day	Species_richness	5th_6th_order_stream	2nd_3rd_order_stream	48	12.5	SD	1.5	48	9.8	SD	1.2	NA	NA	NA	NA	NA	NA	NA	NA	NA	NA	NA	NA	NA	NA	Graphic_and_text	N_mean_var	Table 3	48	12.5	1.5
BDD1_9891	Lock_1998	1998	Lock_1998_24	Calawah_Bear_1991	CE	Yes	Yes	Low	Non_Grey_litt	one_year	USA	North_America	Waterway	Birds	NA	NA	Group	Number_of_species_per_station_per_day	Species_richness	5th_6th_order_stream	2nd_3rd_order_stream	48	12.2	SD	1.6	48	9.8	SD	1.2	NA	NA	NA	NA	NA	NA	NA	NA	NA	NA	NA	NA	NA	NA	Graphic_and_text	N_mean_var	Table 3	48	12.2	1.6
BDD1_211	Mallard_2014	2014	Mallard_2014_1	Ecouves	CE	No	Pseudoreplicates	Medium	Grey_litt	one_year	France	Europe	Non_Highway_road	Bats	NA	NA	Group	Number_of_calls	Abundance	Mobile	Foret	8	8.25	SE	1.896896	8	23	SE	8.0089236	NA	NA	NA	NA	NA	NA	NA	NA	NA	NA	NA	NA	NA	NA	Table	N_mean_var	Author	8	8.25	5.36523209922255
BDD1_211	Mallard_2014	2014	Mallard_2014_2	Ecouves	CE	No	Pseudoreplicates	Medium	Grey_litt	one_year	France	Europe	Non_Highway_road	Bats	NA	NA	Group	Number_of_species	Species_richness	Mobile	Foret	8	2.378338279	Mean+SE	2.840504451	8	2.253709199	Mean+SE	2.663946588	NA	NA	NA	NA	NA	NA	NA	NA	NA	NA	NA	NA	NA	NA	Graphic_and_text	N_mean_var	Figure 221b	8	2.378338279	1.30720333702491
BDD1_211	Mallard_2014	2014	Mallard_2014_3	Perseigne	CE	No	Pseudoreplicates	Medium	Grey_litt	one_year	France	Europe	Non_Highway_road	Bats	NA	NA	Group	Number_of_calls	Abundance	Mobile	Foret	6	77	SE	26.49779865	6	0.166666667	SE	0.166666667	NA	NA	NA	NA	NA	NA	NA	NA	NA	NA	NA	NA	NA	NA	Table	N_mean_var	Author	6	77	64.9060859995089
BDD1_211	Mallard_2014	2014	Mallard_2014_4	Perseigne	CE	No	Pseudoreplicates	Medium	Grey_litt	one_year	France	Europe	Non_Highway_road	Bats	NA	NA	Group	Number_of_species	Species_richness	Mobile	Foret	6	3	Mean+SE	3.513513514	6	0.168918919	Mean+SE	0.337837838	NA	NA	NA	NA	NA	NA	NA	NA	NA	NA	NA	NA	NA	NA	Graphic_and_text	N_mean_var	Figure 221a	6	3	1.25784608532355
BDD1_10844	Maltchik_2008	2008	Maltchik_2008_1	NA	CE	Yes	Pseudoreplicates	Medium	Non_Grey_litt	one_year	Brazil	South_America	Waterway	Amphibians	NA	NA	Group	Mean_richness	Species_richness	20m_from_river	120m_from_river	12	0.5575	SD	0.507970382	12	0.494916667	SD	0.477782274	NA	NA	NA	NA	NA	NA	NA	NA	NA	NA	NA	NA	NA	NA	Calcul_from_raw_data	N_mean_var	Table 3	12	0.5575	0.507970382
BDD1_12294	Meunier_1999mammals	1999	Meunier_1999mammals_1	Garrigue	CE	No	Yes	Medium	Non_Grey_litt	one_year	France	Europe	Highway	Small_mammals	Apodemus_sylvaticus	NA	Individual_species	Number_of_captures_per_60trapnights	Abundance	Roadside_unmown_strip	Landscape_matrix	30	1.925445705	Mean+SE	2.183144246	30	0.554294976	Mean+SE	0.724473258	NA	NA	NA	NA	NA	NA	NA	NA	NA	NA	NA	NA	NA	NA	Graphic_and_text	N_mean_var	Figure 1	30	1.925445705	1.4114730394187
BDD1_12294	Meunier_1999mammals	1999	Meunier_1999mammals_2	Plantation	CE	No	Yes	Medium	Non_Grey_litt	one_year	France	Europe	Highway	Small_mammals	Apodemus_sylvaticus	NA	Individual_species	Number_of_captures_per_60trapnights	Abundance	Roadside_unmown_strip	Landscape_matrix	30	0.748784441	Mean+SE	0.918962723	30	0.44732577	Mean+SE	0.578606159	NA	NA	NA	NA	NA	NA	NA	NA	NA	NA	NA	NA	NA	NA	Graphic_and_text	N_mean_var	Figure 1	30	0.748784441	0.932104838488754
BDD1_12294	Meunier_1999mammals	1999	Meunier_1999mammals_3	Farmland	CE	No	Yes	Medium	Non_Grey_litt	one_year	France	Europe	Highway	Small_mammals	Apodemus_sylvaticus	NA	Individual_species	Number_of_captures_per_60trapnights	Abundance	Roadside_unmown_strip	Landscape_matrix	30	1.259319287	Mean+SE	1.653160454	30	0.884927066	Mean+SE	1.147487844	NA	NA	NA	NA	NA	NA	NA	NA	NA	NA	NA	NA	NA	NA	Graphic_and_text	N_mean_var	Figure 1	30	1.259319287	2.15715691240059
BDD1_12294	Meunier_1999mammals	1999	Meunier_1999mammals_4	Garrigue	CE	No	Yes	Medium	Non_Grey_litt	one_year	France	Europe	Highway	Small_mammals	Crocidura_russula	NA	Individual_species	Number_of_captures_per_60trapnights	Abundance	Roadside_unmown_strip	Landscape_matrix	30	2.593220339	Mean+SE	3.071186441	30	2.023728814	Mean+SE	2.440677966	NA	NA	NA	NA	NA	NA	NA	NA	NA	NA	NA	NA	NA	NA	Graphic_and_text	N_mean_var	Figure 1	30	2.593220339	2.61792815788215
BDD1_12294	Meunier_1999mammals	1999	Meunier_1999mammals_5	Plantation	CE	No	Yes	Medium	Non_Grey_litt	one_year	France	Europe	Highway	Small_mammals	Crocidura_russula	NA	Individual_species	Number_of_captures_per_60trapnights	Abundance	Roadside_unmown_strip	Landscape_matrix	30	1.586440678	Mean+SE	1.901694915	30	0.101694915	Mean+SE	0.183050847	NA	NA	NA	NA	NA	NA	NA	NA	NA	NA	NA	NA	NA	NA	Graphic_and_text	N_mean_var	Figure 1	30	1.586440678	1.7267185695398
BDD1_12294	Meunier_1999mammals	1999	Meunier_1999mammals_6	Farmland	CE	No	Yes	Medium	Non_Grey_litt	one_year	France	Europe	Highway	Small_mammals	Crocidura_russula	NA	Individual_species	Number_of_captures_per_60trapnights	Abundance	Roadside_unmown_strip	Landscape_matrix	30	4.149152542	Mean+SE	4.922033898	30	1.555932203	Mean+SE	2.003389831	NA	NA	NA	NA	NA	NA	NA	NA	NA	NA	NA	NA	NA	NA	Graphic_and_text	N_mean_var	Figure 1	30	4.149152542	4.2332455295638
BDD1_12294	Meunier_1999mammals	1999	Meunier_1999mammals_7	Farmland	CE	No	Yes	Medium	Non_Grey_litt	one_year	France	Europe	Highway	Small_mammals	Microtus_arvalis	NA	Individual_species	Number_of_captures_per_60trapnights	Abundance	Roadside_unmown_strip	Landscape_matrix	30	4.755480607	Mean+SE	5.68296796	30	3.136593592	Mean+SE	3.760539629	NA	NA	NA	NA	NA	NA	NA	NA	NA	NA	NA	NA	NA	NA	Graphic_and_text	N_mean_var	Figure 1	30	4.755480607	5.08005745038857
BDD1_12295	Meunier_1999birds	1999	Meunier_1999birds_1	Farmland_transect_1	CE	No	Yes	Medium	Non_Grey_litt	more_than_one_year	France	Europe	Highway	Birds	NA	NA	Group	Number_of_individuals	Abundance	Roadside	Landscape_matrix	8	1.9	SE	0.5	8	4.9	SE	1	NA	NA	NA	NA	NA	NA	NA	NA	NA	NA	NA	NA	NA	NA	Table	N_mean_var	Table 3	8	1.9	1.4142135623731
BDD1_12295	Meunier_1999birds	1999	Meunier_1999birds_2	Farmland_transect_2	CE	No	Yes	Medium	Non_Grey_litt	more_than_one_year	France	Europe	Highway	Birds	NA	NA	Group	Number_of_individuals	Abundance	Roadside	Landscape_matrix	8	6	SE	1.4	8	11.8	SE	2.6	NA	NA	NA	NA	NA	NA	NA	NA	NA	NA	NA	NA	NA	NA	Table	N_mean_var	Table 3	8	6	3.95979797464467
BDD1_12295	Meunier_1999birds	1999	Meunier_1999birds_3	Farmland_transect_3	CE	No	Yes	Medium	Non_Grey_litt	more_than_one_year	France	Europe	Highway	Birds	NA	NA	Group	Number_of_individuals	Abundance	Roadside	Landscape_matrix	8	13.8	SE	2.9	8	20.9	SE	7	NA	NA	NA	NA	NA	NA	NA	NA	NA	NA	NA	NA	NA	NA	Table	N_mean_var	Table 3	8	13.8	8.20243866176395
BDD1_12295	Meunier_1999birds	1999	Meunier_1999birds_4	Farmland_transect_4	CE	No	Yes	Medium	Non_Grey_litt	more_than_one_year	France	Europe	Highway	Birds	NA	NA	Group	Number_of_individuals	Abundance	Roadside	Landscape_matrix	8	11	SE	2.5	8	16	SE	6	NA	NA	NA	NA	NA	NA	NA	NA	NA	NA	NA	NA	NA	NA	Table	N_mean_var	Table 3	8	11	7.07106781186548
BDD1_12295	Meunier_1999birds	1999	Meunier_1999birds_5	Farmland_transect_5	CE	No	Yes	Medium	Non_Grey_litt	more_than_one_year	France	Europe	Highway	Birds	NA	NA	Group	Number_of_individuals	Abundance	Roadside	Landscape_matrix	8	22.5	SE	4.4	8	26.3	SE	8.3	NA	NA	NA	NA	NA	NA	NA	NA	NA	NA	NA	NA	NA	NA	Table	N_mean_var	Table 3	8	22.5	12.4450793488832
BDD1_12295	Meunier_1999birds	1999	Meunier_1999birds_6	Farmland_transect_6	CE	No	Yes	Medium	Non_Grey_litt	more_than_one_year	France	Europe	Highway	Birds	NA	NA	Group	Number_of_individuals	Abundance	Roadside	Landscape_matrix	8	22.8	SE	5.1	8	11.9	SE	4.1	NA	NA	NA	NA	NA	NA	NA	NA	NA	NA	NA	NA	NA	NA	Table	N_mean_var	Table 3	8	22.8	14.4249783362056
BDD1_12295	Meunier_1999birds	1999	Meunier_1999birds_7	Plantation_transect_1	CE	No	Yes	Medium	Non_Grey_litt	more_than_one_year	France	Europe	Highway	Birds	NA	NA	Group	Number_of_individuals	Abundance	Roadside	Landscape_matrix	8	3.4	SE	0.4	8	18.1	SE	2.9	NA	NA	NA	NA	NA	NA	NA	NA	NA	NA	NA	NA	NA	NA	Table	N_mean_var	Table 3	8	3.4	1.13137084989848
BDD1_12295	Meunier_1999birds	1999	Meunier_1999birds_8	Plantation_transect_2	CE	No	Yes	Medium	Non_Grey_litt	more_than_one_year	France	Europe	Highway	Birds	NA	NA	Group	Number_of_individuals	Abundance	Roadside	Landscape_matrix	8	7.5	SE	1.1	8	11.9	SE	2.4	NA	NA	NA	NA	NA	NA	NA	NA	NA	NA	NA	NA	NA	NA	Table	N_mean_var	Table 3	8	7.5	3.11126983722081
BDD1_12295	Meunier_1999birds	1999	Meunier_1999birds_9	Plantation_transect_3	CE	No	Yes	Medium	Non_Grey_litt	more_than_one_year	France	Europe	Highway	Birds	NA	NA	Group	Number_of_individuals	Abundance	Roadside	Landscape_matrix	8	4.1	SE	1.1	8	11.6	SE	2.8	NA	NA	NA	NA	NA	NA	NA	NA	NA	NA	NA	NA	NA	NA	Table	N_mean_var	Table 3	8	4.1	3.11126983722081
BDD1_12295	Meunier_1999birds	1999	Meunier_1999birds_10	Plantation_transect_4	CE	No	Yes	Medium	Non_Grey_litt	more_than_one_year	France	Europe	Highway	Birds	NA	NA	Group	Number_of_individuals	Abundance	Roadside	Landscape_matrix	8	3.3	SE	1.1	8	7.1	SE	1.6	NA	NA	NA	NA	NA	NA	NA	NA	NA	NA	NA	NA	NA	NA	Table	N_mean_var	Table 3	8	3.3	3.11126983722081
BDD1_12295	Meunier_1999birds	1999	Meunier_1999birds_11	Plantation_transect_5	CE	No	Yes	Medium	Non_Grey_litt	more_than_one_year	France	Europe	Highway	Birds	NA	NA	Group	Number_of_individuals	Abundance	Roadside	Landscape_matrix	8	1.9	SE	0.4	8	5.5	SE	1.1	NA	NA	NA	NA	NA	NA	NA	NA	NA	NA	NA	NA	NA	NA	Table	N_mean_var	Table 3	8	1.9	1.13137084989848
BDD1_12295	Meunier_1999birds	1999	Meunier_1999birds_12	Plantation_transect_6	CE	No	Yes	Medium	Non_Grey_litt	more_than_one_year	France	Europe	Highway	Birds	NA	NA	Group	Number_of_individuals	Abundance	Roadside	Landscape_matrix	8	1.9	SE	0.7	8	6.3	SE	1.4	NA	NA	NA	NA	NA	NA	NA	NA	NA	NA	NA	NA	NA	NA	Table	N_mean_var	Table 3	8	1.9	1.97989898732233
BDD1_12295	Meunier_1999birds	1999	Meunier_1999birds_13	Garrigue_transect_1	CE	No	Yes	Medium	Non_Grey_litt	more_than_one_year	France	Europe	Highway	Birds	NA	NA	Group	Number_of_individuals	Abundance	Roadside	Landscape_matrix	8	2.1	SE	0.7	8	12	SE	3.9	NA	NA	NA	NA	NA	NA	NA	NA	NA	NA	NA	NA	NA	NA	Table	N_mean_var	Table 3	8	2.1	1.97989898732233
BDD1_12295	Meunier_1999birds	1999	Meunier_1999birds_14	Garrigue_transect_2	CE	No	Yes	Medium	Non_Grey_litt	more_than_one_year	France	Europe	Highway	Birds	NA	NA	Group	Number_of_individuals	Abundance	Roadside	Landscape_matrix	8	0.6	SE	0.3	8	6.6	SE	1.1	NA	NA	NA	NA	NA	NA	NA	NA	NA	NA	NA	NA	NA	NA	Table	N_mean_var	Table 3	8	0.6	0.848528137423857
BDD1_12295	Meunier_1999birds	1999	Meunier_1999birds_15	Garrigue_transect_3	CE	No	Yes	Medium	Non_Grey_litt	more_than_one_year	France	Europe	Highway	Birds	NA	NA	Group	Number_of_individuals	Abundance	Roadside	Landscape_matrix	8	1.3	SE	0.4	8	17	SE	3	NA	NA	NA	NA	NA	NA	NA	NA	NA	NA	NA	NA	NA	NA	Table	N_mean_var	Table 3	8	1.3	1.13137084989848
BDD1_12295	Meunier_1999birds	1999	Meunier_1999birds_16	Garrigue_transect_4	CE	No	Yes	Medium	Non_Grey_litt	more_than_one_year	France	Europe	Highway	Birds	NA	NA	Group	Number_of_individuals	Abundance	Roadside	Landscape_matrix	8	2.3	SE	0.7	8	14.3	SE	2.3	NA	NA	NA	NA	NA	NA	NA	NA	NA	NA	NA	NA	NA	NA	Table	N_mean_var	Table 3	8	2.3	1.97989898732233
BDD1_12295	Meunier_1999birds	1999	Meunier_1999birds_17	Garrigue_transect_5	CE	No	Yes	Medium	Non_Grey_litt	more_than_one_year	France	Europe	Highway	Birds	NA	NA	Group	Number_of_individuals	Abundance	Roadside	Landscape_matrix	8	1.1	SE	0.4	8	8.4	SE	1.4	NA	NA	NA	NA	NA	NA	NA	NA	NA	NA	NA	NA	NA	NA	Table	N_mean_var	Table 3	8	1.1	1.13137084989848
BDD1_12295	Meunier_1999birds	1999	Meunier_1999birds_18	Garrigue_transect_6	CE	No	Yes	Medium	Non_Grey_litt	more_than_one_year	France	Europe	Highway	Birds	NA	NA	Group	Number_of_individuals	Abundance	Roadside	Landscape_matrix	8	2.1	SE	0.5	8	8.4	SE	1.3	NA	NA	NA	NA	NA	NA	NA	NA	NA	NA	NA	NA	NA	NA	Table	N_mean_var	Table 3	8	2.1	1.4142135623731
BDD1_12295	Meunier_1999birds	1999	Meunier_1999birds_19	Farmland_transect_1	CE	No	Yes	Medium	Non_Grey_litt	more_than_one_year	France	Europe	Highway	Birds	NA	NA	Group	Number_of_species	Species_richness	Roadside	Landscape_matrix	8	1.8	SE	0.5	8	2.6	SE	0.6	NA	NA	NA	NA	NA	NA	NA	NA	NA	NA	NA	NA	NA	NA	Table	N_mean_var	Table 3	8	1.8	1.4142135623731
BDD1_12295	Meunier_1999birds	1999	Meunier_1999birds_20	Farmland_transect_2	CE	No	Yes	Medium	Non_Grey_litt	more_than_one_year	France	Europe	Highway	Birds	NA	NA	Group	Number_of_species	Species_richness	Roadside	Landscape_matrix	8	3.9	SE	0.9	8	3.5	SE	0.5	NA	NA	NA	NA	NA	NA	NA	NA	NA	NA	NA	NA	NA	NA	Table	N_mean_var	Table 3	8	3.9	2.54558441227157
BDD1_12295	Meunier_1999birds	1999	Meunier_1999birds_21	Farmland_transect_3	CE	No	Yes	Medium	Non_Grey_litt	more_than_one_year	France	Europe	Highway	Birds	NA	NA	Group	Number_of_species	Species_richness	Roadside	Landscape_matrix	8	5.4	SE	0.9	8	4.4	SE	0.6	NA	NA	NA	NA	NA	NA	NA	NA	NA	NA	NA	NA	NA	NA	Table	N_mean_var	Table 3	8	5.4	2.54558441227157
BDD1_12295	Meunier_1999birds	1999	Meunier_1999birds_22	Farmland_transect_4	CE	No	Yes	Medium	Non_Grey_litt	more_than_one_year	France	Europe	Highway	Birds	NA	NA	Group	Number_of_species	Species_richness	Roadside	Landscape_matrix	8	6.4	SE	1	8	3.1	SE	0.5	NA	NA	NA	NA	NA	NA	NA	NA	NA	NA	NA	NA	NA	NA	Table	N_mean_var	Table 3	8	6.4	2.82842712474619
BDD1_12295	Meunier_1999birds	1999	Meunier_1999birds_23	Farmland_transect_5	CE	No	Yes	Medium	Non_Grey_litt	more_than_one_year	France	Europe	Highway	Birds	NA	NA	Group	Number_of_species	Species_richness	Roadside	Landscape_matrix	8	8.6	SE	0.7	8	7.6	SE	0.9	NA	NA	NA	NA	NA	NA	NA	NA	NA	NA	NA	NA	NA	NA	Table	N_mean_var	Table 3	8	8.6	1.97989898732233
BDD1_12295	Meunier_1999birds	1999	Meunier_1999birds_24	Farmland_transect_6	CE	No	Yes	Medium	Non_Grey_litt	more_than_one_year	France	Europe	Highway	Birds	NA	NA	Group	Number_of_species	Species_richness	Roadside	Landscape_matrix	8	9.1	SE	0.7	8	3.3	SE	0.8	NA	NA	NA	NA	NA	NA	NA	NA	NA	NA	NA	NA	NA	NA	Table	N_mean_var	Table 3	8	9.1	1.97989898732233
BDD1_12295	Meunier_1999birds	1999	Meunier_1999birds_25	Plantation_transect_1	CE	No	Yes	Medium	Non_Grey_litt	more_than_one_year	France	Europe	Highway	Birds	NA	NA	Group	Number_of_species	Species_richness	Roadside	Landscape_matrix	8	2.1	SE	0.3	8	8.8	SE	1.3	NA	NA	NA	NA	NA	NA	NA	NA	NA	NA	NA	NA	NA	NA	Table	N_mean_var	Table 3	8	2.1	0.848528137423857
BDD1_12295	Meunier_1999birds	1999	Meunier_1999birds_26	Plantation_transect_2	CE	No	Yes	Medium	Non_Grey_litt	more_than_one_year	France	Europe	Highway	Birds	NA	NA	Group	Number_of_species	Species_richness	Roadside	Landscape_matrix	8	4.8	SE	0.6	8	6.9	SE	1.1	NA	NA	NA	NA	NA	NA	NA	NA	NA	NA	NA	NA	NA	NA	Table	N_mean_var	Table 3	8	4.8	1.69705627484771
BDD1_12295	Meunier_1999birds	1999	Meunier_1999birds_27	Plantation_transect_3	CE	No	Yes	Medium	Non_Grey_litt	more_than_one_year	France	Europe	Highway	Birds	NA	NA	Group	Number_of_species	Species_richness	Roadside	Landscape_matrix	8	2.5	SE	0.5	8	5.5	SE	0.9	NA	NA	NA	NA	NA	NA	NA	NA	NA	NA	NA	NA	NA	NA	Table	N_mean_var	Table 3	8	2.5	1.4142135623731
BDD1_12295	Meunier_1999birds	1999	Meunier_1999birds_28	Plantation_transect_4	CE	No	Yes	Medium	Non_Grey_litt	more_than_one_year	France	Europe	Highway	Birds	NA	NA	Group	Number_of_species	Species_richness	Roadside	Landscape_matrix	8	1.9	SE	0.3	8	4.1	SE	0.7	NA	NA	NA	NA	NA	NA	NA	NA	NA	NA	NA	NA	NA	NA	Table	N_mean_var	Table 3	8	1.9	0.848528137423857
BDD1_12295	Meunier_1999birds	1999	Meunier_1999birds_29	Plantation_transect_5	CE	No	Yes	Medium	Non_Grey_litt	more_than_one_year	France	Europe	Highway	Birds	NA	NA	Group	Number_of_species	Species_richness	Roadside	Landscape_matrix	8	1.5	SE	0.2	8	3.9	SE	0.5	NA	NA	NA	NA	NA	NA	NA	NA	NA	NA	NA	NA	NA	NA	Table	N_mean_var	Table 3	8	1.5	0.565685424949238
BDD1_12295	Meunier_1999birds	1999	Meunier_1999birds_30	Plantation_transect_6	CE	No	Yes	Medium	Non_Grey_litt	more_than_one_year	France	Europe	Highway	Birds	NA	NA	Group	Number_of_species	Species_richness	Roadside	Landscape_matrix	8	1.5	SE	0.5	8	4	SE	0.7	NA	NA	NA	NA	NA	NA	NA	NA	NA	NA	NA	NA	NA	NA	Table	N_mean_var	Table 3	8	1.5	1.4142135623731
BDD1_12295	Meunier_1999birds	1999	Meunier_1999birds_31	Garrigue_transect_1	CE	No	Yes	Medium	Non_Grey_litt	more_than_one_year	France	Europe	Highway	Birds	NA	NA	Group	Number_of_species	Species_richness	Roadside	Landscape_matrix	8	1.3	SE	0.4	8	4.8	SE	0.8	NA	NA	NA	NA	NA	NA	NA	NA	NA	NA	NA	NA	NA	NA	Table	N_mean_var	Table 3	8	1.3	1.13137084989848
BDD1_12295	Meunier_1999birds	1999	Meunier_1999birds_32	Garrigue_transect_2	CE	No	Yes	Medium	Non_Grey_litt	more_than_one_year	France	Europe	Highway	Birds	NA	NA	Group	Number_of_species	Species_richness	Roadside	Landscape_matrix	8	0.5	SE	0.3	8	3.5	SE	0.4	NA	NA	NA	NA	NA	NA	NA	NA	NA	NA	NA	NA	NA	NA	Table	N_mean_var	Table 3	8	0.5	0.848528137423857
BDD1_12295	Meunier_1999birds	1999	Meunier_1999birds_33	Garrigue_transect_3	CE	No	Yes	Medium	Non_Grey_litt	more_than_one_year	France	Europe	Highway	Birds	NA	NA	Group	Number_of_species	Species_richness	Roadside	Landscape_matrix	8	0.9	SE	0.2	8	6.9	SE	0.8	NA	NA	NA	NA	NA	NA	NA	NA	NA	NA	NA	NA	NA	NA	Table	N_mean_var	Table 3	8	0.9	0.565685424949238
BDD1_12295	Meunier_1999birds	1999	Meunier_1999birds_34	Garrigue_transect_4	CE	No	Yes	Medium	Non_Grey_litt	more_than_one_year	France	Europe	Highway	Birds	NA	NA	Group	Number_of_species	Species_richness	Roadside	Landscape_matrix	8	1.3	SE	0.3	8	6.9	SE	0.9	NA	NA	NA	NA	NA	NA	NA	NA	NA	NA	NA	NA	NA	NA	Table	N_mean_var	Table 3	8	1.3	0.848528137423857
BDD1_12295	Meunier_1999birds	1999	Meunier_1999birds_35	Garrigue_transect_5	CE	No	Yes	Medium	Non_Grey_litt	more_than_one_year	France	Europe	Highway	Birds	NA	NA	Group	Number_of_species	Species_richness	Roadside	Landscape_matrix	8	1	SE	0.3	8	5.4	SE	0.7	NA	NA	NA	NA	NA	NA	NA	NA	NA	NA	NA	NA	NA	NA	Table	N_mean_var	Table 3	8	1	0.848528137423857
BDD1_12295	Meunier_1999birds	1999	Meunier_1999birds_36	Garrigue_transect_6	CE	No	Yes	Medium	Non_Grey_litt	more_than_one_year	France	Europe	Highway	Birds	NA	NA	Group	Number_of_species	Species_richness	Roadside	Landscape_matrix	8	1.5	SE	0.3	8	5.1	SE	0.7	NA	NA	NA	NA	NA	NA	NA	NA	NA	NA	NA	NA	NA	NA	Table	N_mean_var	Table 3	8	1.5	0.848528137423857
BDD1_13141	Morgan_2010	2010	Morgan_2010_1	NA	CE	No	Pseudoreplicates	Medium	Non_Grey_litt	more_than_one_year	USA	North_America	Highway	Birds	Aphelocoma_coerulescens	Male_breeder	Individual_species	Number_of_individuals	Abundance	Road_edge	Pasture_edge	6	7.833333333	SD	0.98319208	6	12.5	SD	3.209361307	NA	NA	NA	NA	NA	NA	NA	NA	NA	NA	NA	NA	NA	NA	Calcul_from_raw_data	N_mean_var	Table 1	6	7.833333333	0.98319208
ACTU_WOS_T_2043	Myczko_2017	2017	Myczko_2017_1	NA	CE	No	Yes	Medium	Non_Grey_litt	one_year	Poland	Europe	Non_Highway_road	Bats	Barbastella_barbastellus	NA	Individual_species	Number_of_passes_per_hour	Abundance	Asphalt_road	Forest_road	53	2.83	SE	0.91	53	6.57	SE	1.95	NA	NA	NA	NA	NA	NA	NA	NA	NA	NA	NA	NA	NA	NA	Table_and_text	N_mean_var	Table 1	53	2.83	6.62489999924527
ACTU_WOS_T_2043	Myczko_2017	2017	Myczko_2017_2	NA	CE	No	Yes	Medium	Non_Grey_litt	one_year	Poland	Europe	Non_Highway_road	Bats	Eptesicus_serotinus_OR_nilssoni_OR_Vespertilio_murinus	NA	Group	Number_of_passes_per_hour	Abundance	Asphalt_road	Forest_road	53	15.74	SE	4.45	53	7.92	SE	3.65	NA	NA	NA	NA	NA	NA	NA	NA	NA	NA	NA	NA	NA	NA	Table_and_text	N_mean_var	Table 1	53	15.74	32.3964890072983
ACTU_WOS_T_2043	Myczko_2017	2017	Myczko_2017_3	NA	CE	No	Yes	Medium	Non_Grey_litt	one_year	Poland	Europe	Non_Highway_road	Bats	Myotis_daubentonii_OR_nattereri_OR_myotis_O_brandtii_OR_mystacinus	NA	Group	Number_of_passes_per_hour	Abundance	Asphalt_road	Forest_road	53	3.28	SE	0.82	53	6.11	SE	1.7	NA	NA	NA	NA	NA	NA	NA	NA	NA	NA	NA	NA	NA	NA	Table_and_text	N_mean_var	Table 1	53	3.28	5.96969010921002
ACTU_WOS_T_2043	Myczko_2017	2017	Myczko_2017_4	NA	CE	No	Yes	Medium	Non_Grey_litt	one_year	Poland	Europe	Non_Highway_road	Bats	Nyctalus_noctula	NA	Individual_species	Number_of_passes_per_hour	Abundance	Asphalt_road	Forest_road	53	44.38	SE	9.89	53	1.36	SE	0.55	NA	NA	NA	NA	NA	NA	NA	NA	NA	NA	NA	NA	NA	NA	Table_and_text	N_mean_var	Table 1	53	44.38	72.0002868049843
ACTU_WOS_T_2043	Myczko_2017	2017	Myczko_2017_5	NA	CE	No	Yes	Medium	Non_Grey_litt	one_year	Poland	Europe	Non_Highway_road	Bats	Plecotus_auritus_OR_austriacus	NA	Group	Number_of_passes_per_hour	Abundance	Asphalt_road	Forest_road	53	1.4	SE	0.44	53	1.93	SE	0.51	NA	NA	NA	NA	NA	NA	NA	NA	NA	NA	NA	NA	NA	NA	Table_and_text	N_mean_var	Table 1	53	1.4	3.20324835128343
ACTU_WOS_T_2043	Myczko_2017	2017	Myczko_2017_6	NA	CE	No	Yes	Medium	Non_Grey_litt	one_year	Poland	Europe	Non_Highway_road	Bats	Pipistrellus_nathusii	NA	Individual_species	Number_of_passes_per_hour	Abundance	Asphalt_road	Forest_road	53	1.76	SE	0.63	53	0.41	SE	0.15	NA	NA	NA	NA	NA	NA	NA	NA	NA	NA	NA	NA	NA	NA	Table_and_text	N_mean_var	Table 1	53	1.76	4.58646923024673
ACTU_WOS_T_2043	Myczko_2017	2017	Myczko_2017_7	NA	CE	No	Yes	Medium	Non_Grey_litt	one_year	Poland	Europe	Non_Highway_road	Bats	Pipistrellus_pipistrellus	NA	Individual_species	Number_of_passes_per_hour	Abundance	Asphalt_road	Forest_road	53	3.74	SE	1.12	53	2.38	SE	1.03	NA	NA	NA	NA	NA	NA	NA	NA	NA	NA	NA	NA	NA	NA	Table_and_text	N_mean_var	Table 1	53	3.74	8.15372307599418
ACTU_WOS_T_2043	Myczko_2017	2017	Myczko_2017_8	NA	CE	No	Yes	Medium	Non_Grey_litt	one_year	Poland	Europe	Non_Highway_road	Bats	Pipistrellus_pygmaeus	NA	Individual_species	Number_of_passes_per_hour	Abundance	Asphalt_road	Forest_road	53	2	SE	0.63	53	0.4	SE	0.15	NA	NA	NA	NA	NA	NA	NA	NA	NA	NA	NA	NA	NA	NA	Table_and_text	N_mean_var	Table 1	53	2	4.58646923024673
ACTU_WOS_T_2043	Myczko_2017	2017	Myczko_2017_9	NA	CE	No	Yes	Medium	Non_Grey_litt	one_year	Poland	Europe	Non_Highway_road	Bats	NA	NA	Group	Number_of_taxons	Species_richness	Asphalt_road	Forest_road	53	2.46	SE	0.16	53	1.52	SE	0.19	NA	NA	NA	NA	NA	NA	NA	NA	NA	NA	NA	NA	NA	NA	Table_and_text	N_mean_var	Table 1	53	2.46	1.16481758228488
BDD1_14619	ODonnell_2006	2006	ODonnell_2006_1	Knobs_Flat	CE	Yes	Pseudoreplicates	Medium	Non_Grey_litt	one_year	New_Zealand	Oceania	Non_Highway_road	Bats	Mystacina_tuberculata	NA	Individual_species	Number_of_passes_per_hour	Abundance	Road_edge	Forest_edge	10	6.26118068	Mean+95%CI	11.27012522	10	0	Mean+95%CI	0.715563506	NA	NA	NA	NA	NA	NA	NA	NA	NA	NA	NA	NA	NA	NA	Figure_and_text	N_mean_var	Figure 3A	10	6.26118068	7.00202164568941
BDD1_14619	ODonnell_2006	2006	ODonnell_2006_2	Knobs_Flat	CE	Yes	Pseudoreplicates	Medium	Non_Grey_litt	one_year	New_Zealand	Oceania	Non_Highway_road	Bats	Chalinolobus_tuberculatus	NA	Individual_species	Number_of_passes_per_hour	Abundance	Road_edge	Forest_edge	10	29.36096718	Mean+95%CI	58.37651123	10	110.5354059	Mean+95%CI	190.328152	NA	NA	NA	NA	NA	NA	NA	NA	NA	NA	NA	NA	NA	NA	Figure_and_text	N_mean_var	Figure 3B	10	29.36096718	40.5609337210898
BDD1_14619	ODonnell_2006	2006	ODonnell_2006_3	Plato_Creek	CE	Yes	Pseudoreplicates	Medium	Non_Grey_litt	one_year	New_Zealand	Oceania	Non_Highway_road	Bats	Chalinolobus_tuberculatus	NA	Individual_species	Number_of_passes_per_hour	Abundance	Road_edge	Forest_edge	10	10.01727116	Mean+95%CI	18.3074266	10	54.23143351	Mean+95%CI	97.40932642	NA	NA	NA	NA	NA	NA	NA	NA	NA	NA	NA	NA	NA	NA	Figure_and_text	N_mean_var	Figure 3B	10	10.01727116	11.5888382020316
BDD1_51469	Petit_1996	1996	Petit_1996_1	1987	CE	No	Pseudoreplicates	Medium	Non_Grey_litt	one_year	USA	North_America	Waterway	Birds	Protonotaria_citrea	Nesting_pairs	Individual_species	Number_of_individuals	Abundance	Shoreline	105m_away_from_water	4	5	SE	0	4	1	SE	0.4	NA	NA	NA	NA	NA	NA	NA	NA	NA	NA	NA	NA	NA	NA	Table	N_mean_var	Table 7	4	5	0
BDD1_51469	Petit_1996	1996	Petit_1996_2	1988	CE	No	Pseudoreplicates	Medium	Non_Grey_litt	one_year	USA	North_America	Waterway	Birds	Protonotaria_citrea	Nesting_pairs	Individual_species	Number_of_individuals	Abundance	Shoreline	105m_away_from_water	7	5	SE	0.2	7	1.4	SE	0.4	NA	NA	NA	NA	NA	NA	NA	NA	NA	NA	NA	NA	NA	NA	Table	N_mean_var	Table 7	7	5	0.529150262212918
BDD1_51469	Petit_1996	1996	Petit_1996_3	1989	CE	No	Pseudoreplicates	Medium	Non_Grey_litt	one_year	USA	North_America	Waterway	Birds	Protonotaria_citrea	Nesting_pairs	Individual_species	Number_of_individuals	Abundance	Shoreline	105m_away_from_water	7	4.6	SE	0.2	7	1.3	SE	0.4	NA	NA	NA	NA	NA	NA	NA	NA	NA	NA	NA	NA	NA	NA	Table	N_mean_var	Table 7	7	4.6	0.529150262212918
ACTU_WOS_F_2865	Rachwald_2016	2016	Rachwald_2016_1	Torphantrik_Wood	CE	Yes	Pseudoreplicates	Medium	Non_Grey_litt	one_year	UK	Europe	Waterway	Bats	Pipistrellus_pipistrellus	NA	Individual_species	Log_number_of_passes	Abundance	River_forest_edge	Meadow_forest_edge	41	0.62212766	Mean+SE	0.780425532	41	0.368510638	Mean+SE	0.494468085	NA	NA	NA	NA	NA	NA	NA	NA	NA	NA	NA	NA	NA	NA	Figure_and_text	N_mean_var	Figure 1	41	3.11372915706374	4.17025389515987
ACTU_WOS_F_2865	Rachwald_2016	2016	Rachwald_2016_2	Torphantrik_Wood	CE	Yes	Pseudoreplicates	Medium	Non_Grey_litt	one_year	UK	Europe	Waterway	Bats	Pipistrellus_pygmaeus	NA	Individual_species	Log_number_of_passes	Abundance	River_forest_edge	Meadow_forest_edge	41	0.783829787	Mean+SE	0.92	41	0.320851064	Mean+SE	0.436595745	NA	NA	NA	NA	NA	NA	NA	NA	NA	NA	NA	NA	NA	NA	Figure_and_text	N_mean_var	Figure 1	41	3.20255038800231	3.41755740268762
BDD1_18001	Rich_1994	1994	Rich_1994_1	NA	CE	Yes	Yes	Low	Non_Grey_litt	one_year	USA	North_America	Non_Highway_road	Birds	NA	Forest_interior_neotropical_migrants	Group	Relative_abundance	Abundance	Road_edge	Unpaved_road_edge	18	8	SE	1	18	10.3	SE	0.7	NA	NA	NA	NA	NA	NA	NA	NA	NA	NA	NA	NA	NA	NA	Table	N_mean_var	Table 4	18	8	4.24264068711928
BDD1_18001	Rich_1994	1994	Rich_1994_2	NA	CE	Yes	Yes	Low	Non_Grey_litt	one_year	USA	North_America	Non_Highway_road	Birds	NA	Other_forest_nesters	Group	Relative_abundance	Abundance	Road_edge	Unpaved_road_edge	18	10.7	SE	1.2	18	10.2	SE	0.8	NA	NA	NA	NA	NA	NA	NA	NA	NA	NA	NA	NA	NA	NA	Table	N_mean_var	Table 4	18	10.7	5.09116882454314
BDD1_18001	Rich_1994	1994	Rich_1994_3	NA	CE	Yes	Yes	Low	Non_Grey_litt	one_year	USA	North_America	Non_Highway_road	Birds	NA	Avian_nest_predators	Group	Relative_abundance	Abundance	Road_edge	Unpaved_road_edge	18	1.1	SE	0.4	18	1.1	SE	0.2	NA	NA	NA	NA	NA	NA	NA	NA	NA	NA	NA	NA	NA	NA	Table	N_mean_var	Table 4	18	1.1	1.69705627484771
BDD1_18001	Rich_1994	1994	Rich_1994_4	NA	CE	Yes	Yes	Low	Non_Grey_litt	one_year	USA	North_America	Non_Highway_road	Birds	Molothrus_ater	Brood_parasite	Individual_species	Relative_abundance	Abundance	Road_edge	Unpaved_road_edge	18	2.1	SE	0.3	18	2	SE	0.4	NA	NA	NA	NA	NA	NA	NA	NA	NA	NA	NA	NA	NA	NA	Table	N_mean_var	Table 4	18	2.1	1.27279220613579
BDD1_18001	Rich_1994	1994	Rich_1994_5	NA	CE	Yes	Yes	Low	Non_Grey_litt	one_year	USA	North_America	Powerline	Birds	NA	Forest_interior_neotropical_migrants	Group	Relative_abundance	Abundance	Power_line_edge	Unpaved_road_edge	18	6.8	SE	0.8	18	10.3	SE	0.7	NA	NA	NA	NA	NA	NA	NA	NA	NA	NA	NA	NA	NA	NA	Table	N_mean_var	Table 4	18	6.8	3.39411254969543
BDD1_18001	Rich_1994	1994	Rich_1994_6	NA	CE	Yes	Yes	Low	Non_Grey_litt	one_year	USA	North_America	Powerline	Birds	NA	Other_forest_nesters	Group	Relative_abundance	Abundance	Power_line_edge	Unpaved_road_edge	18	9.9	SE	0.6	18	10.2	SE	0.8	NA	NA	NA	NA	NA	NA	NA	NA	NA	NA	NA	NA	NA	NA	Table	N_mean_var	Table 4	18	9.9	2.54558441227157
BDD1_18001	Rich_1994	1994	Rich_1994_7	NA	CE	Yes	Yes	Low	Non_Grey_litt	one_year	USA	North_America	Powerline	Birds	NA	Avian_nest_predators	Group	Relative_abundance	Abundance	Power_line_edge	Unpaved_road_edge	18	1.5	SE	0.2	18	1.1	SE	0.2	NA	NA	NA	NA	NA	NA	NA	NA	NA	NA	NA	NA	NA	NA	Table	N_mean_var	Table 4	18	1.5	0.848528137423857
BDD1_18001	Rich_1994	1994	Rich_1994_8	NA	CE	Yes	Yes	Low	Non_Grey_litt	one_year	USA	North_America	Powerline	Birds	Molothrus_ater	Brood_parasite	Individual_species	Relative_abundance	Abundance	Power_line_edge	Unpaved_road_edge	18	1.5	SE	0.3	18	2	SE	0.4	NA	NA	NA	NA	NA	NA	NA	NA	NA	NA	NA	NA	NA	NA	Table	N_mean_var	Table 4	18	1.5	1.27279220613579
BDD1_18790	Rotholz_2013	2013	Rotholz_2013_1	NA	CE	Yes	Yes	Low	Non_Grey_litt	one_year	Israel	Asia	Non_Highway_road	Small_mammals	NA	NA	Group	Number_of_species	Species_richness	Roadside	Shrubland	10	4.486345904	Mean+SE	4.811443433	12	4.408322497	Mean+SE	4.746423927	NA	NA	NA	NA	NA	NA	NA	NA	NA	NA	NA	NA	NA	NA	Figure_and_text	N_mean_var	Figure 1	10	4.486345904	1.02804865333264
BDD1_18790	Rotholz_2013	2013	Rotholz_2013_2	NA	CE	Yes	Yes	Low	Non_Grey_litt	one_year	Israel	Asia	Non_Highway_road	Small_mammals	NA	NA	Group	Abundance	Abundance	Roadside	Shrubland	10	NA	NA	NA	12	NA	NA	NA	t_test	3.58	t>control	0.002	NA	NA	NA	NA	NA	NA	NA	NA	NA	NA	Text	N_test_val_sens_p	Text	10	NA	NA
BDD1_24083	Tryjanowski_2014	2014	Tryjanowski_2014_1	NA	CE	Yes	Yes	Low	Non_Grey_litt	one_year	Poland	Europe	Powerline	Birds	NA	NA	Group	Number_of_individuals	Abundance	Open_field_under_powerline	Open_field	91	1.713405239	Mean+SE	1.889060092	91	1.143297381	Mean+SE	1.235747304	NA	NA	NA	NA	NA	NA	NA	NA	NA	NA	NA	NA	NA	NA	Figure	N_mean_var	Figure 1	91	1.713405239	1.67564050195831
BDD1_24083	Tryjanowski_2014	2014	Tryjanowski_2014_2	NA	CE	Yes	Yes	Low	Non_Grey_litt	one_year	Poland	Europe	Powerline	Birds	NA	NA	Group	Number_of_species	Species_richness	Open_field_under_powerline	Open_field	91	1.269645609	Mean+SE	1.365177196	91	1.035439137	Mean+SE	1.106317411	NA	NA	NA	NA	NA	NA	NA	NA	NA	NA	NA	NA	NA	NA	Figure	N_mean_var	Figure 1	91	1.269645609	0.911313258128737
BDD1_24732	Vandevelde_2014	2014	Vandevelde_2014_1	Reproduction_period	CE	No	Yes	Medium	Non_Grey_litt	one_year	France	Europe	Railway	Bats	Pipistrellus_pipistrellus	NA	Individual_species	Estimate_of_abundance	Abundance	Railway_edge	Field_edge	26	4.8	SE	0.49	27	5.87	SE	0.69	NA	NA	NA	NA	NA	NA	NA	NA	NA	NA	NA	NA	NA	NA	Table_and_text	N_mean_var	Table 2	26	4.8	2.49851956166046
BDD1_24732	Vandevelde_2014	2014	Vandevelde_2014_2	Reproduction_period	CE	No	Yes	Medium	Non_Grey_litt	one_year	France	Europe	Railway	Bats	Nyctalus_spp	NA	Group	Estimate_of_abundance	Abundance	Railway_edge	Field_edge	26	2.05	SE	0.86	27	2.91	SE	1.21	NA	NA	NA	NA	NA	NA	NA	NA	NA	NA	NA	NA	NA	NA	Table_and_text	N_mean_var	Table 2	26	2.05	4.38515678168979
BDD1_24732	Vandevelde_2014	2014	Vandevelde_2014_3	Reproduction_period	CE	No	Yes	Medium	Non_Grey_litt	one_year	France	Europe	Railway	Bats	Myotis_spp	NA	Group	Estimate_of_abundance	Abundance	Railway_edge	Field_edge	26	3.44	SE	0.43	27	4.67	SE	0.52	NA	NA	NA	NA	NA	NA	NA	NA	NA	NA	NA	NA	NA	NA	Table_and_text	N_mean_var	Table 2	26	3.44	2.1925783908449
BDD1_24732	Vandevelde_2014	2014	Vandevelde_2014_4	Post_reproductive_period	CE	No	Yes	Medium	Non_Grey_litt	one_year	France	Europe	Railway	Bats	Pipistrellus_pipistrellus	NA	Individual_species	Estimate_of_abundance	Abundance	Railway_edge	Field_edge	26	4.93	SE	0.49	27	5.11	SE	0.68	NA	NA	NA	NA	NA	NA	NA	NA	NA	NA	NA	NA	NA	NA	Table_and_text	N_mean_var	Table 2	26	4.93	2.49851956166046
BDD1_24732	Vandevelde_2014	2014	Vandevelde_2014_5	Post_reproductive_period	CE	No	Yes	Medium	Non_Grey_litt	one_year	France	Europe	Railway	Bats	Nyctalus_spp	NA	Group	Estimate_of_abundance	Abundance	Railway_edge	Field_edge	26	3.92	SE	0.5	27	4.76	SE	0.61	NA	NA	NA	NA	NA	NA	NA	NA	NA	NA	NA	NA	NA	NA	Table_and_text	N_mean_var	Table 2	26	3.92	2.54950975679639
BDD1_24732	Vandevelde_2014	2014	Vandevelde_2014_6	Post_reproductive_period	CE	No	Yes	Medium	Non_Grey_litt	one_year	France	Europe	Railway	Bats	Myotis_spp	NA	Group	Estimate_of_abundance	Abundance	Railway_edge	Field_edge	26	4	SE	0.49	27	3.85	SE	0.84	NA	NA	NA	NA	NA	NA	NA	NA	NA	NA	NA	NA	NA	NA	Table_and_text	N_mean_var	Table 2	26	4	2.49851956166046
BDD1_26023	Weiermans_2003	2003	Weiermans_2003_1	Unmined_forest	CE	Yes	Yes	Low	Non_Grey_litt	one_year	South_Africa	Africa	Non_Highway_road	Birds	NA	NA	Group	Number_of_individuals	Abundance	Edge	Core	5	2.8	SE	0.5	5	2.5	SE	1.3	NA	NA	NA	NA	NA	NA	NA	NA	NA	NA	NA	NA	NA	NA	Table	N_mean_var	Table 3	5	2.8	1.11803398874989
BDD1_26023	Weiermans_2003	2003	Weiermans_2003_2	Unmined_forest	CE	Yes	Yes	Low	Non_Grey_litt	one_year	South_Africa	Africa	Non_Highway_road	Birds	NA	NA	Group	Number_of_species	Species_richness	Edge	Core	5	7.7	SE	0.3	5	7.2	SE	1.1	NA	NA	NA	NA	NA	NA	NA	NA	NA	NA	NA	NA	NA	NA	Table	N_mean_var	Table 3	5	7.7	0.670820393249937
BDD1_26489	Williams_2012	2012	Williams_2012_1	NA	CE	Yes	Yes	Low	Non_Grey_litt	one_year	Australia	Oceania	Non_Highway_road	Reptiles	Menetia_greyii	NA	Individual_species	Abundance	Abundance	Roadside_swale	Conservation_park_swale	60	1.995893224	Mean+95%CI	3.04312115	60	0.332648871	Mean+95%CI	1.379876797	NA	NA	NA	NA	NA	NA	NA	NA	NA	NA	NA	NA	NA	NA	Figure_and_text	N_mean_var	Figure 4	60	1.995893224	4.05387874604318
[truncated: 5 more columns]
