# Supplementary material for: Can linear transportation infrastructure verges constitute a habitat and/or a corridor for vertebrates in temperate ecosystems? A systematic review
Source: Springer Nature journal article supplement (doi:10.1186/s13750-020-00196-7), 2020-06-05
Supplement: MOESM11 [file 13750_2020_196_MOESM11_ESM.xlsx]

## Sheet: README
Additional file 11: List of excluded without-abstract articles. List of the articles that were excluded because they did not have an abstract.
Column descriptions
ID_doc	Unique identifier of the publication
Source	Source of the publication (Web of Science Core Collection (WOS), Zoological Record (ZR), grey literature (GREY_LITT)
DOI	Digital Object Identifier of the publication
Publication_year	Year of the publication
Publication_author	Author(s) of the publication
Publication_title	Title of the publication
Publication_journal	Journal of the publication

## Sheet: File
ID_doc	Source	DOI	Publication_year	Publication_author	Publication_title	Publication_journal
ZR_10146	ZR	NA	1987	/	Management and preservation of endangered birds in riparian ecosystems. A symposium presented in conjunction with the Cooper Ornithological Society Annual Meeting, 10 September 1986.	NA
ZR_19004	ZR	NA	1989	/	Amphibians and roads. Proceedings of the Toad Tunnel Conference, Rendsburg, Federal Republic of Germany, 7-8 January 1989.	NA
ZR_10155	ZR	NA	1998	/	Behaviour and ecology of riparian mammals.	NA
ZR_19007	ZR	NA	1999	/	Powerlines modified to protect vultures.	NA
ZR_10164	ZR	NA	2003	/	Plants and vertebrates of the Caura's riparian corridor: their biology, use and conservation.	NA
ZR_10202	ZR	NA	1987	Abdunazarov, B. B.	[Evaluation of bird mortality from electric power lines of medium capacity (6-35 kW) in Uzbekistan.]	NA
ZR_22	ZR	NA	2010	Acharya, Paras Mani; Lamsal, Paras	A SURVEY FOR SMOOTH COATED OTTER LUTROGALE PERSPICILLATA ON THE RIVER NARAYANI, CHITWAN NATIONAL PARK, NEPAL.	NA
ZR_10218	ZR	NA	1981	Adams, L. W.	Effects of roads on small mammals.	NA
ZR_10228	ZR	NA	1995	Agetsuma, Naoki	Group composition and reproduction of provisioned Japanese monkeys along the Anbo road on Yakushima Island.	NA
ZR_10238	ZR	NA	1976	Ahmed, M. F.	An exercise for estimating wild ungulate population in Gir by road-strip census.	NA
ZR_82	ZR	NA	2001	Akatsuka, Takayuki	Nest site selection of the long-tailed tits by a river.	NA
ZR_10253	ZR	NA	1986	Albuquerque, J. L. B.; Witech, A. J.; Aldous, A. M.	A roadside court of diurnal raptors in Rio Grande do Sul, Brazil.	NA
ZR_117	ZR	NA	2014	Alexandar, R.; Jayakumar, J.	Reptiles of Ousteri Riparian Areas, Puducherry, India.	NA
ZR_10273	ZR	NA	1988	Allen, D.	Raptors nesting on transmission pylons.	NA
ZR_10285	ZR	NA	1997	Almingol Munoz, Carlos	Death toll of birds in a high traffic road that surrounds Pamplona (north Spain).	NA
ZR_10301	ZR	NA	1996	Alvarez, Jose Antonio; Pozo, Javier Esteban	[Modification of an overhead cable as threat to wintering crane population.]	NA
WOS_819	WOS	10.1111/j.1365-2028.1989.tb01022.x	1989	AMUBODE, FO; AKOSSIM, CA	KOB NUMBER AND HABITAT CHARACTERISTICS OF RIPARIAN VEGETATION IN NIGERIAN WOODED SAVANNA	African Journal of Ecology
WOS_858	WOS	NA	1985	ANDERSEN, DE; RONGSTAD, OJ; MYTTON, WR	LINE TRANSECT ANALYSIS OF RAPTOR ABUNDANCE ALONG ROADS	Wildlife Society Bulletin
ZR_217	ZR	NA	1994	Andersen, Mark C.; O'Farrell, Michael J.	Enhancing the suitability of habitats for the endangered Stephens' kangaroo rat: a long-term experimental study.	NA
ZR_220	ZR	NA	1989	Anderson, B. W.; Hunter, W. C.; Ohmart, R. D.	Status changes of bird species using revegetated riparian habitats on the lower Colorado River from 1977 to 1984.	NA
ZR_221	ZR	NA	1989	Anderson, B. W.; Laymon, S. A.	Creating habitat for the yellow-billed cuckoo (Coccyzus americana).	NA
ZR_226	ZR	NA	1980	Anderson, B. W.; Ohmart, R. D.	Designing and developing a predictive model and testing a revegetated riparian community for southwestern birds.	NA
ZR_227	ZR	NA	1985	Anderson, B. W.; Ohmart, R. D.	Avian use of revegetated riparian zones.	NA
ZR_222	ZR	NA	1985	Anderson, B. W.; Ohmart, R. D.; Allen, H. A.	Riparian birds in the riparian/agricultural interface.	NA
ZR_234	ZR	NA	1995	Anderson, E. N.	After the fire: bird use of a new burn.	NA
ZR_10333	ZR	NA	1979	Anderson, S. H.	Changes in forest bird species composition caused by transmission-line corridor cuts.	NA
ZR_10334	ZR	NA	1978	Andersson, A.	[Little ringed plover's egg moved because of road building.]	NA
ZR_255	ZR	NA	2001	Andrew, Nancy G.; Bleich, Vernon C.; Morrison, Amy D.; Lesicka, Leon M.; Cooley, Patrick J.	Wildlife mortalities associated with artificial water sources.	NA
ZR_258	ZR	10.1002/rrr.3450040212	1989	Andrews, E.	Assessment of the value of rivers for otters (Lutra lutra).	NA
ZR_10347	ZR	NA	1993	Andrews, E.; Howell, P.; Johnson, K.	Otter survey of Wales 1991.	NA
ZR_10350	ZR	NA	2008	Andrews, Kimberly M.; Gibbons, J. Whitfield	Roads as catalysts of urbanization: snakes on roads face differential impacts due to inter- and intraspecific ecological attributes.	NA
ZR_10360	ZR	10.1007/s00436-007-0526-7	2007	Anjos, L. A.; Almeida, W. O.; Vasconcellos, A.; Freire, E. M. X.; Rocha, C. F. D.	The alien and native pentastomids fauna of an exotic lizard population from Brazilian Northeast.	NA
ZR_274	ZR	NA	1982	Anonymous	[River bank erosion is a threat to bird conservation areas in Holland's Diep/Haringvliet area.]	NA
ZR_10367	ZR	NA	1983	Anonymous	[Kestrels along the verges of motorways.]	NA
ZR_10374	ZR	NA	1992	Anonymous	Hydrocarbon development in the Beaufort region and roadway development to the Yukon North Slope will alter the number of barren ground caribou and their distribution.	NA
ZR_10375	ZR	NA	1992	Anonymous	Oil and gas development, construction, and activities and the presence of an above-ground pipeline and gathering system will change the abundance and distribution of moose.	NA
ZR_278	ZR	NA	1997	Anonymous	[Birds of river banks in Madrid.]	NA
ZR_289	ZR	10.2307/3534114	1987	Anthony, R. G.; Forsman, E. D.; Green, G. A.; Witmer, G.; Nelson, S. K.	Small mammal populations in riparian zones of different aged coniferous forests.	NA
ZR_301	ZR	NA	1985	Apple, L. L.	Riparian habitat restoration and beavers.	NA
ZR_300	ZR	NA	1985	Apple, L. L.; Smith, B. H.; Dunder, J. D.; Baker, B. W.	The use of beavers for riparian/aquatic habitat restoration of cold desert, gully-cut stream systems in southwestern Wyoming.	NA
ZR_10408	ZR	NA	1999	Ariel Bencke, Glayson; Curra Bencke, Cinara S.	The potential importance of road deaths as a cause of mortality for large forest owls in southern Brazil.	NA
ZR_10410	ZR	NA	2011	Arioli, Battista; Caccin, Claudio; Colombo, Edoardo; Limido, Emilio; Vigano, Andrea	[Construction of an underpass for amphibians of Rile Tenore Olona park (Varese).]	NA
ZR_355	ZR	NA	1996	Arner, Dale H.	Managing beaver ponds and riparian areas for waterfowl.	NA
ZR_10421	ZR	NA	1987	Arnold, G. W.; Algar, D.; Hobbs, R. J.; Atkins, L.	A survey of vegetation and its relationship to vertebrate fauna present in winter on road verges in the Kellerberrin district, W.A. Report to Roadside Vegetation Conservation Committee.	NA
ZR_10422	ZR	NA	1991	Arnold, G. W.; Weeldenburg, J. R.; Steven, D. E.	Distribution and abundance of two species of kangaroo in remnants of native vegetation in the central wheatbelt of Western Australia and the role of native vegetation along road verges and fencelines as linkages.	NA
WOS_1260	WOS	10.1016/0006-3207(90)90098-A	1990	ARNOLD, GW; WEELDENBURG, JR	FACTORS DETERMINING THE NUMBER AND SPECIES OF BIRDS IN ROAD VERGES IN THE WHEAT-BELT OF WESTERN-AUSTRALIA	Biological Conservation
ZR_422	ZR	NA	1991	Aumann, T.	Notes on the birds of the upper and middle reaches of Kimberley rivers during the dry season.	NA
WOS_1460	WOS	10.2307/1366390	1970	AUSTIN, GT	BREEDING BIRDS OF DESERT RIPARIAN HABITAT IN SOUTHERN NEVADA	Condor
ZR_10470	ZR	NA	2007	Austin, Sean C.; Tewes, Michael E.; Grassman, Lon I.; Silvy, Nova J.	Road ecology of the leopard cat Prionailurus bengalensis in Khao Yai National Park, Thailand.	NA
ZR_10476	ZR	NA	1995	Aye, Pyone Pyone; Nakamura, Robert M.; Sawa, Thomas R.; Silva, Peter	Mortality of owls in Hawaii.	NA
ZR_442	ZR	NA	1989	Ayres, J. M.; Bonsiepe, J. I.; Townshend, T. J.	Notes on monkeys and habitat in the northeast of Marajo Island, Brazil.	NA
ZR_462	ZR	NA	1997	Baccus, John T.; Wallace, Michael W.	Distribution and habitat affinity of the swamp rabbit (Sylvilagus aquaticus: Lagomorpha: Leporidae) on the Edwards Plateau of Texas.	NA
ZR_10493	ZR	NA	2009	Bachhausen, Paul	[Record of an axanthic fire salamander (Salamandra salamandra terrestris) in North Rhine Westphalia.]	NA
ZR_10499	ZR	NA	2000	Bafaluy, J. J.	Ran over bats mortality in South Huesca roads.	NA
ZR_495	ZR	10.1046/j.1439-0310.2003.00866.x	2003	Baker, Myron C.; Logue, David M.	Population differentiation in a complex bird sound: a comparison of three bioacoustical analysis procedures.	NA
ZR_506	ZR	NA	2008	Bakka, S. V.	The eagle owl on the territory of Kamsko-Bakaldinskie Bogs in the N. Novgorod District, Russia.	NA
ZR_10531	ZR	NA	2011	Baladron, Alejandro V.; Bo, Maria S.; Malizia, Ana I.; Bechard, Marc J.	FOOD HABITS OF THE ROADSIDE HAWK (BUTEO MAGNIROSTRIS) DURING THE NONBREEDING SEASON IN THE SOUTHEASTERN PAMPAS OF ARGENTINA.	NA
ZR_511	ZR	NA	1994	Balciauskas, Linas; Ulevicius, Alius	Habitat quality. Lithuanian otter environment correlates.	NA
ZR_516	ZR	NA	1995	Baldi, Andras	Bird communities in the Szigetkoz after the diversion of the Danube.	NA
ZR_10554	ZR	NA	1989	Ballasina, D.	'Toads on roads' in Belgium.	NA
ZR_10558	ZR	NA	1980	Ballon, P.	Problemes poses par les grandes infrastructures lineaires vis-a-vis des populations de grands animaux.	NA
ZR_10559	ZR	NA	1995	Balmer, D. E.; Henderson, I. G.; Clark, N. A.	A study of the risk of collision with power lines by waterbirds in winter at Shotton Steel Works, North Wales.	NA
ZR_531	ZR	NA	1986	Baltosser, W. H.	Seasonal analysis of a southwestern New Mexico riparian bird community.	NA
ZR_10569	ZR	NA	1974	Banfield, A. W. F.	The relationship of caribou migration behaviour to pipeline construction.	NA
ZR_10581	ZR	NA	2000	Barbera, Juan Carlos; Ayllon, Enrique	[Canadian passes: death traps for amphibians.]	NA
ZR_10602	ZR	NA	1986	Barrass, A. N.	The effects of highway traffic noise on the phonotactic and associated reproductive behavior of selected anurans.	NA
ZR_10635	ZR	NA	1982	Bashore, T. L.	Roadside habitat and highway variables associated with vehicle-deer collisions.	NA
ZR_630	ZR	NA	2013	Bateman, Heather L.; Chung-MacCoubrey, Alice	ASPIDOSCELIS EXSANGUIS (Chihuahuan Spotted Whiptail), ASPIDOSCELIS NEOMEXICANA (New Mexico Whiptail), ASPIDOSCELIS UNIPARENS (Desert Grassland Whiptail). BIFURCATED TAILS.	NA
ZR_626	ZR	10.3368/er.26.3.193	2008	Bateman, Heather L.; Chung-MacCoubrey, Alice; Finch, Deborah M.; Snell, Howard L.; Hawksworth, David L.	Impacts of non-native plant removal on vertebrates along the Middle Rio Grande (New Mexico).	NA
ZR_10654	ZR	NA	2010	Battisti, Corrado; Zocchi, Alessandro	Birds on the roads: a preliminary note from central Italy.	NA
ZR_10659	ZR	NA	1997	Baudvin, Hugues	Barn owl (Tyto alba) and long-eared owl (Asio otus) mortality along motorways in Bourgogne-Champagne: report and suggestions.	NA
ZR_10660	ZR	NA	1982	Bauer, E. N.	Winter roadside raptor survey in El Paso County, Colorado, 1962-1979.	NA
ZR_10666	ZR	NA	1995	Baumgart, Bernd	[Influence of the Berlin-Hamburg motorway on the bird population of Tegeler forest.]	NA
ZR_10675	ZR	NA	2013	Baxter-Gilbert, James; Riley, Julia L.; Litzgus, Jacqueline D.	PLESTIODON FASCIATUS (Five-lined Skink). ARTIFICAL HABITAT USE.	NA
ZR_10692	ZR	NA	1983	Beaud, P.; Manuel, F.	Nidification reussie du chocard a bec jaune, Pyrrhocorax graculus, dans le depot des locomotives de Chateau-d'Oex (Prealpes vaudoises).	NA
ZR_688	ZR	NA	2013	Bedin, Luca; Turin, Paolo; Anostini, Luciano; Zago, Guido	Assessment of impacts and effectiveness of mitigative measures about erpetofauna [Herpetofauna] in an [a] yard area in the municipality of Rosolina (Rovigo - North East Italy).	NA
ZR_10740	ZR	NA	1980	Bell, H. L.	The effects of a power-line clearing on birds of dry sclerophyll forest at Black Mountain Reserve, Australian Capital Territory.	NA
ZR_709	ZR	NA	2000	Bellows, A. Scott; Mitchell, Joseph C.	Small mammal communities in riparian and upland habitats on the upper Coastal Plain of Virginia.	NA
ZR_712	ZR	NA	1985	Belluomini, L.; Trapp, G. R.	Ringtail distribution and abundance in the Central Valley of California.	NA
ZR_10761	ZR	NA	2000	Bender, Brigitte	[Protection successes on roads, including protection for salamanders by protection fences expertly erected by the city roads department.]	NA
ZR_719	ZR	NA	2008	Benecke, Hans-Guenter	[New bank profile of the Mittelland canals - a contribution to mammal protection.]	NA
ZR_10765	ZR	NA	1996	Benecke, Hans-Gunter; Sender, Wolfgang	[Pylons as nesting places of the white stork (Ciconia ciconia) in Dromling nature park (Saxony-Anhalt).]	NA
ZR_10772	ZR	NA	2005	Bengtsson, Kenneth	[Raven or buzzard - isn't it...]	NA
ZR_10774	ZR	NA	2009	Benitez-Lopez, A.	Are mammal and bird populations declining in the proximity of roads and other infrastructure?	NA
ZR_10780	ZR	NA	1988	Bennett, A. F.	Roadside vegetation: a habitat for mammals at Naringal, south-western Victoria.	NA
ZR_10786	ZR	NA	1986	Bennett, G.	Birding the Trans Canada Highway. Lap 27. Sault Ste. Marie, Ont. to Lake Superior Provincial Park.	NA
ZR_10787	ZR	NA	1986	Bennett, G.	Birding the Trans Canada Highway. Lap 29: Wawa to Obatanga.	NA
ZR_10801	ZR	NA	1981	Benson, P. C.	Large raptor electrocution and powerpole utilisation: a study in six western states.	NA
ZR_10806	ZR	NA	2009	Beraudo, Pier Luigi	Nesting of raven, Corvus corax, on a bridge in a lowland area.	NA
ZR_10810	ZR	NA	2005	Berezovikov, N. N.	[Autumn record of the water rail in the city of Alma-Ata.]	NA
ZR_10815	ZR	NA	1997	Berger, Heinz; Mehnert, Jan	Distribution and situation of the agile frog (Rana dalmatina) in Saxony.	NA
ZR_10831	ZR	NA	2000	Bernshausen, Frank; Kreuziger, Josef; Richarz, Klaus; Sawitzky, Heiko; Uther, Dirk	Bird protection along high-tension lines - interim report of a project on the minimization of the risk of electrocution.	NA
ZR_775	ZR	NA	2012	Bertassoni, Alessandra; Xavier Filho, Nilson Lino; Fonseca Moreira, Viviane; Feitosa, Ramao; Porfirio, Grasiela; Brandao, Andre W. A.; Campbell-Thompson, Edwin	A nest of Black-collared Hawk Busarellus nigricollis at Serra do Amolar, Pantanal, Brazil.	NA
ZR_791	ZR	NA	1979	Best, L. B.; Stauffer, D. F.; Geier, A. R.	Evaluating the effects of habitat alteration on birds and small mammals occupying riparian communities.	NA
WOS_2757	WOS	10.2307/1367468	1980	BEST, LB; STAUFFER, DF	FACTORS AFFECTING NESTING SUCCESS IN RIPARIAN BIRD COMMUNITIES	Condor
ZR_10846	ZR	NA	1979	Betsill, C. W.; Matthews, W. L.; Webb, L. G.	Cottontail rabbit habitat utilization of a seeded and mechanically maintained power line right-of-way.	NA
ZR_10855	ZR	NA	1994	Bevanger, Kjetil	Avian interactions with a 66 kV power line near Borrevann, Vestfold, Norway.	NA
ZR_10853	ZR	NA	1994	Bevanger, Kjetil; Bakke, Oyvind; Engen, Steinar	Corpse removal experiments with willow ptarmigan (Lagopus lagopus) in power-line corridors.	NA
ZR_10874	ZR	NA	2006	Bickmore, Catherine; Wyatt, Len	[Summary of studies on bats on a trunk road in Wales (Country Council of Wales, July 2003).]	NA
ZR_10908	ZR	NA	2001	Birko, Thomas	[Bird deaths on electricity cables, a continual problem.]	NA
ZR_833	ZR	NA	1982	Birks, J. D. S.; Linn, I. J.	Studies of home range of the feral mink, Mustela vison.	NA
ZR_10910	ZR	NA	2000	Bischoff, Tony; Lutter, Hans; Debus, Stephen	Square-tailed kites breeding on the mid-north coast of New South Wales.	NA
ZR_10913	ZR	NA	1973	Bishop, Y.; Bishop, R.	Predation of birds along railway lines.	NA
ZR_845	ZR	NA	2007	Bitz, Andreas	The birds of the "Unterfeld Guntersblum".	NA
ZR_10935	ZR	NA	2003	Blanco, Juan Carlos	Defragmentation of road infrastructures for large carnivores in Europe.	NA
ZR_10939	ZR	NA	1999	Blanke, Ina	Survey and habits of the sand lizard (Lacerta agilis) on railway embankments.	NA
ZR_10945	ZR	NA	1998	Blem, Charles R.; Willis, Beth A.	Seasonal variation of human-caused mortality of birds in the Richmond area.	NA
ZR_876	ZR	NA	2006	Blood, Doug; O'Connor, Denis	Land-roosting musk duck.	NA
ZR_10958	ZR	NA	1993	Boarman, William I.; Sazaki, Marc; Berry, Kristin H.; Goodlett, Gilbert O.; Jennings, W. Bryan; Woodman, A. Peter	Measuring the effectiveness of a tortoise-proof fence and culverts: status report from first field season.	NA
ZR_10959	ZR	NA	1997	Boarman, William I.; Sazaki, Marc; Jennings, W. Bryan	The effect of roads, barrier fences, and culverts on desert tortoise populations in California, USA.	NA
ZR_890	ZR	NA	1984	Bock, C. E.; Bock, J. H.	Importance of sycamores to riparian birds in southeastern Arizona.	NA
ZR_894	ZR	NA	2012	Bodrati, Alejandro; Cockle, Kristina L.; Salvador, Sergio A.; Klavins, Juan	Nesting of the olivaceous woodcreeper (Sittasomus griseicapillus).	NA
ZR_10970	ZR	NA	1989	Boer, A. H.	Taking the high road - operation dry moose is a success in New Brunswick.	NA
ZR_10985	ZR	NA	2009	Boesl, Matthias; Kutz, Werner	[The little owl on electric pylons.]	NA
ZR_10995	ZR	NA	1988	Bohm, R. T.	Three bald eagle nests on a Minnesota transmission line.	NA
ZR_10997	ZR	NA	1984	Boiten, M.	[The fauna and flora of road verges.]	NA
ZR_914	ZR	NA	2008	Bomberger Brown, Mary; Jorgensen, Joel G.; Rehme, Sarah E.	Endangered species responses to natural habitat declines: Nebraska's interior least terns (Sternula antillarum athalassos) and piping plovers (Charadrius melodus) nesting in a human-created habitat.	NA
ZR_11019	ZR	NA	1997	Bonin, Joel; DesGranges, Jean-Luc; Rodrigue, Jean; Ouellet, Martin	Anuran species richness in agricultural landscapes of Quebec: foreseeing long-term results of road call surveys.	NA
ZR_11027	ZR	NA	2011	Boonman, Martin; Smit, Gerard	[Marginal effects of motorways on bats.]	NA
ZR_11033	ZR	NA	1996	Borlenghi, Fabio	[Nesting of the black kite Milvus migrans inside the Rome ring road.]	NA
ZR_11039	ZR	NA	1984	Bosakowski, T.; Speiser, R.	Highway observations of great horned owls in New York State.	NA
ZR_11043	ZR	NA	1994	Bosakowski, Thomas; Speiser, Robert	Macrohabitat selection by nesting northern goshawks: implications for managing eastern forests.	NA
ZR_11048	ZR	NA	1993	Boshoff, A. F.	Density, breeding performance and stability of martial eagles Polemaetus bellicosus breeding on electricity pylons in the Nama-Karoo, South Africa.	NA
ZR_999	ZR	NA	2008	Bourget, Genevieve; Verreault, Guy	[The establishment of wooded river edges: a tool for reducing predation of the muskrat in the agricultural environment.]	NA
ZR_11062	ZR	NA	1983	Bourquin, J.-D.	Mortalite des rapaces le long de l'autoroute Geneve-Lausanne.	NA
WOS_3495	WOS	NA	1982	BOURQUIN, JD; MEYLAN, A.	SMALL MAMMALS COMMUNITIES ALONG DIVIDED HIGHWAYS - FAUNAS AND EXAMPLES	Revue Suisse De Zoologie
ZR_11071	ZR	NA	1998	Bowers, Dorothy G.; Andersen, David E.; Euliss, Ned H.	Anurans as indicators of wetland condition in the Prairie Pothole region of North Dakota: an Environmental Monitoring and Assessment Program pilot project.	NA
ZR_1015	ZR	NA	1996	Bowers, Rick; Bowers, Nora; Dunning, John B.	A closer look: buff breasted flycatcher.	NA
ZR_1017	ZR	NA	1991	Bowles, F. D.	A short note on the herpetofauna of Brittany's canal banks (or Verging on disaster, a cautionary note on French fauchage).	NA
ZR_11073	ZR	NA	1993	Bowles, Frank D.	A short note on the behaviour of Coronella austriaca on an atypical Dorset site.	NA
ZR_1022	ZR	NA	1981	Boyce, M. S.	Habitat ecology of an unexploited population of beavers in interior Alaska.	NA
ZR_11079	ZR	NA	2008	Boyles, Stephanie L.; Savitzky, Barbara A.	An analysis of the efficacy and comparative costs of using flow devices to resolve conflicts with North American beavers along roadways in the Coastal Plain of Virginia.	NA
ZR_1038	ZR	NA	1984	Brack, V.; Taylor, S.; Holmes, V. R.	Bat captures and niche partitioning along portions of three rivers in southern Michigan.	NA
ZR_1042	ZR	NA	1998	Bracko, Franc	Breeding of the common treecreeper Certhia familiaris in wooded floodplain of the Mura river.	NA
ZR_11120	ZR	NA	2003	Brauneis, Wolfram; Watzlaw, Wolfgang; Horn, Lothar	The behaviour of birds in an area of selected railway of 110 kV-line Bernburg - Susigke (Federal State of Sachsen-Anhalt). Flight reactions, wire approaches, breeding grounds.	NA
ZR_1089	ZR	NA	1989	Brauning, D. W.	Wetland songbirds.	NA
ZR_1096	ZR	NA	1984	Brayton, D. S.	The beaver and the stream.	NA
ZR_11131	ZR	NA	1989	Brehm, K.	The acceptance of 0.2-metre tunnels by amphibians during their migration to the breeding site.	NA
ZR_11132	ZR	NA	1992	Brehm, Kuno; Luneburg, Henning; Theede, Jurgen	The first toad tunnel and drift fence system without interference of geomagnetic orientation of amphibians.	NA
ZR_1120	ZR	NA	2001	Bretschko, Gernot; Waidbacher, H.	Riparian ecotones, invertebrates and fish: life cycle timing and trophic base.	NA
WOS_3752	WOS	10.2307/1564606	1991	BREWSTER, KN; BREWSTER, CM	MOVEMENT AND MICROHABITAT USE BY JUVENILE WOOD TURTLES INTRODUCED INTO A RIPARIAN HABITAT	Journal of Herpetology
ZR_1140	ZR	NA	1980	Briggs, K. B.	Comparison of riparian birds along a 5 km stretch of the River Lune, Arkholme.	NA
ZR_1152	ZR	NA	1993	Briggs, S. V.; Thornton, S. A.; Hodgson, P. F.	Characteristics of river red gums used by nesting waterbirds.	NA
ZR_1153	ZR	10.2307/3536591	1990	Brigham, R. M.; Sarell, M. J.; Harris, C. G.	Roosting of northern flichers (Colaptes auratus) under a concrete bridge.	NA
ZR_1157	ZR	NA	1998	Brito, J. C.; Paulo, O. S.; Crespo, E. G.	Distribution and habitats of Schreiber's green lizard (Lacerta schreiberi) in Portugal.	NA
ZR_11160	ZR	NA	1963	Broadley, D. G.	A report on the opportunity for zoological collecting afforded by the Beira-Feruka pipeline project.	NA
ZR_1168	ZR	NA	1985	Brode, J. M.	The importance of riparian systems to amphibians and reptiles.	NA
ZR_11165	ZR	NA	1995	Brodie, Andrew	La couleuvre d'esculape (Elaphe longissima) en Maine-et-Loire.	NA
ZR_11167	ZR	NA	1989	Brody, A. J.; Pelton, M. R.	Effects of roads on black bear movements in western North Carolina.	NA
ZR_11169	ZR	NA	1986	Broekhuizen, S.; van't Hoff, C. A.; Maaskamp, F.; Pauwels, T.	The importance of hedgerows for leading migrating badgers Meles meles (L., 1758).	NA
ZR_1179	ZR	NA	1980	Brooks, R. P.	A model of habitat selection and population estimation for muskrats (Ondatra zibethicus) in riverine environments in Massachusetts.	NA
ZR_1187	ZR	NA	1985	Brown, B. T.; Johnson, R. R.	Glen Canyon Dam, fluctuating water levels, and riparian breeding birds: the need for management compromise on the Colorado River in Grand Canyon.	NA
WOS_3881	WOS	10.2307/3671736	1989	BROWN, BT; TROSSET, MW	Nesting-Habitat Relationships of Riparian Birds along the Colorado River in Grand Canyon, Arizona	Southwestern Naturalist
ZR_1194	ZR	NA	2006	Brown, Greg	White-backed night-herons on the Vaal River.	NA
ZR_11189	ZR	NA	2010	Brown, Jefferey C.; Brooks, Daniel M.	A CASE OF A HARRIS' HAWK (PARABUTEO UNICINCTUS) ELECTROCUTED WHILE SEIZING PREY.	NA
ZR_1204	ZR	10.3101/1098-7096(2008)69[37:TEOSCA]2.0.CO;2	2008	Brown, T. Travis; Derting, Terry L.; Fairbanks, Kenneth	The effects of stream channelization and restoration on mammal species and habitat in riparian corridors.	NA
ZR_11198	ZR	NA	1994	Browne, S. J.; Clark, N. A.	A case study of the impacts of pipeline construction on bird distribution in the Duddon Estuary. Part 2: post construction, Winter 1993/94.	NA
ZR_11207	ZR	NA	2009	Bruggeman, Jason E.; Garrott, Robert A.; White, P. J.; Bjornlie, Daniel D.; Watson, Fred G. R.; Borkowski, John J.	Bison winter road travel: facilitated by road grooming or a manifestation of natural trends?	NA
ZR_11209	ZR	NA	2009	Bruggeman, Jason E.; Garrott, Robert A.; White, P. J.; Watson, Fred G. R.; Wallen, Rick W.	Effects of snow and landscape attributes on bison winter travel patterns and habitat use.	NA
ZR_11226	ZR	NA	1987	Buchanan, J. B.	Seasonality in the occurrence of long tailed weasel road kills.	NA
ZR_11230	ZR	NA	1989	Buck-Dobrick, T.; Dobrick, R.	The behaviour of migrating anurans at a tunnel and fence system.	NA
ZR_1249	ZR	NA	1992	Buczek, Tomasz	Wintering white-tailed eagles (Haliaeetus albicilla) in Poland.	NA
ZR_1251	ZR	NA	2004	Buech, Richard R.; Nelson, Mark D.; Hanson, Lynelle G.; Ewert, Michael A.	Clemmys insculpta (Wood turtle). Hatching failure.	NA
ZR_1253	ZR	NA	1995	Buehler, David A.	A geographic information system to identify potential bald eagle breeding habitat for southeastern United States rivers and reservoirs.	NA
ZR_11259	ZR	NA	1984	Burden, K.	A survey of hedgehog road mortality in the Castleford district 1980-82.	NA
ZR_11264	ZR	NA	1992	Burger, J.; Gochfeld, M.	Vulnerability and mortality of young Australian magpies on roads.	NA
ZR_1283	ZR	NA	1996	Burghause, Frank	[40 years of the muskrat in Rhineland-Palatinate. The significance of this rodent and attempts to restrict damage.]	NA
ZR_11271	ZR	NA	2010	Burkard, Joerg	[Lynx and wild cat in east Hesse.]	NA
ZR_1288	ZR	NA	2010	Burkhard, Wolf-Dieter; Burkhard, Ursula	[Bats in the Seebach valley.]	NA
ZR_11274	ZR	NA	1990	Burnhill, M. J.	Survey of house martins' nests on the estate at Wilberforce Road, Brighstone.	NA
ZR_1301	ZR	NA	1988	Burton, J. E.	Water projects and southwestern raptors.	NA
ZR_11295	ZR	NA	1991	Bush, B.; Browne-Cooper, R.; Maryan, B.	Some suggestions to decrease reptile roadkills in reserves with emphasis on the Western Australian wheatbelt.	NA
WOS_4311	WOS	10.2193/0091-7648(2005)33[745:FTFTRO]2.0.CO;2	2005	Butler, M. J.; Wallace, M. C.; Ballard, W. B.; DeMaso, S. J.; Applegate, R. D.	From the Field: The relationship of Rio Grande wild turkey distributions to roads	Wildlife Society Bulletin
ZR_11315	ZR	NA	1991	Bykov, A. V.; Lysikov, A. B.	Mole holes and pollution of forest soils adjacent to highways.	NA
ZR_11316	ZR	NA	2004	Bykova, Elena A.	The role of passenger railway transport in distribution of rodents in Uzbekistan.	NA
ZR_11331	ZR	NA	1999	Caldonazzi, Michele; Zanghellini, Sandro; Ferrari, Claudio; Flamini, Piero	[First experiences of protective barriers for amphibians during spawning migration in Trento.]	NA
ZR_11332	ZR	NA	1990	Cale, P.	The value of road reserves to the avifauna of the central wheatbelt of Western Australia.	NA
ZR_11343	ZR	NA	1987	Camby, A.; Maizeret, C.	Permeabilite des routes et autoroutes vis-a-vis des mammiferes carnivores: example des etudes menees dans les Landes de Gascogne par radio-poursuite.	NA
ZR_11353	ZR	NA	1984	Cameron, R. D.; Smith, W. T.; Whitten, K. R.	Effects of the Trans-Alaska Pipeline Corridor on the distribution and movements of caribou.	NA
ZR_11355	ZR	NA	1977	Cameron, R. D.; Whitten, K. P.	Second interim report on the effects of the Trans-Alaska pipeline on caribou movements.	NA
ZR_11360	ZR	NA	1979	Cameron, R. D.; Whitten, K. R.	Influence of the Trans-Alaska Pipeline Corridor on local distribution of caribou.	NA
ZR_11361	ZR	NA	1980	Cameron, R. D.; Whitten, K. R.	Big game investigations. Effects of the trans-Alaska pipeline on caribou movements.	NA
ZR_11362	ZR	NA	1982	Cameron, R. D.; Whitten, K. R.	Big game investigations. Effects of the trans-Alaska pipeline on caribou movements.	NA
ZR_11358	ZR	NA	1984	Cameron, R. D.; Whitten, K. R.; Smith, W. T.	Development and alteration of caribou movement patterns.	NA
ZR_11359	ZR	NA	1985	Cameron, R. D.; Whitten, K. R.; Smith, W. T.	Effects of the Trans-Alaska Pipeline on the distribution and movements of caribou.	NA
WOS_4491	WOS	NA	1993	CAMP, M.; BEST, LB	BIRD ABUNDANCE AND SPECIES RICHNESS IN ROADSIDES ADJACENT TO IOWA ROWCROP FIELDS	Wildlife Society Bulletin
ZR_11391	ZR	10.2307/3800400	1975	Carbaugh, B.; Vaughan, J. P.; Bellis, E. D.; Graves, H. B.	Distribution and activity of white-tailed deer along an interstate highway.	NA
ZR_1385	ZR	NA	1996	Cardoso da Silva, Jose	Distribution of Amazonian and Atlantic birds in gallery forests of the cerrado region, South America.	NA
ZR_1386	ZR	NA	1999	Cardoso de Sousa, Marcelo	Reproduction and feeding habits of Geranoaetus melanoleucus (Falconiformes: Accipitridae) in the states of Sergipe and Alagoas, Brazil.	NA
ZR_11407	ZR	NA	1984	Carr, P. C.; Pelton, M. R.	Proximity of adult female black bears to limited access roads.	NA
ZR_11417	ZR	NA	1991	Carroll, J. P.; Crawford, R. D.	Roadside nesting by gray partridge in north-central North Dakota.	NA
ZR_1433	ZR	NA	2004	Cartron, Jean-Luc E.; Dean, David A.; Stoleson, Scott H.; Polechla, Paul J.	Nesting of Swainson's hawks (Buteo swainsoni) in riparian woodlands of New Mexico.	NA
ZR_11427	ZR	NA	1996	Cartwright, Vince; Gash, Ted	Farmland nestboxes and motorway kestrels.	NA
ZR_11435	ZR	NA	2008	Casazza, Michael L.; Overton, Cory T.; Takekawa, John Y.; Rohmer, Tobias; Navarre, Kenneth	Breeding behavior and dispersal of radio-marked California clapper rails.	NA
ZR_1461	ZR	NA	2005	Castaneda G., Gamaliel; Garcia-de la Pena, Cristina; Lazcano, David; Salas-Westphal, Amorita	Notes on herpetofauna 7: herpetological diversity of the low basin of the Nazas River in Durango, Mexico.	NA
ZR_1472	ZR	NA	1987	Castrale, J. S.; Backs, S. E.; Howell, D.	Avian surveys along two river segments in southern Indiana.	NA
ZR_11455	ZR	NA	1994	Catley, Graham P.	More hobbies nesting on pylons.	NA
ZR_11462	ZR	NA	1994	Cattley, Tina	Hedgehog. Green lights.	NA
ZR_1485	ZR	NA	1985	Ceballos-G., G.	The importance of riparian habitats for the conservation of endangered mammals in Mexico.	NA
ZR_1509	ZR	NA	1996	Chacon, Guillem	The lesser shrike in the banks of the Cinca river.	NA
ZR_1519	ZR	10.1674/0003-0031(2005)153[0171:OISUAB]2.0.CO;2	2005	Chamberlin, Michael J.; Leopold, Bruce D.	Overlap in space use among bobcats (Lynx rufus), coyotes (Canis latrans) and gray foxes (Urocyon cinereoargenteus).	NA
ZR_1528	ZR	NA	1995	Chan, Ken	Bird community patterns in fragmented vegetation zones around streambeds of the Northern Tablelands, New South Wales.	NA
ZR_1541	ZR	NA	1996	Charles, Joseph K.	Small mammal diversity in riparian and dipterocarp habitats in Belalong forest, Brunei Darussalam.	NA
ZR_11506	ZR	NA	1988	Chelintsev, N. G.	[Calculation of bird population density by radial distance and angle of observation along a road.]	NA
ZR_1573	ZR	NA	1986	Chernyshov, V. M.	[Demographic peculiarities of migration and territorial connections of riparian Passeriformes in Barabin Forest steppe.]	NA
ZR_11530	ZR	NA	1997	Chiba, Issei; Watanabe, Osamu; Niwa, Shin-ichi	Spatial and seasonal patterns of habitat use by sika deer Cervus nippon yesoensis in the eastern part of Taisetsuzan National Park, northern Japan. 2. Habitat use in grassy right-of-way at the side of national highway.	NA
ZR_11532	ZR	NA	1974	Child, K. D.	Reaction of caribou to various types of simulated pipelines at Prudhoe Bay, Alaska.	NA
ZR_1642	ZR	10.2307/1564000	1988	Cintra, R.	Nesting ecology of the Paraguayan caiman (Caiman yacare) in the Brazilian Pantanal.	NA
ZR_11573	ZR	NA	2002	Claassen, Japie	Unusual lanner falcon behaviour.	NA
ZR_1652	ZR	NA	2008	Clark, Howard O.; Gworek, Jennifer R.	Thamnophis sirtalis fitchi (valley gartersnake). Habitat and behavior.	NA
ZR_11590	ZR	NA	1979	Clark, W. D.; Karr, J. R.	Effects of highways on red-winged blackbird and horned lark populations.	NA
WOS_5748	WOS	NA	1999	Clary, W. P.	Riparian-stream habitat responses to late spring cattle grazing	NA
ZR_1662	ZR	NA	1993	Clary, Warren P.; Medin, Dean E.	Vegetation, nesting bird, and small mammal characteristics - Wet Creek, Idaho.	NA
ZR_1669	ZR	NA	1994	Cleasby, Ingram	The 'not so common' sandpiper.	NA
ZR_11629	ZR	NA	2005	Cocker, Mark	Cream-coloured courser showing feeding attachment to desert roads.	NA
ZR_11633	ZR	NA	1995	Codoner, Nancy A.	Mortality of Connecticut birds on roads and at buildings.	NA
ZR_11658	ZR	NA	1995	Collister, Douglas M.; Henry, J. David	Preservation of loggerhead shrike (Lanius ludovicianus) habitat in southeastern Alberta.	NA
WOS_6043	WOS	10.2307/3801607	1988	COMPTON, BB; MACKIE, RJ; DUSEK, GL	FACTORS INFLUENCING DISTRIBUTION OF WHITE-TAILED DEER IN RIPARIAN HABITATS	Journal of Wildlife Management
ZR_1747	ZR	NA	2007	Conelli, Alberto Ezio; Nembrini, Marco	A radiotelemetric study of the habitats of three populations of dice snake, Natrix tessellata (Laurenti, 1768) in the Ticino Canton (Switzerland).	NA
ZR_11672	ZR	NA	1976	Conner, R. N.; Adkisson, C. S.	Concentration of foraging common ravens along the trans-Canada highway.	NA
ZR_1757	ZR	NA	1990	Consolo, S. L.; Hanson, D. D.	Distribution of beaver in Yellowstone National Park 1988-1989.	NA
ZR_11681	ZR	NA	1994	Conway, Courtney J.; Eddleman, William R.	Virginia rail.	NA
ZR_11688	ZR	NA	2012	Cook, David G.; White, Sean; White, Paige; White, Elsie	RANA BOYLII (Foothill Yellow-legged Frog). UPLAND MOVEMENT.	NA
ZR_11689	ZR	NA	2011	Cooke, Arnold	The role of road traffic in the near extinction of common toads (Bufo bufo) in Ramsey and Bury.	NA
ZR_11692	ZR	NA	2011	Cooper, Daniel S.	TWO RECENT RECORDS OF THE CLAPPER RAIL FROM THE BALLONA WETLANDS, LOS ANGELES COUNTY, CALIFORNIA.	NA
ZR_11701	ZR	NA	1989	Corbett, K. F.	Amphibian fencing.	NA
ZR_1844	ZR	NA	1993	Coughlin, Paul F.; Higgins, Kenneth F.	Riparian habitats relative to wood duck management in South Dakota.	NA
ZR_1862	ZR	NA	1993	Craig, Diana L.; Carlson, Ann D.	A proposed landscape approach for managing late-successional forest and riparian habitats for associated vertebrate species.	NA
ZR_1866	ZR	NA	1995	Crane, Kelly; Smith, Michael; Reynolds, Doug	Horse pasture.	NA
ZR_1869	ZR	NA	1994	Cranston, Thurgess	Natural history of the Sierra Mountain kingsnake (Lampropeltis zonata multicincta).	NA
ZR_11755	ZR	NA	2010	Crawford, Robert L.; Doyle, Michael J.	KINOSTERNON SUBRUBRUM (Eastern Mud Turtle). MASS MOVEMENT AND MORTALITY.	NA
ZR_1878	ZR	NA	1997	Criado, Juan; Varela, Juan; Cuenca, Nereida	[Birds of river banks.]	NA
ZR_1882	ZR	NA	1999	Critchley, C. N. R.; Hodkinson, D. J.; McKenzie, S. E.	Potential benefits to water voles (Arvicola terrestris) of waterside buffer strips in an agri-environment scheme.	NA
ZR_11771	ZR	NA	1986	Crockett, A. B.; Green, R. A.	Mule deer in the city of Boulder: an urban wildlife conflict and management alternatives.	NA
ZR_1892	ZR	NA	1985	Cross, S. P.	Responses of small mammals to forest riparian perturbations.	NA
ZR_1893	ZR	NA	2009	Crossland, Andrew C.; Butcher, Scott	Clutch size and nest-site fidelity for double-banded plovers Charadrius bicinctus nesting on braided riverbeds in New Zealand.	NA
ZR_1905	ZR	10.2307/1445628	1989	Crump, M. L.; Pounds, J. A.	Temporal variation in the dispersion of a tropical anuran.	NA
ZR_11792	ZR	NA	1992	Cuisin, Michel	Influence de la construction de la ligne du TGV-Atlantique sur les oiseaux dans la foret domaniale de Dourdan (91).	NA
ZR_11798	ZR	NA	1975	Cunningham-van Someren, G. R.	Monkey arboreal highway and other activities.	NA
ZR_11804	ZR	NA	1983	Curatolo, J.	Caribou response to the pipeline/road complex in the Kuparuk Oilfield, Alaska.	NA
ZR_11851	ZR	NA	1997	Daming, Zhang; Tao, Jiang; Mahmut; al, et	Spreading again along with the railway of Rattus norvegicus and its regulatiag [regulating] methods in Xinjiang.	NA
ZR_1989	ZR	NA	1986	Darakchiev, A.; Philipova, Yu	Territorial distribution of some species of the plover birds along the middle reaches of the River Strouma.	NA
ZR_1991	ZR	NA	1992	Darolova, A.	Nesting of two pairs of avocet (Recurvirostra avosetta Linnaeus, 1758) near Gabcikovo.	NA
ZR_1997	ZR	NA	1993	Darveau, Marcel; Huot, Jean; Belanger, Louis; Ruel, Jean-Claude	Mid-term effects of windfall on bird use of riparian forest strips.	NA
ZR_11877	ZR	NA	1986	Dau, J. R.; Cameron, R. D.	Effects of a road system on caribou distribution during calving.	NA
ZR_11905	ZR	NA	2002	Dawson, D. G.	Roads and habitat corridors for animals and plants.	NA
WOS_7009	WOS	10.1080/00222933.2011.563138	2011	de Barros, Fabio Monteiro; Monteiro Granzinolli, Marco Antonio; Garcia Pereira, Ricardo Jose; Motta-, Jose Carlos	Home range and habitat use by the roadside hawk, Rupornis magnirostris (Gmelin, 1788) (Aves: Falcaniformes) in southeastern Brazil (vol 45, pg 65, 2011)	Journal of Natural History
ZR_11917	ZR	NA	1996	de Boer, Peter; Koks, Ben	Hobbies Falco subbuteo breeding in high voltage transmission towers in the Province of Groningen.	NA
ZR_11927	ZR	NA	1996	De Fraine, Rogier	[9 buzzards, 2 kestrels, 1 barn owl, 2 tawny owls and 1 long-eared owl...]	NA
ZR_11931	ZR	NA	2001	De Goede, Koos; Jenkins, Andrew	Electric eagles of the Karoo.	NA
WOS_7139	WOS	10.1016/j.mambio.2009.02.001	2010	de Redon, Louis; Machon, Nathalie; Kerbiriou, Christian; Jiguet, Frederic	Possible effects of roadside verges on vole outbreaks in an intensive agrarian landscape	Mammalian Biology
ZR_12019	ZR	NA	2013	de Swardt, Dawid H.	White-backed Vultures nesting on electricity pylons in the Boshof area, Free State, South Africa.	NA
WOS_7168	WOS	NA	2011	de Vos-Rouweler, A. J. M.; Doxiadis, G. G. M.; de Groot, N.; Bontrop, R. E.	DR region composition in primates: all roads lead to Rome	Tissue Antigens
ZR_12032	ZR	NA	1985	de Waal Malefyt, J. J.	Effects of vegetation management on breeding bird populations along electric transmission rights of way.	NA
ZR_12033	ZR	NA	2000	de Wit, Paul	Saving toads from traffic.	NA
ZR_11908	ZR	10.2989/00306520609485516	2006	Dean, W. R. J.; Milton, S. J.; Anderson, M. D.	Use of road kills and roadside vegetation by pied and Cape crows in semi-arid South Africa.	NA
ZR_11910	ZR	NA	2006	Dean, W. R. J.; Yeaton, R. I.; Milton, S. J.	Foraging sites of turkey vultures Cathartes aura and common ravens Corvus corax in central Mexico.	NA
ZR_2058	ZR	NA	1985	Deane, J. G.; Holing, D.	Ravage the rivers, banish the birds.	NA
ZR_2072	ZR	NA	1988	Debus, S.	Search for red goshawk in New South Wales.	NA
WOS_7240	WOS	NA	2000	DeGraaf, R. M.; Yamasaki, M.	Bird and mammal habitat in riparian areas	NA
ZR_11968	ZR	NA	1986	Dell, D. A.; Zwank, P. J.	Impact of a high-voltage transmission line on a nesting pair of southern bald eagles in southeast Louisiana.	NA
ZR_2140	ZR	NA	2013	Delvaux, Charles	[Observation of Testudo boettgeri in its biotope in Corfu.]	NA
ZR_11996	ZR	NA	2001	Dennis, M. K.	The birds of the inner Thames: An avian highway.	NA
ZR_12002	ZR	NA	1986	Derckx, H.	The effectiveness of provisions for badgers Meles meles (L., 1758) at a motorway in the Netherlands.	NA
ZR_2183	ZR	NA	2001	Desbiolles, Philippe	A sand martin Riparia riparia breeding colony in a natural site on the bank of the river Broye (canton Fribourg, Switzerland).	NA
ZR_12015	ZR	NA	2005	Desroches, Jean-Francois; Picard, Isabelle	[Mortality of turtles on the roads of Outaouais.]	NA
ZR_12034	ZR	NA	1989	Dexel, R.	Investigations into the protection of migrant amphibians from the threats from road traffic in the Federal Republic of Germany - a summary.	NA
ZR_12037	ZR	NA	1988	Dhindsa, M. S.; Sandhu, J. S.; Sandhu, P. S.; Toor, H. S.	Roadside birds in Punjab (India): relation to mortality from vehicles.	NA
ZR_2247	ZR	NA	1987	Dickson, J. G.; Huntley, J. C.	Riparian zones and wildlife in southern forests: the problem and squirrel relationships.	NA
ZR_2245	ZR	NA	1988	Dickson, James G.; Williamson, J. Howard	Small mammals in streamside management zones in pine plantations.	NA
ZR_12065	ZR	NA	1999	Dietz, Markus; Frank, Ralf; Pir, Jacques B.	The bat fauna of the 'Grunewald' forest in Luxembourg: a methodology approach.	NA
ZR_12075	ZR	NA	2012	Dinan, Lauren R.; Jorgensen, Joel G.; Brown, Mary Bomberger	INTERIOR LEAST TERN POWERLINE COLLISION ON THE LOWER PLATTE RIVER.	NA
ZR_2284	ZR	NA	1986	Dobkin, D. S.; Wilcox, B. A.	Analysis of natural forest fragments: riparian birds in the Toiyabe Mountains, Nevada.	NA
ZR_2286	ZR	NA	1994	Dobrowolski, Kazimierz A.	Bird diversity in ecotonal habitats.	NA
ZR_2287	ZR	NA	1997	Dobrowolski, Kazimierz A.	Bird diversity in ecotonal habitats.	NA
ZR_12098	ZR	10.2307/1564036	1989	Dodd, C. K.; Enge, K. M.; Stuart, J. N.	Reptiles on highways in north-central Alabama, USA.	NA
ZR_12109	ZR	NA	2014	Doi, Toshio	The carcasses of Mustelid animals from the roads around the forest in north-western Kobe City.	NA
ZR_2311	ZR	NA	1994	Dolch, Dietrich	[The importance of water bodies with special consideration of bank structure for mammals.]	NA
ZR_12120	ZR	NA	1997	Dominske, Kevin R.	Effects of the introduction of a pipeline right-of-way with planted travel corridors to a deer wintering area in northern New York.	NA
ZR_12124	ZR	NA	1992	Donald, P. F.	Preliminary report: winter bird survey of the proposed route of the Lackenby-Picton overhead transmission lines.	NA
ZR_12125	ZR	NA	1992	Donald, P. F.	Winter bird survey of the proposed route of the Lackenby-Picton overhead transmission lines.	NA
ZR_2323	ZR	NA	1989	Doncaster, P.; Jouventin, P.	Les ragondins.	NA
ZR_12134	ZR	NA	2015	Donihue, Colin M.; Lambert, Max R.; Watkins-Colwell, Gregory J.	PODARCIS SICULA (Italian Wall Lizard). HABITAT, INVASION OF SUBURBAN NEW ENGLAND.	NA
ZR_12146	ZR	NA	1993	Dorenbosch, Martijn	[Badgers in traffic.]	NA
ZR_2333	ZR	NA	2008	Dorigo, Luca; Lapini, Luca; Parodi, Roberto	[Green life: the flora and fauna of the water courses of Udine. Vertebrates.]	NA
ZR_12154	ZR	NA	1983	Doucet, G. J.; Brown, D. T.; Lamothe, P.	White-tailed deer response to conifer plantation as a mitigation measure in a power line right-of-way located in a Quebec deer yard.	NA
ZR_12155	ZR	NA	1974	Doucet, G. J.; Sarrazin, J.-P. R.; Bider, J. R.	Use of highway overpass embankments by the woodchuck, Marmota monax.	NA
ZR_12156	ZR	NA	1997	Doucet, G. Jean; Brown, David T.	Snowshoe hare, red squirrel and gray squirrel winter activity in a 120 kV powerline right-of-way and in adjacent forests.	NA
ZR_12157	ZR	NA	1997	Doucet, G. Jean; Garant, Yves	White-tailed deer (Odocoileus virginianus) use of forested travel corridors in a twin 735 kV powerline right-of-way - 20 years of observations.	NA
ZR_12161	ZR	10.2307/2402814	1977	Douglass, R. J.	Effects of a winter road on small mammals.	NA
ZR_2349	ZR	NA	1986	Doyle, A. T.	Small mammal micro- and macrohabitat selection in streamside ecosystems.	NA
WOS_7973	WOS	10.2307/1381312	1990	DOYLE, AT	USE OF RIPARIAN AND UPLAND HABITATS BY SMALL MAMMALS	Journal of Mammalogy
ZR_2356	ZR	NA	1995	Drake, C. Martin	The effects of cattle poaching on insects living at the margin of the River Itchen, Hampshire.	NA
ZR_2363	ZR	NA	1995	Drake, Martin	A brief survey of the insects of river banks with or without grazing along the River Itchen.	NA
ZR_12180	ZR	NA	1996	Dreesmann, Carolin	Further results on the skylark (Alauda arvensis) abundance in the cultivated areas of southern Lower Saxony (Sudniedersachsen, Germany).	NA
ZR_12182	ZR	NA	1990	Dreschel, T. W.; Smith, R. B.; Breininger, D. R.	Florida scrub jay mortality on roadsides.	NA
ZR_12188	ZR	NA	1986	Dronneau, C.; Wassmer, B.	Des nidifications sur pylones electriques chez le faucon hobereau, Falco subbuteo.	NA
ZR_12190	ZR	NA	1974	Dryden, R. L.; Jessop, C. S.	Impact analysis of the Dempster highway culvert on the physical environment and fish resources of Frog Creek.	NA
ZR_12191	ZR	NA	1992	d'Souza, Lancy; Singh, Mewa	Density and demography in roadside bonnet monkeys (Macaca radiata) around Mysore.	NA
ZR_12196	ZR	NA	1988	Dubrovsky, V. Yu	The special features of sinanthropic rodent populations of railway stations.	NA
ZR_12197	ZR	NA	1990	Dubrovsky, V. Yu	Peculiarities of great gerbiles [sic] settling within the subgrade of permanent way.	NA
ZR_12198	ZR	NA	1993	Dubrovsky, V. Yu	Ecological characteristics of Rhombombus [Rhombomys] opimus Lichtenstein and Meriones erythrourus Gray in ground railway embankment.	NA
ZR_12195	ZR	NA	1990	Dubrovsky, V. Yu; Bykov, A. V.	The change in clayey semi desert rodent fauna of Zavolga region along the transport tracks.	NA
ZR_2383	ZR	NA	1998	Ducasse, Valerie	[Note on the nesting of the European bee-eater Merops apiaster on the banks of the Arros (Hautes-Pyrenees) in 1994.]	NA
ZR_2385	ZR	NA	1988	Ducey, J.	Nest scrape characteristics of piping plover and least tern in Nebraska.	NA
WOS_8162	WOS	10.2307/3672127	1991	DUNCAN, DK; CORMAN, TE	RELATIVE ABUNDANCE OF DESERT SHREWS (NOTIOSOREX-CRAWFORDI) WITHIN THE SAN-PEDRO RIPARIAN NATIONAL CONSERVATION AREA, ARIZONA	Southwestern Naturalist
ZR_2413	ZR	NA	1984	Duncan, S. L.	Leaving it to beaver.	NA
ZR_12218	ZR	NA	1994	Dunlop, S.	Osprey nest on pylon.	NA
ZR_12257	ZR	NA	1995	Eakle, Wade L.	Lesser kestrels or not - a response to Hiraldo et al.	NA
ZR_12259	ZR	NA	2001	Eakle, Wade L.	Comments on the current status of the American kestrel in the West Indies.	NA
WOS_8338	WOS	NA	1992	ECKERT, CD; SAVARD, JPL; MCLAUGHLIN, RT	BREEDING BIRD COMMUNITIES IN MANAGED 2ND-GROWTH STANDS, RIPARIAN AREAS, AND OLD-GROWTH FORESTS ON NORTHEASTERN VANCOUVER ISLAND, BRITISH-COLUMBIA	Northwest Environmental Journal
ZR_12270	ZR	NA	1994	Eddleman, William R.; Conway, Courtney J.	Clapper rail.	NA
ZR_2466	ZR	NA	2002	Edisherashvili, G.	Quantitative description of avifauna in the Didi Liakhvi riverside forest.	NA
ZR_12279	ZR	NA	2006	Edwards, Mark A.	Habitat and movement ecology of grizzly bears in the Mackenzie Delta, NWT.	NA
ZR_12292	ZR	NA	1979	Eide, S.; Miller, S.	Big game investigations. Effects of the Trans-Alaska Pipeline on moose movement.	NA
ZR_12311	ZR	NA	1986	Elder, D. H.	An unusual black-billed magpie nest location.	NA
ZR_2493	ZR	NA	1994	Elias, Goncalo; Ferreira, Luis Filipe	Penduline tit Remiz pendulinus breeding in Portugal.	NA
ZR_2509	ZR	NA	1978	Ellis, R. W.; Whelan, J. B.	Impact of stream channelization on riparian small mammal and bird populations in Piedmont, Virginia.	NA
ZR_12333	ZR	NA	1987	Elton, D.	Beware - badgers crossing.	NA
ZR_2523	ZR	NA	1993	Emelyanova, L. G.	Small mammals (Mammalia: Insectivora, Lagomorpha, Rodentia) from the lower flow of Kochechum River, Nizhnyaa [Nizhnaya] Tunguska river basin.	NA
ZR_2533	ZR	NA	1998	Enge, Kevin M.	Herpetofaunal drift-fence survey of steephead ravines in 2 river drainages.	NA
ZR_2541	ZR	NA	1985	England, A. S.; Foreman, L. D.; Laudenslayer, W. F.	Composition and abundance of bird populations in riparian systems of the Californian deserts.	NA
ZR_12353	ZR	NA	1987	Epain-Henry, C.	L'autoroute A71 et les batraciens de Sologne methodes de protection.	NA
ZR_2555	ZR	NA	1990	Erard, C.	Ecologie et comportement des gobe-Mouches (Aves: Muscicapinae, Platysteirinae, Monarchinae) du nord-est du Gabon. Volume 2: organisation sociale et ecologie de la reproduction des Muscicapinae.	NA
ZR_12357	ZR	NA	1983	Ericson, J. E.	Aerial photo censusing of sandhill cranes: distributional effects of Interstate 80.	NA
ZR_2571	ZR	NA	1983	Erome, G.	Le castor dans la valle e du Rhone. Son ecologie, sa distribution.	NA
ZR_12367	ZR	NA	2002	Erritzoe, Johannes	Bird traffic casualties and road quality for breeding birds - a summary of existing papers with a bibliography.	NA
ZR_12369	ZR	NA	2006	Ervin, Edward L.; Kisner, David A.; Fisher, Robert N.	Bufo californicus (Arroyo toad). Mortality.	NA
ZR_12413	ZR	NA	2006	Ezaki, Yasuo; Mizota, Hiromi	Wintering of a peregrine falcon on an electricity pylon and its food in a suburban area of western Japan.	NA
ZR_12415	ZR	NA	1987	Faanes, C. A.	Bird behavior and mortality in relation to power lines in prairie habitats.	NA
ZR_2613	ZR	NA	1992	Faanes, Craig A.; Johnson, Douglas H.; Lingle, Gary R.	Characteristics of whooping crane roost sites in the Platte River.	NA
ZR_12418	ZR	NA	2007	Facon, David; Hourson, Laurence; Tupigny, Richard	[Observations of amphibians in Ternoise Valley (Pas-de-Calais) in March 2006 - new data on distribution, behavioural factors and demonstration of risky road sectors.]	NA
ZR_12422	ZR	NA	2012	Faggyas, Szabolcs; Puky, Miklos	Construction and preliminary monitoring results of the first ACO Wildlife Pro amphibian mitigation systems on roads in Hungary.	NA
ZR_2623	ZR	NA	1997	Faivre, Bruno; Roche, Jean; Frochot, Bernard	Comparison of the bird populations of the Allier and upper Loire rivers.	NA
WOS_8934	WOS	10.2307/3800834	1978	FALK, NW; GRAVES, HB; BELLIS, ED	HIGHWAY RIGHT-OF-WAY FENCES AS DEER DETERRENTS	Journal of Wildlife Management
ZR_12436	ZR	NA	1998	Famolaro, Peter; Newman, Jeff	Occurrence and management considerations of California gnatcatchers along San Diego County highways.	NA
ZR_2635	ZR	NA	1999	Farago, Imre Csaba	Data on the numbers and habitat selection of grey wagtail (Motacilla cinerea) in Zala county (Hungary).	NA
ZR_2643	ZR	NA	1994	Farley, Greg H.; Ellis, Lisa M.; Stuart, James N.; Scott, Norman J.	Birds of restored and mature riparian woodlands in the Middle Rio Grande Valley.	NA
ZR_2646	ZR	NA	1999	Farmer, Chris	The density and distribution of brown-headed cowbirds: the central coastal California enigma.	NA
ZR_12451	ZR	NA	1986	Farquharson, E.	Ring roads and badgers.	NA
ZR_12467	ZR	NA	1993	Fehlberg, U.; Pohlmeyer, K.	Impact of a motorway (ecological barrier) on mammalian wildlife.	NA
ZR_2662	ZR	NA	1994	Feiler, Manfred	[Small water bodies as habitats for dragonflies and birds.]	NA
ZR_12474	ZR	NA	1989	Feldmann, R.; Geiger, A.	Protection for amphibians on roads in Nordrhein-Westphalia.	NA
WOS_9174	WOS	NA	2004	Ferguson, H. L.	Relative abundance and diversity of winter raptors in Spokane county, eastern Washington	Journal of Raptor Research
ZR_12486	ZR	NA	1998	Fernandez Garcia, Jose Maria	Relationship between mortality in electric power lines and avian abundance in a locality of Leon (NW of Spain).	NA
WOS_9229	WOS	NA	2003	Ferrari, S. F.; Iwanaga, S.; Ravetta, A. L.; Freitas, F. C.; Sousa, B. A. R.; Souza, L. L.; Costa, C. G.; Coutinho, P. E. G.	Dynamics of primate communities along the Santarem-Cuiaba highway in south-central Brazilian Amazonia	NA
ZR_12491	ZR	NA	1987	Ferrer, M.; de la Riva, M.	Impact of power lines on the population of birds of prey in the Donana National Park and its environments.	NA
ZR_12493	ZR	NA	1999	Ferrer, Miguel; Janss, Guyonne F. E.	Birds and power lines: collision, electrocution and breeding.	NA
ZR_12499	ZR	NA	1978	Ferris, C. R.	Effects of Interstate 95 on songbirds and white-tailed deer in northern Maine.	NA
ZR_2721	ZR	NA	1999	Festetics, Antal; Leisler, Bernd	The breeding colonies of herons and spoonbills at Lake Neusiedl - population trends, nestsite selection and conservation.	NA
ZR_2754	ZR	NA	1985	Finch, D. M.	A weighted-means ordination of riparian birds in southeastern Wyoming.	NA
ZR_2755	ZR	NA	1987	Finch, D. M.	Bird-habitat relationships in subalpine riparian shrublands of the central Rocky Mountains.	NA
ZR_2748	ZR	NA	1993	Finch, Deborah M.; Marshall, Robert M.	Bird use of riparian habitats in north-central Arizona during fall migration - results and recommendations.	NA
ZR_2751	ZR	NA	1995	Finch, Deborah M.; Wolters, Gale L.; Yong, Wang; Mund, Mary J.	Plants, arthropods, and birds of the Rio Grande.	NA
ZR_2752	ZR	NA	1996	Finch, Deborah M.; Yong, Wang	Sparrow migration along a river corridor in desert grassland.	NA
ZR_2753	ZR	NA	2000	Finch, Deborah M.; Yong, Wang	Landbird migration in riparian habitats of the middle Rio Grande: a case study.	NA
WOS_9346	WOS	10.2307/1941355	1989	FINCH, DM	HABITAT USE AND HABITAT OVERLAP OF RIPARIAN BIRDS IN 3 ELEVATIONAL ZONES	Ecology
WOS_9347	WOS	10.2307/1368069	1989	FINCH, DM	RELATIONSHIPS OF SURROUNDING RIPARIAN HABITAT TO NEST-BOX USE AND REPRODUCTIVE OUTCOME IN HOUSE WRENS	Condor
ZR_2762	ZR	10.2307/3670577	1986	Finley, R. B.; Choate, J. R.; Hoffmeister, D. F.	Distributions and habitats of voles in southeastern Colorado and northeastern New Mexico.	NA
ZR_2768	ZR	NA	2000	Fischer, Richard	Width of riparian zones for birds.	NA
WOS_9418	WOS	NA	2007	Fishman, Robert	On Big Beaver Road: Detroit and the diversity of American metropolitan landscapes	Places-a Forum of Environmental Design
ZR_12550	ZR	NA	1995	Flickinger, Edward L.	Loggerhead shrike fatalities on a highway in Texas.	NA
ZR_12555	ZR	NA	1995	Florit, Fabrizio; Parodi, Roberto; de Franceschi, Paolo	Observations on species nesting on electricity pylons in intensive farming areas of the inner Friuli plain.	NA
ZR_2810	ZR	NA	1996	Floss, Isabelle; Nievergelt, Franzi	Number of grey wagtails Motacilla cinerea in the Kusnachter Tobel (Canton of Zurich).	NA
ZR_12556	ZR	NA	2010	Flottmann, Hans-Joerg; Flottmann-Stoll, Anne	Studies of great crested newt (Triturus cristatus, Laurenti 1768) metapopulation in Saarland taking into particular consideration the separating effect of L.I.O. 103 between Altheim and Brenschelbach.	NA
ZR_2818	ZR	NA	2007	Fohr, Robert	Distribution and population size of the dipper (Cinclus cinclus) in the medium Vosges Mountains in Alsace.	NA
ZR_12572	ZR	NA	2011	Fonters, Remi; Le Bret, Veronique	[Census of amphibian road kill sites in Rhone-Alpes. Working towards a sustainable protection of endangered populations?]	NA
ZR_12575	ZR	NA	1993	Foppen, Ruud; Reijnen, Rien	[The breeding areas of willow warbler Phylloscopus trochilus along motorway verges, a waiting room for young males?]	NA
ZR_12589	ZR	NA	1994	Forrest, C.; Langston, R.	Effects of the M6 motorway widening on Gailey heronry.	NA
ZR_12597	ZR	NA	2008	Fortin, Christian	[Small mammals and land taken by electricity pylons situated in the forest environment.]	NA
ZR_12595	ZR	NA	2003	Fortin, Christian; Doucet, G. Jean	[Communities on small mammals along a line of electric pylon lines, situated in boreal forest.]	NA
ZR_12596	ZR	NA	2004	Fortin, Christian; Galois, Patrick; Ouellet, Martin; Doucet, G. Jean	[Use of electric pylon areas by amphibians and reptiles of the deciduous forest of Quebec.]	NA
ZR_12612	ZR	NA	2003	Fournier, Andre; Tombal, Jean-Charles	[Update on the status of the pine marten Martes martes in Mormal forest (Nord) and definition of risky road areas for the species.]	NA
ZR_2862	ZR	NA	1985	Fowler, L. J.; Fowler, D. K.	Breeding birds and vegetation along the Duck River in middle Tennessee.	NA
ZR_2863	ZR	NA	1987	Fowler, N. E.; Howe, R. W.	Birds of remnant riparian forests in northeastern Wisconsin.	NA
ZR_12614	ZR	NA	1973	Fowlie, W. J.	Occurrence of the western skink, Eumeces skiltonianus, along the Mojave River, Victorville, San Bernardino County, California.	NA
ZR_12616	ZR	NA	1989	Fox, J. B.	Grey herons taking roadside rats.	NA
ZR_2881	ZR	NA	1996	Franco, Claudia Machado	Bird communities in Guadiana river basin - Mertola region.	NA
ZR_12633	ZR	NA	2005	Franke, Mary Ann	Do groomed roads increase bison mileage? a new analysis sheds light on an old controversy.	NA
ZR_2886	ZR	NA	2005	Franklin, Carl J.; Killpack, David C.	Eurycea neotenes (Texas Salamander). Habitat utilization.	NA
ZR_12636	ZR	NA	1995	Franklin, Donald C.; Alley, Julienne C.	Some observations of foraging and social behaviour of the striped honeyeater in south-western New South Wales.	NA
ZR_2897	ZR	NA	1987	Franzreb, K. E.	Perspectives on managing riparian ecosystems for endangered bird species.	NA
ZR_12646	ZR	NA	1979	Fraser, D.	Sightings of moose, deer, and bears on roads in northern Ontario.	NA
ZR_2898	ZR	NA	1985	Fraser, J. D.; Frenzel, L. D.; Mathisen, J. E.; Shough, M. E.	Seasonal distribution of subadult bald eagles in three Minnesota habitats.	NA
ZR_2899	ZR	NA	1987	Fraser, W.	The urban birds of Johannesburg.	NA
ZR_12654	ZR	NA	2007	Freeman, Alastair; Bruce, Caroline	The things you find on the road: roadkill and incidental data as an indicator of habitat use in two species of tropical pythons.	NA
ZR_12657	ZR	NA	1996	Freitag, Bernd; Friedrich, Christoph	Hollow bridges of express motor highways in Styria (Austria) as roosts for bats (Mammalia, Chiroptera).	NA
ZR_2916	ZR	NA	1986	Freson, P.	[Carnivores in Belgium: the otter.]	NA
ZR_12667	ZR	NA	1999	Frias, Oscar	Seasonal dynamics of avian traffic casualties in central Spain: age and number of individuals and species richness and diversity.	NA
ZR_12671	ZR	NA	1996	Friedrich, Christoph; Freitag, Bernd	Breeding birds in and on bridges of motor-highways in Styria (Austria).	NA
ZR_12674	ZR	NA	1999	Fritts, Thomas H.; Chiszar, David	Snakes on electrical transmission lines: patterns, causes, and strategies for reducing electrical outages due to snakes.	NA
ZR_12690	ZR	NA	1986	Fukui, W.	A pair of kestrels nested in a railway bridge.	NA
ZR_12708	ZR	NA	1981	Fusari, M.; Juarez, S. M.; Stewart, G. R.; Edell, J.	Summary of a report for the California Department of Transportation and results of a brief survey of desert tortoises along I-15 south of Barstow, California.	NA
ZR_2987	ZR	NA	1974	Gaines, D.	A new look at the nesting riparian avifauna of the Sacramento Valley, California.	NA
ZR_12764	ZR	NA	2004	Gardner, Ty J.; Foley III, Daniel H.; Brodie, Edmund D. Jr; Young, Kevin V.	Barrier fences prevent road mortalities in the flat-tailed horned lizard (Phrynosoma mcallii).	NA
ZR_3054	ZR	NA	1987	Garrison, B. A.; Humphrey, J. M.; Laymon, S. A.	Bank swallow distribution and nesting ecology on the Sacramento River, California.	NA
ZR_3055	ZR	NA	1989	Garrison, B. A.; Schlorff, R. W.; Humphrey, J. M.; Laymon, S. A.; Michny, F. J.	Population trends and management of the bank swallow (Riparia riparia) on the Sacramento River, California.	NA
ZR_12780	ZR	NA	1989	Gasperetti, P. R.	Mammals of the Makkah Bypass.	NA
ZR_3065	ZR	NA	1996	Gates, Jody Adam	The use of hollows by birds and mammals in dead river red gum and black box trees at Disher Creek, Murray River National Park, South Australia.	NA
ZR_3066	ZR	NA	1986	Gatz, T. A.; Hegdal, P. L.	Local winter movements of four raptor species in central Colorado.	NA
ZR_12788	ZR	NA	1983	Gauthier, D. A.; Brown, W. K.; Theberge, J. B.	The Alaska Highway Gas Pipeline and the demography of the Burwash caribou herd.	NA
ZR_12795	ZR	NA	2002	Gehrt, Stanley D.	Evaluation of spotlight and road-kill surveys as indicators of local raccoon abundance.	NA
ZR_12796	ZR	NA	1979	Geibert, E. H.	Songbird diversity along a powerline right-of-way in an urbanizing Rhode Island environment.	NA
WOS_10427	WOS	10.2307/3808346	1980	GEIER, AR; BEST, LB	HABITAT SELECTION BY SMALL MAMMALS OF RIPARIAN COMMUNITIES - EVALUATING EFFECTS OF HABITAT ALTERATIONS	Journal of Wildlife Management
ZR_12817	ZR	NA	1985	Gerrard, P. N.; Gerrard, J. M.; Bortolotti, G. R.	The impact of road development and tourist access on a bald eagle population at Bernard Lake, Saskatchewan.	NA
ZR_12823	ZR	NA	1978	Getz, L. L.	Influence of interstate highways on small mammals.	NA
WOS_10535	WOS	10.2307/1379900	1978	GETZ, LL; COLE, FR; GATES, DL	INTERSTATE ROADSIDES AS DISPERSAL ROUTES FOR MICROTUS-PENNSYLVANICUS	Journal of Mammalogy
ZR_12842	ZR	NA	1992	Gibbs, J. P.; Shriver, W. G.; Melvin, S. M.	Spring and summer records of the yellow rail in Maine.	NA
ZR_3160	ZR	NA	1992	Gillespie, Graeme R.	Survey for the spotted tree frog (Litoria spenceri) in Victoria, February-March 1992.	NA
ZR_12893	ZR	NA	2003	Gnielka, Reinhard	[Breeding of the little winged plover on natural gas pipelines in the Salzwedel Altmark district.]	NA
ZR_12898	ZR	NA	1999	Godinez, Esteban	Roadside vulture counts in a central Panama province, Panama.	NA
ZR_3210	ZR	NA	2009	Goeken, Frank	[Disturbances at the breeding site: the kingfisher amongst the leisure community.]	NA
ZR_3211	ZR	NA	1985	Goerndt, D. L.; Schemmitz, S. D.; Zeedyk, W. D.	Managing common watercress and spring/seeps for Merriam's turkey in New Mexico.	NA
ZR_3212	ZR	NA	2013	Goerner, Martin	[On the Habitat Function of riparian butterbar stands for dippers (Cinclus cinclus).]	NA
ZR_12902	ZR	NA	2010	Goetz, Malte; Jerosch, Saskia	[Wild cats and roads - information on accident hotspots in East Harz.]	NA
ZR_12915	ZR	NA	2006	Goldingay, Ross L.; Taylor, Brendan D.	How many frogs are killed on a road in north-east New South Wales?	NA
ZR_12918	ZR	NA	2004	Goldstein, Michael I.; Hibbitts, Toby J.	Summer roadside raptor surveys in the western pampas of Argentina.	NA
ZR_3223	ZR	NA	1984	Gole, P.	Birds of a polluted river.	NA
ZR_3257	ZR	NA	2003	Gonzalez S., Luis Alejandro; Prieto Arcas, Antulio; Velasquez, Jenniffer; Angulo, Carlos; Ferrer, Hernan	Food habits of the lizard Ameiva bifrontata (Cope 1862) (Sauria: Teiidae) in the riverbanks of Tacal river, Mochima National Park, Sucre State, Venezuela.	NA
WOS_11023	WOS	NA	2009	Gonzalez-Medina, Erick; Trinidad Angulo-Gastelum, Ulises; Alfredo Castillo-Guerrero, Jose; Guevara-Medina, Miguel	Winter distribution and relative abundance of Black-capped Vireo (Vireo atricapilla) in Sinaloa, Mexico	Ornitologia Neotropical
ZR_12948	ZR	NA	1997	Goosem, Miriam	Internal fragmentation: the effects of roads, highways, and powerline clearings on movements and mortality of rainforest vertebrates.	NA
ZR_3285	ZR	NA	2004	Gottesman, Amy B.; Morrison, Michael L.; Krausman, Paul R.	Habitat use by brush mice (Peromyscus boylii) in southeastern Arizona.	NA
ZR_12979	ZR	NA	2006	Graf, Petra	[Noise proofing walls along railway lines: a new threat for the sand lizard?]	NA
ZR_12986	ZR	NA	2006	Graitson, Eric	[The herpetofauna of roadsides in Wallonia: analysis of 101 stations.]	NA
ZR_12983	ZR	NA	2000	Graitson, Eric; Hussin, Jose; Parent, Georges Henri	[The role of rail tracks in the settlement of reptiles in Belgium and some adjacent territories (north and north east of France, Grand-Duchy of Luxembourg).]	NA
ZR_12984	ZR	NA	2012	Graitson, Eric; Hussin, Jose; Vacher, Jean-Pierre	A 24 year survey of a northern Europe community of reptiles along a railway track in Belgium.	NA
ZR_3326	ZR	NA	1985	Gray, M. V.	Riparian forest as a habitat for the least Bell's vireo.	NA
ZR_13006	ZR	NA	1981	Green, C.	The badger survey.	NA
ZR_3341	ZR	NA	1989	Green, G. H.	Marsh warblers in Worcestershire.	NA
ZR_3342	ZR	NA	1997	Green, John; Hearle, Sharon	Distribution and conservation of the otter in Cambridgeshire (v.c. 29) - past and present.	NA
ZR_3368	ZR	NA	1991	Grettenberger, J.	Habitat fragmentation and forested wetlands on the Upper Mississippi River: potential impacts on forest-interior birds.	NA
ZR_13022	ZR	NA	1994	Grice, Phil	Powerlines and birds.	NA
ZR_13036	ZR	NA	1988	Grimm, J. W.; Yahner, R. H.	Small mammal responses to roadside habitat management in south central Minnesota.	NA
ZR_13041	ZR	NA	2004	Grishchenko, V. N.; Yablonovska-Grishchencko, E. D.	Breeding of great tit in concrete poles of contact system of the railway.	NA
ZR_13043	ZR	NA	2000	Griss, D. I.	The National Road Verge Small Mammal Survey.	NA
ZR_13049	ZR	NA	2001	Groppali, Riccardo	[Motorways and avifauna.]	NA
ZR_3402	ZR	NA	2003	Groppali, Riccardo	Birds during one year observations along an artificial watercourse: the Naviglio Civico of Cremona (N. Italy).	NA
ZR_3405	ZR	NA	2009	Groppali, Riccardo	Rivers, banks and oxbow ponds in the central Po plain: the birds of the river Po near Cremona (N Italy).	NA
ZR_13054	ZR	NA	1997	Grosselet, Olivier; Lode, Thierry	Impact of motorway upon amphibians: the example of the gutters.	NA
WOS_11467	WOS	10.1016/0143-1471(86)90005-X	1986	GRUE, CE; HOFFMAN, DJ; BEYER, WN; FRANSON, LP	LEAD CONCENTRATIONS AND REPRODUCTIVE SUCCESS IN EUROPEAN STARLINGS STURNUS-VULGARIS NESTING WITHIN HIGHWAY ROADSIDE VERGES	Environmental Pollution Series a-Ecological and Biological
ZR_3418	ZR	NA	1986	Gruschwitz, M.	Notes on the ecology of the dice snake, Natrix tessellata Laur. in West Germany.	NA
ZR_13080	ZR	NA	2011	Gubert, Leonardo	Dormouse activity on the A30 in Cornwall.	NA
ZR_3427	ZR	10.1898/NWN09-41.1	2010	Guderyahn, Laura; Musson, Curtis; Smithers, Ashley; Wishnek, Benyamin; Corkran, Charlotte	Observations of Oregon slender salamanders (Batrachoseps wrighti) in suburban landscapes.	NA
WOS_11562	WOS	NA	1989	GUINAN, DM; SEALY, SG	FORAGING-SUBSTRATE USE BY HOUSE WRENS NESTING IN NATURAL CAVITIES IN A RIPARIAN HABITAT	Canadian Journal of Zoology-Revue Canadienne De Zoologie
ZR_13117	ZR	NA	1996	Gunther, Edzard	Salamandra salamandra bernardezi Wolterstorff, 1928 in Oviedo, Spain: a tailed amphibian species inhabiting urban areas.	NA
ZR_13128	ZR	NA	2006	Gustafsson, Rolf	[Eagles killed by trains.]	NA
ZR_13129	ZR	NA	2006	Gustin, Marco; Mendi, Michele; Pedrelli, Mario	Red-footed falcon Falco vespertinus breeding in magpie's Pica pica nest built on a pylon.	NA
ZR_3468	ZR	NA	1992	Gutleb, A. C.	The otter in Austria: a review on the current state of research.	NA
ZR_13136	ZR	NA	1998	Guzman, Jose; Castano, Juan Pablo	Raptor mortality by electrocution in power lines in eastern Sierra Morena and Campo de Montiel (Spain).	NA
ZR_3478	ZR	NA	1995	Gynther, Ian C.	A striated heron Butorides striatus inhabiting a freshwater section of the Brisbane River.	NA
ZR_13142	ZR	NA	2005	Haas, D.; Nipkow, M.; Fiedler, D.; Schneider, R.; Haas, W.; Schuerenberg, B.	Protecting birds from powerlines.	NA
ZR_13143	ZR	NA	2005	Haas, Dieter	Losses of eagle owls Bubo bubo by electrocution.	NA
ZR_3495	ZR	NA	2010	Hafner, Andreas; Rieder, Joggi	[Amphibians in the Seebach valley.]	NA
ZR_3498	ZR	NA	2010	Hafner, Andreas; Rieder, Joggi	[Reptiles in the Seebach valley.]	NA
ZR_13157	ZR	NA	2008	Hagood, Susan; Bartles, Mary Jo	Use of existing culverts by eastern box turtles (Terrapene c carolina) to safely navigate roads.	NA
ZR_3510	ZR	NA	1996	Hairston, Nelson G.	Predation and competition in salamander communities.	NA
ZR_3525	ZR	NA	2002	Hall, Linnea S.; Morrison, Michael L.; Christoferson, Laurel L.; Martin, John; Bock, Carl E.; Strong, Thomas R.	Bird populations in riparian areas of southeastern Arizona in 1985-86 and 1994-95.	NA
ZR_3530	ZR	NA	1985	Hallberg, D. L.; Trapp, G. R.	Gray fox temporal and spatial activity in a riparian/agricultural zone in California's Central Valley.	NA
ZR_13178	ZR	NA	1993	Hambler, C.; Newing, J.; Hambler, K.	Population monitoring of the flightless rail Dryolimnas cuvieri aldabranus.	NA
ZR_13181	ZR	NA	2002	Hamers, T.; Smit, L. A. M.; Bosveld, A. T. C.; van den Berg, J. H. J.; Koeman, J. H.; van Schooten, F. J.; Murk, A. J.	Lack of a distinct gradient in biomarker responses in small mammals collected at different distances from a highway.	NA
WOS_12023	WOS	NA	1996	Haner, T. W.; Moulton, M. P.; Choate, J. R.; Redfearn, T. P.	Species composition of small mammals at an interstate highway interchange	Southwestern Naturalist
ZR_3564	ZR	NA	1988	Hanmer, D. B.	Red-winged pratincoles in Malawi.	NA
ZR_3572	ZR	NA	2000	Hanowski, JoAnn M.; Wolter, Peter T.; Niemi, Gerald J.	Effects of riparian buffers on landscape characteristics: implications for breeding birds.	NA
ZR_13237	ZR	NA	2006	Harris, Herbert S.	Periodic species abundance in snakes.	NA
ZR_13245	ZR	NA	1979	Harrison, G. H.	Badger subways.	NA
ZR_13247	ZR	NA	2006	Harrison, Keith	Pied crows nesting along the R27.	NA
ZR_13260	ZR	NA	1991	Hartley, R.	Kori bustard and secretary bird electrocuted.	NA
ZR_13268	ZR	NA	2015	Hartzell, Sean M.	CHRYSEMYS PICTA (Painted Turtle) and CHELYDRA SERPENTINA (Snapping Turtle). RAILROAD MORTALITY.	NA
ZR_13267	ZR	NA	2015	Hartzell, Sean M.	Terrapene carolina carolina (Eastern Box Turtle): Railroad nesting.	NA
ZR_13273	ZR	NA	1988	Harvey, T. E.	Breeding biology of the California clapper rail in south San Francisco Bay.	NA
ZR_13283	ZR	NA	1989	Haslinger, H.	Migration of toads during the spawning season at Stallauer Weiher Lake, Bad Tolz, Bavaria.	NA
WOS_12325	WOS	NA	2002	Hatch, K. A.; Tracy, C. R.	Winterkill of Rana luteiventris in a riparian habitat	Integrative and Comparative Biology
ZR_13291	ZR	NA	1985	Haug, E.	Merlin feeding on road kills.	NA
ZR_3659	ZR	NA	2010	Hauska, Guenter	[The kingfisher in the Regensburg area.]	NA
ZR_13299	ZR	NA	1974	Haverlack, E. G.; Michael, E. D.; Ferris, C. R.	Song bird occurrence around highway interchanges.	NA
WOS_12379	WOS	NA	1983	HAWKINS, CP; MURPHY, ML; ANDERSON, NH; WILZBACH, MA	DENSITY OF FISH AND SALAMANDERS IN RELATION TO RIPARIAN CANOPY AND PHYSICAL HABITAT IN STREAMS OF THE NORTHWESTERN UNITED-STATES	Canadian Journal of Fisheries and Aquatic Sciences
ZR_13311	ZR	NA	2012	Hayashi, Yoshio	A record of DOR (dead on road) amphibians and reptiles in Taihaku-ku, Sendai City.	NA
ZR_3682	ZR	NA	1996	Hazard, Lisa; Rotenberry, John T.	Herpetofauna and vegetation survey of Cornfield Spring and Piute Spring, east Mojave Desert, California.	NA
ZR_13337	ZR	NA	1999	Hedeen, Stanley E.; Hedeen, David L.	Railway-aided dispersal of an introduced Podarcis muralis population.	NA
ZR_3707	ZR	NA	1979	Hehnke, M.; Stone, C. P.	Value of riparian vegetation to avian populations along the Sacramento River system.	NA
ZR_3716	ZR	NA	2000	Heinricher, Alois	[The evoluition of fauna and flora during 10 years on the shore habitat of the Tassenbach Power Station reservoir with special consideration of avifauna.]	NA
ZR_3726	ZR	NA	1984	Helle, T.; Aspi, J.	Do sandy patches help reindeer against insects?	NA
ZR_3729	ZR	NA	1994	Hellwig, Ulrich; Kruger-Hellwig, Levinia	[Floral and faunal study and analysis of the regeneration potential of the Elbe river meadows.]	NA
ZR_13363	ZR	NA	1995	Henderson, I. G.; Langston, R. H. W.; Clark, N. A.	A study of the risk of collision with power lines by common terns at Shotton steel works, North Wales.	NA
WOS_12618	WOS	10.1111/j.1095-8649.1990.tb05871.x	1990	HENDERSON, PA; WALKER, I.	SPATIAL-ORGANIZATION AND POPULATION-DENSITY OF THE FISH COMMUNITY OF THE LITTER BANKS WITHIN A CENTRAL AMAZONIAN BLACKWATER STREAM	Journal of Fish Biology
ZR_3742	ZR	NA	1989	Hendricks, B. J.; Rieger, J. P.	Description of nesting habitat for the least Bell's vireo in San Diego County.	NA
ZR_13372	ZR	NA	1994	Hennig, Silke	[Workshop 2: ecology and protection of the jackdaw. Activity patterns and habitat utilization by the jackdaw (Corvus monedula L.) in the area of the Jena-Goschwitz colony during the winter.]	NA
ZR_13376	ZR	NA	1989	Henry, P.; Epain-Henry, C.	Amphibian protection on highway A71 in Sologne, France.	NA
ZR_3761	ZR	NA	1991	Henty, C. J.	Birds of the River Devon surveyed over ten years.	NA
ZR_3767	ZR	10.1080/00306525.1986.9633649	1986	Herholdt, J. J.	Diet of the barn owl at a riverine roost in the central Orange Free State.	NA
ZR_3783	ZR	NA	1995	Hero, Jean-Marc; Watson, Graeme F.; Gillespie, Graeme	The tadpole of Litoria spenceri (Anura: Hylidae).	NA
ZR_13397	ZR	NA	1996	Herron, Joseph	Red-tailed hawk nesting study on Interstate 79.	NA
ZR_3800	ZR	NA	2004	Heurich, Marco	Influence of the beaver on the ligneous vegetation along a stream in a central European mountain range.	NA
ZR_13413	ZR	NA	1997	Hicks, Roger K.	Purple-crowned lorikeets roosting and possibly nesting in metal pipes.	NA
ZR_13421	ZR	NA	2003	Higuchi, Hiroyoshi; Morishita, Emiko	What made the crow lay stones on the railroad tracks?	NA
ZR_13423	ZR	NA	1990	Hill, D. A.	Motorway sentinels: common buzzards, (Buteo buteo L.) on the Slavonski Brod-Zagreb Highway in January 1989.	NA
ZR_13424	ZR	NA	2001	Hill, David	Highways and birds.	NA
ZR_3825	ZR	NA	1990	Hill, J. P.; Hill, P. C.	A note on the occurrence of the Pacific jumping mouse (Zapus trinotatus) in the redwood forest.	NA
ZR_13437	ZR	NA	2008	Hinojosa-Huerta, Osvel; Rivera-Diaz, Juan Jose; Iturribarria-Rojas, Helena; Calvo-Fonseca, Alejandra	Population trends of yuma clapper rails in the Colorado River Delta, Mexico.	NA
ZR_13441	ZR	NA	1995	Hiraldo, Fernando; Bustamante, Javier; Donazar, Jose A.	On raptor roadside surveys in western Turkey and eastern Greece.	NA
ZR_3849	ZR	NA	1988	Hirano, T.; Higuchi, H.	The relationship between river width and the occurrence of riparian bird species in winter.	NA
ZR_3850	ZR	NA	1997	Hirano, Toshiaki	The effect of riverbank repairworks on wintering water bird populations.	NA
ZR_3851	ZR	NA	1995	Hird, Don; Paterson, Jim	The platypus on King Island.	NA
ZR_13453	ZR	NA	1986	Hobbs, J. C. A.; Ledger, J. A.	Powerlines birdlife and the golden mean.	NA
ZR_13454	ZR	NA	1986	Hobbs, J. C. A.; Ledger, J. A.	The environmental impact of linear developments; powerlines and avifauna.	NA
ZR_13459	ZR	10.2307/3535165	1985	Hobson, K. A.; Wilson, D.	Colony establishment by pelagic cormorants on man-made structures in southwest coastal British Columbia.	NA
ZR_13462	ZR	NA	2011	Hockings, Kimberley Jane	Behavioral flexibility and division of roles in chimpanzee road-crossing.	NA
ZR_13477	ZR	NA	2002	Hofer, Ulrich; Misslin, Serge; Camponovo, Ivan	[Monitoring of populations of the Aesculapian snake (Elaphe longissima), (Hierophis viridiflavus) and the grass snake (Natrix natrix helvetica) in the locality of Boschi, Stabio, Ticino.]	NA
ZR_13484	ZR	10.2307/3801681	1985	Holbrook, H. T.; Vaughan, M. R.	Influence of roads on turkey mortality.	NA
ZR_13491	ZR	NA	1986	Holisova, V.; Obrtel, R.	Vertebrate casualties on a Moravian road.	NA
ZR_13510	ZR	NA	1995	Holt, Eric A.; Mueller, James M.	Monitoring raven abundance at Yucca Mountain.	NA
ZR_3918	ZR	10.2307/1564009	1988	Hom, C. L.	Cover object choice by female dusky salamanders, Desmognathus fuscus.	NA
ZR_13517	ZR	NA	1995	Homburg, Bill	Rare rail rallies Ballarat birdos.	NA
ZR_13525	ZR	NA	1989	Hop, K. D.; Higgins, K. F.; Nomsen, D. E.	Vertebrate wildlife use of highway borrow pit wetlands in South Dakota.	NA
ZR_13526	ZR	NA	1986	Hope Jones, P.	Bird scavengers on Gwynedd road in 1986.	NA
WOS_13188	WOS	10.2307/3672924	2002	Hopton, M. E.; Choate, J. R.	Effects of habitat fragmentation on movement of small mammals along a Kansas highway	Southwestern Naturalist
ZR_13541	ZR	NA	1992	Hornbuckle, J.	Rooks nesting on electricity pylons at Stocksbridge, South Yorkshire.	NA
ZR_4004	ZR	NA	2008	Huang, Zu-hao; Liu, Bin; Chen, Dong; Chen, Pei-jun; Xi, Zhi-fu	Bird diversity of Gan River in Ji'an, Anhui Province.	NA
ZR_4006	ZR	NA	1976	Hubalek, Z.	[Birds and the embanked river bed of the River Dyje.]	NA
ZR_13587	ZR	NA	1983	Hubbard, J. P.	Roadside raptor counts as an indicator of the status of the turkey vulture in New Mexico.	NA
ZR_13586	ZR	NA	1988	Hubbard, J. P.; Shipman, J. W.; Williams, S. O.	An analysis of vehicular counts of roadside raptors in New Mexico, 1974-1985.	NA
ZR_13600	ZR	NA	1986	Hughes, S. W. M.	Cormorants roosting on electricity pylons.	NA
ZR_13606	ZR	NA	1998	Huijser, Marcel P.; Kooyman, Niels; van der Grift, Edgar A.	[Red deer outside the area of the Oostvaardersplassen?!]	NA
ZR_13611	ZR	NA	1979	Hull, C. N.	A comparative study of bird populations in a wooded expressway median.	NA
ZR_4054	ZR	NA	1989	Hunter, W. C.; Anderson, B. W.; Tollefson, R. E.	Bird use of natural and recently revegetated cottonwood-willow habitats on the Kern River.	NA
ZR_4055	ZR	NA	1987	Hunter, W. C.; Ohmart, R. D.; Anderson, B. W.	Status of breeding riparian-obligate birds in southwestern riverine systems.	NA
ZR_4057	ZR	NA	1993	Hunter, William C.; Pashley, David N.; Escano, Ronald E. F.	Neotropical migratory landbird species and their habitats of special concern within the southeast region.	NA
ZR_4060	ZR	NA	1980	Hurst, E.; Henhke, M.; Goude, C. C.	The destruction of riparian vegetation and its impact on the avian wildlife in the Sacramento River Valley, California.	NA
ZR_4089	ZR	NA	1989	Iborra, O.; Bayle, P.	Repartition en Provence de trois especes de rongeurs aquatiques: le castor Castor fiber, le ragondin Myocastor coypus et le rat musque Ondatra zibethicus.	NA
ZR_4092	ZR	NA	1996	Igarashi, Hideaki	Communal roosting of the night heron Nycticorax nycticorax.	NA
ZR_4127	ZR	NA	1990	Ionescu, D. T.	The factors which influence the favourite biotope for bee eater (Merops apiaster L.).	NA
ZR_13679	ZR	NA	1975	Irwin, A. G.	Motorway rats.	NA
ZR_13680	ZR	NA	1979	Irwin, L. L.; Peek, J. M.	Relationship between road closures and elk behaviour in northern Idaho.	NA
ZR_13688	ZR	NA	1987	Ishigaki, K.	The effects of a highway construction through the forest on avifauna.	NA
ZR_13689	ZR	NA	1987	Ishigaki, K.	The effects of a highway on the behaviour of birds.	NA
ZR_13699	ZR	NA	1996	Ivanovsky, V. V.	Present state and breeding ecology of the goshawk in Belarus.	NA
ZR_4155	ZR	NA	2005	Ivanter, Ernest V.; Makarov, Aleksandr M.	Daily activity of the common shrew (Sorex araneus).	NA
ZR_13708	ZR	NA	1998	Izawa, Masako; Doi, Teruo	Conservation of the Iriomote cat - preventing traffic accidents.	NA
ZR_4173	ZR	NA	1998	Jaberg, Christophe; Leuthold, Caroline; Blant, Jean-Daniel	Foraging habitats and feeding strategy of the parti-coloured bat Vespertilio murinus L., 1758 in western Switzerland.	NA
ZR_13715	ZR	10.2989/00306520309485398	2003	Jackson, H. D.	Another reason for nightjars being attracted to roads at night.	NA
ZR_13718	ZR	NA	1980	Jackson, L. W.	Minimizing impact of electric and gas transmission lines on deer winter habitat.	NA
ZR_13721	ZR	NA	1989	Jackson, S. D.; Tyning, T. F.	Effectiveness of drift fences and tunnels for moving spotted salamanders Ambystoma maculatum under roads.	NA
ZR_13735	ZR	NA	1998	Jaene, Johannes; Kruckenberg, Helmut; Bergmann, Hans-Heiner	[How divisible is the landscape? Investigations on the influence of roads on overwintering white-fronted geese (Anser albifrons) of the Dollart?]	NA
ZR_4202	ZR	NA	1985	Jakle, M. C.; Gatz, T. A.	Herpetofaunal use of four habitats of the middle Gila River drainage, Arizona.	NA
ZR_13743	ZR	NA	2000	Jakubiec-Benroth, Dorota	The influence of motorization and road network development on the mammal populations.	NA
ZR_13754	ZR	NA	2010	Jansen, Deborah; Sherwood, Krista; Fleming, Elizabeth	The I-75 project: lessons from the Florida panther.	NA
ZR_13759	ZR	NA	2001	Janss, Guyonne F. E.; Ferrer, Miguel	Avian electrocution mortality in relation to pole design and adjacent habitat in Spain.	NA
ZR_13758	ZR	NA	1996	Janss, Guyonne; Navazo, Victor; Roig, Jorge; Sanchez, Jesus; Ferrer, Miguel	White storks breeding on utility towers.	NA
ZR_4223	ZR	NA	1995	Janzekovic, Franc	Winter distribution of the green sandpiper (Tringa ochropus) and its habitat choice in Slovenia.	NA
ZR_13766	ZR	NA	1991	Jaren, Vemund; Andersen, Reidar; Ulleberg, Morten; Pedersen, Paul Harald; Wiseth, Bjornar	Moose - train collisions: the effects of vegetation removal with a cost-benefit analysis.	NA
ZR_13769	ZR	NA	1974	Jarvis, M. J. F.	High tension power lines as a hazard to larger birds.	NA
ZR_4231	ZR	NA	1995	Jasniy, E.; Sarawaiskiy, A.	Populations of small mammals in alluvial floodplain biotopes of the west and central Caucasus.	NA
ZR_13781	ZR	NA	1987	Jefferies, D. J.; Hanson, H. M.	The Minsmere otter release information gained from a detailed examination and analysis of the two casualties.	NA
ZR_13801	ZR	NA	1997	Jensen, Bjarke Huus	Relocation of a garlic toad (Pelobates fuscus) population.	NA
ZR_13811	ZR	NA	1984	Jessup, G.	Norfolk mammal report 1983, road casualty figures.	NA
ZR_4270	ZR	NA	1987	Jiliang, Yan; al, et	Distribution of Oncomelania snails along the stony slope of the embankment of Changjiang River dike in Xianning Prefecture Hubei.	NA
WOS_14587	WOS	NA	2011	Johnson, E. E.; Crino, O. L.; Breuner, C. W.	The effect of roads on avian communities: Indirect effects on nestlings through parental feeding rates	Integrative and Comparative Biology
WOS_14650	WOS	10.1139/x90-138	1990	JOHNSTON, CA; NAIMAN, RJ	BROWSE SELECTION BY BEAVER - EFFECTS ON RIPARIAN FOREST COMPOSITION	Canadian Journal of Forest Research-Revue Canadienne De Recherche Forestiere
ZR_4335	ZR	NA	1997	Joly, Pierre; Morand, Alain	Amphibian diversity and land-water ecotones.	NA
ZR_4341	ZR	NA	2003	Jones, Cheri A.; Beane, Ronald D.; Dickerson, Elizabeth A.	Habitat use by birds and mammals along the urban south Platte River in Denver, Colorado.	NA
ZR_4344	ZR	NA	1994	Jones, Clara B.	Injury and disease of the mantled howler monkey in fragmented habitats.	NA
ZR_13876	ZR	10.1111/j.1442-8903.2010.00516.x	2010	Jones, Darryl N.; Bond, Amy R. F.	Road barrier effect on small birds removed by vegetated overpass in South East Queensland.	NA
ZR_4356	ZR	NA	1988	Jones, K. B.	Comparison of herpetofaunas of a natural and altered riparian ecosystem.	NA
ZR_4353	ZR	NA	1985	Jones, K. B.; Conley Glinski, P.	Microhabitats of lizards in a southwestern riparian community.	NA
ZR_4358	ZR	NA	1988	Jones, K. Bruce	Distribution and habitat associations of herpetofauna in Arizona: comparisons by habitat type.	NA
ZR_4373	ZR	NA	2000	Jordan, Mike; Netherton, Chris	The ecology of lowland river water vole (Arvicola terrestris) populations and key considerations for conducting mitigation works.	NA
ZR_13898	ZR	NA	1972	Joselyn, G. B.; Tate, G. I.	Practical aspects of managing roadside cover for nesting pheasants.	NA
ZR_4381	ZR	NA	2005	Joshua, Justus	Breeding of sand martin (Riparia riparia) on the banks of River Ganga in Chilla part of Rajaji National Park, Uttar Pradesh.	NA
ZR_13920	ZR	NA	1996	Kaczensky, Petra; Knauer, Felix; Huber, Thomas; Jonozovic, Marko; Adamic, Miha	The Ljubljana-Postojna highway - a deadly barrier for brown bears in Slovenia?	NA
ZR_4436	ZR	NA	1982	Kalabukhov, N. I.; Popov, V. G.; Tropin, N. N.	Differences in composition of food of midday jirds (Meriones meridianus) from the right and left river banks of the lower Volga.	NA
ZR_4450	ZR	NA	2008	Kambourova, Nevena	Species diversity or ornithofauna along seven riverbanks in Rhodopes Mountains.	NA
WOS_15055	WOS	10.1139/cjz-2014-0326	2015	Kang, Dongwei; Wang, Xiaorong; Yang, Hongwei; Duan, Lijuan; Li, Junqing	Habitat use by giant pandas (Ailuropoda melanoleuca) in relation to roads in the Wanglang Nature Reserve, People's Republic of China (vol 92, pg 715, 2014)	Canadian Journal of Zoology
ZR_13951	ZR	NA	1991	Kankaanpaa, S.; Niemela, P.; Kalske, A.	Power lines and game animals.	NA
ZR_13977	ZR	NA	1990	Karr, J. R.	The avifauna of Barro Colorado Island and the Pipeline Road, Panama.	NA
ZR_13976	ZR	NA	1990	Karr, J. R.; Robinson, S. K.; Blake, J. G.; Bierregaard, R. O.	Birds of four Neotropical forests.	NA
ZR_13983	ZR	NA	2008	Karraker, Nancy E.	Impacts on road deicing salts on amphibians and their habitats.	NA
ZR_13987	ZR	NA	2010	Kartashev, A. G.; Prokhorov, A. G.; Pokharukov, V. A.	Effect of electric anticorrosive protection of oil pipelines on fish migration.	NA
ZR_13997	ZR	NA	2008	Karyakin, I. V.	Problem (birds and power lines): some positive effects exist.	NA
ZR_13993	ZR	NA	2005	Karyakin, I. V.; Barabashin, T. O.	Dark holes in the raptor populations (electrocutions of birds of prey on power lines in the western Betpak-Dala), Kazakhstan.	NA
ZR_4499	ZR	NA	2003	Katoh, Kazuhiro; Ichinose, Tomohiro; Takahashi, Toshimori	Classification of habitats by "Classification Tree": a case study on riparian habitats of birds.	NA
ZR_4503	ZR	10.2307/1380968	1985	Kaufman, D. W.; Peak, M. E.; Kaufman, G. A.	Peromyscus leucopus in riparian woodlands: use of trees and shrubs.	NA
ZR_14021	ZR	NA	1996	Kawula, Robert J.; Gates, J. Edward; Gates, William R.	Response of deer and medium-sized mammals to interstate highway construction and operation.	NA
ZR_14046	ZR	NA	1996	Keller, Verena; Bauer, Hans-Gunther; Ley, Hans-Wilhelm; Pfister, Hans Peter	[The significance of wildlife overpasses for birds.]	NA
WOS_15378	WOS	NA	2010	Kellner, Alexander W. A.	Origin of thickening in monocotyledon stems, slope variation and population structure in a riparian forest, and the influence of seagrass beds in fish community structure	Anais Da Academia Brasileira De Ciencias
ZR_4556	ZR	10.2193/0022-541X(2005)069<0424:HMFTES>2.0.CO;2	2005	Kelt, Douglas A.; Konno, Eddy S.; Wilson, James A.	Habitat management for the endangered Stephens' kangaroo rat: The effect of mowing and grazing.	NA
ZR_4590	ZR	NA	2003	Khan, Muhammad Sharif	Morphology of the Limnonectes tadpole, with notes on its feeding ecology and on the breeding habits of Limnonectes frogs in riparian Punjab.	NA
ZR_4596	ZR	NA	1973	Khazieva, S. M.; Bolotnikov, A. M.; Kamenskij, Yu N.; Nikol'skaya, V. I.	[Material on nesting birds on the right hand bank of the Kam River in the Dobryansk area in the Permsk region.]	NA
ZR_14082	ZR	NA	1981	Khokhlov, A. N.	[Bird mortality on roads.]	NA
ZR_14096	ZR	NA	1973	Kilgen, R. H.; Harris, A. H.	Length-weight relationships and condition coefficients of fishes trapped in brackish-water oil field pipeline canals in a Louisiana coastal marsh.	NA
ZR_4616	ZR	NA	2003	Kim, Jungsoo; Chae, Jinhwak; Koo, Tae-Hoe	Variation of bird community after implementation of close-to-nature river improvement techniques in the Yangjae Stream.	NA
ZR_4620	ZR	NA	1988	Kimsey, B.; Conley, M. R.	Habitat use by raptors in southcentral New Mexico.	NA
ZR_4624	ZR	NA	1978	King, A.; Potter, A.	Otter havens in Dorset.	NA
ZR_4636	ZR	NA	2002	Kingston, Mark B.; Catterall, Carla P.; Kordas, George S.	Use of riparian areas by terrestrial birds of the Mulga Lands - south west Queensland.	NA
ZR_4655	ZR	NA	1992	Kirsch, B.	Birding on the Breede.	NA
ZR_4663	ZR	NA	2010	Kistler, Roman	[Large mammals in the Seebach valley.]	NA
ZR_14142	ZR	NA	1999	Kitowski, Ignacy	The current problems of Tyto alba conservation in Zamosc region.	NA
ZR_4675	ZR	NA	2011	Klaus, Siegfried; Christner, Arnulf	[The habitat of riverine meadows: middle-spotted woodpeckers at their feeding site.]	NA
ZR_4676	ZR	NA	1985	Klebenow, D. A.; Oakleaf, R. J.	Historical avifaunal changes in the riparian zone of the Truckee River, Nevada.	NA
ZR_4693	ZR	NA	1999	Klenovsek, Dusan	[Birds on the River Sava.]	NA
ZR_14165	ZR	NA	2011	Klepsch, Rudolf; Glaser, Florian; Kammel, Werner; Kyek, Martin; Maletzky, Andreas; Schmidt, Axel; Smole-Wiener, Karina; Weissmair, Werner	[Amphibian protection on roads. Examples of temporary and permanent protection installations.]	NA
ZR_4725	ZR	NA	1985	Knopf, F. L.	Significance of riparian vegetation to breeding birds across an altitudinal cline.	NA
ZR_4726	ZR	NA	1986	Knopf, F. L.	Changing landscapes and the cosmopolitism of the eastern Colorado avifauna.	NA
ZR_14203	ZR	NA	1999	Kochert, Michael N.; Olendorff, Richard R.	Creating raptor benefits from powerline problems.	NA
ZR_14220	ZR	NA	1996	Kohari, Istvan	Hobby nesting in a pylon.	NA
WOS_16014	WOS	NA	2009	Kohn, Bruce E.; Anderson, Eric M.; Thiel, Richard P.	Wolves, Roads, and Highway Development	NA
ZR_14249	ZR	NA	1999	Kopf, Rudolf	[Observations on the red deer (Cervus elaphus L.) at individual motorway underpasses of the Tauern-Autobahn A10 between Spittal on the Drau and Villach.]	NA
ZR_4795	ZR	NA	2000	Kopij, Grzegorz	Bird communities of Acacia karroo dominated riparian habitats in the Free State.	NA
ZR_14256	ZR	NA	1986	Korn, H.	Sequential life-trapping and snap-trapping of rodents on a wooded island surrounded by roads.	NA
ZR_14257	ZR	NA	1991	Korn, H.	Rapid repopulation by small mammals of an area isolated by roads.	NA
ZR_14258	ZR	NA	1992	Korn, Horst	Detecting small mammal movements across roads with the aid of coloured bait.	NA
ZR_4800	ZR	NA	1984	Korneeva, T. M.; Bykov, A. V.; Rechan, S. P.	[Terrestrial vertebrates from the lower reaches of Onega River.]	NA
ZR_4801	ZR	NA	1983	Korobeynikova, V. P.; Dvornikova, N. P.	On the influence of feeding activities of the beaver (Castor fiber L.) upon the herbaceous plants in riverain phytocoenoses.	NA
ZR_14267	ZR	NA	1981	Koshelev, A. I.; Khodkov, G. I.	[Distribution and density of birds during the 1972 winter on the transregional motorway to Novosibirsk-Alma Ata-Bukhara.]	NA
ZR_14268	ZR	NA	1990	Koshelev, A. I.; Peresadko, L. V.	On wintering of herons, rails and waders in Odessa.	NA
ZR_14271	ZR	NA	1983	Koskela, K.; Nieminen, M.	Death among reindeer caused by traffic in Finland during 1976-80.	NA
ZR_14276	ZR	NA	1985	Koster, A.	Railway embankments are of importance for plants and animals.	NA
ZR_14280	ZR	NA	1986	Kostrzewa, A.; Ferrer-Lerin, F.; Kostrzewa, R.	Abundance, status and vulnerability of raptors and owls in parts of the Spanish Pyrenees.	NA
ZR_14286	ZR	NA	2010	Kovacs, Tibor; Vagi, Balazs; Torok, Janos	Utilization of frog tunnels under motorways in Hungary.	NA
ZR_14288	ZR	NA	1983	Kovalevsky, Yu V.; Korenberg, E. I.	Formation of the fauna of synantropic rodents in the zone of the Baikal-Amur railway mainline.	NA
ZR_14327	ZR	NA	1980	Kress, M. J.	The effects of habitat on the distribution of white-tailed deer (Odocoileus virginianus) along Pennsylvania interstate highway.	NA
ZR_4849	ZR	NA	1999	Kristin, Anton	Great cormorant (Phalacrocorax carbo) in the middle part of the Hron river: numbers, wintering and roosting sites.	NA
ZR_4864	ZR	NA	2012	Krueger, Hans Theo	[Common frog spawn as a bird trap.]	NA
ZR_14350	ZR	NA	1999	Krueger, Ralf M.; Klein, Herbert; Hoh, Edgar; Leuchs, Otmar	[Montagu's harrier Circus pygargus - breeding bird on the Mainfraenkischen Platten.]	NA
ZR_4875	ZR	NA	1998	Kruuk, H.; Carss, D. N.; Conroy, J. W. H.; Gaywood, M. J.	Habitat use and conservation of otters (Lutra lutra) in Britain: a review.	NA
ZR_14356	ZR	NA	1977	Krylov, D. G.; Rylnikov, V. A.; Krylova, T. B.; Baranovskij, S. Yn	Distribution, abundance and ectoparasites of small mammals in the region of the Baikal-Amur Railway (northern part of the Amur region).	NA
ZR_4879	ZR	NA	1978	Krzysik, A. J.	Resource allocation, coexistence and the niche structure of a stream-bank salamander community.	NA
ZR_14370	ZR	NA	2008	Kuehnel, Klaus-Detlef	Railway tracks as habitats for the sand lizard, Lacerta agilis, in urban Berlin, Germany.	NA
ZR_4892	ZR	NA	1995	Kufeld, Roland C.; Bowden, David C.	Mule deer and white-tailed deer inhabiting eastern Colorado Plains river bottoms.	NA
ZR_4898	ZR	NA	1999	Kuhnis, Jurgen B.	[Distribution, biology and endangerment of reptiles along the Rhine section Liechtenstein-Sargans-Werdenberg.]	NA
ZR_4918	ZR	NA	1994	Kurstjens, Gijs	[Breeding birds in the foreland between Nijmegen and Deest.]	NA
ZR_4924	ZR	NA	1989	Kus, B. E.; Miner, K. L.	Use of non-riparian habitats by least Bell's vireos.	NA
ZR_14408	ZR	NA	2008	Kusui, Yoshihisa	On some coprophagous lamellicorn beetles collected from dung of impious raccoon dog, in Kumano-kodo Road, Wakayama Prefecture.	NA
ZR_14411	ZR	NA	1979	Kuzikov, I. V.; Kovalevskij, Yu V.; Lipaev, V.; Chipanin, V. I.; Mitejko, V. P.; Volkov, V. I.; Dolgikh, A. M.; Belyaeva, N. S.	The small mammals of the Amur-Bureinsk section of the Baikal-Amur railway (BAM).	NA
ZR_14430	ZR	NA	1994	Lafontaine, L.; Gremillet, X.; Joncour, G.; Le Goff, P.; Sourget, G.; Ros, J.; Raynaud, M.; Cadiou, D.; Fortumeau, E.	Habitat quality. Taking into account the needs of otters Lutra lutra during habitat work schemes in Brittany, NW France, with reference to the costs.	NA
ZR_14437	ZR	NA	1989	Lambert, S.	New reserve saves newts.	NA
ZR_5001	ZR	NA	1998	Lambin, X.; Fazey, I.; Sansom, J.; Dallas, J.; Stewart, W.; Piertney, S.; Palmer, S. C. F.; Bacon, P. J.; Webb, A.	Aberdeenshire water vole survey: the distribution of isolated water vole populations in the upper catchments of the Rivers Dee and Don.	NA
ZR_14446	ZR	NA	1977	Lancaster, D. A.; Johnson, J. R.	Grackles nesting on interstates.	NA
ZR_14454	ZR	NA	1990	Lane, A. C.; Deaton, R. H.	A survey of hibernating bats in Drewton Railway Tunnel.	NA
ZR_14466	ZR	NA	1989	Langton, T. E. S.	Reason for preventing amphibian mortality on roads.	NA
ZR_14467	ZR	NA	1989	Langton, T. E. S.	Tunnels and temperature: results from a study of a drift fence and tunnel system for amphibians at Henly-on-Thames, Buckinghamshire, England.	NA
ZR_5028	ZR	NA	1989	Lanier, J. W.; Foss, C. F.	Habitat management for raptors on large forested tracts and shorelines.	NA
ZR_14485	ZR	NA	1993	LaRue, Edward L.	Distribution of desert tortoise sign adjacent to Highway 395, San Bernardino County, California.	NA
ZR_14494	ZR	NA	1997	Laufer, Hubert	Methods of investigating amphibian migrations to spawning pools within road construction planning - the common toad (Bufo bufo L.) as a case study.	NA
ZR_14495	ZR	NA	1998	Laufer, Hubert	A significant occurrence of the wall lizard, Podarcis muralis, at the railway embankment near Offenburg (Baden - Wurttemberg, Germany).	NA
ZR_14501	ZR	NA	2006	Laurance, Susan G. W.	Rainforest roads and the future of forest-dependent wildlife: a case study of understory birds.	NA
WOS_17112	WOS	10.1016/0006-3207(81)90061-6	1981	LAURSEN, K.	BIRDS ON ROADSIDE VERGES AND THE EFFECT OF MOWING ON FREQUENCY AND DISTRIBUTION	Biological Conservation
ZR_5089	ZR	NA	1978	Lavrovskij, A. A.; Pavlov, A. N.; Barkalova, A. G.; Ivanov, V. S.; Trofimov, V. I.	On the widening of the range of Rhombomys opimus (Rodentia) and its recurrent transition to the right Ural River bank.	NA
ZR_5099	ZR	10.2307/1446110	1991	Law, B. S.	Ontogenetic habitat shift in the eastern Australian water skink (Eulamprus quoyii)?	NA
WOS_17173	WOS	NA	2000	Lawton, G.	Roadside refuge - Motorways may be the last hope for some birds of prey	New Scientist
ZR_5112	ZR	NA	1985	Laymon, S. A.	Riparian bird community structure and dynamics: Dog Island, Red Bluff, California.	NA
ZR_5113	ZR	NA	1987	Laymon, S. A.	Brown-headed cowbirds in California: historical perspectives and management opportunities in riparian habitats.	NA
ZR_5114	ZR	NA	1989	Laymon, S. A.	A test of the California wildlife-habitat relationship system for breeding birds in valley-foothill riparian habitat.	NA
ZR_14604	ZR	NA	1995	le Mair, W.; Waaire, E. K.; van Rijck, H.	[Bittern along the motorway.]	NA
ZR_14534	ZR	NA	1995	Leach, G. J.	Relative abundance of bird species in roadside vegetation at Marburg, south-east Queensland.	NA
ZR_14532	ZR	NA	1994	Leach, G. J.; Watson, D. J.	Detectability of birds through the day in softwood scrub remnants and open eucalypt forest along roadsides at Tallegalla, south-east Queensland.	NA
ZR_5122	ZR	NA	1996	Leal, David A.; Meyer, Raymond A.; Thompson, Bruce C.	Avian community composition and habitat importance in the Rio Grande corridor of New Mexico.	NA
ZR_14537	ZR	NA	1982	Leaney, R.	The importance of disused railways (and other scrub) to farmland breeding birds.	NA
ZR_14557	ZR	NA	1987	Leclerq, B.	Influence des routes et voies de penetrations humaines sur les comportements de grands tetras et de gelinottes dans le Haut-Jura francais.	NA
ZR_14564	ZR	NA	1999	Ledger, John A.; Hobbs, Jonathan C. A.	Raptor use and abuse of powerlines in southern Africa.	NA
ZR_5157	ZR	NA	1994	Leguijt, Reindert	[Possibilities and effectiveness of mammal-friendly river bank management.]	NA
ZR_5179	ZR	NA	1998	Lekuona, J. M.	Selection of resting habitat by the grey heron Ardea cinerea during the non-breeding season along the River Ebro in Navarre (northern Spain).	NA
ZR_5175	ZR	NA	1998	Lekuona, Jesus M.; Artazcoz, Alberto	Joint roosts of great cormorant (Phalacrocorax carbo sinensis) and grey heron (Ardea cinerea) in Navarre [Navarra]: their importance in the conservation of the ornithofauna.	NA
ZR_14605	ZR	NA	2006	Lemaire, Michele; Arthur, Laurent; Morin, Amelie; Prevost, Claire	[Study of transit of bats and management proposals around the ring road east of Bourges (France).]	NA
ZR_14607	ZR	NA	1997	Lemoine, Guillaume	[A first tunnel route for Batrachia in the Nord.]	NA
ZR_5183	ZR	NA	1996	Lengyel, Szabolcs	Distribution and status of the common sandpiper (Actitis hypoleucos) and little ringed plover (Charadrius dubius) along two rivers in north-eastern Hungary.	NA
ZR_14634	ZR	NA	2000	Lesbarreres, David; Lode, Thierry	[The conservation of amphibians: example of motorway construction.]	NA
ZR_14638	ZR	NA	1985	Leshem, Y.	Griffon vultures in Israel: electrocution and other reasons for a declining population.	NA
ZR_5204	ZR	NA	1997	Leslie, David M.; Wood, G. Keith; Carter, Tracy S.	Attributes of least tern colonies along the Arkansas River, Oklahoma.	NA
ZR_14644	ZR	NA	2000	Lesnik, Aleksandra; Poboljsaj, Katja	Amphibians on roads.	NA
ZR_14653	ZR	NA	2005	Levin, A.; Karpov, F.	Notes of breeding the Saker falcon in central Kazakhstan.	NA
ZR_5229	ZR	NA	1987	Lewartowski, Z.; Piotrowska, M.	Breeding birds in the valley of the Narew River, Poland.	NA
ZR_14663	ZR	NA	1997	Lewis, Timothy L.; Ritzenthaler, John	Characteristics of hibernacula use by spotted turtles, Clemmys guttata, in Ohio.	NA
ZR_5241	ZR	NA	1976	Lewke, R. E.	Pre-impoundment study of vertebrate populations and riparian habitat behind Lower Granite Dam on the Snake River in southeastern Washington.	NA
ZR_14665	ZR	NA	2002	Ley, Andrew J.; Cook, Shirley M.; Williams, M. B.	Unusual nest-site of regent honeyeater.	NA
ZR_5264	ZR	NA	1990	Lichtenbeld, H. J.	[Stork project: a breakthrough for Dutch nature conservancy.]	NA
ZR_5268	ZR	NA	2009	Liebig, Nicolas; Pantel, Norbert	[Grazing of prealpine pine forests on river gravel banks of the Augsburg forest park reserve with Przewalski horses and red deer. Interim report after two years of the project.]	NA
ZR_5273	ZR	NA	1981	Liles, G.	The european otter, Lutra lutra.	NA
ZR_14709	ZR	NA	1991	Limpens, H. J. G. A.; Kapteyn, K.	Bats, their behaviour and linear landscape elements.	NA
ZR_14715	ZR	NA	1983	Lindberg, P.; Jaras, T.; Olsson, B. O.	Rough-legged buzzard, Buteo lagopus, merlin, Falco columbarius, and hooded crow, Corvus corone, breeding on power line poles.	NA
ZR_14721	ZR	10.1071/MU99017C	1999	Lindenmayer, D. B.; Pope, M. L.; Cunningham, R. B.	Roads and nest predation: an experimental study in a modified forest system.	NA
ZR_14722	ZR	NA	2008	Lindner, Martin	[Third peregrine falcon breeding site in Hoexter.]	NA
ZR_5295	ZR	NA	2011	Lindquist, Erik D.; Shin, Michael J.; Cossel, John O.; Stuckert, Adam M. M.; Bletz, Molly C.; Trimmer, Nicole C.	Chytrid in a Canopy Amphibian: Picado's Bromeliad Treefrog, Isthmohyla picadoi (Hylidae), Persists at a Site Affected by Batrachochytrium dendrobatidis.	NA
ZR_14724	ZR	NA	2002	Linhart, Wolfgang; Brunner, Helwig	The importance of road- and railway-side green belts for birds in agricultural landscapes of the Grazer and Leibnitzer Feld (Styria, Austria).	NA
ZR_5310	ZR	NA	2001	Lippuner, Mario; Heusser, Hans	Decline of amphibians of the flood plains in the Alpenrheintal.	NA
ZR_5312	ZR	NA	1995	Liro, Anna; Szacki, Jakub	Movements of small mammals along two ecological corridors in suburban Warsaw.	NA
ZR_14739	ZR	NA	1973	Litt, R.	Enquete sur la mortalite du herisson (Erinaceus europaeus Untie) (mammifere insectivore).	NA
ZR_5320	ZR	NA	1995	Little, Jon	Prothonotary warbler in Lincoln County and comments on regional distribution.	NA
ZR_5335	ZR	NA	1996	Livingston, M. F.; Schemnitz, S. D.	Summer bird/vegetation associations in tamarisk and native habitat along the Pecos River, southeastern New Mexico.	NA
ZR_5346	ZR	NA	1991	Lode, T.	Les deplacements du vision americain Mustela vison Schreber suivi par radiotracking sur une riviere bretonne.	NA
ZR_5347	ZR	NA	1992	Lode, Thierry	Typologie d'un milieu frequente par le vison d'Europe Mustela lutreola L. 1761.	NA
ZR_14790	ZR	NA	2011	Londei, Tiziano	Podoces ground-jays and roads: observations from the Taklimakan Desert, China.	NA
ZR_14792	ZR	NA	1968	Long, C. A.	Populations of small mammals of railroad right-of-way in prairie of central Illinois.	NA
ZR_5362	ZR	NA	1992	Long, C. A.; Long, C. F.	Some effects of land use on avian diversity in a Wisconsin's oak-pine savanna and riparian forest.	NA
ZR_5369	ZR	NA	1989	Lontkowski, J.	Passerines of north-west part of Wroclaw (including quantitative studies with mapping method).	NA
ZR_14807	ZR	NA	2004	Lopez, Roel R.	Florida Key deer (Odocoileus virginianus clavium): effects of urban development and road mortality.	NA
ZR_14809	ZR	NA	2001	Lopez-Garcia, Carlos	[Surface crossing devices for amphibians along railway lines.]	NA
ZR_14817	ZR	NA	1991	Lorek, G.; Stankowski, A.	Mortality of birds on the railway tracks in Poland.	NA
ZR_14819	ZR	NA	1992	Lorek, Grzegorz	Behaviour of birds of prey and carrion feeders on railways.	NA
ZR_14831	ZR	NA	2013	Louw, I.	Observations on spotted eagle-owls as 'road kills'.	NA
ZR_5420	ZR	NA	1985	Lowe, C. H.	Amphibians and reptiles in southwest riparian ecosystems.	NA
ZR_5422	ZR	NA	2005	Lowe, Winsor H.; Nislow, Keith H.; Likens, Gene E.	Forest structure and stream salamander diets: implications for terrestrial-aquatic connectivity.	NA
ZR_5429	ZR	NA	1996	Lu, Jianjian	Distribution and bioenergetics of wintering swan geese (Anser cygnoides) in the Yangtze River Valley, China.	NA
ZR_5445	ZR	NA	1996	Lugovoy, A. E.	River banks and bird communities.	NA
ZR_5455	ZR	NA	1991	Lunnon, R. M.; Reynolds, J. D.	Distribution of the otter Lutra lutra in Ireland, and its value as an indicator of habitat quality.	NA
ZR_5456	ZR	NA	1996	Lunnon, Ruth	Otter (Lutra lutra L.) distribution in Ireland.	NA
WOS_18799	WOS	NA	2004	Lusseau, D.	The energetic cost of path sinuosity related to road density in the wolf community of Jasper National Park	Ecology and Society
ZR_14884	ZR	NA	1993	Lustrat, P.; Julien, J.-F.	Un important gite d'hibernation de chauves-souris a Paris (France).	NA
ZR_14893	ZR	NA	1996	Lynch, J. F.; Carmen, W. J.; Saunders, D. A.; Cale, P.	Use of vegetated road verges and habitat patches by four bird species in the central wheatbelt of Western Australia.	NA
WOS_18847	WOS	NA	1979	LYON, LJ	HABITAT EFFECTIVENESS FOR ELK AS INFLUENCED BY ROADS AND COVER	Journal of Forestry
WOS_18848	WOS	NA	1983	LYON, LJ	ROAD DENSITY MODELS DESCRIBING HABITAT EFFECTIVENESS FOR ELK	Journal of Forestry
ZR_14957	ZR	NA	2007	Magnin, Benoit	[Presence of the little horseshoe bat (Rhinolophus hipposideros Bechstein) within the road viaduct (Perolles Bridge, Fribourg, Switzerland).]	NA
ZR_5536	ZR	10.2307/1444965	1986	Magnusson, W. E.; Franke, C. R.; Kasper, L. A.	Factors affecting densities of Cnemidophorus lemniscatus.	NA
ZR_5576	ZR	NA	1997	Malkmus, Rudolf	[Distribution and habitat selection of Perez's frog Rana perezi Seoane 1885 on Madeira, the Azores and the Canary Islands.]	NA
ZR_5600	ZR	NA	2000	Manel, Stephanie; Buckton, S. T.; Ormerod, S. J.	Effect of habitat structure on the distribution of Himalayan river birds.	NA
ZR_15014	ZR	NA	1987	Mannamaa, H.-M.; Teesaar, A.	The toll of animals taken by motorways.	NA
ZR_5612	ZR	10.2307/3535530	1986	Manuwal, D. A.	Characteristics of bird assemblages along liner riparian zones in western Montana.	NA
WOS_19326	WOS	10.2307/2423412	1966	MANVILLE, RH	ROADSIDE ABUNDANCE OF WOODCHUCKS	American Midland Naturalist
ZR_5625	ZR	NA	1980	Marchant, J. H.	Some results of the BTO Waterways Bird Survey.	NA
ZR_5636	ZR	NA	1994	Marchant, John H.; Gregory, Richard D.	Population changes of riparian birds along rivers and canals in the Severn-Trent region between 1989 and 1993.	NA
ZR_5637	ZR	NA	2010	Marchant, John H.; Hulme, Mark F.; Noble, David G.	Trends among breeding water birds during 1974-2009, along canals in British Waterways ownership.	NA
ZR_15082	ZR	NA	2006	Martin, Rob	Banded martin - an unusual nest site.	NA
ZR_15081	ZR	NA	1996	Martin, Rob; Pepler, David	Birding in the Hex River valley.	NA
ZR_15083	ZR	NA	1976	Martin, W. H.	Reptiles observed on the Skyline Drive and Blue Ridge Parkway, VA. Virginia herpet. Soc.	NA
ZR_5734	ZR	NA	1988	Masatomi, H.	Nesting habitats of the Japanese crane in eastern Hokkaido.	NA
ZR_5735	ZR	NA	2001	Mascara, Rosario	[The avifauna of Maroglio river valley (central-southern Sicily).]	NA
ZR_15108	ZR	NA	1986	Mason, R.	Badgers - alive and well, and living in Gower - at present.	NA
ZR_15117	ZR	NA	1982	Massey, A.	Ecology of house mouse populations confined by highways.	NA
ZR_5746	ZR	NA	1994	Massey, Barbara W.; Evans, Michael U.	An eight-year census of birds of Vallecito Creek, Anza-Borrego Desert, California.	NA
ZR_15132	ZR	NA	2005	Matsina, A. I.	The estimation and prediction of killed raptors by electrocutions on the power lines in the Nizhniy Novgorod District (forest and forest-steppe zones of the center of the European part of Russia).	NA
ZR_5801	ZR	NA	1989	Maxwell, J.	Sand martins nesting in artificially protected holes.	NA
ZR_5802	ZR	NA	1989	Maxwell, J.	Unusual nest sites of sand martins... and dipper.	NA
ZR_5820	ZR	NA	1989	Mazzotti, F. J.	Factors affecting the nesting success of the American crocodile, Crocodylus acutus, in Florida Bay.	NA
ZR_15173	ZR	NA	1998	McCarthy, J. H.; Scruton, D. A.; Green, J. M.; Clarke, K. D.	The effect of logging and road construction on brook trout movement in the Copper Lake watershed, Newfoundland, Canada.	NA
ZR_5851	ZR	NA	1993	McCulloch, Ellen	Counting sacred kingfishers.	NA
ZR_15192	ZR	NA	1991	McDonald, Michael G.	Moose movement and mortality associated with the Glenn Highway expansion, Anchorage Alaska.	NA
ZR_15199	ZR	NA	1990	McDougal, L. A.; Vaughan, M. R.; Bromley, P. T.	Wild turkey and road relationships on a Virginia national forest.	NA
WOS_20158	WOS	10.2307/2403836	1988	MCLELLAN, BN; SHACKLETON, DM	GRIZZLY BEARS AND RESOURCE-EXTRACTION INDUSTRIES - EFFECTS OF ROADS ON BEHAVIOR, HABITAT USE AND DEMOGRAPHY	Journal of Applied Ecology
ZR_15251	ZR	NA	1988	Mech, L. D.; Fritts, S. H.; Radde, G. L.; Paul, W. J.	Wolf distribution and road density in Minnesota.	NA
WOS_20235	WOS	NA	1989	MEDIN, DE; CLARY, WP	SMALL MAMMAL POPULATIONS IN A GRAZED AND UNGRAZED RIPARIAN HABITAT IN NEVADA	Usda Forest Service Intermountain Research Station Research Paper
WOS_20234	WOS	NA	1990	MEDIN, DE; CLARY, WP	BIRD AND SMALL MAMMAL POPULATIONS IN A GRAZED AND UNGRAZED RIPARIAN HABITAT IN IDAHO	Usda Forest Service Intermountain Research Station Research Paper
ZR_15260	ZR	NA	2005	Medzhidov, R. A.; Pestov, M. V.; Novgorod, N.; Saltykov, A. V.	Birds of prey and powerlines - results of project in the Republic of Kalmykia, Russia.	NA
WOS_20264	WOS	NA	1981	MEENTS, JK; ANDERSON, BW; OHMART, RD	VEGETATION CHARACTERISTICS ASSOCIATED WITH ABERT TOWHEE NUMBERS IN RIPARIAN HABITATS	Auk
ZR_15269	ZR	NA	1989	Meinig, H.	Experience and problems with a toad tunnel system in the Mittelgebirge region of West Germany.	NA
WOS_20439	WOS	10.2193/0022-541X(2005)069<0430:SHUAHA>2.0.CO;2	2005	Menzel, J. M.; Ford, W. M.; Menzel, M. A.; Carter, T. C.; Gardner, J. E.; Garner, J. D.; Hofmann, J. E.	Summer habitat use and home-range analysis of the endangered Indiana bat	Journal of Wildlife Management
ZR_15302	ZR	NA	2000	Merrill, Samuel B.	Road densities and gray wolf, Canis lupus, habitat suitability: an exception.	NA
ZR_5992	ZR	NA	2004	Merritt, Bronwyn; Wallis, Robert	Are wide revegetated riparian strips better for birds and frogs than narrow ones?	NA
ZR_6005	ZR	NA	2001	Meschini, Angelo	[Habitat, environmental preference and niche of Burhinus oedicnemus and Charadrius dubius in some fluvial systems of central Italy.]	NA
ZR_6010	ZR	NA	1995	Metrailler, Sebastien; Ducotterd, Jean-Marc	[Observation of egg laying of Chelonia mydas on a bank of the river Maroni.]	NA
ZR_6011	ZR	NA	2003	Metzner, Juergen; von Hessberg, Andreas; Voelkl, Wolfgang	New primary habitats through river restoration? - Development of select bird species after re-introduction of dynamic processes along Main River.	NA
ZR_15318	ZR	NA	1996	Meyburg, Bernd-Ulrich; Manowsky, Otto; Meyburg, Christiane	The osprey in Germany: its adaptation to environments altered by man.	NA
ZR_6025	ZR	NA	1996	Meyer, Raymond A.; Thompson, Bruce C.	Bird species detection on transects in linear riparian habitats of Rio Grande Valley agricultural drainage channels.	NA
ZR_15332	ZR	NA	1978	Michael, E. D.	Effects of highway construction on game animals.	NA
ZR_15331	ZR	10.2307/1367805	1978	Michael, E. D.; Taylor, C.	Use of interstate highway cuts as starling nesting sites.	NA
ZR_6043	ZR	NA	1989	Michelot, J.-L.	Succession ecologiques primaires et avifaune nicheuse sur les plateformes du Rhone amenage.	NA
ZR_15355	ZR	NA	1974	Mierau, G. W.	Lead poisoning in roadside deer mice.	NA
ZR_15354	ZR	10.1016/0013-9327(75)90072-5	1975	Mierau, G. W.; Favara, B. E.	Lead poisoning in roadside populations of deer mice.	NA
ZR_6060	ZR	NA	1988	Mierow, D.	Birds of the central Himalayas: an ecological approach.	NA
ZR_15371	ZR	NA	1974	Miller, F. L.	A new era - are migratory barren-ground caribou and petroleum exploitation compatible.	NA
ZR_15372	ZR	NA	1983	Miller, F. L.	Some physical characteristics of caribou spring migration crossing sites on the Dempster Highway, Yukon Territory.	NA
ZR_6089	ZR	NA	2000	Miller, James R.; Wiens, John A.; Thompson Hobbs, N.	How does urbanization affect bird communities in riparian habitats? an approach and preliminary assessment.	NA
ZR_6124	ZR	NA	1993	Minser, William G.	The relationship of wood duck brood density to river habitat factors.	NA
ZR_15409	ZR	NA	1995	Minton, Clive	Unusual feeding mode for eastern curlew.	NA
ZR_6140	ZR	NA	1997	Mitani, Masazumi; Ikeguchi, Hitoshi	Riverside vegetation and gene flow among the Japanese macaques' populations: a speculation from case studies in the Hyogo prefecture.	NA
ZR_15422	ZR	NA	2005	Mitchell, Joseph C.	Mortality of larval spotted salamanders (Ambystoma maculatum) in a central Virginia road rut puddle.	NA
ZR_6143	ZR	NA	2000	Mitchell, Joseph C.; Bellows, A. Scott; Georgel, C. Todd	Notes on amphibians and reptiles in riparian and upland habitats on Fort A. P. Hill, Virginia.	NA
ZR_6178	ZR	NA	1996	Monadjem, A.; Owen-Smith, N.; Kemp, A. C.	Broad-scale distribution patterns of piscivorous birds along a South African subtropical river during the dry season.	NA
ZR_6180	ZR	10.1111/j.1365-2028.1996.tb00597.x	1996	Monadjem, Ara	Habitat associations of birds along the Sabie River, South Africa.	NA
ZR_6192	ZR	NA	1997	Monig, Rainer	[Nestling mortality of the dipper (Cinclus cinclus) along the river Wupper.]	NA
ZR_15500	ZR	NA	1979	Morash, J. M.; Michael, E. D.	Effect of mowing interstate rights-of-way upon songbird use.	NA
ZR_6259	ZR	NA	1992	Morris, A. J.	A study of the riparian birds of the River Don in Sheffield.	NA
WOS_21342	WOS	NA	1988	MORRIS, PA; MORRIS, MJ	DISTRIBUTION AND ABUNDANCE OF HEDGEHOGS (ERINACEUS-EUROPAEUS) ON NEW-ZEALAND ROADS	New Zealand Journal of Zoology
ZR_6264	ZR	10.2307/3671875	1992	Morrison, J. L.	Persistence of the meadow jumping mouse, Zapus hudsonius luteus, in New Mexico.	NA
ZR_6271	ZR	NA	1998	Mosansky, Ladislav	Breeding bird communities of Poprad River (part Stara Lubovna - Orlov).	NA
ZR_6272	ZR	NA	2000	Mosansky, Ladislav	Breeding bird communities of Pieniny (part habitats along Dunajec River).	NA
ZR_15550	ZR	NA	1990	Moses, L. E.; Rabinowitz, D.	Estimating (relative) species abundance from route counts of the Breeding Bird Survey.	NA
ZR_6276	ZR	NA	1996	Moskat, C.; Fuisz, T. I.; Park, J. Y.	Comparison of habitat selection characteristics of the robin (Erithacus rubecula) and the dunnock (Prunella modularis) in riparian forests along the River Danube.	NA
ZR_6283	ZR	NA	1985	Motroni, R. S.	Seasonal variation of bird numbers in a riparian forest, Sacramento Valley, California.	NA
ZR_15563	ZR	NA	1988	Moynihan, M.	The opportunism of the Abyssinian roller (Coracias abyssinica) in Senegal.	NA
ZR_6302	ZR	NA	2010	Mueller, Mathis; Akeret, Eugen; Leuzinger, Hans	[Ther avifauna in the Seebach valley and its changes since the habitat improvements of 2002.]	NA
ZR_15575	ZR	NA	1999	Mueri, Helen	Changes in the dispersal of roe deer in a fragmented landscape.	NA
ZR_15580	ZR	NA	1969	Mukherjee, R. P.	A field study on the behaviour of two road size groups of Rhesus macaque [Macaco mulatto (Zimmermann)] in northern Uttar Pradesh.	NA
ZR_15583	ZR	NA	1999	Mulhauser, Blaise; Roulet, Stephan	A sand martin Riparia riparia colony in a retaining wall at Areuse (Neuchatel, Switzerland).	NA
ZR_6328	ZR	NA	1994	Mundy, P. J.; Couto, J. T.; Feather, P. J.	Surveys of the carmine bee-eater on the Lower Zambezi River in Zimbabwe.	NA
ZR_6345	ZR	10.1071/MU9960285	1996	Muranyi, Monica; Baverstock, Peter R.	The distribution and habitat preference of the bush-hen Amaurornis olivacea in north-eastern New South Wales.	NA
WOS_21662	WOS	10.2307/3809118	1995	MURRAY, NL; STAUFFER, DF	NONGAME BIRD USE OF HABITAT IN CENTRAL APPALACHIAN RIPARIAN FORESTS	Journal of Wildlife Management
ZR_15612	ZR	NA	1988	Murray-Bligh, J.; Cooke, J.	Fishburn railway pond - the beginning of a new wildlife habitat.	NA
ZR_15614	ZR	NA	1987	Muselet, D.	Etudes du comportement de l'avifaune lors de la traversee de voies autoroutieres, autoroute A10 au Nord d'Orleans, Loiret.	NA
ZR_15619	ZR	NA	1996	Mutz, Thomas; Donth, Stefan	Studies about ecology and population structure of the sand lizard (Lacerta agilis) at a railway embankment in Munsterland, Western Germany.	NA
ZR_15622	ZR	NA	1990	Muzzi, Peter D.; Bisset, Alan R.	Effectiveness of ultrasonic wildlife warning devices to reduce moose fatalities along railway corridors.	NA
ZR_15624	ZR	NA	1991	Myers, C. W.	Distribution of the dendrobatid frog Colostethus chocoensis and description of a related species occurring macrosympatrically.	NA
ZR_6370	ZR	NA	1993	Myers, Stephen J.	Mountain chickadees nest in desert riparian forest.	NA
ZR_6385	ZR	10.2307/1310784	1988	Naiman, R. J.; Johnston, C. A.; Kelley, J. C.	Alteration of North American streams by beaver. The structure and dynamics of streams are changing as beaver recolonize their historic habitat.	NA
ZR_15656	ZR	NA	1983	Nankinov, D. N.; Todorov, N. M.	Bird casualties on highways.	NA
ZR_15696	ZR	NA	1989	Nelson, D. R.; Kimmel, R. O.; Frydendall, M. J.	Evaluation of roadsides and managed grasslands as brood habitat for ring-necked pheasants and gray partridge.	NA
ZR_15697	ZR	NA	1976	Nelson, M. W.; Nelson, P.	Power lines and birds of prey. Idaho Wildl.	NA
ZR_15699	ZR	NA	1991	Nelson, W.	The yellow rails of McGregor Marsh.	NA
ZR_6463	ZR	NA	1987	Nemec, F.	Interesante Plazierung des Nestes von Zwergmaus (Micromys minutus).	NA
ZR_15715	ZR	NA	1987	Newbey, B. J.; Newbey, K. R.	Bird dynamics of Foster Road Reserve, near Ongerup Western Australia.	NA
ZR_15721	ZR	NA	1987	Newman, O. M. G.	Deterioration of Pottery Road as a bird habitat?	NA
ZR_15724	ZR	NA	1983	Ney, J. J.; van Hassel, J. H.	Sources of variability in accumulation of heavy metals by fishes in a roadside stream.	NA
ZR_15735	ZR	NA	1978	Nicholson, L.	The effects of roads on desert tortoise populations.	NA
ZR_15736	ZR	NA	2000	Nicola, Nancy C.; Lovich, Jeffrey E.	Preliminary observations of the behavior of male, flat-tailed horned lizards before and after an off-highway vehicle race in California.	NA
ZR_15750	ZR	NA	1995	Niemi, Gerald; Lima, Ann; Hanowski, JoAnn; Pfannmuller, Lee	Recent trends of breeding birds in Minnesota and Minnesota forested regions 1966-1993.	NA
ZR_15781	ZR	10.2193/0091-7648(2006)34[870:RTJEAA]2.0.CO;2	2006	Noel, Lynn E.; Parker, Keith R.; Cronin, Matthew A.	Response to Joly et al. (2006), a reevaluation of caribou distribution near an oilfield road on Alaska's north slope.	NA
ZR_15814	ZR	NA	1986	Novak, P.	Possible factors influencing the distribution, status and abundance of the loggerhead shrike (Lanius ludovicianus) in New York State.	NA
ZR_6571	ZR	NA	2001	Nunes, A. C.; Auffray, J.-C.; Mathias, M. L.	Developmental instability in a riparian population of the Algerian mouse (Mus spretus) associated with a heavy metal-polluted area in central Portugal.	NA
ZR_15823	ZR	NA	2002	Nyenhuis, H.	Road traffic mortality of roe deer (Capreolus capreolus L.) associated with landscape, weather and behaviour.	NA
ZR_6590	ZR	NA	1992	Obermeyer, B.	Effect of logging on breeding bird diversity in riparian forests on Fall River Wildlife Area.	NA
ZR_15839	ZR	10.2307/3799786	1971	Oetting, R. B.; Cassel, J. F.	Waterfowl nesting on interstate highway right-of-way in North Dakota.	NA
WOS_22632	WOS	10.2307/3799786	1971	OETTING, RB; CASSEL, JF	WATERFOWL NESTING ON INTERSTATE HIGHWAY RIGHT-OF-WAY IN NORTH-DAKOTA	Journal of Wildlife Management
ZR_6621	ZR	NA	1994	Ohmart, Robert D.	The effects of human-induced changes on the avifauna of western riparian habitats.	NA
ZR_6626	ZR	NA	2010	Ojika, Tomi	Mammals in the riparian forests of the Yahagi River.	NA
ZR_15879	ZR	NA	1981	Olendorff, R. R.; Miller, A. D.; Lehman, R. N.	Suggested practices for raptor protection on power lines. The state of the art in 1981.	NA
ZR_6641	ZR	NA	1973	Olioso, G.	Les oiseaux de la ripisylve du Calavon.	NA
ZR_6665	ZR	NA	2004	Olson, Kirk; Zahler, Peter; Odonkhuu, Daria	Connectivity, corridors and stepping stones: conservation implications of roe deer distribution on the Eastern Steppe.	NA
ZR_6667	ZR	NA	1989	Olson, T. E.; Gray, M. V.	Characteristics of least Bell's vireo nest sites along the Santa Ynez River.	NA
ZR_6668	ZR	NA	1988	Olson, T. E.; Knopf, F. L.	Patterns of relative diversity within riparian small mammal communities, Platte River watershed, Colorado.	NA
ZR_15892	ZR	NA	1993	Olson, Thomas E.; Jones, Karen; McCullough, David; Tuegel, Martin	Effectiveness of mitigation for reducing impacts to desert tortoise along an interstate pipeline route.	NA
ZR_15900	ZR	NA	1999	Oniki, Yoshika; Willis, Edwin O.	Single nestling care and male abandoning in variable antshrikes Thamnophilus caerulescens, with notes on excess roadside clearing.	NA
ZR_15903	ZR	NA	1997	Ontiveros, Diego	Habitat loss of Bonelli's eagle in the province of Granada.	NA
ZR_6679	ZR	NA	1988	Oparina, O. S.; Varshavskaya, R. N.; Matrosova, S. N.	[Siphonapteran fleas of the brown rat in the lower stretches of the Volga River.]	NA
ZR_15933	ZR	NA	1987	Orman, S.; Swift, B.	Early nesting of a Virginia rail in New York.	NA
ZR_6688	ZR	NA	1990	Ormerod, S.	Riverine birds and land use in Nepal.	NA
ZR_15954	ZR	NA	1999	Osorno-Munoz, Mariela	Edge effect and fragmentation in a population of Eleutherodactylus viejas (Amphibia: Anura: Leptodactylidae) in forests divided by electrical transmission lines.	NA
ZR_6711	ZR	NA	1994	Ostapenko, V. A.; Gurov, D. N.	The composition and biotopic distribution of near-water birds in south-east Viet-Nam.	NA
ZR_15955	ZR	NA	1993	Ostbye, Eivind; Engh, Carl-Erik; Lien, Leif; Mysterud, Ivar; Ostbye, Kjartan; Pedersen, Oyvind; Semb-Johansson, Arne	Regional distribution of lemmings (Lemmus lemmus) during cyclic highs in the Hallingdalen Valley, southern Norway, 1966-1985.	NA
ZR_6720	ZR	NA	1998	Otahal, Christopher D.	Fall stopover behavior of willow flycatchers using a riparian corridor in central California.	NA
ZR_15960	ZR	NA	2004	Ott, Juergen	Control of an amphibian protection facility's functional state at the L 500 (Karlstalstrasse) near Trippstadt/Palatinate.	NA
ZR_15962	ZR	NA	2009	Ottburg, F. G. W. A.; van Bitterswijk, H.	[The way of the toad! The toad population of Hoekelum, Horapark and ENKA territories; a study on population size during the toad migration of 2007 and 2008.]	NA
ZR_15963	ZR	NA	2002	Otto, Christoph	[Excerpts from a study on the migratory corridors of amphibians at road crossings in the city of Dessau.]	NA
ZR_15975	ZR	NA	2015	Owen, Jacob D.; Meik, Jesse M.; Schwertner, T. Wayne	Preliminary Nocturnal Road Survey of Snakes in Northeastern Swaziland: Effects of Agriculture on Relative Abundance.	NA
ZR_15979	ZR	10.2307/2402004	1974	Oxley, D. J.; Fenton, M. B.; Carmody, G. R.	The effects of roads on populations of small mammals.	NA
ZR_6767	ZR	NA	1994	Pailley, Patrice; Beaudoin, Jean-Claude	Trois annees de suivi d'une colonie mixte de sternes pierregarins Sterna hirundo de sternes naines Sterna albifrons et de petits gravelots Charadrius dubius en Loire angevine.	NA
ZR_6774	ZR	NA	2000	Palacio-Nunez, Jorge; Clemente-Sanchez, Fernando; Herrera-Haro, Jose G.; Ortega-Escobar, Manuel; Garcia-Bojalil, Carlos M.; Larque-Saavedra, Alfonso	Waterfowl and riparian birds in the Media Luna ecosystem, Rioverde, San Luis Potosi, Mexico.	NA
ZR_6777	ZR	NA	1998	Palazon, S.; Ruiz-Olmo, J.	A preliminary study of the behaviour of the European mink Mustela lutreola in Spain, by means of radiotracking.	NA
ZR_16012	ZR	NA	2012	Panasci, Theresa	Roadside hawk.	NA
ZR_6801	ZR	10.1023/A:1011408703336	2001	Panetta, F. D.; Sparkes, E. C.	Reinvasion of a riparian forest community by an animal-dispersed tree weed following control measures.	NA
ZR_16028	ZR	NA	1994	Paralkar, V. K.; Chaturvedi, N. C.	An unusual roosting site of the marsh harrier Circus aeruginosus (Linn.).	NA
ZR_16041	ZR	NA	1986	Parrat, S.-P.	Nid du chocard a bec jaune, Pyrrhocorax graculus, dans un poteau metallique.	NA
ZR_16050	ZR	NA	1992	Pascasio Lopez, Jose Manuel	[Provisional report of the mortality of vertebrates on the roads of Cartagena, September 1991.]	NA
ZR_6843	ZR	NA	1999	Paton, Penny A.; Pedler, Janet A.	A survey of the avifauna of the River Torrens Linear Park, Adelaide.	NA
ZR_16070	ZR	NA	1994	Patterson, Rich	Deer, oh dear!	NA
ZR_16074	ZR	NA	1987	Paukert, J.	Le plomb des gaz d'echappement: impact relativement meconnu sur le lievre.	NA
WOS_23582	WOS	NA	2000	Pauley, T. K.; Mitchell, J. C.; Buech, R. R.; Moriarty, J. J.	Ecology and management of riparian habitats far amphibians and reptiles	NA
ZR_16088	ZR	NA	1992	Pearce, G.	A study of wild and released barn owls in East Devon, 1980-1992.	NA
ZR_16113	ZR	NA	2002	Pennell, Jeffrey; Salmon, Michael; Witherington, Blair; Broadwell, Ann L.	Effect of filtered roadway lighting on nesting by loggerhead sea turtles (Caretta caretta).	NA
ZR_6940	ZR	10.1577/1548-8659(1983)3<204:FPANAR>2.0.CO;2	1983	Pennington, C. H.; Baker, J. A.; Potter, M. E.	Fish populations along natural and revetted banks on the lower Mississippi.	NA
ZR_6946	ZR	NA	1986	Penry, E. H.	Yellow-bellied bulbul on the upper reaches of the Motloutse River.	NA
ZR_16123	ZR	NA	1996	Pereira, Ana Cecilia; Medeiros, Fatima Melo	Some data about the feeding behaviour of buzzard Buteo buteo rothchildi [rothschildi] in Azores.	NA
ZR_6995	ZR	NA	2010	Pervushina, E. M.	Spatial and biotopic distribution of bats (Chiroptera, Vespertilionidae) in the southern forest zone of the Middle Urals.	NA
ZR_16154	ZR	NA	2011	Pestov, Mark V.; Pestov, Georgiy M.	The influence of Astrakhan gas condensate field infrastructure on the population of vertebrate animals in South of Astrakhan oblast.	NA
WOS_23946	WOS	10.2193/0022-541X(2005)069<0409:SWHSIA>2.0.CO;2	2005	Peters, K. A.; Lancia, R. A.; Gerwin, J. A.	Swainson's warbler habitat selection in a managed bottomland hardwood forest	Journal of Wildlife Management
WOS_23986	WOS	NA	1987	PETERSON, RP	A NEW BLUEBIRD NESTING STRUCTURE FOR HIGHWAY RIGHTS-OF-WAY	Wildlife Society Bulletin
ZR_7015	ZR	NA	1987	Petit, L. J.; Fleming, W. J.; Petit, K. E.; Petit, D. R.	Nest box use by prothonotary warblers (Protonotaria citrea) in riverine habitat.	NA
ZR_16176	ZR	NA	2007	Pfalzer, Guido	A new amphibian protection device at L 382 near Otterberg/Kaiserslautern - preliminary investigations and control of success.	NA
ZR_7037	ZR	NA	1993	Philippona, Jules	[Meadow birds along the Oka River in Russia.]	NA
ZR_16181	ZR	NA	1998	Phillips, Marcus; Phillips, Susan	Toads on roads, in car parks and down drains.	NA
ZR_7085	ZR	NA	1998	Pintar, Manfred; Spolwind, Robert	Fish and amphibian coenoses in backwaters of riparian forests of the river Danube nearby Vienna.	NA
ZR_16235	ZR	NA	2003	Plumb, Regan E.; Gordon, Kelly M.; Anderson, Stanley H.	Pronghorn use of a wildlife underpass.	NA
ZR_7127	ZR	NA	2008	Plummer, Michael V.; Mills, Nathan E.	Structure of an urban population of softshell turtles (Apalone spinifera) before and after severe stream alteration.	NA
ZR_16243	ZR	NA	1989	Podloucky, R.	Protection of amphibians on roads - examples and experiences from Lower Saxony.	NA
ZR_16254	ZR	NA	1993	Polaco, Oscar J.; Guzman, Ana F.	[Annual mortality of mammals on a highway south of Nuevo Leon.]	NA
ZR_7161	ZR	NA	1989	Pollard, C. J. W.	Observations at an African skimmer colony at the Victoria Falls.	NA
ZR_7165	ZR	NA	1995	Pollock, Michael M.; Naiman, Robert J.; Erickson, Heather E.; Johnston, Carol A.; Pastor, John; Pinay, Gilles	Beaver as engineers: influences on biotic and abiotic characteristics of drainage basins.	NA
ZR_16265	ZR	NA	1978	Polunin, N.	Gulls around a Swiss autoroute.	NA
ZR_7174	ZR	NA	1998	Ponimatko, A. O.	Bat hibernacula on the territory of Nizhny Novgorod.	NA
ZR_16273	ZR	NA	2000	Pons, Pere	Height of the road embankment affects probability of traffic collision by birds.	NA
ZR_7175	ZR	NA	1987	Pont, B.	Comparaison de l'avifaune nicheuse d'une ripisylve et de peupleraies de la moyenne vallee du Rhone (Ile de la Platiere).	NA
ZR_16293	ZR	NA	1974	Porter, T. R.; Rosenberg, D. M.; McGowan, D. K.	Winter studies of the effects of a highway crossing on the fish and benthos of the Martin River, N.W.T.	NA
ZR_7191	ZR	NA	1994	Portlock, William S.	Rappahannock River bald eagles.	NA
ZR_7194	ZR	NA	1978	Possardt, E. E.; Dodge, W. E.	Stream channelization impacts on songbirds and small mammals in Vermont.	NA
ZR_7195	ZR	NA	2000	Potapov, Eugene; Utekhina, Irina; McGrady, Michael J.	Steller's sea eagle in Magadan District and in the north of Khabarovsk District.	NA
ZR_7196	ZR	NA	1996	Poteet, Micah L.; Thill, Ronald E.; Whiting, R. Montague; Rayburn, R. Lee	Deer use of riparian zones and adjacent pine plantations in Texas.	NA
ZR_16324	ZR	NA	2004	Pranty, Bill; Robinson, Donald J.; Barnwell, Mary; Black, Clay; Tracey, Ken	Discovery and habitat use of black rails along the central Florida Gulf coast.	NA
ZR_7240	ZR	NA	1995	Prigioni, Claudio; De Marinis, Anna Maria	Diet of the polecat Mustela putorius L. in riverine habitats (northern Italy).	NA
ZR_16386	ZR	NA	1989	Puky, M.	The MO Project - a hope for Hungarian amphibians.	NA
ZR_16388	ZR	NA	1992	Purcell, P. W.; Hynes, M. J.; Fairley, J. S.	Lead levels in Irish small rodents (Apodemus sylvaticus and Clethrionomys glareolus) from around a tailings pond and along motorway verges.	NA
ZR_16398	ZR	NA	2008	Puzovic, Slobodan	Breeding of birds on high voltage power line in Serbia.	NA
ZR_7284	ZR	NA	1991	Qishan, Wang	Wintering ecology of oriental white storks in the lower reaches of the Changjiang River, central China.	NA
ZR_16409	ZR	NA	1974	Quarles, H. D.; Hanawalt, R. B.; Odum, W. E.	Lead in small mammals, plants and soil at varying distances from a highway.	NA
WOS_24930	WOS	10.2193/0022-541X(2006)70[859:VUOARR]2.0.CO;2	2006	Queheillalt, Dianna M.; Morrison, Michael L.	Vertebrate use of a restored riparian site: A case study on the central coast of California	Journal of Wildlife Management
ZR_16413	ZR	NA	1986	Quesnel, V. C.	Why do nightjars sit on the road at night?	NA
ZR_16414	ZR	NA	1990	Quesnel, V. C.	Observations on the pauraque nightjar, Nyctidromus albicollis (Gmelin), on the roads at night.	NA
ZR_7328	ZR	NA	1998	Racey, P. A.	The importance of the riparian environment as a habitat for British bats.	NA
ZR_16436	ZR	NA	1986	Raevel, P.	Concentration ponctuelle de rapaces nocturnes sur un lieu de passage de crapauds communs (Bufo bufo).	NA
ZR_7342	ZR	NA	2000	Rafanomezantsoa, Simon A.	Behavior and range movements during the post-fledging dependence period of the Madagascar fish-eagle Haliaeetus vociferoides.	NA
ZR_16447	ZR	NA	1983	Rajala, P.	Population trends in the mountain hare in northern Finland as related to the 1979-81 roadside census.	NA
ZR_7361	ZR	NA	1989	Ramalhinho, M. G.; Tavares, P.	Distribution and ecology of Galemys pyrenaicus (Geoffroy, 1811) (Insectivora, Talpidae) in the 'Parque Natural de Montezinho'.	NA
ZR_16475	ZR	NA	1975	Rankin, P. R.	Exploitation of a woodpile in northern Queensland by a community of amphibians and reptiles.	NA
ZR_7391	ZR	NA	1999	Rapoport, Leonid P.	The influence of the irrigation on the left bank Sir-Darya River on the wild mammals and the epidemiologycal [epidemiological] situation in the region.	NA
ZR_7392	ZR	NA	1987	Rappole, J. H.; Ballard, K.	Postbreeding movements of selected species of birds in Athens, Georgia.	NA
ZR_16491	ZR	NA	1983	Ratcliffe, J.	Why did the toad cross the road?	NA
ZR_7399	ZR	10.2307/3671880	1992	Rathbun, G. B.; Siepel, N.; Holland, D.	Nesting behavior and movements of western pond turtles, Clemmys marmorata.	NA
ZR_16497	ZR	NA	1979	Raty, M.	Effect of highway traffic on tetraonid densities.	NA
ZR_16502	ZR	NA	2006	Ray, James Earl; Preston, Donald; McCallum, Malcolm L.	Bufo nebulifer (coastal plains toad). Urban road mortality.	NA
ZR_16506	ZR	NA	1983	Razhdestvenskaya, G. S.	[The species composition and numbers of mouse-type rodents which live near motorways and in the Berezinsk Reserve.]	NA
ZR_16515	ZR	NA	1989	Reading, C. J.	Opportunistic predation of common toads Bufo bufo at a drift fence in southern England.	NA
ZR_7424	ZR	NA	1996	Reaser, Jamie K.	Spotted frog: catalyst for sharing common ground in the riparian ecosystems of Nevada's range landscape.	NA
ZR_7435	ZR	NA	1997	Recker, Wilhelm	The food ecology of the Elbe beaver between Upper Havel, Finow and Welse river, with regard to his influence on tree species. The ecological niche of the Elbe beaver in manmade landscape.	NA
ZR_16530	ZR	10.2307/3807943	1981	Reed, D. F.	Mule deer behavior at a highway underpass exit.	NA
ZR_16529	ZR	10.2307/3800673	1979	Reed, D. F.; Kincaid, K. R.; Beck, T. D. I.	Migratory mule deer fall from highway cliffs.	NA
ZR_7450	ZR	NA	1997	Reese, Devin A.; Welsh, Hartwell H.	Use of terrestrial habitat by western pond turtles, Clemmys marmorata: implications for management.	NA
ZR_16543	ZR	NA	1989	Reh, W.	Investigations into the influence of roads on genetic structure of populations of the common frog Rana temporaria.	NA
ZR_16550	ZR	NA	1997	Reichholf, Josef H.	Population dynamics of the red fox (Vulpes vulpes) and road casualities [casualties].	NA
ZR_16553	ZR	NA	2004	Reichholf, Josef H.	[Frequency of buzzards (Buteo buteo) in the first half of the year between Munich and Lindau.]	NA
ZR_16557	ZR	NA	1994	Reid, Frederic A.; Meanley, Brooke; Fredrickson, Leigh H.	King rail.	NA
ZR_16566	ZR	NA	1985	Reijnen, M. J. S. M.	Effects of road traffic on breeding birds.	NA
ZR_16567	ZR	NA	1986	Reijnen, M. J. S. M.	Effects of road traffic on breeding birds.	NA
ZR_16565	ZR	NA	1987	Reijnen, M. J. S. M.; Thissen, J. B. M.	Effects from road traffic on breeding bird populations in woodland.	NA
ZR_16564	ZR	NA	1987	Reijnen, M. J. S. M.; Thissen, J. B. M.; Bekker, G. J.	Effects of road traffic on woodland breeding birds.	NA
ZR_16574	ZR	NA	2006	Reijnen, Rien; Foppen, Ruud	Impact of road traffic on breeding bird populations.	NA
ZR_7480	ZR	NA	1994	Reinhold, Jeroen	[Mammals on the water's edge.]	NA
ZR_16597	ZR	NA	1980	Rekasi, J.	Cenological and ecological investigations on birds of roadside mulberry trees.	NA
ZR_16613	ZR	NA	1986	Rey, A.; Fleury, A.	La migration des batraciens au lac de Morgins (VS) et la menace du trafic routier.	NA
ZR_16623	ZR	NA	2003	Rhim, Shin-Jae; Hur, Wee-Haeng; Park, Young-Su; Choi, Seo-Youn; Lee, Chang-Bae; Piao, Renzhu; Lee, Woo-Shin	Differences in mammal's abundance in different distance areas from road.	NA
ZR_16637	ZR	NA	1999	Ribic, Christine A.	Rails in Wisconsin, with a focus on Sora & Virginia rail.	NA
ZR_7536	ZR	NA	1981	Rice, J.; Ohmart, R. D.; Anderson, B.	Bird community use of riparian habitats: the importance of temporal scale in interpreting discriminant analysis.	NA
WOS_25654	WOS	10.2307/1937499	1983	RICE, J.; OHMART, RD; ANDERSON, BW	TURNOVERS IN SPECIES COMPOSITION OF AVIAN COMMUNITIES IN CONTIGUOUS RIPARIAN HABITATS	Ecology
ZR_16644	ZR	NA	2008	Richard, Jason	Observations of road-kill of the wallum froglet (Crinia tinnula) on the Queensland sunshine coast.	NA
ZR_16647	ZR	NA	1985	Richardson, B. A.	The impact of forest road construction on the benthic invertebrate and fish fauna of a coastal stream in southern New South Wales.	NA
ZR_16650	ZR	NA	1997	Richardson, J. H.; Shore, R. F.; Treweek, J. R.; Larkin, S. B. C.	Are major roads a barrier to small mammals?	NA
ZR_7562	ZR	NA	1988	Riddell, I. C.	Long-toed plover in unusual habitat.	NA
ZR_7563	ZR	NA	2002	Riddell, I. C.	Observations on a riparian bird party.	NA
ZR_7564	ZR	NA	1987	Ridding, M. O.; Smith, H. D.	Post-release monitoring of the second group of otters.	NA
ZR_16672	ZR	NA	2000	Riedel, Walter	[Muridae living on track sites in railway stations in Stuttgart, Germany.]	NA
ZR_7588	ZR	NA	1996	Rieger, Ingo	[Activity of Daubenton's bats Myotis daubentonii over the River Rhine.]	NA
ZR_7597	ZR	NA	2009	Rigaux, Pierre; Charruau, Pauline	[Elements in the study of the south western water vole (Arvicola sapidus) and distribution factors. Example of the Sioule basin (Allier, Puy-de-Dome, Creuse).]	NA
ZR_16682	ZR	NA	1997	Righetti, Antonio	[Safe passages for wild animals. Enrichment of the Swiss motorway network with wild animals.]	NA
ZR_16684	ZR	NA	1987	Riisik, P.	A raven's nest on top of a high-voltage pylon.	NA
ZR_7608	ZR	10.1577/1548-8675(1988)008<0240:GEOSHA>2.3.CO;2	1988	Rinne, J. N.	Grazing effects on stream habitat and fishes: research design considerations.	NA
ZR_16699	ZR	NA	1998	Ritchie, Robert J.; Doyle, Terry J.; Wright, John M.	Peregrine falcons (Falco peregrinus) nest in a quarry and on highway cutbanks in Alaska.	NA
ZR_16712	ZR	NA	2009	Robert, M.; Jobin, B.; Robillard, L.; Shaffer, F.	Yellow rail distribution and abundance in southern James Bay, Quebec.	NA
ZR_16723	ZR	NA	1992	Robertson, P.	Levaillant's cisticola: habitat.	NA
ZR_16728	ZR	NA	1983	Robinson, P. I. C.	Effect of lead on small mammals inhabiting heavy traffic road verges.	NA
ZR_16729	ZR	NA	1985	Robinson, P. I. C.	Effect of lead on small mammals inhabiting heavy traffic road verges.	NA
ZR_7672	ZR	NA	1995	Roche, Jean; d'Andurain, Peyo	Ecologie du cincle plongeur Cinclus cinclus et du chevalier guignette Tringa hypoleucos dans les gorges de la Loire et de l'Allier.	NA
ZR_16750	ZR	NA	1987	Rodier, J.-L.	Faucon hobereau et pylones electriques.	NA
ZR_16751	ZR	NA	1996	Rodrigues, David J. C.; Fabiao, Antonio M. D.; Tenreiro, Paulo J. Q.	The value of refuge areas for rail ecology and management: the moorhen Gallinula chloropus example.	NA
ZR_16757	ZR	NA	2006	Rodriguez, Beneharo; Siverio, Manuel	Density and breeding habitat characteristics of an insular population of Barbary falcon Falco peregrinus pelegrinoides (El Hierro, Canary Islands).	NA
ZR_7700	ZR	NA	1990	Rodriguez-Estrella, R.; Brown, B. T.	Density and habitat use of raptors along the Rio Bavispe and Rio Yaqui, Sonora, Mexico.	NA
ZR_7720	ZR	NA	1996	Rohde, Jurgen	[The avifauna of the Ise in the Gifhorn district. Results following an ecological revitalization project.]	NA
ZR_16789	ZR	NA	1997	Roig-Soles, Jorge; Navazo-Lopez, Victor	A five-year Spanish research project on bird electrocution and collision with electric lines.	NA
WOS_26306	WOS	NA	1982	ROSENBERG, KV; OHMART, RD; ANDERSON, BW	COMMUNITY ORGANIZATION OF RIPARIAN BREEDING BIRDS - RESPONSE TO AN ANNUAL RESOURCE PEAK	Auk
WOS_26307	WOS	NA	1987	ROSENBERG, KV; TERRILL, SB; ROSENBERG, GH	VALUE OF SUBURBAN HABITATS TO DESERT RIPARIAN BIRDS	Wilson Bulletin
ZR_7775	ZR	NA	1996	Rosoux, Rene; Libois, Roland M.	Use of day resting places by the European otter (Lutra lutra) in the Marais Poitevin (France). A radiotracking study.	NA
ZR_16838	ZR	NA	1992	Rossell, C. Reed; DiTomasso, Dean J.	Prairie warbler colonization of a right-of-way in Lewis County, New York.	NA
ZR_16843	ZR	NA	1995	Rotenberry, John T.; Knick, Steven T.	Evaluation of bias in roadside point count surveys of passerines in shrubsteppe and grassland habitats in southwestern Idaho.	NA
ZR_16848	ZR	NA	2011	Rouse, Jeremy D.; Willson, Robert J.; Black, Ron; Brooks, Ronald J.	Movement and spatial dispersion of Sistrurus catenatus and Heterodon platirhinos: implications for interactions with roads.	NA
WOS_26407	WOS	NA	2004	Rowland, M. M.; Wisdom, M. J.; Johnson, B. K.; Penninger, M. A.	Effects of roads on elk: Implications for management in forested ecosystems	Transactions of the Sixty-Ninth North American Wildlife and Natural Resources Conference
ZR_16865	ZR	NA	1983	Rozhdestvenskaya, A. S.	[Comparative characteristics of rodent populations living near a main highway and on a reserve.]	NA
ZR_16866	ZR	NA	1984	Rozhdestvenskaya, A. S.	[Numbers dynamics of murine rodents living near a motorway.]	NA
ZR_7830	ZR	10.2307/3672055	1990	Rudolph, D. C.; Dickson, J. G.	Streamside zone width and amphibian and reptile abundance.	NA
ZR_16876	ZR	NA	2006	Ruediger, William C.; Wall, Ken; Wall, Robin	Wildlife impacts and conservation solutions: large mammals. Effects of highways on elk (Cervus elaphus) habitat in the western United States and proposed mitigation approaches.	NA
WOS_26519	WOS	NA	1993	RUIZOLMO, J.; LOPEZMARTIN, JM	NOTE ON THE DIET OF THE COMMON GENET (GENETTA-GENETTA L) IN MEDITERRANEAN RIPARIAN HABITATS OF NE SPAIN	Mammalia
ZR_7853	ZR	NA	2006	Rupert, Corinna; Brush, Tim	Habitat use of breeding birds in riparian forest of the Lower Rio Grande Valley of Texas.	NA
ZR_16903	ZR	NA	1982	Russell, D.	The Dempster Highway and the Porcupine caribou herd.	NA
ZR_16904	ZR	NA	1983	Russell, D. E.; Martell, A. M.	The Dempster Highway and activity of the porcupine caribou herd.	NA
ZR_16912	ZR	NA	1986	Rusz, P. J.; Prince, H. H.; Rusz, R. D.; Dawson, G. A.	Bird collisions with transmission lines near a power plant cooling pond.	NA
ZR_7864	ZR	NA	2002	Ruth, Janet M.; Stanley, Thomas R.	Breeding habitat use by sympatric and allopatric populations of Wilson's warblers and yellow warblers.	NA
ZR_16919	ZR	NA	1996	Ryan, Brendan	European bee-eaters breeding in Kimberley.	NA
ZR_7880	ZR	NA	2001	Rybarczyk, Robert; Pola, Andrzej; Kolodziejczyk, Pawel; Gorka, Waldemar; Gramsz, Bozena; Zajac, Krzysztof	Breeding birds of the Nysa Luzycka, Bobr and Kwisa River valleys.	NA
ZR_7882	ZR	NA	2001	Rychlik, Leszek	Habitat preferences of water shrews and root vole coexisting along a stream in Bialowieza Forest.	NA
ZR_7881	ZR	NA	2005	Rychlik, Leszek; Ramalhinho, Maria Graca	Habitat selection of the Mediterranean water shrew (Neomys anomalus) in Portugal.	NA
ZR_16932	ZR	NA	1989	Ryser, J.; Grossenbacher, K.	A survey of amphibian preservation at roads in Switzerland.	NA
ZR_7932	ZR	NA	1989	Saint Girons, H.; Bradshaw, S. D.	Sedentarite, deplacements et repartition des individus dans une population de Lacerta viridis (Laurenti, 1768) (Lacertilia, Lacertidae).	NA
ZR_16969	ZR	NA	1984	Saint Girons, M.-C.	Impact du trafic routier sur les vertebres dans le Bocage Breton.	NA
ZR_16986	ZR	NA	1986	Salvi, A.	Consequence de la presence de lignes electriques dans la frequentation du vignoble alsacien par les etourneaux.	NA
ZR_7957	ZR	NA	1988	Samson, Fred B.; Knopf, Fritz L.; Hass, Lisa B.	Small mammal response to the introduction of cattle into a cottonwood floodplain.	NA
ZR_7982	ZR	NA	1989	Sanders, S. D.; Flett, M. A.	Montane riparian habitat and willow flycatchers: threats to a sensitive environment and species.	NA
ZR_17010	ZR	NA	2011	Sangha, Harkirat Singh	First record of long-billed vulture Gyps indicus nesting on an electricity pylon, near Sri Dungargarh, Bikaner district, Rajasthan, India.	NA
ZR_17042	ZR	NA	1981	Sargeant, A. B.	Road casualties of prairie nesting ducks.	NA
ZR_17052	ZR	NA	1992	Sarychev, V. S.	Effectiveness of nesting of the hawk Falco tinnunculus at the high-voltage power transmission line supports.	NA
ZR_17056	ZR	NA	1991	Sashikumar, C.	On the roosting of Indian whiskered tern.	NA
ZR_17061	ZR	NA	2000	Sato, Shigeho; Kuroiwa, Tetsuo	An evaluation of the roadside territory mapping method for monitoring a woodland bird community.	NA
ZR_8031	ZR	NA	1991	Saugey, D. A.; Trauth, S. E.	Distribution and habitat utilization of the four-toed salamander, Hemidactylium scutatum, in the Ouachita Mountains of Arkansas.	NA
ZR_8043	ZR	NA	1987	Savitskij, B. P.; Kulnazarov, B. K.; Krivostanenko, T. D.	[Mites - phoresants of small mammals on the banks of reclaimed canals in the Polesye area.]	NA
ZR_17084	ZR	NA	1992	Saxena, Rajiv	Mortality rate in common Indian nightjar in road accidents.	NA
ZR_17096	ZR	NA	1987	Schaal, A.	Effets d'une autoroute sur les deplacements de cerf (Cervus elaphus) en Haute-Marne, Nord-est de la France.	NA
ZR_8070	ZR	NA	1995	Schelbert, Bruno; Fischer, Josef; Gfeller, Susanne; Weggler, Martin	[The bird fauna of Reussebene. The history of development during 1971-1993.]	NA
ZR_17108	ZR	NA	1999	Schelbert-Jungo, Sybille	[Amphibians of Aargau roads. 10 years of protection measures.]	NA
ZR_8072	ZR	NA	1990	Schepers, F.; Schols, R.	The importance of the streams in south Limburg for wildlife. Birds.	NA
ZR_17120	ZR	NA	1987	Schierer, A.	Lignes electriques et cigognes blanches Ciconia ciconia.	NA
ZR_17121	ZR	NA	1988	Schierer, A.	Lignes electriques et cigognes.	NA
ZR_17123	ZR	NA	1967	Schiotz, A.	The treefrogs (Rhacophoridae) of West Africa.	NA
ZR_8087	ZR	NA	1985	Schlorff, R. W.; Bloom, P. H.	Importance of riparian systems to nesting Swainson's hawks in the Central Valley of California.	NA
ZR_8086	ZR	NA	1997	Schlorff, Ronald W.	Monitoring bank swallow populations on the Sacramento River: a decade of decline.	NA
ZR_17137	ZR	NA	1989	Schlupp, I.; Kietz, M.; Podloucky, R.; Stolz, F. M.	Pilot Project Braken: preliminary results from the resettlement of adult toads to a substitute breeding site.	NA
ZR_17140	ZR	NA	2011	Schmidt, Axel	[Amphibian protection on Lower Austrian streets - an interim report.]	NA
ZR_17148	ZR	NA	1988	Schmidt, R. K.	Behavior of white-tailed ptarmigan during the breeding season.	NA
ZR_8153	ZR	NA	1994	Schropfer, R.; Klenner-Fringes, Brigitte	[Semiaquatic mammals as monitoring organisms for river bank habitats.]	NA
ZR_8161	ZR	NA	1992	Schukman, J. M.; Mouras, T.	Probable breeding of the yellow-throated warbler (Dendroica dominica) in northeast Kansas.	NA
ZR_8171	ZR	NA	2006	Schuster, A.	Population size and population density of the breeding birds of the riverine forest and the reeds in the Reichersberger Au (Inn, Upper Austria).	NA
ZR_8178	ZR	NA	1988	Schwalbach, M. J.; Higgins, K. F.; Vandel, G. M.	Status, distribution, production and factors limiting productivity of interior least terns and piping plovers along the mainstem Missouri River, South Dakota, 1986-1987.	NA
ZR_8186	ZR	NA	1998	Schweitzer, Sara H.; Finch, Deborah M.; Leslie, David M.	The brown-headed cowbird and its riparian-dependent hosts in New Mexico.	NA
ZR_17184	ZR	NA	1997	Scoccianti, Carlo	Use of drift fences to protect a Emys orbicularis population along the	NA
ZR_17192	ZR	NA	1972	Scott, R. E.; Roberts, L. J.; Cadbury, C. J.	Bird deaths from power lines at Dungeness.	NA
ZR_8207	ZR	NA	1987	Sebastian, A. C.	An ecological study on proboscis monkeys (Nasalis larvatus) in Sarawak.	NA
ZR_17219	ZR	NA	2012	Seipke, Sergio H.	FIRST RECORD OF SOUTHERN CARACARAS (CARACARA PLANCUS) NESTING ON A HUMAN-MADE OBJECT.	NA
ZR_17220	ZR	NA	1998	Seipp, Robert; Malten, Andreas; Kohler, Gunther	[A hitherto unknown occurrence of the common wall lizard Podarcis muralis (Laurenti, 1768) in the area of the main railway freight station in Frankfurt/Main.]	NA
ZR_17232	ZR	NA	2010	Senma, Rajesh C.; Acharya, Chirag A.	First record: selection of an electrical pole as a roosting site by black ibis in North Gujarat region.	NA
ZR_17247	ZR	NA	2011	Serfling, Christianna	[Lasting conflict of amphibians and roads - first results on the status in Thuringia.]	NA
ZR_17255	ZR	NA	2000	Servole, Jordi Parpal; Pla, Sergi	Utilisation of the new habitats associated to opening of the Vallvidrera road: the case of birds.	NA
ZR_17258	ZR	NA	2008	Sevcik, Martin; Vel'ky, Marek; Cel'uch, Martin	Winter roosting of great tits (Parus major) in road bridge.	NA
ZR_17269	ZR	NA	2001	Shanbhag, A. B.; Walia, R.; Borges, S. D.	The impact of Konkan railway project on the avifauna of Carambolim Lake in Goa.	NA
ZR_17285	ZR	NA	2004	Sharma, Satish Kumar	Electric pylons used as night roost by troops of rhesus macaque Macaca mulata at Sariska Tiger Reserve, Alwar district, Rajasthan.	NA
ZR_8281	ZR	10.2307/3536911	1995	Sharp, Brian E.	Brown-headed cowbirds and grazing on national forests in the Pacific northwest.	NA
ZR_8283	ZR	NA	1988	Sharp, C.	African skimmer breeding in the south-east lowveld.	NA
ZR_17286	ZR	NA	1991	Sharrock, J. T. R.	Project for Silom barn swallows.	NA
ZR_8285	ZR	NA	1994	Shaw, J. R.	Where do thick-billed weavers go in the non-breeding season?	NA
ZR_17293	ZR	NA	2006	Shek, Chung-tong; Wan, Yip-fat	Effectiveness of animal crossing at route 3 by camera trapping.	NA
ZR_17303	ZR	NA	2002	Sherbrooke, Wade C.	Seasonally skewed sex-ratios of road-collected Texas horned lizards (Phrynosoma cornutum).	NA
ZR_8315	ZR	NA	1989	Shernazarov, E.; Biserov, M. F.	[The summer ornithofauna and abundance at the middle part of the Syrdar' River.]	NA
ZR_8331	ZR	NA	2007	Shimalov, V. V.	Helminth fauna in insectivores (Mammalia: Insectivora) of canal banks in meliorated territories.	NA
ZR_17339	ZR	NA	1983	Shupe, S.; Collins, R.	A winter roadside survey of hawks in eastern Nemaha County, Nebraska.	NA
ZR_17352	ZR	NA	2001	Sierro, Antoine; Schmid, Hans	The effects of transparent sound reducing panels on birds: a season's experience at Brig VS.	NA
ZR_17354	ZR	NA	1999	Sievert, Gregory A.; Andreadis, Paul T.; Campbell, Todd S.	A simple device for safely capturing herpetofauna from roads: the "herp scoop".	NA
ZR_17377	ZR	NA	1982	Simeon, D.; Cheylan, G.; Fonters, C.	Premier cas de nidification reussie d'un aigle de Bonelli Hieraaetus fasciatus sur un pylone electrique en Provence.	NA
ZR_8396	ZR	NA	2003	Simmon, R. E.	Carmine bee-eaters taking stick: mans heavy toll on Namibian river life.	NA
ZR_17379	ZR	NA	1989	Simmons, R.	A winter raptor road count across South Africa - by bicycle.	NA
ZR_8409	ZR	NA	1985	Simons, L. H.	Small mammal community structure in old growth and logged riparian habitat.	NA
ZR_17400	ZR	NA	1979	Sinning, J. A.; Andrew, J. W.	Habitat enhancement for Colorado squawfish in the Yampa River in conjunction with railroad construction.	NA
ZR_17401	ZR	NA	1989	Sinsch, U.	Migratory behaviour of the common toad Bufo bufo and the natterjack toad Bufo calamita.	NA
ZR_17409	ZR	NA	2008	Siwak, Pawel; Hermaniuk, Adam; Chetnicki, Wlodzimierz	Amphibian fauna of the Suwalki Landscape Park.	NA
ZR_17415	ZR	10.1111/j.1365-2907.1991.tb00289.x	1991	Skinner, C.; Skinner, P.; Harris, S.	The past history and recent decline of badgers Meles meles in Essex: an analysis of some of the contributory factors.	NA
ZR_17432	ZR	NA	2002	Sliwinski, Edward	Hobbies Falco subbuteo breeding near paved roads in Noord-Brabant in 2001.	NA
ZR_17451	ZR	NA	1989	Smislovs, V.; Kurochkin, A.	Bird kills on Latvian railroads.	NA
ZR_17467	ZR	NA	1987	Smith, F. T. H.	Migrating waders come to grief.	NA
ZR_8484	ZR	NA	1981	Smith, G.	Observations on short-eared owls along the R. Crouch.	NA
ZR_17481	ZR	NA	2004	Smith, Neil	Feeding on roads and associated mortality in the hamerkop.	NA
ZR_17483	ZR	NA	1986	Smith, P.	A common birds census on a disused railway line at Thorverton, 1973-1986.	NA
WOS_28765	WOS	NA	1992	SMITH, RJ; SCHAEFER, JM	AVIAN CHARACTERISTICS OF AN URBAN RIPARIAN STRIP CORRIDOR	Wilson Bulletin
ZR_17491	ZR	NA	1983	Smith, W. T.; Cameron, R. D.	Factors affecting pipeline crossing success of caribou.	NA
ZR_17493	ZR	NA	1986	Smith, W. T.; Cameron, R. D.	Distribution and movements of caribou in relation to the Kuparuk Development Area.	NA
ZR_17489	ZR	NA	1984	Smith, W. T.; Cameron, R. D.; Whitten, K. R.	Distribution and movements of caribou in relation to the Kuparuk development area.	NA
ZR_17490	ZR	NA	1985	Smith, W. T.; Cameron, R. D.; Whitten, K. R.	Development and alteration of caribou movement patterns.	NA
WOS_28878	WOS	NA	2005	Sogge, M. K.; Felley, D.; Wotawa, M.	A quantitative model of avian community and habitat relationships along the Colorado River in the Grand Canyon	NA
ZR_17532	ZR	NA	2012	Songhurst, Steve; Hitchin, James; Oram, Steve; Scully, David	Dormice found on our first wildlife bridge.	NA
ZR_17533	ZR	NA	1997	Soper, Roderick; Schoeberl, Karl	Mitigation of impacts to timber rattlesnakes (Crotalus horridus horridus) during replacement of a natural gas transmission line in southeastern New York.	NA
ZR_17534	ZR	NA	1991	Sopuck, L. G.; Jakimichuk, R. D.; Vernam, D. J.	Status and distribution of Dall sheep in relation to the Trans-Alaska Pipeline.	NA
ZR_17539	ZR	NA	1994	Soroczynski, Mike	Abundance of lilacbreasted rollers Coracias caudata in the Jwaneng area.	NA
ZR_8569	ZR	10.2307/1444957	1986	Southerland, M. T.	The effects of variation in streamside habitats on the composition of mountain salamander communities.	NA
ZR_8567	ZR	NA	2008	Southerland, Mark T.; Stranko, Scott A.	Fragmentation of riparian amphibian distributions by urban sprawl in Maryland, USA.	NA
ZR_17543	ZR	NA	1990	Southwell, C.; Fletcher, M.	The use of roads and tracks as transect routes for surveying the abundance of whiptail wallabies, Macropus parryi (Marsupialia: Macropodidae).	NA
ZR_17561	ZR	NA	2005	Spautz, Hildie; Nur, Nadav; Stralberg, Diana	California black rail (Laterallus jamaicensis coturniculus) distribution and abundance in relation to habitat andlandscape features in the San Francisco Bay Estuary.	NA
ZR_17572	ZR	NA	1978	Spencer, R.	Blackbird entering railway station.	NA
ZR_17584	ZR	NA	1993	Spotila, James R.; Ruby, Douglas E.; Kemp, Stanley J.; Zimmerman, Linda C.	Behavioral responses by desert tortoises (Gopherus agassizii) to roadside barriers: a preliminary study.	NA
ZR_8610	ZR	NA	1999	Staab, Cara A.; Morrison, Michael L.	Managing riparian vegetation to control cowbirds.	NA
ZR_17604	ZR	10.2307/1367196	1978	Stahlecker, D. W.	Effect of a new transmission line on wintering prairie raptors.	NA
ZR_17607	ZR	NA	1999	Stamer, Hans-H.	[Efficient biotope networking constructions on roads for amphibians and other small animals.]	NA
ZR_17618	ZR	NA	1979	Stapleton, J.; Kiviat, E.	Rights of birds and rights of way.	NA
WOS_29274	WOS	NA	1980	STAUFFER, DF; BEST, LB	HABITAT SELECTION BY BIRDS OF RIPARIAN COMMUNITIES - EVALUATING EFFECTS	Journal of Wildlife Management
WOS_29275	WOS	NA	1986	STAUFFER, DF; BEST, LB	NEST-SITE CHARACTERISTICS OF OPEN-NESTING BIRDS IN RIPARIAN HABITATS IN IOWA	Wilson Bulletin
ZR_17640	ZR	NA	1988	Stedman, S. J.	The winter roadside raptor survey in Tennessee: 1986-1987 results.	NA
ZR_8653	ZR	NA	1997	Steger, George N.; Eberlein, Gary E.; Munton, Thomas E.; Johnson, Kenenth D.	Characteristics of California spotted owl nest sites in foothill riparian and oak woodlands of the southern Sierra Nevada, California.	NA
ZR_17660	ZR	NA	1996	Stepanyan, I. L.	To the question of birds damages of the power systems.	NA
ZR_17668	ZR	NA	1983	Stevens, D. W.	Preliminary analysis of transmission line impact on desert bighorn sheep movement patterns.	NA
ZR_8717	ZR	NA	1999	Stolarz, Przemyslaw; Sobocinski, Wojciech; Stolarz, Ewa	[The European beaver Castor fiber in the Swider Nature Reserve.]	NA
ZR_17687	ZR	NA	1987	Stolt, B.-O.; Fransson, T.	What bird species suffer the greatest losses from electrocutions and collisions with transmission lines?	NA
ZR_17690	ZR	NA	2001	Stone, Ward B.; Nye, Peter E.; Okoniewski, Joseph C.	Bald eagles killed by trains in New York State.	NA
ZR_17693	ZR	NA	1925	Storer, T. I.	A Synopsis of the Amphibia of California.	NA
ZR_8737	ZR	NA	2003	Strachan, R.; Moorhouse, T.; Macdonald, D. W.	Enhancing habitat for riparian mammals on agricultural land.	NA
ZR_8739	ZR	NA	1997	Strachan, Rob	Water voles.	NA
ZR_8741	ZR	NA	2012	Strain, Gabriel F.; Kazyak, David	Headwaters and Headlamps: A Comparison of Nocturnal and Diurnal Surveys to Estimate Richness, Abundance, and Detection of Streamside Salamanders.	NA
ZR_17701	ZR	NA	1999	Straka, Ulrich	First breeding record of the saker falcon Falco cherrug in the Tullner Feld (Lower Austria) - first record of a saker falcon breeding on the pylon of a high voltage overhead powerline in Austria.	NA
ZR_8743	ZR	NA	1999	Strand, Mac; Merritt, Richard W.	Impacts of livestock grazing activities on stream insect communities and the riverine environment.	NA
ZR_8752	ZR	NA	1990	Strazds, M.; Strazds, A.	Changes of the avifauna of the Gauja river (1933-1988).	NA
ZR_17710	ZR	NA	1976	Street, M.; MacDonald, T.	Amey Roadstone Wildfowl Project: 1976.	NA
ZR_17714	ZR	NA	1988	Strelkov, P. P.	[Railway use in studying the distribution of synanthropic species of bats.]	NA
ZR_8755	ZR	NA	1994	Strelnikov, Eugeniy G.	Counts of great grey owl broods in the Negus'yakh river valley (The Yuganskiy State Reserve, western Siberia).	NA
ZR_8762	ZR	NA	1988	Strong, T. R.	Bird communities in the riparian habitats of the Huachuca Mountains and vicinity in southeastern Arizona.	NA
WOS_29672	WOS	10.2307/1380682	1982	STROUD, DC	POPULATION-DYNAMICS OF RATTUS-RATTUS AND RATTUS-NORVEGICUS IN A RIPARIAN HABITAT	Journal of Mammalogy
ZR_17723	ZR	NA	1996	Struass, Thomas	[Observations on two successful breeding records of the hobby (Falco subbuteo) on high voltage masts in the Altenburger Land.]	NA
ZR_17748	ZR	NA	1993	Sugiura, Hideki; Agetsuma, Naoki; Tanaka, Toshiaki	Provisioned monkeys among wild population of Japanese macaques in Yakushima Island.	NA
ZR_17751	ZR	10.2307/1563391	1981	Sullivan, B. K.	Distribution and relative abundance of snakes along a transect in California.	NA
WOS_29789	WOS	NA	1993	SULLIVAN, BK	DISTRIBUTION OF THE SOUTHWESTERN TOAD (BUFO-MICROSCAPHUS) IN ARIZONA	Great Basin Naturalist
ZR_17775	ZR	NA	1991	Sungaila, A.	Strange refuge for little lorikeets.	NA
ZR_8835	ZR	NA	2012	Suzuki, Kei; Yanagawa, Hisashi	Different nest site selection of two sympatric arboreal rodent species, Siberian flying squirrel and small Japanese field mouse, in Hokkaido, Japan.	NA
ZR_17805	ZR	NA	1987	Swengel, S. R.	Black-necked stilt near Main Dike Road in Horicon National Wildlife Refuge.	NA
ZR_17810	ZR	10.2307/1381184	1984	Swihart, R. K.; Slade, N. A.	Road crossing in Sigmodon hispidus and Microtus ochrogaster.	NA
ZR_8875	ZR	NA	1980	Szaro, R. C.	Factors influencing bird populations in southwestern riparian forests.	NA
ZR_8871	ZR	NA	1987	Szaro, R. C.; Belfit, S. C.	Small mammal use of a desert riparian island and its adjacent scrub habitat.	NA
ZR_8869	ZR	NA	1985	Szaro, R. C.; Belfit, S. C.; Aitkin, J. K.; Rinne, J. N.	Impact of grazing on a riparian garter snake.	NA
WOS_30062	WOS	10.2307/3670905	1981	SZARO, RC	BIRD POPULATION RESPONSES TO CONVERTING CHAPARRAL TO GRASSLAND AND RIPARIAN HABITATS	Southwestern Naturalist
WOS_30064	WOS	10.2307/3800996	1986	SZARO, RC; BELFIT, SC	HERPETOFAUNAL USE OF A DESERT RIPARIAN ISLAND AND ITS ADJACENT SCRUB HABITAT	Journal of Wildlife Management
WOS_30065	WOS	10.2307/1367948	1985	SZARO, RC; JAKLE, MD	AVIAN USE OF A DESERT RIPARIAN ISLAND AND ITS ADJACENT SCRUB HABITAT	Condor
ZR_8878	ZR	NA	1988	Szaro, Robert C.; Belfit, Scott C.; Aitkin, J. Kevin; Babb, Randall D.	The use of timed fixed-area plots and a mark-recapture technique in assessing riparian garter snake populations.	NA
ZR_8879	ZR	NA	1988	Szaro, Robert C.; Simons, Lee H.; Belfit, Scott C.	Comparative effectiveness of pitfalls and live-traps in measuring small mammal community structure.	NA
ZR_8881	ZR	NA	1991	Szep, T.	Number and distribution of the Hungarian sand martin (Riparia riparia L., 1758) population breeding along the Hungarian reaches of the River Tisza.	NA
ZR_8886	ZR	NA	1993	Szombath, Zoltan; Kohl, Istvan; Konya, Istvan; Libus, Andras; Szombath, Istvan; Sarkany-Kiss, Endre	State of the sand martin (Riparia riparia) population nesting along the Romanian section of the river Maros in 1991.	NA
ZR_17825	ZR	NA	1983	Taapken, J.	[Magpie nest on railway electric overhead gantry.]	NA
ZR_17864	ZR	NA	2005	Tappe, Philip A.	Deer-vehicle collisions in Arkansas.	NA
ZR_8937	ZR	10.2307/3899062	1986	Taylor, D. M.	Effects of cattle grazing on passerine birds nesting in riparian habitat.	NA
WOS_30348	WOS	10.2307/3899062	1986	TAYLOR, DM	EFFECTS OF CATTLE GRAZING ON PASSERINE BIRDS NESTING IN RIPARIAN HABITAT	Journal of Range Management
ZR_8941	ZR	NA	2008	Taylor, Jimmy; Bergman, David; Nolte, Dale	If you build it, they will come - management planning for a suburban beaver population in Arizona.	NA
ZR_17887	ZR	NA	1983	Telegin, V. I.; Ivleva, N. G.	[Birds on roads.]	NA
ZR_17888	ZR	NA	1992	Telegin, V. I.; Ivleva, N. G.	Birds on the motor-roads.	NA
ZR_8967	ZR	NA	1999	Tellini Florenzano, Guido; Siemoni, Nicola	[The bird fauna distribution along a northern Appenine stream (Tuscany, central Italy).]	NA
WOS_30531	WOS	NA	1985	THEURER, FD; LINES, I.; NELSON, T.	INTERACTION BETWEEN RIPARIAN VEGETATION, WATER TEMPERATURE, AND SALMONID HABITAT IN THE TUCANNON RIVER	Water Resources Bulletin
WOS_30542	WOS	10.2307/2425590	1985	THIEL, RP	RELATIONSHIP BETWEEN ROAD DENSITIES AND WOLF HABITAT SUITABILITY IN WISCONSIN	American Midland Naturalist
ZR_17920	ZR	NA	1993	Thiele, Andreas	[The occurrence and protection of Amphibia and Reptilia in Arnstadt region (Thuringia).]	NA
ZR_9008	ZR	NA	2007	Thiele, Ralf	The amphibians of the "Unterfeld Guntersblum" (Rhinehesse, SW Germany).	NA
ZR_9010	ZR	NA	2007	Thiele, Ralf	The reptiles of the "Unterfeld Guntersblum" (Rhinehesse, SW Germany).	NA
ZR_9019	ZR	NA	1998	Thom, T. J.; Thomas, C. J.; Dunstone, N.; Evans, P. R.	The relationship between riverbank habitat and prey availability and the distribution of otter (Lutra lutra) signs: an analysis using a geographical information system.	NA
ZR_17950	ZR	NA	1990	Thomsett, S.	Blackshouldered kite road mortalities.	NA
WOS_30690	WOS	NA	1994	THURBER, JM; PETERSON, RO; DRUMMER, TD; THOMASMA, SA	GRAY WOLF RESPONSE TO REFUGE BOUNDARIES AND ROADS IN ALASKA	Wildlife Society Bulletin
ZR_17969	ZR	NA	1997	Tikhonova, G. N.; Tikhonov, I. A.; Bogomolov, P. L.; Bodyak, N. D.; Surov, A. V.	Small mammals of green territories along railways in Moscow.	NA
ZR_17976	ZR	NA	2003	Tinarelli, Roberto; Tirelli, Elena	[Avifauna mortality due to electric pylons of average voltage in three areas of the Bologna Apennines.]	NA
ZR_17988	ZR	NA	1992	Titus, K.; Beier, L. R.	Population and habitat ecology of brown bears on Admiralty and Chichagof Islands.	NA
ZR_9086	ZR	NA	1998	Titus, Kimberly; Beier, LaVern R.	Population and habitat ecology of brown bears on Admiralty and Chichagof Islands.	NA
ZR_9087	ZR	NA	1999	Titus, Kimberly; Beier, Lavern R.	Suitability of stream buffers and riparian habitats for brown bears.	NA
ZR_9088	ZR	NA	1999	Titus, Kimberly; Flynn, Rodney W.; Pendleton, Grey W.; Beier, LaVern R.	Population and habitat ecology of brown bears on Admirality and Chichagof islands.	NA
ZR_9089	ZR	NA	1999	Tiunov, I. M.	Zonal distribution of birds along middle reaches of Khor reiver (Khabarovsk Territory).	NA
ZR_9097	ZR	NA	2000	Tocchetto, Giorgio	Survey on earth structure of coypu and their possible impact on river banks.	NA
ZR_18009	ZR	NA	1987	Tombal, J.-C.	L'avifaune nicheuse des talus boises d'une voie ferree en tranchee.	NA
ZR_9159	ZR	NA	1985	Trapp, G. R.; Linck, G. L.; Whisler, E. D.	The status of ecological research on the mammal fauna of California's Central Valley riparian communities.	NA
ZR_18040	ZR	NA	1995	Travaini, Alejandro; Rodriguez, Alejandro; Ceballos, Olga; Donazar, Jose A.; Hiraldo, Fernando	Roadside raptor surveys in central Argentina.	NA
WOS_31071	WOS	NA	1990	TRIQUET, AM; MCPEEK, GA; MCCOMB, WC	SONGBIRD DIVERSITY IN CLEARCUTS WITH AND WITHOUT A RIPARIAN BUFFER STRIP	Journal of Soil and Water Conservation
ZR_9181	ZR	NA	2011	Triska, Maggie D.; Loughry, Steven C.; Serfass, Thomas L.	RIVER OTTERS USE AGRICULTURAL FIELD ALONG THE TURTLE RIVER IN EASTERN NORTH DAKOTA AS CROSSOVER AND LATRINE AREA.	NA
ZR_18064	ZR	NA	2012	Tritsi, Christina; Dimitra, Elisabeth; van Dormaal, Nick; Mertzanis, Yorgos; Lazarou, Y.; Aravidis, El; Giannakopoulos, Al; Iliopoulos, Y.; Riegler, Suzanne; Riegler, Armin; Tsaknakis, Yannis	Monitoring Brown Bear Crossings of the Egnatia Highway, Greece - New Rookies on Board!	NA
ZR_18066	ZR	NA	1993	Trodd, Paul	Hobbies nesting on pylon.	NA
ZR_18068	ZR	NA	2012	Trollope, Charles E.; Cottage, Chaucer; Green, Iden	Hobbies take advantage of the gravy train.	NA
ZR_9206	ZR	NA	1980	Tubbs, A. A.	Riparian bird communities of the Great Plains.	NA
ZR_18099	ZR	NA	1995	Tucker, John K.	Notes on road-killed snakes and their implications on habitat modification due to summer flooding on the Mississippi River in west central Illinois.	NA
ZR_18100	ZR	NA	1999	Tucker, John K.	Nest site "selection" and red-eared sliders (Trachemys scripta elegans).	NA
ZR_18106	ZR	NA	1999	Turau, Maria; Turau, Volker	[White stork nests on a motorway sign.]	NA
ZR_18121	ZR	NA	2004	Tyler, Stephanie	Road counts of crows and raptors in Namaqualand.	NA
ZR_9239	ZR	NA	1993	Tyler, Stephanie J.; Ormerod, Stephen J.	The ecology of river birds in Nepal.	NA
ZR_18125	ZR	NA	1994	Ueda, Keisuke; Nagano, Yoshiharu; Moriya, Toshifumi; Esaki, Masahiro; Ogawa, Yumiko	Night census of the woodcock on Nakano-shima of the Tokara Islands, southwestern Japan.	NA
ZR_18130	ZR	NA	1994	Uhrin, Marcel	The finding of a mass winter colony of Barbastella barbastellus and Pipistrellus pipistrellus (Chiroptera, Vespertilionidae) in Slovakia.	NA
ZR_9249	ZR	NA	1999	Ulevicius, Alius; Balciauskas, Linas	Spatial relations among semi-aquatic mammals on the riverside.	NA
ZR_9260	ZR	NA	1995	Usgaard, Robert E.; Higgins, Kenneth F.	Availability and suitability of bald eagle and osprey nesting habitat in the northern prairie region.	NA
ZR_9269	ZR	NA	2001	Utschick, Hans; Karrlein, Martina	Amphibian protection strategies in developing the riverine nature reserve Lower Alz (upper Bavaria).	NA
ZR_9270	ZR	NA	2012	Utschick, Hans; Michl, Stephanie Celine; Heitland, Werner	Riparian forest birds as indicators for monitoring flood plain renaturation.	NA
ZR_18151	ZR	NA	1997	Vaernesbranden, Per Inge	[Important ornithological site in Trondheimfjorden under threat of motorway construction.]	NA
ZR_18157	ZR	NA	1997	Valentic, Robert A.; Turner, Grant	Diet and reproductive status of a road-kill Spencer's monitor Varanus spenceri.	NA
ZR_18158	ZR	NA	1998	Valentic, Robert A.; Turner, Grant	Observations of nocturnal basking and activity in several agamid species.	NA
ZR_9297	ZR	NA	1988	van Arkel, H.	[Amphibia of the river dams in Vijfheerenlanden.]	NA
ZR_9305	ZR	NA	1984	van den Bergh, L.; Helmer, J.	[On the occurrence of the spotted crake (Porzana porzana) along the banks of the large rivers during 1983.]	NA
ZR_18206	ZR	10.1111/j.1442-8903.2006.312_3.x	2006	van der Ree, Rodney	Road upgrade in Victoria a filter to the movement of the endangered squirrel glider (Petaurus norfolcensis): results of a pilot study.	NA
ZR_18207	ZR	NA	1989	van der Reest, P. J.	Small mammals of road verges.	NA
ZR_9318	ZR	NA	1994	van der Vliet, Floor	[River bank management and the occurrence of the root vole.]	NA
ZR_9328	ZR	NA	1999	van Eekelen, Rombout; Winter, Leo	[Is the otter on the way back?]	NA
ZR_9333	ZR	NA	1992	van Laar, Vincent	[The distribution of amphibians in the Eem delta.]	NA
ZR_9334	ZR	NA	1994	van Laar, Vincent	[Habitat requirements of the European water shrew.]	NA
ZR_18244	ZR	NA	2000	van Rooyen, Chris S.	Raptor mortality on powerlines in South Africa.	NA
ZR_9352	ZR	NA	1993	van Wingerden, Walter K. R. E.; Dimmers, Wim J.	Effects of rabbit and cattle grazing on grasshoppers (Orthoptera: Acrididae) of river dunes.	NA
ZR_18186	ZR	NA	1993	Vanderburgh, David C.	Manitoba hydro accommodates osprey activity.	NA
WOS_31719	WOS	10.1016/0006-3207(80)90006-3	1980	VANDERZANDE, AN; KEURS, WJT; VANDERWEIJDEN, WJ	THE IMPACT OF ROADS ON THE DENSITIES OF 4 BIRD SPECIES IN AN OPEN-FIELD HABITAT - EVIDENCE OF A LONG-DISTANCE EFFECT	Biological Conservation
ZR_9329	ZR	NA	1993	Vangeluwe, Didier; Bulteau, Vincent; Dineur, Henri; Rifflet, Michel	Densite et distribution du cincle plongeur (Cinclus cinclus) dans le bassin de la Haute Meuse belge.	NA
ZR_9353	ZR	NA	2008	Varanguin, Nicolas; Sirugue, Daniel	[Reconquering of rivers by the otter in Burgundy.]	NA
ZR_9361	ZR	NA	1990	Varty, N.	Mammals of the riverine forests of the Jubba Valley.	NA
ZR_9380	ZR	NA	2001	Veenbaas, Geesje; Brandjes, Jeroen	Use by mammals of fauna passages along waterways under motorways.	NA
ZR_9389	ZR	NA	1989	Velensky, P.	The snakes of south east Bulgaria. Part 1.	NA
WOS_31901	WOS	NA	1981	VERHOEFF, J.; VANDERWENDE, T.; SCHOTMAN, AJH	TESTING THE BLOOD FOR CONCENTRATIONS OF LEAD IN CATTLE FED ROUGHAGE FROM GRASS VERGES OF FAST MOTOR-ROADS	Tijdschrift Voor Diergeneeskunde
ZR_9402	ZR	NA	1987	Verkaik, A. J.	The muskrat in the Netherlands.	NA
ZR_18301	ZR	10.1016/0169-2046(94)01050-I	1995	Vermeulen, H. J. W.; Opdam, P. F. M.	Effectiveness of roadside verges as dispersal corridors for small ground-dwelling animals: a simulation study.	NA
ZR_9406	ZR	NA	1987	Verrell, P. A.	Habitat destruction and its effect on a population of smooth newts, Triturus vulgaris: an unfortunate field experiment.	NA
ZR_18307	ZR	NA	1983	Verstrael, T.; ter Keurs, W.; van der Zander, A.; van der Weijden, W.	[The distribution of wading birds by road construction.]	NA
ZR_18317	ZR	NA	2002	Vidic, Jana	Amphibians and traffic.	NA
ZR_18320	ZR	NA	1996	Vieira, Emerson M.	Highway mortality of mammals in central Brazil.	NA
ZR_9448	ZR	NA	2008	Villasenor-Gomez, Jose Fernando	Habitat use of wintering bird communities in Sonora, Mexico: the importance of riparian habitats.	NA
ZR_9467	ZR	NA	1996	Vlasak, Petr; Pivnicka, Karel	Small mammal communities in the Upor riparian habitat: spatial distribution and microhabitat preference.	NA
ZR_18364	ZR	NA	2000	Vogel, Peter; Broennimann, Max	The (Mus domesticus) population of the Simplon Tunnel: its origin and hypotheses on its ecology.	NA
ZR_18366	ZR	NA	1995	Vogel, Z.; Puky, M.	A fast environmental impact assessment method for the evaluation of road construction effects on amphibian communities.	NA
ZR_9480	ZR	NA	1999	Vollmer, Alexander; Grosse, Wolf-Rudiger	Comparative considerations of habitat use of the fire-bellied toad (Bombina bombina L.) in meadow biotopes in the riverside landscape of the river Elbe near Dessau (Saxony-Anhalt).	NA
ZR_18386	ZR	NA	1977	Voorhees, L. D.	Waterfowl nesting : highway right-of-way mowing versus succession.	NA
WOS_32170	WOS	10.2307/3808361	1980	VOORHEES, LD; CASSEL, JF	HIGHWAY RIGHT-OF-WAY - MOWING VERSUS SUCCESSION AS RELATED TO DUCK NESTING	Journal of Wildlife Management
ZR_18390	ZR	NA	1983	Voronov, B. A.	[Bird populations of the pine forests along the eastern section of Baikal-Amur Railway (BAM).]	NA
ZR_9493	ZR	NA	1992	Voronov, G. A.	Microtus fortis (Rodentia, Cricetidae), a new species in the fauna of Sakhalin Island.	NA
WOS_32205	WOS	NA	2001	Vrentas, J. M.; Petrovic, N.; Crandall, S.; Richardson, M.	Investigating successional vegetation changes and their relation to sensitive small mammal habitats in a primitive montane riparian environment	NA
ZR_9517	ZR	NA	1990	Walcot, T.	Some birds of the River Gambia.	NA
ZR_9542	ZR	NA	1987	Walsh, J. F.; Sowah, S. A.; Yamagata, Y.	Newly discovered colonies of the northern carmine bee-eater Merops nubicus in Ghana and Togo.	NA
ZR_18443	ZR	NA	1985	Walters, I. N.	Birds of a railway yard at Corinda, Queensland.	NA
ZR_9574	ZR	NA	1994	Wansink, Dennis; Lanting, Willeke	[Mammals along the water's edge: report from a symposium held on 5 March 1994.]	NA
ZR_18462	ZR	NA	1992	Warbrick, S.; Burton, P.; Clark, N. A.	A case study of the impacts of pipeline construction on bird distribution in the Duddon Estuary.	NA
ZR_9591	ZR	NA	1991	Wardell-Johnson, G.; Roberts, J. D.	The survival status of the Geocrinia rosea (Anura: Myobatrachidae) complex in riparian corridors: biogeographical implications.	NA
ZR_18470	ZR	NA	1992	Warner, R. E.; David, L. M.; Etter, S. L.; Joselyn, G. B.	Costs and benefits of roadside management for ring-necked pheasants in Illinois.	NA
ZR_18471	ZR	NA	1987	Warner, R. E.; Joselyn, G. B.; Etter, S. L.	Factors affecting roadside nesting by pheasants in Illinois.	NA
ZR_9607	ZR	NA	1985	Warren, P. L.; Schwalbe, C. R.	Herpetofauna in riparian habitats along the Colorado River in Grand Canyon.	NA
ZR_18510	ZR	NA	1987	Webb, G. A.	Stomach contents of some reptiles killed on roads in the Bombala area, New South Wales.	NA
ZR_9648	ZR	NA	1988	Webster, R.	The superb parrot. A survey of the breeding distribution and habitat requirements.	NA
ZR_9650	ZR	NA	1984	Weeks, H. P.	Importance and management of riparian bridges and culverts for nesting passerines.	NA
ZR_18526	ZR	NA	2005	Weicherding, Franz-Josef	List of records of the common wall lizard Podarcis muralis (Laurenti, 1768) on railway sites in the Saarland and the adjacent Lorraine.	NA
ZR_18538	ZR	NA	2010	Weiss, Felix; Koenig, Christopher; Moning, Christoph; Wagner, Christian	[Wangerooge island in Lower Saxony - bird watchers on the railway.]	NA
ZR_18540	ZR	NA	1996	Weissgerber, Rolf	[Breeding record of ravens (Corvus corax) on the grid mast of a power line near Wurchwitz, Nissma and Kriebitzsch.]	NA
ZR_9677	ZR	NA	1999	Welch, James R.; Wolf, Dorothy J.; Menzel, Michael A.; Laerm, Joshua	Notes on the effect of riparian zones in structuring salamander communities in the southern Appalachians.	NA
ZR_18543	ZR	10.1016/0013-9327(75)90068-3	1975	Welch, W. R.; Dick, D. L.	Lead concentrations in tissues of roadside mice.	NA
ZR_9681	ZR	NA	1979	Wells, D.; Anderson, B. W.; Ohmart, R. D.	Comparative avian use of southwestern citrus orchards and riparian communities.	NA
ZR_18548	ZR	NA	1996	Wells, Mike; Langton, Tom; Garland, Lincoln; Wilson, Gavin	The value of motorway verges for reptiles - a case study.	NA
ZR_18564	ZR	NA	1997	Wester, Edward E.; Kolb, Joe W.	Conservation of the gopher tortoise and associated species during construction of the Florida Gas Transmission Company Phase III Expansion Project.	NA
ZR_18565	ZR	NA	1996	Weston, M. A.	An unusual foraging habitat of the red-capped plover.	NA
ZR_18588	ZR	NA	1987	White, C. M.; Boyce, D. A.	Notes on the mountain caracara (Phalcoboenus megalopterus) in the Argentine puna.	NA
ZR_9744	ZR	NA	2009	Whiting, Christian; Finnemore, Mick	Bat surveys along the rivers Bure, Thurne, Waveney and Yare (2004-2008) for the Broadland Flood Alleviation Project.	NA
ZR_9748	ZR	NA	1974	Whitmore, R. C.	Habitat ordination of breeding passerine birds of the riparian community of southwestern Utah.	NA
ZR_9775	ZR	NA	1995	Wikramanayake, Eric D.	Activity and thermal ecophysiology of two sympatric monitor lizards in Sri Lanka.	NA
WOS_33251	WOS	10.2307/3670722	1982	WILKINS, KT	HIGHWAYS AS BARRIERS TO RODENT DISPERSAL	Southwestern Naturalist
ZR_18648	ZR	NA	1998	Wilkinson, David M.	Rooks feeding inside station.	NA
WOS_33262	WOS	NA	1990	WILLARD, TR; HALL, DW; SHILLING, DG; LEWIS, JA; CURREY, WL	COGONGRASS (IMPERATA-CYLINDRICA) DISTRIBUTION ON FLORIDA HIGHWAY RIGHTS-OF-WAY	Weed Technology
ZR_18650	ZR	NA	1980	Willey, C. H.; Marion, L. F.	Transmission line corridor crossings for white-tailed deer.	NA
ZR_9796	ZR	10.1080/00306525.1989.9634510	1989	Williams, G. D.; Coppinger, M. P.; Maclean, G. L.	Distribution and breeding of the rock pratincole on the Upper and Middle Zambezi River.	NA
ZR_9799	ZR	NA	1987	Williams, J.	Birding on the Zambezi River.	NA
ZR_9804	ZR	NA	2010	Williams, Livy	Green Ratsnake (Senticolis triaspis): habitat and activity.	NA
ZR_9805	ZR	NA	1989	Williams, M.; Williams, J. G.	Avifauna and riparian vegetation in Camel Valley, Monterey County, California.	NA
ZR_18659	ZR	NA	1990	Williams, R. D.	Bobcat electocutions on powerlines.	NA
ZR_18661	ZR	NA	1989	Williams, S. O.	Notes on the rail Rallus longirostris tenuirostris in the highlands of central Mexico.	NA
ZR_9809	ZR	NA	1994	Williams, Steve	The importance of riparian habitats to vertebrate assemblages in north Queensland woodlands.	NA
ZR_18663	ZR	NA	1972	Williamson, P.; Evans, P. R.	Lead: levels in roadside invertebrates and small mammals.	NA
ZR_18689	ZR	NA	2006	Wilson, Malcolm	African white-backed vulture nesting on electricity pylon in Limpopo Province, South Africa.	NA
ZR_18707	ZR	NA	2009	Winkelman, Joke	[Safe passage for bats.]	NA
ZR_18710	ZR	NA	1993	Winter, L.	[The otter in Limburg: the distribution of the otter (Lutra lutra L.) in Limburg and a proposal for an ecological infrastructure.]	NA
WOS_33447	WOS	NA	2004	Wisdom, M. J.; Cimon, N. J.; Johnson, B. K.; Garton, E. O.; Thomas, J. W.	Spatial partitioning by mule deer and elk in relation to traffic	Transactions of the Sixty-Ninth North American Wildlife and Natural Resources Conference
WOS_33472	WOS	NA	1985	WITMER, GW; DECALESTA, DS	EFFECT OF FOREST ROADS ON HABITAT USE BY ROOSEVELT ELK	Northwest Science
ZR_18731	ZR	NA	1977	Woffinden, N. D.; Murphy, J. R.	A roadside raptor census in the eastern Great Basin - 1973-1974.	NA
ZR_9884	ZR	NA	1987	Wolk, K.	Association of breeding birds in riparian zone of the Oswin Lake Reserve.	NA
ZR_18745	ZR	NA	1988	Wood, B.	Roadside bird counts from southern Somalia.	NA
ZR_9895	ZR	NA	1990	Wood, Brian	The bird community of riverine forest in Somalia.	NA
ZR_9896	ZR	NA	2006	Wood, Douglas R.; Reasor, Jona	Prothonotary warbler reproductive success and site fidelity in a fragmented Oklahoma landscape.	NA
ZR_18750	ZR	NA	2010	Woodall, Leith B.	Work n bird: a roadside bird survey in suburban Brisbane.	NA
ZR_18751	ZR	NA	2010	Woodall, Peter F.; Woodall, Leith B.	Roadside counts of raptors and other large birds and their correlation with dead macropods during the QNC 2009 excursion to Bladensburg National Park, central-west Queensland.	NA
ZR_9905	ZR	NA	1994	Woodroffe, Gordon	The water vole - some aspects of its ecology.	NA
ZR_9906	ZR	NA	2006	Woodroffe, Gordon	Riparian mammals of the Lower Derwent Valley.	NA
ZR_18792	ZR	NA	2001	Wydeven, Adrian P.; Mladenoff, David J.; Sickley, Theodore A.; Kohn, Bruce E.; Thiel, R. P.; Hansen, Jennifer L.	Road density as a factor in habitat selection by wolves and other carnivores in the Great Lakes region.	NA
ZR_18820	ZR	NA	1980	Yalden, D. W.	Urban small mammals.	NA
ZR_18839	ZR	10.2307/1369264	1992	Yasukawa, K.; Boley, R. A.; McClure, J. L.; Zanocco, J.	Nest dispersion in the red-winged blackbird.	NA
ZR_18872	ZR	NA	1987	Young, M.	Toads go underground.	NA
ZR_18873	ZR	NA	2013	Young, Megan E.; Boyarski, Valerie L.	THAMNOPHIS GIGAS (Giant Gartersnake). MOVEMENT.	NA
ZR_18923	ZR	10.2307/1368864	1988	Zembal, R.; Fancher, J. M.	Foraging behaviour and foods of the light-footed clapper rail.	NA
ZR_18928	ZR	NA	2009	Zeng, Zhi-gao; Li, Jun-sheng; Yan, Wen-bo; Fan, Jun-tao; Song, Yan-ling	Impact of Lanzhou-Chongqing highway and railway on the movement of giant pandas and their habitat protection.	NA
ZR_10072	ZR	NA	1991	Zerong, Shi	Preliminary observations on the winter foraging ecology of oriental white storks (Ciconia boyciana) in Jiangsu Province, China.	NA
ZR_18957	ZR	NA	2013	Zhorov, D. G.; Sidorovich, A. A.	Analysis of species structure and mortality rates of mammals (Mammalia L.) dying on roads with different intensity of movement in Belarus.	NA
ZR_10094	ZR	NA	2004	Zicus, Michael C.; Rave, David P.; Das, Abhik; Riggs, Michael R.; Buitenwerf, Michelle L.	Influence of land use on mallard nest structure occupancy.	NA
ZR_10123	ZR	NA	1987	Zolotarev, A. A.	Comparative analysis of foods and space distribution of three species of the owls (Strigidae).	NA
ZR_18998	ZR	NA	1989	Zuiderwijk, A.	Amphibian and reptile tunnels in the Netherlands.	NA
WOS_35120	WOS	NA	1978	ZUMETA, DC; HOLMES, RT	HABITAT SHIFT AND ROADSIDE MORTALITY OF SCARLET TANAGERS DURING A COLD WET NEW-ENGLAND SPRING	Wilson Bulletin
ZR_19001	ZR	NA	1984	Zvonov, B. M.; Krivonosov, G. A.	[Mortality of raptors on LEP-10 power line supports in Kalmyk and ways of avoiding it.]	NA
